# Supplementary material for: AgPd, AuPd, and AuPt Nanoalloys with Ag- or Au-Rich Compositions: Modeling Chemical Ordering and Optical Properties
Source: PubMed Central journal article supplement (PMC8397350; doi:10.1021/acs.jpcc.1c04222), 2021-07-30
Supplement: jp1c04222_si_001.pdf [file jp1c04222_si_001.pdf]

# Supporting Information

## **AgPd, AuPd and AuPt nanoalloys with Ag- or Au-rich compositions: Modeling chemical ordering and optical properties**

Nicola Danielis,<sup>1</sup> Lorena Vega,<sup>2</sup> Giovanna Fronzoni,<sup>1</sup> Mauro Stener,<sup>1\*</sup> Albert Bruix,<sup>2</sup> and Konstantin M. Neyman<sup>2,3\*</sup>

<sup>1</sup> *Dipartimento di Scienze Chimiche e Farmaceutiche, Università di Trieste, via L. Giorgieri 1, I-34127, Trieste, Italy*

<sup>2</sup> *Departament de Ciència del Materials i Química Física & Institut de Química Teòrica i Computacional, Universitat de Barcelona, 08028 Barcelona, Spain*

<sup>3</sup> *ICREA (Institució Catalana de Recerca i Estudis Avançats), 08010 Barcelona, Spain*

**Table S1.** Mean values of the bond lengths Ax-Ax, Ax-Px and Px-Px (in pm) in 201-atomic nanoparticles (NPs) AxPx (Ax = Ag, Au; Px = Pd, Pt) calculated using PBE and PBEsol xc-functionals.

| Particle                           | Homotop         | Ax-Ax |        |                   | Ax-Px |        |                   | Px-Px |        |                   |
|------------------------------------|-----------------|-------|--------|-------------------|-------|--------|-------------------|-------|--------|-------------------|
|                                    |                 | PBE   | PBEsol | diff <sup>a</sup> | PBE   | PBEsol | diff <sup>a</sup> | PBE   | PBEsol | diff <sup>a</sup> |
| Ag <sub>158</sub> Pd <sub>43</sub> | L1 <sub>1</sub> | 287.5 | 281.5  | 6.1               | 287.2 | 281.7  | 5.5               | 286.3 | 280.6  | 5.7               |
| Au <sub>158</sub> Pd <sub>43</sub> | L1 <sub>1</sub> | 286.9 | 281.7  | 5.2               | 288.0 | 283.0  | 5.0               | 286.4 | 281.1  | 5.3               |
| Au <sub>158</sub> Pt <sub>43</sub> | L1 <sub>1</sub> | 287.1 | 282.0  | 5.1               | 291.5 | 286.5  | 5.1               | 281.2 | 277.3  | 3.9               |

<sup>a</sup> diff = bond\_lenght(PBE) - bond\_lenght(PBEsol)

**Table S2.** Topological energy energy descriptors  $\epsilon$  (meV) calculated by fitting PBE and PBEsol energies of 20 homotops of 201-atomic AxPx particles.

| Particle                           | xc-functional | $\epsilon_{\text{BOND}}^{\text{Ax-Px}}$ | $\epsilon_{\text{CORNER}}^{\text{Ax}}$ | $\epsilon_{\text{EDGE}}^{\text{Ax}}$ | $\epsilon_{\text{TERRACE}}^{\text{Ax}}$ |
|------------------------------------|---------------|-----------------------------------------|----------------------------------------|--------------------------------------|-----------------------------------------|
| Ag <sub>158</sub> Pd <sub>43</sub> | PBE           | -11                                     | -387                                   | -406                                 | -107                                    |
|                                    | PBEsol        | -11                                     | -433                                   | -431                                 | -119                                    |
| Au <sub>158</sub> Pd <sub>43</sub> | PBE           | -29                                     | -403                                   | -419                                 | -216                                    |
|                                    | PBEsol        | -31                                     | -410                                   | -420                                 | -236                                    |
| Au <sub>158</sub> Pt <sub>43</sub> | PBE           | +14                                     | -574                                   | -533                                 | -280                                    |
|                                    | PBEsol        | +13                                     | -622                                   | -548                                 | -310                                    |

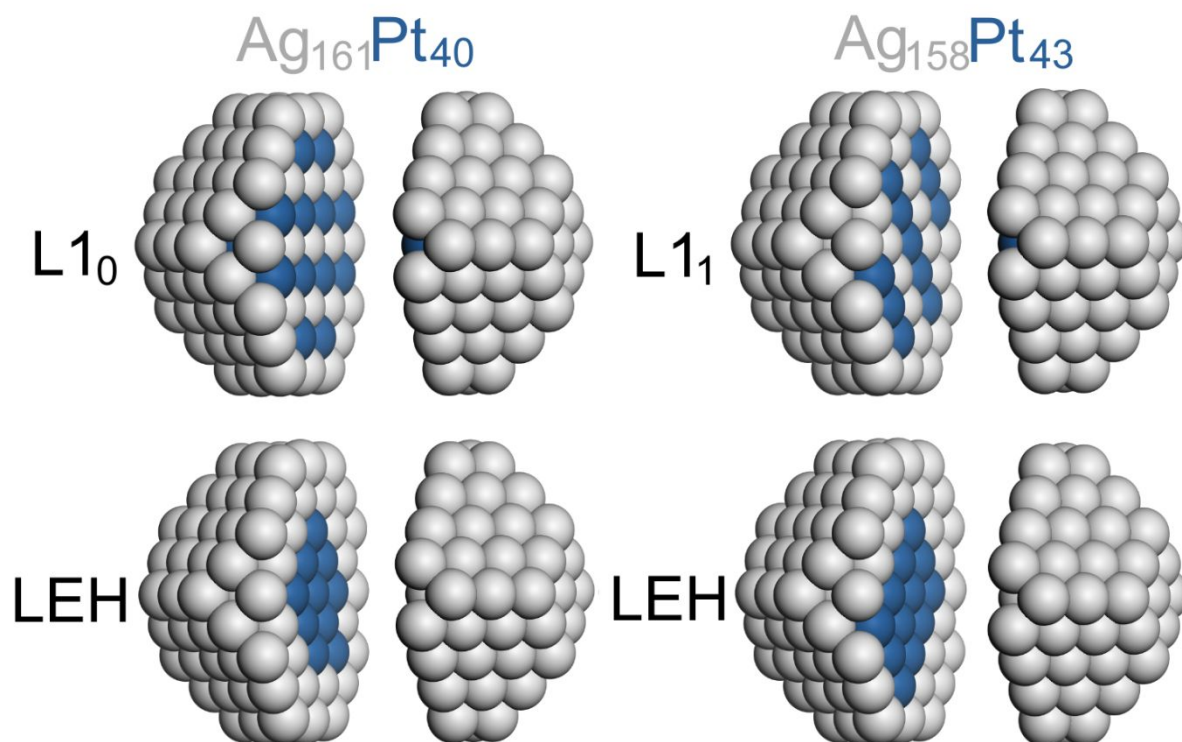

**Figure S1.** Sketches of 201-atomic AgPt NPs with different atomic orderings. The structures are calculated in *J. Phys. Chem. C* **2019**, *123*, 25482; doi: 10.1021/acs.jpcc.9b07382. The images are split to show inner parts of the NPs. Ag atoms – grey; Pt atoms – dark blue.

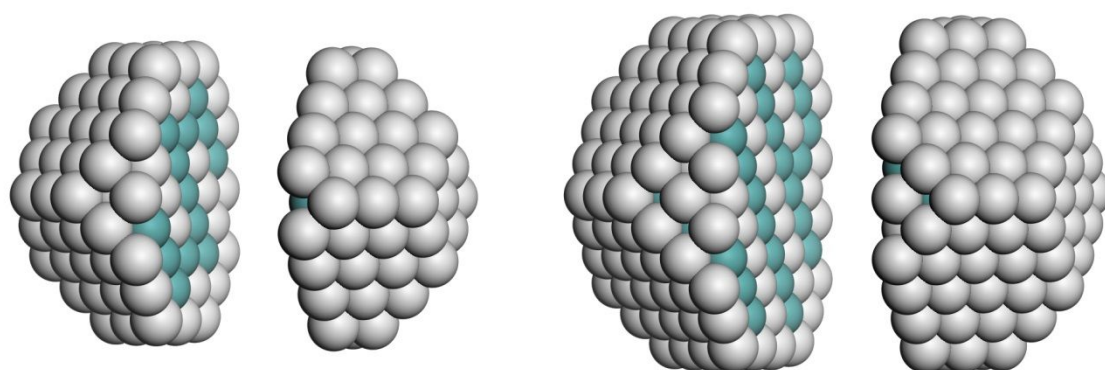

**Figure S2.** Quasi-perfect inner-atoms layered orderings  $qL1_1$  of  $\text{Ag}_{158}\text{Pd}_{43}$  (left panel) and  $\text{Ag}_{295}\text{Pd}_{110}$  (right panel) nanoparticles. Ag atoms – grey; Pd atoms – blue.

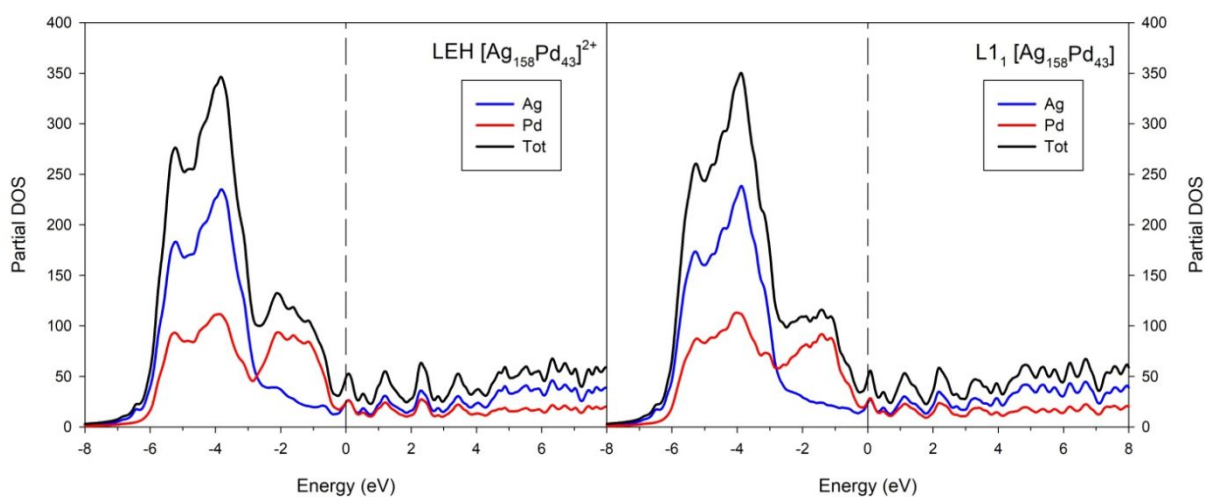

**Figure S3.** Comparison between the PDOS plots of  $[\text{Ag}_{158}\text{Pd}_{43}]^n$  NPs with different chemical orderings

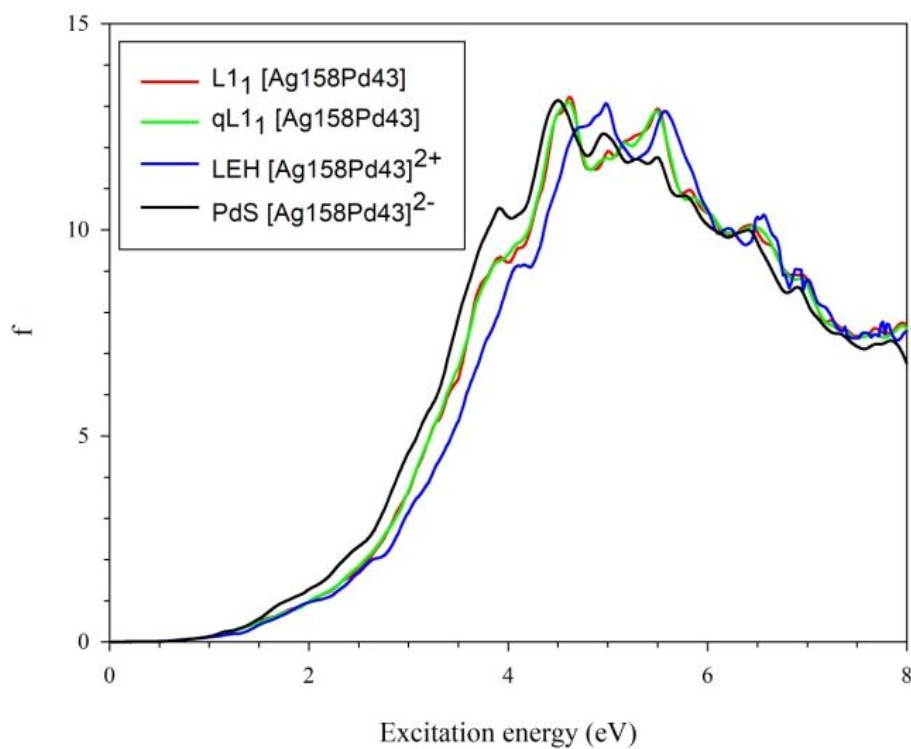

**Figure S4.** Comparison between optical spectra of the closed-shell  $\text{Ag}_{158}\text{Pd}_{43}$  NPs with different chemical orderings

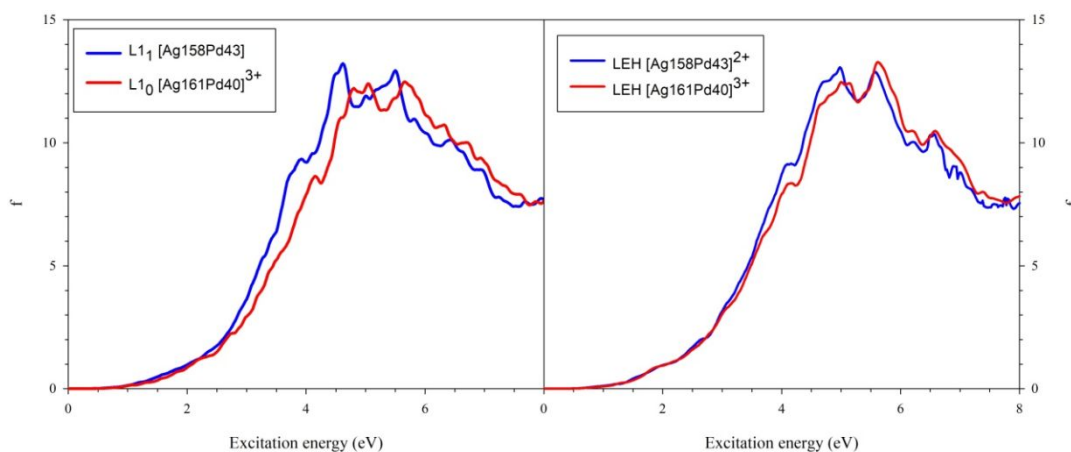

**Figure S5.** Comparison between the optical spectra of the closed-shell  $\text{Ag}_{158}\text{Pd}_{43}$  and  $\text{Ag}_{161}\text{Pd}_{40}$  NPs with different chemical orderings

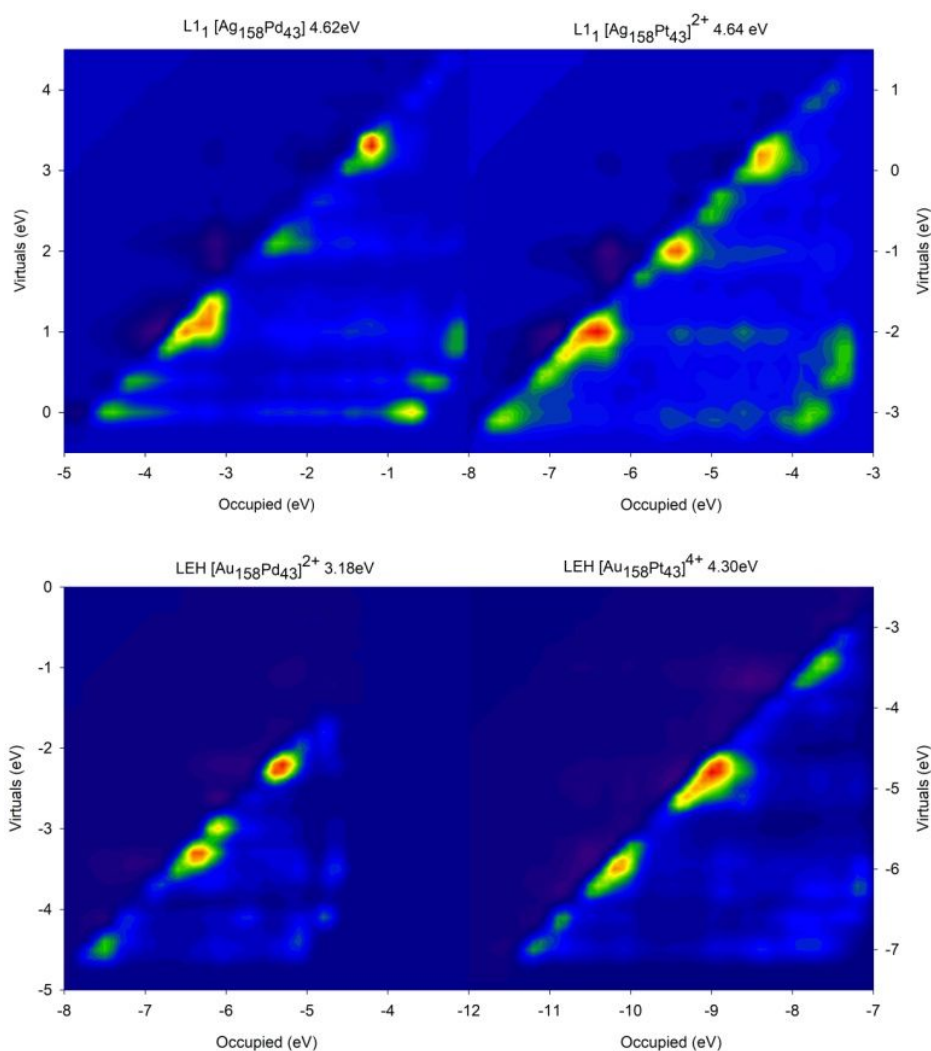

**Figure S6.** Second set of ICM-OS plots of the closed-shell  $\text{Ag}_{158}\text{Pd}_{43}$ ,  $[\text{Ag}_{158}\text{Pt}_{43}]^{2+}$ ,  $[\text{Au}_{158}\text{Pd}_{43}]^{2+}$  and  $[\text{Au}_{158}\text{Pt}_{43}]^{4+}$  NPs, corresponding to the peak position indicated by the central arrow for each color in Figure 6. The excitonic energy of the analyzed peak is given above each plot.

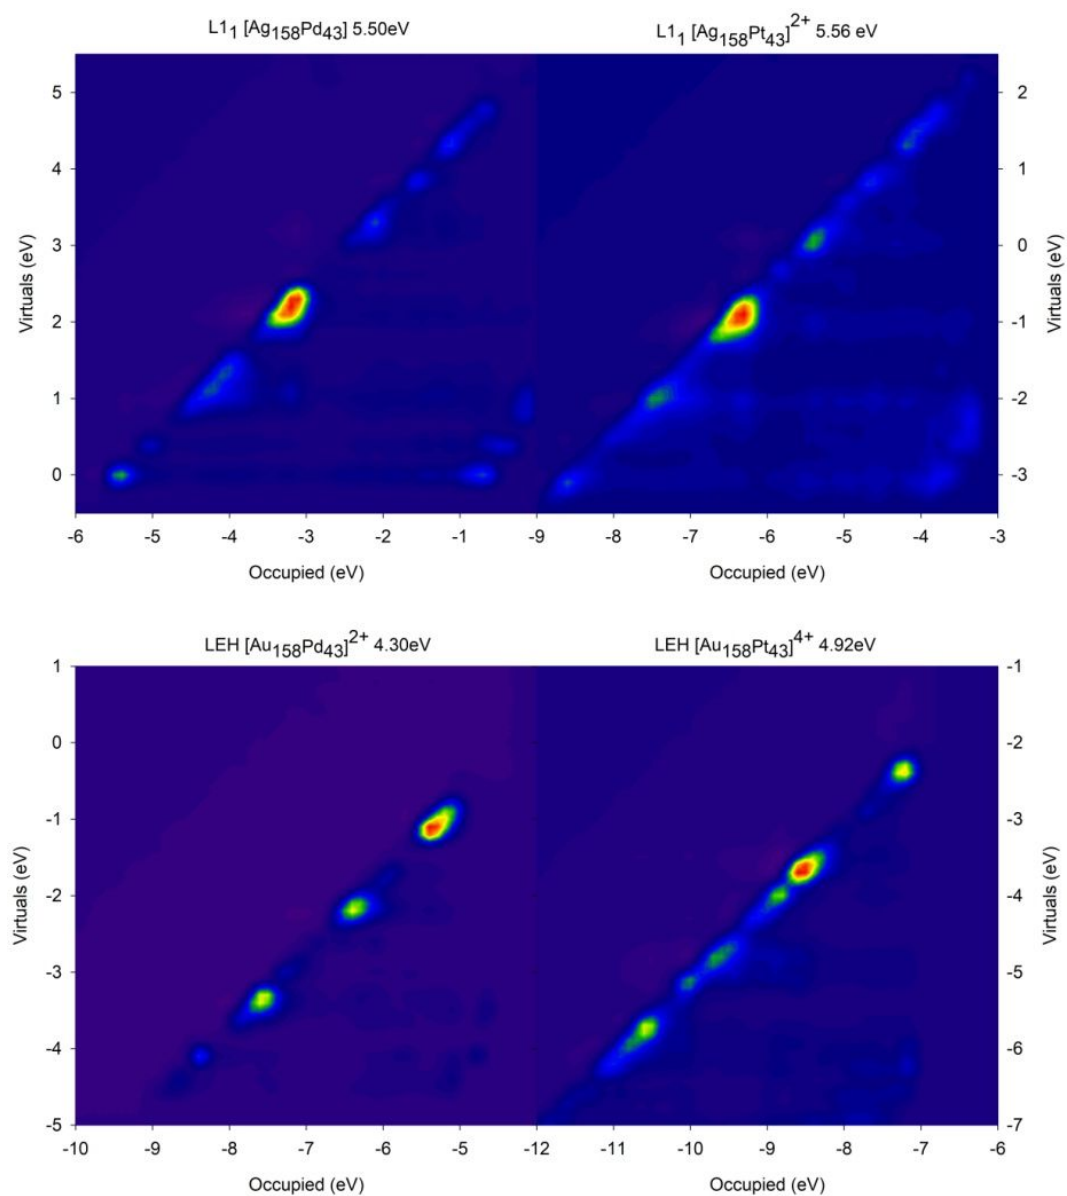

**Figure S7.** Third set of ICM-OS plots of the closed-shell  $\text{Ag}_{158}\text{Pd}_{43}$ ,  $\text{Ag}_{158}\text{Pt}_{43}$ ,  $\text{Au}_{158}\text{Pd}_{43}$  and  $\text{Au}_{158}\text{Pt}_{43}$  NPs, corresponding to the peak position indicated by the right-most arrow for each color in Figure 6. The excitonic energy of the analyzed peak is given above each plot.

**DFT/PBE atomic coordinates (in Å) in the homotops of the AxPx  
(Ax = Au, Ag; Px = Pd, Pt) nanoparticles presented in Table 2**

**Pd<sub>40</sub>Ag<sub>161</sub>L1<sub>0</sub>-606.998**

|    |                   |                   |                   |
|----|-------------------|-------------------|-------------------|
| Ag | 14.51180935664417 | 14.51191806331107 | 4.40121720775623  |
| Ag | 12.50000728695835 | 6.40395934079597  | 18.57233001245677 |
| Ag | 8.42229584355976  | 10.44658246474951 | 18.59022210979660 |
| Ag | 12.49997529226201 | 4.39420940932568  | 16.54134951975988 |
| Ag | 20.60537066652045 | 12.50013101789234 | 16.54135042377021 |
| Ag | 10.48802359965782 | 14.51186725884602 | 20.59882402577399 |
| Ag | 10.44675644556651 | 18.61723419846138 | 16.55160334149416 |
| Ag | 20.66640276682324 | 14.51833087275328 | 14.51607789104139 |
| Ag | 20.66643248769578 | 10.48179104847789 | 14.51617436129113 |
| Ag | 10.48827309160322 | 14.51188324947584 | 4.40113920372259  |
| Ag | 10.44665401145130 | 8.42229631451465  | 18.59005214292345 |
| Ag | 4.33360165397038  | 14.51821596056526 | 14.51593009860748 |
| Ag | 14.55313492523030 | 6.38268507849326  | 16.55185421757911 |
| Ag | 6.38282513279885  | 10.44682937468835 | 16.55187384574214 |
| Ag | 12.50000236474587 | 6.40398646392043  | 6.42758625583631  |
| Ag | 14.55333637363153 | 16.57778000992306 | 18.58998577118878 |
| Ag | 14.5182458889090  | 4.33358698428939  | 10.48426581468381 |
| Ag | 6.35755618100231  | 8.39845509461185  | 14.54928952591431 |
| Ag | 14.55315540287967 | 6.38276870518917  | 8.44841830883194  |
| Ag | 10.48161322666963 | 20.66642277813965 | 10.48392372267249 |
| Ag | 8.39836017790793  | 6.35760797663685  | 10.45090122219860 |
| Ag | 10.44668638516893 | 16.57765114809558 | 6.40979574340402  |
| Ag | 18.64244922920278 | 8.39838452556785  | 14.54933755654224 |
| Ag | 14.51826719749399 | 20.66640263615977 | 14.51587493366769 |
| Ag | 6.38297859199348  | 14.55325235028962 | 8.44801012376314  |
| Ag | 6.36889570719435  | 6.36900761397054  | 12.50000854232691 |
| Ag | 8.39837627912906  | 18.64235830840815 | 14.54910177525922 |
| Ag | 18.63100625851481 | 6.36901065960735  | 12.50022712632067 |
| Ag | 6.40416774481271  | 12.49996686898381 | 6.42722987561578  |
| Ag | 18.64235576311787 | 16.60171267920142 | 14.54918656978656 |
| Ag | 16.57325046819157 | 8.42678515356841  | 16.53593848646930 |
| Ag | 6.38282313724913  | 10.44677385375506 | 8.44806585019092  |
| Ag | 6.35761214126972  | 16.60155947584958 | 10.45062676532108 |
| Ag | 16.57318246591253 | 16.57345647734490 | 16.53580532139391 |
| Ag | 14.55316247695520 | 18.61729367342663 | 16.55169348669020 |
| Ag | 16.60166716978596 | 6.35761311932336  | 10.45099636381835 |
| Ag | 12.49987422450542 | 4.27941802997733  | 12.50017346039568 |
| Ag | 10.48174183488536 | 20.66640683796878 | 14.51591035377129 |
| Ag | 14.51837141729215 | 4.33355800720260  | 14.51599774848532 |
| Ag | 12.50008737736760 | 12.49993354623718 | 4.37805300180953  |
| Ag | 8.39836400223201  | 18.64242453852798 | 10.45077194733785 |
| Ag | 10.44677304238884 | 6.38284002210996  | 8.44833605055438  |
| Ag | 12.49992770431861 | 20.72047056409293 | 12.49986343751357 |
| Ag | 18.64236566453204 | 8.39835588058676  | 10.45089753385339 |
| Ag | 10.44662818447608 | 8.42234157504032  | 6.41010451439527  |
| Ag | 16.60167137545939 | 6.35746043659129  | 14.54925442703209 |
| Ag | 14.51201202660559 | 10.48801981322823 | 4.40122006551760  |
| Ag | 14.55339155742386 | 8.42224291131044  | 6.41011677204234  |
| Ag | 18.63107233370780 | 18.63117171021839 | 12.49988851899174 |
| Ag | 6.35758193410600  | 16.60147653636832 | 14.54912199074871 |
| Ag | 16.60165254180676 | 18.64245244476897 | 14.54903073570501 |
| Ag | 18.61708240215082 | 14.55320138056667 | 8.44813260386218  |
| Ag | 10.48826339359891 | 10.48801284713444 | 20.59886602221422 |
| Ag | 6.35768034972875  | 8.39842025707168  | 10.45071051517197 |
| Ag | 8.42673209260401  | 8.42679364928556  | 16.53593264905647 |
| Ag | 18.64235161088142 | 16.60162803828519 | 10.45069113938896 |

Ag 18.59580900887617 12.50009129905448 18.57273897481734  
 Ag 14.51204506549199 14.51196165531385 20.59883480797139  
 Ag 8.42234245456250 10.44660410822697 6.40973141218461  
 Ag 14.51173672386025 10.48805947596050 20.59882109434546  
 Ag 4.33358237954266 14.51828655853444 10.48373236799542  
 Ag 16.60157403732088 18.64246452978900 10.45080009741372  
 Ag 4.33355576356892 10.48171672802507 10.48389642253279  
 Ag 12.49998537365515 18.59607866039709 18.57251141602412  
 Ag 16.57773085707982 10.44654585828281 6.40982754983958  
 Ag 8.42235658554735 14.55336025708162 18.59028823438681  
 Ag 10.44659226751073 16.57769804107791 18.59000070828124  
 Ag 20.66638204338240 10.48169184790324 10.48408842362834  
 Ag 4.27959211047264 12.49998516783439 12.49979057123972  
 Ag 14.55319778392934 18.61709943553170 8.44821767637343  
 Ag 16.57766498366259 14.55339704915510 6.40977579588556  
 Ag 6.36898647645855 18.63110002280034 12.49982944577731  
 Ag 6.40410713636038 12.49996339461788 18.57270728603041  
 Ag 18.61706910184486 10.44693647638770 16.55189462490178  
 Ag 8.39828468091946 6.35759884714723 14.54910131263620  
 Ag 4.33351819845838 10.48178003977310 14.51601538133452  
 Ag 8.42668946634541 8.42654138395449 8.46414100047062  
 Ag 10.48165734296446 4.33360684590138 10.48415594408294  
 Ag 20.72036333908606 12.50001168759873 12.50009801606014  
 Ag 16.57316101619996 16.57325533935257 8.46403140514214  
 Ag 20.66639850296973 14.51830165402109 10.48393606142809  
 Ag 16.57340037732878 8.42649253545077 8.46423170763229  
 Ag 18.59580604544908 12.49989762787082 6.42733024636911  
 Ag 18.61724544822510 10.44670632058827 8.44815327944115  
 Ag 10.48158913445490 4.33348346662504 14.51603004613161  
 Ag 18.61732089643792 14.55329495262248 16.55196163908837  
 Ag 6.38281460401430 14.55322096024590 16.55183610538681  
 Ag 8.42676111322042 16.57324812140067 8.46402386624023  
 Ag 16.57765439238977 10.44659484872822 18.59011670180413  
 Ag 14.51835622505575 20.66638637726348 10.48390203472519  
 Ag 8.42237531169006 14.55338979290993 6.40971764057811  
 Ag 14.55337249661822 16.57762869903029 6.40985486686076  
 Ag 14.55346495367597 8.42233389470423 18.58999456874416  
 Ag 10.44680418501634 6.38285613200530 16.55180843541648  
 Ag 12.50003176460787 12.49998082119937 20.62195622264192  
 Ag 16.57771011143447 14.55349433621160 18.59028996122572  
 Ag 10.48805470733140 10.48809431832026 4.40126743677190  
 Ag 10.44681258834674 18.61722575446770 8.44816472185658  
 Ag 8.42653895540415 16.57346999022856 16.53579616774691  
 Ag 12.49997331934120 18.59590929177547 6.42741941649659  
 Ag 16.52395657506080 12.50007248189816 20.55270053668289  
 Ag 12.50004213612572 8.47557378479352 4.44773991173363  
 Ag 16.52396694688052 12.49985951614196 4.44735033900248  
 Ag 6.37153788047973 10.48542325703592 12.49994551591639  
 Ag 12.49975401660405 16.58804323137257 12.49986279882302  
 Ag 12.50008580897490 8.47564798649778 20.55243086536122  
 Ag 20.63293328182388 16.58050839501247 12.49997701090161  
 Ag 12.49995369473335 20.60545282207836 8.45870539262640  
 Ag 18.62836647350260 14.51477749610400 12.50000059650629  
 Ag 12.49991010423737 16.52441943518658 20.55241965344061  
 Ag 12.49997841895087 4.39434949549702 8.45881317720464  
 Ag 16.57182904426899 16.57161877362645 12.49999406896152  
 Ag 10.48078075476660 14.51943765142520 16.51567270841995  
 Ag 8.43243779666435 12.49991006366331 16.49447438808805  
 Ag 16.58047863159208 20.63326085472945 12.49983429669297  
 Ag 20.60522932291873 12.49993569202250 8.45885868879251  
 Ag 4.39462402742868 12.50003586783590 16.54121504194673  
 Ag 10.45384911184279 10.45426284322684 12.50024731159397



Ag 8.41951646243516 20.63320536854632 12.49983433190437  
 Ag 12.49984222776744 12.50032231859864 16.53038293826826  
 Ag 10.48537091016595 6.37145425634555 12.50012920519971  
 Ag 12.50012131640875 12.49989007474978 12.50012883130430  
 Ag 14.54629495395311 14.54593416876396 12.50007352385569  
 Ag 12.50006049270030 8.41196396650309 12.50021097425953  
 Ag 4.36704031605265 16.58046275473274 12.49983378846273  
 Ag 14.54604491142671 10.45421908799499 12.50007246577153  
 Ag 14.51923716874258 10.48067873225360 8.48452743594715  
 Ag 14.51461509949580 6.37156488631148 12.50017078294862  
 Ag 12.50000085860236 12.49971653211755 8.46967731427829  
 Ag 10.48535102957877 18.62844745578397 12.49994189986605  
 Ag 12.49996010964665 8.43244940550675 16.49440340945397  
 Ag 12.50006341571674 16.52415163295919 4.44740404033536  
 Ag 12.49990390513925 20.60571087905228 16.54108298519023  
 Ag 16.58761142164034 12.50017382945898 12.50004889216718  
 Ag 8.47600494396344 12.50001950775531 20.55281105035350  
 Ag 16.56756443649027 12.49999907919810 8.50562846994153  
 Ag 12.50005872072364 16.56731890174915 16.49424561803337  
 Ag 16.56757644736304 12.49989773508035 16.49451708965409  
 Ag 10.45386709774027 14.54615303513340 12.49987022847193  
 Ag 8.43254120533062 12.50011008439912 8.50558151113396  
 Ag 10.48045289894347 10.48074710605538 16.51556756441116  
 Ag 10.48051786458302 14.51934470315427 8.48445194861350  
 Ag 6.37143588854956 14.51468965632339 12.49992842812540  
 Ag 4.39474412078615 12.49989337391413 8.45867448894997  
 Ag 12.50006426774319 16.56741151803135 8.50572487959533  
 Ag 14.51917695846366 14.51963416443719 16.51556912134400  
 Ag 16.58062339164775 4.36675320148919 12.50020274908385  
 Ag 14.51459214522483 18.62868716296588 12.49988326640916  
 Ag 14.51957053663017 10.48060290415286 16.51575603716478  
 Ag 18.62856028668947 10.48532557643827 12.50010082833009  
 Ag 16.57177378276743 8.42833749646899 12.50014603231906  
 Ag 8.41942364182044 4.36681442785291 12.50016548521860  
 Ag 10.48086637357575 10.48072071058822 8.48441707938350  
 Ag 8.42834076893677 16.57153131628290 12.50000523297194  
 Ag 8.42822470877065 8.42841662499052 12.50005862004396  
 Ag 14.51954250340945 14.51952326831480 8.48432241331546  
 Ag 20.63299029242108 8.41950721786234 12.50020597059902  
 Ag 12.49997712124308 8.43267792779224 8.50582991514547  
 Ag 8.47605681922160 12.49995167406363 4.44725019253243  
 Ag 8.41212581293120 12.49994187259385 12.49991787174656  
 Ag 4.36695241327004 8.41956860934804 12.49998556961076  
 Pd 14.53878367286364 12.50010890208310 14.50299839963234  
 Pd 16.58600724868985 14.55047181070096 10.47242122963653  
 Pd 18.66279948482058 12.49998570184255 10.46344156842824  
 Pd 8.41398585468578 10.44965660025531 14.52755200854861  
 Pd 6.33722619848003 12.49990639821591 10.46334397652133  
 Pd 12.49996938682800 14.52526000730352 18.60192246713518  
 Pd 14.52525273239013 12.49995259683983 6.39781095408424  
 Pd 14.52532504901888 12.50001588935348 18.60223067277862  
 Pd 12.49988601009560 10.46146976872484 14.50300774472341  
 Pd 12.49993661030345 6.33722846582750 10.46380676749998  
 Pd 12.50004996691580 14.53883103835790 14.50332063822261  
 Pd 10.44963364815401 16.58588058218031 10.47244949408689  
 Pd 18.66286223730922 12.50007113190062 14.53666998397922  
 Pd 10.44944172047135 16.58608684286951 14.52734513432792  
 Pd 10.46114839136448 12.49990642327768 14.50313807314052  
 Pd 10.47473114151483 12.50003521651258 18.60217756790295  
 Pd 14.55045035345484 16.58604951908936 10.47226910283852  
 Pd 6.33715011938681 12.50004724892158 14.53651505677837  
 Pd 14.55043234354585 8.41393451208707 14.52758021149554

|    |                   |                   |                   |
|----|-------------------|-------------------|-------------------|
| Pd | 12.49999319224589 | 18.66274436270713 | 10.46351750518536 |
| Pd | 14.55044474121424 | 8.41399808683003  | 10.47261462468616 |
| Pd | 10.44953384149204 | 8.41396017532285  | 10.47256141733033 |
| Pd | 12.50008548090483 | 14.52529623047269 | 6.39771674362223  |
| Pd | 12.49994789182550 | 14.53886479452435 | 10.49668132474929 |
| Pd | 16.58604208420159 | 14.55059217775068 | 14.52736261559077 |
| Pd | 12.49992956508256 | 18.66289657618679 | 14.53629814132881 |
| Pd | 12.50001138554247 | 10.47465123466142 | 18.60226916893636 |
| Pd | 16.58603476477584 | 10.44966836138405 | 14.52771075600376 |
| Pd | 14.53894671945943 | 12.49985248523566 | 10.49696446466751 |
| Pd | 10.44952356064923 | 8.41406252994822  | 14.52754920038840 |
| Pd | 8.41374126363811  | 14.55050087236285 | 14.52740959564227 |
| Pd | 12.49998860202491 | 10.47482946789767 | 6.39813889173051  |
| Pd | 10.47481381734418 | 12.49993578553337 | 6.39777140129445  |
| Pd | 12.50012683597317 | 10.46132929369530 | 10.49680145601305 |
| Pd | 12.49998711695618 | 6.33726855646791  | 14.53650506396481 |
| Pd | 8.41384770110194  | 10.44963759435010 | 10.47256001183176 |
| Pd | 8.41404107873067  | 14.55043506831002 | 10.47223762019503 |
| Pd | 16.58609295209687 | 10.44960790329224 | 10.47254461274852 |
| Pd | 14.55055466442995 | 16.58609340958003 | 14.52755405681697 |
| Pd | 10.46113390180209 | 12.50001868232334 | 10.49673536370124 |

**Pd<sub>40</sub>Ag<sub>161</sub>LEH-606.586**

|    |                   |                   |                   |
|----|-------------------|-------------------|-------------------|
| Pd | 8.47495725194395  | 12.58416397684666 | 16.66501210817239 |
| Pd | 14.58310776358015 | 12.60263003676233 | 14.64868562288645 |
| Pd | 10.49213970893531 | 16.69259223825999 | 14.63848915639302 |
| Pd | 12.52856750834918 | 8.50132426684119  | 8.53546203375618  |
| Pd | 18.65856583622162 | 12.58277674798770 | 14.61808839964610 |
| Pd | 8.47884680222667  | 12.58103015220892 | 8.56276835841693  |
| Pd | 10.49392590873357 | 16.69629934413355 | 10.55187736454310 |
| Pd | 14.58182217039687 | 16.69902609725166 | 10.55169825118150 |
| Pd | 8.47764990018812  | 8.49165303166922  | 12.59172913013810 |
| Pd | 14.58466539191872 | 8.51095690160479  | 14.64814902542970 |
| Pd | 14.55755274633955 | 12.57929730286503 | 18.76133503751124 |
| Pd | 10.50813972945972 | 12.58044817364860 | 6.49198965818971  |
| Pd | 10.50416068385296 | 12.60123226890959 | 10.57959607507058 |
| Pd | 12.53250810869395 | 14.63267055344384 | 18.77353380719212 |
| Pd | 6.42170179513771  | 12.58219507576975 | 14.62194590102084 |
| Pd | 6.40767920930688  | 10.53486048994500 | 12.59274792887635 |
| Pd | 12.52835372022242 | 6.42567506687655  | 14.67195119473722 |
| Pd | 18.66272408605067 | 12.58390837075091 | 10.56686586262173 |
| Pd | 14.57996995856964 | 12.59099651556867 | 10.57605527610185 |
| Pd | 18.67740687996171 | 10.54013309492936 | 12.58500787606608 |
| Pd | 14.58231149315360 | 16.69751511504530 | 14.63513594654900 |
| Pd | 6.41956939017859  | 12.58062527382261 | 10.57754266634266 |
| Pd | 12.52909574997130 | 18.78134365186078 | 14.64645671049601 |
| Pd | 16.59530242195965 | 12.58611381838819 | 8.55160806928543  |
| Pd | 6.40835890004866  | 14.63500174922090 | 12.59234878208925 |
| Pd | 10.50246191815424 | 12.60083781976713 | 14.64802559462521 |
| Pd | 10.51424556535203 | 8.51705364709014  | 10.55973122129793 |
| Pd | 12.52867934214910 | 10.53685182823953 | 6.46612196185323  |
| Pd | 16.59713097336398 | 12.58805740377228 | 16.66856189688075 |
| Pd | 10.48716157566739 | 8.50972711887695  | 14.65653533269130 |
| Pd | 10.50603681775644 | 12.57569836011084 | 18.75578843539425 |
| Pd | 12.53138613270585 | 18.79585583138186 | 10.52093302636970 |
| Pd | 8.47347206715183  | 16.71112276722927 | 12.58762157290567 |
| Pd | 12.51775980667961 | 6.43401483539521  | 10.53639819041015 |
| Pd | 14.55739546870482 | 12.58559572120468 | 6.48339986670828  |
| Pd | 12.53109607280818 | 14.64482319687990 | 6.46661873807214  |
| Pd | 18.67187364532136 | 14.63913910317866 | 12.58909348677002 |
| Pd | 16.60115364174997 | 16.71685085964952 | 12.58328714886909 |
| Pd | 12.53049049515138 | 10.53382958463146 | 18.78380576170416 |

|    |                   |                   |                   |
|----|-------------------|-------------------|-------------------|
| Pd | 16.60809612617222 | 8.49300787495396  | 12.59796086899128 |
| Ag | 20.59940558824886 | 8.50142571219970  | 12.57896453797295 |
| Ag | 16.53433365190750 | 12.57441880538521 | 4.52273759688728  |
| Ag | 10.51302560097979 | 4.40712129548882  | 10.57989524342280 |
| Ag | 10.50603971875825 | 10.57107584963918 | 16.68757301267641 |
| Ag | 12.53989779506463 | 12.59313525970938 | 16.74832396048074 |
| Ag | 18.62674507874305 | 16.69255424340336 | 14.61568745097757 |
| Ag | 12.54403397807132 | 14.64626464111831 | 14.64427496768400 |
| Ag | 10.48286505550152 | 18.75655521825877 | 8.50917313753707  |
| Ag | 10.49646115312829 | 14.66862436649039 | 12.60545142866720 |
| Ag | 10.51533336366184 | 18.74596571786999 | 12.57912464254212 |
| Ag | 18.62681430847836 | 14.62684857736274 | 16.65561135919533 |
| Ag | 10.51403535296816 | 6.46881291207449  | 12.59465362622677 |
| Ag | 14.57139087787445 | 6.44609703159300  | 16.67233619736714 |
| Ag | 12.53114091893029 | 10.55540262750046 | 10.57157431950169 |
| Ag | 16.57949840716729 | 20.80578253655551 | 12.56730714572979 |
| Ag | 8.46745882402749  | 8.47958257321248  | 8.52814588865044  |
| Ag | 10.50135342032830 | 6.47480348669618  | 8.54583024252629  |
| Ag | 14.54904861716286 | 6.45695411443435  | 12.61312295306479 |
| Ag | 16.59272085414986 | 8.47262862566465  | 16.67896118291866 |
| Ag | 12.52507651268629 | 18.76972305716335 | 6.45820789458419  |
| Ag | 16.65104966359714 | 12.59599644503279 | 12.60040385023435 |
| Ag | 14.56790469915220 | 10.57195809420995 | 16.68994448697822 |
| Ag | 10.48434768501883 | 18.74888570750786 | 16.65819890544337 |
| Ag | 16.58609285739525 | 14.62350003541662 | 18.71344165433540 |
| Ag | 14.56817153870596 | 8.48923349708484  | 6.50127378630471  |
| Ag | 18.59989951148306 | 12.57894059036982 | 6.53712726561491  |
| Ag | 20.62269271249382 | 12.57554191357678 | 8.58564178052196  |
| Ag | 12.52430027323451 | 4.45343930069609  | 16.66313559480750 |
| Ag | 10.48098017251921 | 16.70279559299828 | 18.72895825776316 |
| Ag | 16.59371789233927 | 16.71171040543572 | 16.67268581005002 |
| Ag | 18.60512066956675 | 6.43655071765509  | 12.58563603487664 |
| Ag | 8.46721844396210  | 18.73838020010816 | 14.61009669442553 |
| Ag | 8.47024332066377  | 10.53666633404549 | 6.51822405071788  |
| Ag | 8.46852839773916  | 10.53224956551436 | 18.70988026282831 |
| Ag | 12.53489811721889 | 8.50039407747731  | 16.66093223355174 |
| Ag | 12.52296929621510 | 4.39650162101185  | 12.58683795967719 |
| Ag | 14.53565348854533 | 10.54487742953085 | 20.75415636479233 |
| Ag | 10.52101005287364 | 20.79180182244863 | 14.58747668998707 |
| Ag | 6.44109880491933  | 16.68589139408899 | 14.61635606479320 |
| Ag | 12.53906239024007 | 12.59685516909411 | 8.49269795800600  |
| Ag | 8.47305344151311  | 14.62680993599169 | 14.62161558590829 |
| Ag | 12.52340465211710 | 8.49009377293969  | 20.71114721227531 |
| Ag | 20.64707718364586 | 10.55004949527087 | 14.59586959522378 |
| Ag | 6.43540577452027  | 10.53124728607175 | 8.55050575114845  |
| Ag | 12.54067688672062 | 10.56300351710410 | 14.65692632323160 |
| Ag | 6.43734731217116  | 14.62178409713816 | 8.54730120975159  |
| Ag | 10.50838500463650 | 14.61154518351312 | 16.68544971657956 |
| Ag | 16.60758102100711 | 10.56166954486557 | 10.57391172061612 |
| Ag | 4.46953857163049  | 8.49956136169898  | 12.58444441433156 |
| Ag | 12.52702679025348 | 12.57554051133006 | 20.76997382530756 |
| Ag | 10.52282528794781 | 4.41624585467381  | 14.59986279100107 |
| Ag | 12.52025193188139 | 6.45989172235325  | 6.50573957580631  |
| Ag | 18.62499546185047 | 8.48322004160756  | 10.54355311611091 |
| Ag | 16.60641688994609 | 14.63192733813337 | 14.62188295427272 |
| Ag | 16.58755901533989 | 14.62763103017674 | 6.50172888773272  |
| Ag | 8.47058822721437  | 20.79442012063849 | 12.56885906201243 |
| Ag | 12.53503184668950 | 16.70845739813999 | 8.55718811235531  |
| Ag | 6.44021944820001  | 16.68584065773560 | 10.54974287619279 |
| Ag | 14.52116324225675 | 4.40243684845735  | 14.60944284678795 |
| Ag | 10.51762488505550 | 14.60019321964308 | 20.73337798079500 |
| Ag | 14.54976751449142 | 18.75068857940288 | 12.57757316909894 |

Ag 14.53100448202171 14.60693076560812 4.49515303830022  
 Ag 8.47184112831883 14.61795571705010 18.70353003544797  
 Ag 8.47559202671345 14.62878836726460 10.58096911216913  
 Ag 4.44780455571842 12.57397030553612 16.59519866300014  
 Ag 10.47740785905932 8.47125277585776 18.74169787327560  
 Ag 8.47185414902920 14.61664355452418 6.52020259581355  
 Ag 14.53098640281959 10.55579036749958 4.49155272906217  
 Ag 10.48389340157858 6.44588824274875 16.67445430588083  
 Ag 16.59301970863799 18.74502911769249 14.61136129995717  
 Ag 8.47410043900836 10.55708289848945 14.62554004293660  
 Ag 16.60943371483532 10.56026626083216 14.62786640479278  
 Ag 12.53593138445625 16.69893622616994 16.65000929962369  
 Ag 18.60827361540570 18.75651900968832 12.57504373050989  
 Ag 8.43557513402951 12.59327153413679 12.60493412777183  
 Ag 8.50594159221417 12.56836183751691 20.70316298006651  
 Ag 12.52453939235021 16.66899542969403 20.69414018530954  
 Ag 16.59257681179515 6.45024118856734 14.63005187313085  
 Ag 4.43827677759967 12.57097644572058 8.60892371054760  
 Ag 10.51858109833792 10.56238447791017 8.54777457892072  
 Ag 14.57721414440783 16.70753549057727 18.73482888650981  
 Ag 4.42373231040164 10.55244312374613 14.59359256567759  
 Ag 18.59817320216234 12.57208692561751 18.67266211017839  
 Ag 14.57877910700094 16.71296850015692 6.47085191677803  
 Ag 6.44388673847727 8.48787902651991 14.62217573991481  
 Ag 12.53881306761228 16.75185788197172 12.59368700910967  
 Ag 10.49807651467228 10.53985319496787 12.61622520744788  
 Ag 10.48907835412481 8.49447057672157 6.49885465293986  
 Ag 20.64664590550588 14.61389080288843 10.57270983841464  
 Ag 12.52615144722665 18.76081665942389 18.72148330233043  
 Ag 14.58664076242483 10.54965359660504 12.62652099915618  
 Ag 14.52502533162993 4.42509600854410 10.58142785579681  
 Ag 12.52240327162831 20.75360213235056 8.50180593969348  
 Ag 20.64203314407634 14.60787832510458 14.59920051166772  
 Ag 16.59401655235370 18.75197943080845 10.54164422347015  
 Ag 12.52012714669896 4.45123256815805 8.54199756173047  
 Ag 8.51035920835039 12.57564721425389 4.53566445315731  
 Ag 8.47787438292073 4.40986509759844 12.58053793933585  
 Ag 14.52629953557903 20.81099602103885 10.56085521878949  
 Ag 14.58919160495677 14.66844880298555 12.60348726070477  
 Ag 14.55974906146994 6.45727930069123 8.52294482465454  
 Ag 14.57321159704101 18.76232509891792 8.50900253356266  
 Ag 16.59157985037122 10.53434685961904 6.50299638753291  
 Ag 12.54389082956758 14.64543376586424 10.57524092663541  
 Ag 18.63105317638984 8.48625097396651 14.62544559663101  
 Ag 6.44047289631710 8.48588020696955 10.55407493976646  
 Ag 12.52269999058953 6.42667848047414 18.73257338223307  
 Ag 12.52478443708796 20.73926555802656 16.64691338987033  
 Ag 10.51775884315078 14.60074479504094 4.50630119427452  
 Ag 14.56940139799524 14.61569332792457 16.68505918132064  
 Ag 10.47926679150901 16.71024768093136 6.47535258290752  
 Ag 8.46865877782056 6.45620584765110 14.62035406064795  
 Ag 16.62613030961010 8.45419322016422 8.48889384775228  
 Ag 14.52512628890724 20.79284541899935 14.58361724095149  
 Ag 16.56978700159558 4.40390914808876 12.59202018908907  
 Ag 20.65037228871018 12.58397430661466 12.58590309965993  
 Ag 18.62937617896859 10.53089521896212 16.65742105764211  
 Ag 8.48033686063897 10.55371573009512 10.58684503733512  
 Ag 8.46654859510363 18.74205163926401 10.54373823752385  
 Ag 14.57398599512670 18.75250068952082 16.65822075998016  
 Ag 4.42575535589338 14.60541533969297 14.59650195977038  
 Ag 16.60557056957843 14.63224453357778 10.57451862072235  
 Ag 18.62811420846992 16.69441858637454 10.54574662397875

|    |                   |                   |                   |
|----|-------------------|-------------------|-------------------|
| Ag | 12.52452688317728 | 20.83928937821973 | 12.57368177906256 |
| Ag | 18.63625065831638 | 10.53034574797469 | 8.53188131877344  |
| Ag | 4.46986044604514  | 16.65545789710740 | 12.57970277525419 |
| Ag | 16.58864873364381 | 10.53442215672401 | 18.71641910356708 |
| Ag | 12.52540683586935 | 8.46114008554021  | 12.63735042382533 |
| Ag | 14.53071569160251 | 14.60281624691122 | 20.74571999439756 |
| Ag | 10.50961608065323 | 14.61767684294773 | 8.53997539275921  |
| Ag | 12.52763286428907 | 12.58013725081653 | 4.48805474716815  |
| Ag | 6.45190621055134  | 12.57460253110495 | 6.55731842273978  |
| Ag | 6.45311335071119  | 6.43938834878170  | 12.58406975823349 |
| Ag | 20.66099536588492 | 10.54816826271582 | 10.57668221107558 |
| Ag | 6.45010914885610  | 18.74665028693716 | 12.57481503752015 |
| Ag | 14.57861982723615 | 8.47137282994351  | 18.74444044369032 |
| Ag | 16.60925645484916 | 6.43312740428673  | 10.54149707925893 |
| Ag | 6.43774341273702  | 14.62451916042110 | 16.64918990213824 |
| Ag | 12.54194637780174 | 12.60320105391834 | 12.61278680801087 |
| Ag | 6.45590533029215  | 12.56936949376116 | 18.66233163934055 |
| Ag | 16.59224555198045 | 16.71614988425567 | 8.51027928013453  |
| Ag | 20.60160121601819 | 16.66355344999818 | 12.57589762216499 |
| Ag | 8.46561952499282  | 8.47438924811624  | 16.68014419114711 |
| Ag | 18.62924092724752 | 14.63233031756572 | 8.52886965898796  |
| Ag | 8.46973533803354  | 16.70538711366740 | 16.66724093107722 |
| Ag | 4.41895331929305  | 14.60338768416765 | 10.59108303518085 |
| Ag | 4.42872473430303  | 12.57997985036637 | 12.59423756232827 |
| Ag | 12.52328982825727 | 8.51281532856090  | 4.52210406143723  |
| Ag | 14.56607811467370 | 14.61974409632863 | 8.53603010166641  |
| Ag | 10.51275453783089 | 10.54437403670781 | 20.74904520973616 |
| Ag | 12.52560222263040 | 16.65979881398120 | 4.51856814072190  |
| Ag | 10.51928460147724 | 20.80041544572984 | 10.55871581631121 |
| Ag | 8.47274178931562  | 6.45802877912462  | 10.55611554160667 |
| Ag | 4.41488221958743  | 10.54767959688896 | 10.59392988793337 |
| Ag | 20.61521539588042 | 12.57374177774221 | 16.60320401186862 |
| Ag | 10.51525655624856 | 10.55733362936117 | 4.49635316971096  |
| Ag | 14.55618608806994 | 8.50314539720554  | 10.56842002832702 |
| Ag | 14.55690161948242 | 10.56742753852730 | 8.53361521939006  |
| Ag | 6.43581543003276  | 10.53003264768820 | 16.65287018469885 |
| Ag | 8.46971677493215  | 16.70746025675356 | 8.51626933536843  |
| Ag | 16.54142161003945 | 12.57054915019492 | 20.71282215250130 |

**Pd<sub>105</sub>Ag<sub>300</sub>L<sub>10</sub>-1310.065**

|    |                    |                   |                  |
|----|--------------------|-------------------|------------------|
| Pd | 11.94476355466328  | 11.94474129822546 | 5.85397119884356 |
| Pd | 14.00001263105661  | 9.90181175403067  | 5.84792654874422 |
| Pd | 16.05526865009502  | 11.94473036288152 | 5.85397356180705 |
| Pd | 9.90182219990625   | 13.99999544228532 | 5.84791503457670 |
| Pd | 11.94477255923914  | 16.05523529725946 | 5.85399727234025 |
| Pd | 14.00003079797826  | 13.99998236888075 | 5.87366825682907 |
| Pd | 16.05526917257195  | 16.05525710231879 | 5.85397276707967 |
| Pd | 18.09818299527251  | 13.99999295327208 | 5.84792778968097 |
| Pd | 14.00000789936137  | 18.09819206579468 | 5.84790785813948 |
| Pd | 11.94418959768411  | 7.87537214539756  | 9.91783438554047 |
| Pd | 14.00002014726944  | 5.81103267093751  | 9.92311309435221 |
| Pd | 16.05585670599476  | 7.87535116612419  | 9.91780877271460 |
| Pd | 7.87534616479388   | 11.94415261379266 | 9.91782697503615 |
| Pd | 9.90453524968961   | 9.90452837669195  | 9.91626535215687 |
| Pd | 11.96425393864626  | 11.96421902663857 | 9.91636414009168 |
| Pd | 14.00004827504953  | 9.90918457400608  | 9.93143464460738 |
| Pd | 16.03580111444647  | 11.96421369290391 | 9.91633824260058 |
| Pd | 18.09547450262657  | 9.90451042862998  | 9.91623605062160 |
| Pd | 20.124611120297488 | 11.94415592143370 | 9.91780995083183 |
| Pd | 5.81100339544507   | 13.99999867247818 | 9.92308337761105 |
| Pd | 7.87530721462983   | 16.05584025001563 | 9.91783363562988 |
| Pd | 9.90917687957845   | 13.99997556508996 | 9.93146856305384 |

Pd 11.96425545619645 16.03577031659913 9.91641519143470  
Pd 14.00002929545022 13.9999998070883 9.89653484833657  
Pd 16.03579878099830 16.03577070334331 9.91635655373640  
Pd 18.09081015502498 13.99998162364242 9.93142758822704  
Pd 20.12461917936192 16.05582378667172 9.91781865784419  
Pd 22.18892614423494 13.99998845461418 9.92309102998678  
Pd 9.90451604519375 18.09549370286929 9.91625922907139  
Pd 11.94418000579869 20.12469234130073 9.91783501428072  
Pd 14.00005474496873 18.09084386287273 9.93146103624674  
Pd 16.05585634373538 20.12466963313362 9.91780824174139  
Pd 18.09547155664303 18.09548616816357 9.91624924689154  
Pd 14.00002420532621 22.18900180863437 9.92310162155465  
Pd 7.88760743920877 7.88763235768522 13.99999412649924  
Pd 9.93186152155277 5.82071177079713 13.99999311267403  
Pd 11.97020466552894 7.89540381354082 13.99999154412056  
Pd 14.00004443890601 5.82458912087006 13.99999116700438  
Pd 16.02988645217402 7.89538622713531 13.99999640870038  
Pd 18.06816093532426 5.82068759269425 13.99997488487337  
Pd 20.11228771365877 7.88765373568457 13.99999010393291  
Pd 5.82061407822657 9.93172491021987 13.99999277306181  
Pd 7.89534257809023 11.97011738486828 13.99999149838806  
Pd 9.92381156241883 9.92376729776505 13.99998939477796  
Pd 11.97215844099604 11.97205567767491 13.99998408894068  
Pd 14.00007325040776 9.93020047817155 13.99998947882345  
Pd 16.02794639574762 11.97208016820364 14.00000132859362  
Pd 18.07621086752996 9.92377543842337 14.00000061262778  
Pd 20.10458116552853 11.97011543377532 14.00000473823082  
Pd 22.17924221511948 9.93182697392458 13.99999070479347  
Pd 5.82450037040889 13.99998993567086 13.99999520102543  
Pd 7.89529147075196 16.02988862762943 13.99999971101441  
Pd 9.93018182400174 13.99998178226384 13.99999132326428  
Pd 11.97213088938779 16.02792610947606 14.00000411758357  
Pd 14.00006652081489 13.99998076773982 14.00000326529306  
Pd 16.02796699241648 16.02788454507058 14.00002184371071  
Pd 18.06979227697695 13.99996438875636 14.00001170238312  
Pd 20.10457304882713 16.02983036079663 14.00000856653204  
Pd 22.17533061042613 13.99997059087251 14.00000036026904  
Pd 5.82057486830013 18.06831047112578 13.99998901590419  
Pd 7.88750593779889 20.11249388132688 13.99998181625657  
Pd 9.92374032856209 18.07628578539766 14.00000572566592  
Pd 11.97013921548489 20.10471876591230 13.99999913021153  
Pd 14.00005904207549 18.06985032464731 14.00001350743736  
Pd 16.02988995271601 20.10466061924127 14.00001201303988  
Pd 18.07621985144829 18.07621048662269 14.00002343433427  
Pd 20.11231234296655 20.11235583608873 14.00001108512362  
Pd 22.17926796654433 18.06810863567907 14.00000371099280  
Pd 9.93169720454102 22.17940342616470 13.99999078077822  
Pd 14.00002326273853 22.17550119808342 13.99999292451231  
Pd 18.06822358492603 22.17935857904470 14.00000235986079  
Pd 11.94419561647088 7.87535258596335 18.08214589703235  
Pd 14.00002110158877 5.81103031460075 18.07687455501135  
Pd 16.05585806293104 7.87533819464473 18.08218658845536  
Pd 7.87533099331734 11.94415220935346 18.08215796922381  
Pd 9.90453310712191 9.90452263919905 18.08370171547876  
Pd 11.96426384296701 11.96421433450677 18.08362014494652  
Pd 14.00005915077470 9.90916467930006 18.06854637625487  
Pd 16.03581497796769 11.96420529468624 18.08367618616609  
Pd 18.09548308270745 9.90450600803095 18.08377928775607  
Pd 20.12463463619880 11.94414787666970 18.08221710415649  
Pd 5.81098172521715 13.99999328336511 18.07688043955153  
Pd 7.87529498479603 16.05583598272302 18.08216389498386  
Pd 9.90917066280684 13.99996964794410 18.06851503667860

|    |                   |                   |                   |
|----|-------------------|-------------------|-------------------|
| Pd | 11.96425822615553 | 16.03576787754670 | 18.08359355001189 |
| Pd | 14.00003644031426 | 13.99999110153321 | 18.10349329134596 |
| Pd | 16.03581609065935 | 16.03577468082325 | 18.08367811453587 |
| Pd | 18.09083446952805 | 13.99997524945656 | 18.06860129058100 |
| Pd | 20.12463901680317 | 16.05582732581782 | 18.08221910061253 |
| Pd | 22.18894750801373 | 13.99998673656514 | 18.07693018692678 |
| Pd | 9.90450643888921  | 18.09550689005609 | 18.08373746758505 |
| Pd | 11.94416160064630 | 20.12471329742634 | 18.08217291245547 |
| Pd | 14.00005608353187 | 18.09086176036824 | 18.06855360180838 |
| Pd | 16.05586246388198 | 20.12468726278433 | 18.08220579481813 |
| Pd | 18.09549659781630 | 18.09549941417432 | 18.08378472766164 |
| Pd | 13.99998850368183 | 22.18901789392419 | 18.07690509366588 |
| Pd | 11.94475666223156 | 11.94472896387943 | 22.14600056765750 |
| Pd | 14.00001114773967 | 9.90178857372702  | 22.15206173724908 |
| Pd | 16.05528648803391 | 11.94471218439119 | 22.14605016360542 |
| Pd | 11.94477141778858 | 16.05523282612320 | 22.14598224819849 |
| Pd | 14.00004438313500 | 13.99998081650939 | 22.12632614157222 |
| Pd | 16.05527150139786 | 16.05528809611132 | 22.14598553836226 |
| Pd | 18.09819914355334 | 13.99998819565332 | 22.15213163991265 |
| Pd | 14.00001274151691 | 18.09819560108890 | 22.15208591179046 |
| Pd | 9.90181004172526  | 14.00000194161062 | 22.15206718759467 |
| Ag | 14.00001574343454 | 5.85128665654899  | 5.85363747759565  |
| Ag | 14.00002097236777 | 7.92402494254314  | 3.87736433104932  |
| Ag | 16.06720693469405 | 7.85307147077517  | 5.82961666364975  |
| Ag | 7.85308846219557  | 11.93281138682176 | 5.82956772122096  |
| Ag | 9.89395635433065  | 9.89393338692838  | 5.82546081563216  |
| Ag | 9.95022073516558  | 11.98126558830550 | 3.85996598803851  |
| Ag | 11.98129368449043 | 9.95019106708919  | 3.85997456255177  |
| Ag | 14.00003520519092 | 11.97922426065238 | 3.87890376878023  |
| Ag | 16.01875553418338 | 9.95016746445752  | 3.86000384958439  |
| Ag | 18.10608488329962 | 9.89390584694563  | 5.82546350080986  |
| Ag | 18.04981181845092 | 11.98123930742110 | 3.86001061608414  |
| Ag | 20.14690266696901 | 11.93279736339425 | 5.82960707096934  |
| Ag | 5.85119552446049  | 13.99997787044185 | 5.85352119158895  |
| Ag | 7.92401607423535  | 13.99998876217029 | 3.87732813103948  |
| Ag | 7.85309663724663  | 16.06714446102697 | 5.82962285665269  |
| Ag | 9.95020792623938  | 16.01872213402116 | 3.85999686258927  |
| Ag | 11.97928075041055 | 13.99998347402512 | 3.87890195441048  |
| Ag | 14.00003483712796 | 16.02074375096904 | 3.87891170630849  |
| Ag | 16.02078397787155 | 13.99998355695923 | 3.87891354309857  |
| Ag | 18.04981464945901 | 16.01872528202822 | 3.85999653901535  |
| Ag | 20.07593672655985 | 13.99997762888431 | 3.87733906663755  |
| Ag | 20.14690958537860 | 16.06716970783584 | 5.82958532461006  |
| Ag | 22.14870024518708 | 13.99997752994919 | 5.85364793151397  |
| Ag | 9.89398568991144  | 18.10601490046668 | 5.82554249167295  |
| Ag | 11.98127427663340 | 18.04978808647069 | 3.85998653498895  |
| Ag | 11.93285519581094 | 20.14689288370209 | 5.82962005074590  |
| Ag | 14.00001625873957 | 20.07595931885930 | 3.87729416137025  |
| Ag | 16.01875356959315 | 18.04980727651760 | 3.85998215037915  |
| Ag | 16.06717758069690 | 20.14690964596387 | 5.82960261041663  |
| Ag | 18.10608587325526 | 18.10607133652800 | 5.82543034572293  |
| Ag | 14.00001404432098 | 22.14876054519850 | 5.85349014892120  |
| Ag | 11.97392965493045 | 3.81928797029474  | 9.92674866516313  |
| Ag | 13.99998011567241 | 3.87046008348758  | 7.90666246773704  |
| Ag | 16.02608968732924 | 3.81928224285533  | 9.92669409560851  |
| Ag | 7.86430457096978  | 7.86428886354576  | 9.89805751509854  |
| Ag | 9.89715257269578  | 5.81752320107708  | 9.89182656826990  |
| Ag | 9.90723009457713  | 7.86988426067069  | 7.88604578431844  |
| Ag | 11.93956058280773 | 5.83976826759581  | 7.88070819889774  |
| Ag | 14.00003307915291 | 7.88017609983022  | 7.94196430660663  |
| Ag | 16.06046474556955 | 5.83972684255131  | 7.88068351522380  |
| Ag | 18.10287490059751 | 5.81748244126222  | 9.89182441682501  |

Ag 18.09281610898247 7.86984319544326 7.88603578855280  
 Ag 20.13569295738460 7.86426745483406 9.89804575066481  
 Ag 3.81927435656877 11.97388476803936 9.92668501051441  
 Ag 5.81749087710824 9.89708354597239 9.89180143396733  
 Ag 5.83974641567521 11.93951584593735 7.88063233470505  
 Ag 7.86989350042612 9.90718493973788 7.88602788514840  
 Ag 9.92226756707774 11.96026384701004 7.91822699512193  
 Ag 11.96030589394398 9.92225340396502 7.91824760800413  
 Ag 14.00004189976246 11.95503648605656 7.88821207606623  
 Ag 16.03975985514809 9.92223572801530 7.91824038202307  
 Ag 18.07775126186936 11.96024992296025 7.91824624109726  
 Ag 20.13012362643082 9.90718024858023 7.88604259323768  
 Ag 22.18244300427418 9.89712237129561 9.89184570632747  
 Ag 22.16022716707588 11.93953991088140 7.88068989076611  
 Ag 24.18066571214975 11.97388259959931 9.92672146163412  
 Ag 3.87046472591719 13.99997638037907 7.90657527610789  
 Ag 3.81926242306283 16.02608893119374 9.92667349322990  
 Ag 5.83970722643220 16.06046618020276 7.88061352988755  
 Ag 7.88016317578654 13.99997617971876 7.94193186386649  
 Ag 9.92226999246838 16.03969334925732 7.91826495061563  
 Ag 11.95508718381081 13.99997666157661 7.88820960879963  
 Ag 14.00004484891001 16.04493820046296 7.88820231732734  
 Ag 16.04497320635511 13.99998116093477 7.88820067924373  
 Ag 18.07775467791846 16.03971631489138 7.91824189721612  
 Ag 20.11979838966903 13.99997927474146 7.94195074831657  
 Ag 22.16023600494621 16.06041662577018 7.88068098095518  
 Ag 24.12956371331456 13.99997169448496 7.90671042242371  
 Ag 24.18067559943773 16.02607041307170 9.92671949191716  
 Ag 5.81743955484625 18.10291047225272 9.89178919980949  
 Ag 7.86984390205175 18.09281874224875 7.88601491567582  
 Ag 7.86424682499219 20.13575160246995 9.89805029578160  
 Ag 9.90718446863754 20.13015192469997 7.88602874119072  
 Ag 11.96031909930034 18.07773874348020 7.91826605391228  
 Ag 14.00003088383136 20.11985594998212 7.94193185450469  
 Ag 16.03975702669567 18.07774461883340 7.91823052135635  
 Ag 18.09282162483422 20.13012958458427 7.88599618307575  
 Ag 20.13012471705301 18.09277978248392 7.88601443849713  
 Ag 20.13570421241358 20.13569870600216 9.89803375741213  
 Ag 22.18246062245357 18.10284053172358 9.89183162828370  
 Ag 9.89710669839728 22.18255800916187 9.89180335194550  
 Ag 11.93954538514538 22.16027436454589 7.88063766275294  
 Ag 11.97392748428127 24.18075700268233 9.92666571943902  
 Ag 14.00001100191052 24.12948769351610 7.90655407696463  
 Ag 16.06049500383074 22.16028251675494 7.88060548343627  
 Ag 16.02612128775401 24.18073776696993 9.92666085886081  
 Ag 18.10291183772793 22.18250579296654 9.89177540497921  
 Ag 7.95544146966538 3.86083767085052 13.99999615173717  
 Ag 9.92882982157714 3.82919011888338 11.95611659681872  
 Ag 11.97291202545360 3.77889468011508 13.99999341673004  
 Ag 14.00004857829979 3.78954152536477 11.97686964305004  
 Ag 16.02718139730775 3.77889304392812 13.99999696757987  
 Ag 18.07116235191722 3.82913696296083 11.95608144742188  
 Ag 20.04469377564024 3.86080672246539 13.99998482878912  
 Ag 3.86059483495059 7.95533444269124 13.99999710186402  
 Ag 5.88040672465200 5.88042885088980 14.00000502443414  
 Ag 5.84784533941900 7.88008455245134 11.95333470521442  
 Ag 7.88014975676208 5.84790127919424 11.95333010120057  
 Ag 9.93244948941724 7.89176151420140 11.98640401598586  
 Ag 11.97541155387591 5.85771270820529 11.97709855446614  
 Ag 14.00006681248403 7.89296223950857 11.95498834112242  
 Ag 16.02468860204887 5.85769155011023 11.97708958566579  
 Ag 18.06757915771858 7.89177980090657 11.98639040229760



Ag 20.11978182058815 5.84787419972481 11.95334184330262  
 Ag 22.11941411276877 5.88046265199512 13.99999958114153  
 Ag 22.15205778964083 7.88013615556394 11.95332991773401  
 Ag 24.13903155568256 7.95541945458037 14.00000575406847  
 Ag 3.82912785382714 9.92873892633072 11.95607971755930  
 Ag 3.77882588294926 11.97278347228833 13.99999257129483  
 Ag 5.85766588517566 11.97531261613475 11.97709108371346  
 Ag 7.89176558019335 9.93237826362450 11.98640356253318  
 Ag 9.92971881933270 11.96585448634962 11.95633593538440  
 Ag 11.96595178939198 9.92967186522433 11.95632530545167  
 Ag 14.00007130103329 11.97015643594311 11.95533048187133  
 Ag 16.03415669792691 9.92967066194051 11.95632901578774  
 Ag 18.07033043269815 11.96585512766718 11.95632411868962  
 Ag 20.10820072535189 9.93240350148275 11.98639770314746  
 Ag 22.14225386482856 11.97532451483099 11.97708417748847  
 Ag 24.17083138923112 9.92877930482391 11.95611001464024  
 Ag 24.22099065827285 11.97282088150641 13.99998767188137  
 Ag 3.78948945366886 13.99998203253835 11.97685157596989  
 Ag 3.77880167011661 16.02718278769392 13.99999603927244  
 Ag 5.85764128204265 16.02466374268275 11.97709922341241  
 Ag 7.89293779559218 13.99998224792882 11.95498804111742  
 Ag 9.92969744662132 16.03411572719082 11.95633745616366  
 Ag 11.97024509183844 13.99997865527151 11.95534990566060  
 Ag 14.00006797250791 16.02980625258640 11.95536304910378  
 Ag 16.02986487654798 13.99996855325827 11.95533565245158  
 Ag 18.07032984493368 16.03408250093992 11.95633143790529  
 Ag 20.10701499463413 13.99996711039877 11.95499441209497  
 Ag 22.14227447299895 16.02461775734257 11.97708692592704  
 Ag 24.21039666456923 13.99996626154663 11.97687107853458  
 Ag 24.22102072836039 16.02710417792528 13.99999211835873  
 Ag 3.82909203323775 18.07124103616447 11.95607897439977  
 Ag 3.86056763246075 20.04473024243619 13.99999465396385  
 Ag 5.84773177080907 20.11996743516514 11.95331572643669  
 Ag 7.89169208056256 18.06764911501155 11.98641215923252  
 Ag 9.93237032677219 20.10831176677909 11.98640995804922  
 Ag 11.96591986284018 18.07033106305208 11.95634372622392  
 Ag 14.00003890398765 20.10707369937484 11.95499652545410  
 Ag 16.03416492838986 18.07031478029342 11.95634505198822  
 Ag 18.06760706166556 20.10823601981901 11.98639564401677  
 Ag 20.10821231720781 18.06754706554246 11.98640999456460  
 Ag 22.15204869491089 20.11979976540032 11.95333077134673  
 Ag 24.17085095500878 18.07117401344572 11.95610620842911  
 Ag 24.13902660267433 20.04452791238073 14.00000046257822  
 Ag 5.88026674416150 22.11969601386195 13.99998743168128  
 Ag 7.88002973221859 22.15222464997146 11.95330710464997  
 Ag 7.95529992885914 24.13939475259475 13.99999413451629  
 Ag 9.92875479886069 24.17090255248410 11.95608102353963  
 Ag 11.97534977083408 22.14238080874578 11.97708540428932  
 Ag 11.97284148381331 24.22119067336297 13.99998189879234  
 Ag 14.00003779213973 24.21053298330260 11.97684041770380  
 Ag 16.02469988162589 22.14233322030769 11.97708868250878  
 Ag 16.02721774069139 24.22117242549199 13.99998275865416  
 Ag 18.07123843329875 24.17086335687393 11.95606241989893  
 Ag 20.11987211418155 22.15212897783071 11.95332368406677  
 Ag 20.04458748793074 24.13932226234123 13.99999684353864  
 Ag 22.11948526922604 22.11956190976888 13.99999409556691  
 Ag 9.92883288504378 3.82918767522220 16.04387801282196  
 Ag 11.97395265520773 3.81928259859176 18.07327821493102  
 Ag 14.00004417971573 3.78952410051266 16.02312729687016  
 Ag 16.02609883268086 3.81926862813532 18.07329466256943  
 Ag 18.07119815077043 3.82917640285027 16.04390034613265  
 Ag 5.84784350675168 7.88009137053123 16.04666126645914

Ag 7.88015597886369 5.84790483361434 16.04666450117219  
 Ag 7.86430547040235 7.86429226212346 18.10193327840341  
 Ag 9.89715636326224 5.81751003142320 18.10817086080923  
 Ag 9.93245124813889 7.89175476766167 16.01357777582864  
 Ag 11.97540701722520 5.85769571271445 16.02289099069943  
 Ag 14.00006379327306 7.89295687152768 16.04499165091339  
 Ag 16.02467886842068 5.85769977144481 16.02290456847597  
 Ag 18.10288466109396 5.81748691990151 18.10818876141543  
 Ag 18.06758864175916 7.89175809040450 16.01360409388541  
 Ag 20.11981417046170 5.84790266792434 16.04665809293319  
 Ag 20.13569254335714 7.86427933436423 18.10196977549575  
 Ag 22.15201873373362 7.88017470418102 16.04665394804139  
 Ag 3.82912644728029 9.92874278478002 16.04391293396643  
 Ag 3.81926530125310 11.97388807123007 18.07332380855329  
 Ag 5.81748179819282 9.89708942590170 18.10820081401118  
 Ag 5.85765314109094 11.97530087410360 16.02288755335386  
 Ag 7.89175712347741 9.93237745241518 16.01357819898043  
 Ag 9.92971254157545 11.96585370485929 16.04363878043818  
 Ag 11.96595663826104 9.92966292272102 16.04364589752042  
 Ag 14.00007745332293 11.97015685743632 16.04466629344886  
 Ag 16.03416417917899 9.92965681437629 16.04366425200834  
 Ag 18.07033982174388 11.96585904596714 16.04368911584545  
 Ag 20.10819918269351 9.93241437218012 16.01360347113537  
 Ag 22.18246094949500 9.89711948366372 18.10817397731839  
 Ag 22.14226687760108 11.97531787833896 16.02291336359985  
 Ag 24.17082698991610 9.92878263636127 16.04387836954588  
 Ag 24.18067863213844 11.97388970476550 18.07328190332670  
 Ag 3.78946222038569 13.99998054837100 16.02313382670109  
 Ag 3.81924563582784 16.02607848004833 18.07333432570176  
 Ag 5.85762200338667 16.02467165288431 16.02289411616722  
 Ag 7.89293982474284 13.99997982911609 16.04499149363665  
 Ag 9.92968859930696 16.03411453301462 16.04366348041887  
 Ag 11.97025187690036 13.99997298348849 16.04464632265897  
 Ag 14.00007163177828 16.02980401441755 16.04467612209278  
 Ag 16.02986430329199 13.99996775960029 16.04470331092992  
 Ag 18.07034698100152 16.03408536650860 16.04370998071883  
 Ag 20.10702986727028 13.99995754720717 16.04503407266175  
 Ag 22.14227170403836 16.02462030994401 16.02291927799555  
 Ag 24.21039946224473 13.99997218910288 16.02311374571810  
 Ag 24.18068261986922 16.02606141057919 18.07327667812856  
 Ag 3.82908352431179 18.07123772480191 16.04392180562866  
 Ag 5.81742585859195 18.10291214914914 18.10819598808100  
 Ag 5.84779212676350 20.11993054331075 16.04661927543922  
 Ag 7.89169309561326 18.06764039230491 16.01359910011791  
 Ag 7.86423188038644 20.13576131398304 18.10194765867889  
 Ag 9.93236358219688 20.10832402376766 16.01358867036521  
 Ag 11.96591706656852 18.07034661177104 16.04367080190914  
 Ag 14.00004046519444 20.10708564494958 16.04501702502976  
 Ag 16.03417241508747 18.07032577343542 16.04369043255189  
 Ag 18.06762195733841 20.10825366438914 16.01363421957201  
 Ag 20.10822606793840 18.06756425083920 16.01362639472135  
 Ag 20.13573111040272 20.13572204255775 18.10198462358976  
 Ag 22.18248936065888 18.10284484188118 18.10817906236344  
 Ag 22.15206946072353 20.11981345653966 16.04667895546078  
 Ag 24.17086043228804 18.07116829740062 16.04389045140371  
 Ag 7.88003371214472 22.15223615841517 16.04668375059903  
 Ag 9.89709884133644 22.18256993744616 18.10820587057153  
 Ag 9.92875904649143 24.17089883657242 16.04389951175413  
 Ag 11.97534057862902 22.14238194212001 16.02288844768464  
 Ag 11.97392061164282 24.18075301475312 18.07332093625686  
 Ag 14.00003699393791 24.21053640231376 16.02312907277120  
 Ag 16.02468929632268 22.14235072916306 16.02292323444347

Ag 16.02610478179038 24.18073884690035 18.07332925917295  
 Ag 18.10291973752279 22.18254015872167 18.10822324854433  
 Ag 18.07123756348046 24.17087386511517 16.04392306871727  
 Ag 20.11988726092856 22.15214609295775 16.04668010978304  
 Ag 14.00002420845130 3.87056073709532 20.09339201993010  
 Ag 9.90723713876145 7.86988168463262 20.11394351265252  
 Ag 11.93955379451794 5.83975760226325 20.11931177495348  
 Ag 11.93283931816828 7.85308039004339 22.17037681731152  
 Ag 14.00001617173522 5.85127408709700 22.14644728792333  
 Ag 14.00002283328137 7.88015096903520 20.05802893029167  
 Ag 16.06049707947042 5.83972387322746 20.11932588752469  
 Ag 16.06717348527319 7.85307604067726 22.17033423998406  
 Ag 18.09282515240167 7.86983474417590 20.11398232553862  
 Ag 5.83972406308044 11.93953334759501 20.11936969397703  
 Ag 7.86989649052851 9.90718533607139 20.11396045773278  
 Ag 7.85310144102276 11.93284120995356 22.17036906014276  
 Ag 9.89395810432010 9.89392877876128 22.17451843823830  
 Ag 9.92226461554785 11.96025296463554 20.08172619112552  
 Ag 11.96029938987364 9.92223533238444 20.08170937478397  
 Ag 14.00005100056788 11.95502352234353 20.11179384239308  
 Ag 16.03976961902647 9.92222209245537 20.08175099158733  
 Ag 18.10608001305784 9.89389760741023 22.17455923586748  
 Ag 18.07776995456219 11.96023038169475 20.08178733067522  
 Ag 20.13014283389179 9.90716657670646 20.11399997668984  
 Ag 20.14690072939596 11.93281477547972 22.17038819426787  
 Ag 22.16026819893347 11.93953910092259 20.11934514974044  
 Ag 3.87047368618721 13.99997311190298 20.09343420552260  
 Ag 5.85118258660693 13.99998668866724 22.14652147881057  
 Ag 5.83969537547605 16.06044532997305 20.11938366437617  
 Ag 7.88013449479833 13.99998138945882 20.05804636947524  
 Ag 7.85310240557008 16.06713928346738 22.17036993817720  
 Ag 11.93283844848480 7.85309587118446 5.82961752305714  
 Ag 9.92225860007818 16.03970430819565 20.08170753777018  
 Ag 11.95508252020057 13.99996992415483 20.11179300093906  
 Ag 14.00005298224222 16.04494002914378 20.11179919901608  
 Ag 16.04499994428138 13.99997367603201 20.11182143369863  
 Ag 18.07777646746438 16.03972575968042 20.08179859807756  
 Ag 20.11982249758132 13.99997403724823 20.05806863571502  
 Ag 20.14690641993505 16.06714400705612 22.17040284013131  
 Ag 22.14872888912223 13.99997699327038 22.14641459426342  
 Ag 22.16026973264537 16.06041203955144 20.11934163141592  
 Ag 24.12958506821457 13.99997220832848 20.09333015896525  
 Ag 7.86983398979184 18.09281964353935 20.11397641960674  
 Ag 9.89397992129328 18.10601745733165 22.17444236814444  
 Ag 9.90717419620333 20.13017107143502 20.11399624983677  
 Ag 11.96030441318572 18.07775843604524 20.08172139720070  
 Ag 11.93285213612630 20.14691623614016 22.17038641551339  
 Ag 14.00002554179114 20.11987649935629 20.05807303771218  
 Ag 16.03977500321593 18.07776634347141 20.08178718469317  
 Ag 16.06717609786847 20.14691308009662 22.17039930077011  
 Ag 18.10608741841240 18.10606668250972 22.17458399923811  
 Ag 18.09284813351320 20.13015280774825 20.11402610600589  
 Ag 20.13015870245597 18.09279673587757 20.11401726422572  
 Ag 11.93953788731945 22.16030337276398 20.11939974146212  
 Ag 14.00002635470241 22.14881066327269 22.14651183383996  
 Ag 14.00002739404842 24.12952689332943 20.09343891101744  
 Ag 16.06048194162675 22.16028762844744 20.11937809834147  
 Ag 14.00001870890596 7.92401414625008 24.12262855198702  
 Ag 9.95022322919758 11.98126177179004 24.13997308188944  
 Ag 11.98129350157331 9.95017609907693 24.13997355850433  
 Ag 14.00002928303089 11.97920376003477 24.12105594022826  
 Ag 16.01873930891556 9.95013888898479 24.13998661221911

|    |                   |                   |                   |
|----|-------------------|-------------------|-------------------|
| Ag | 18.04980775557201 | 11.98122934131897 | 24.14003725560839 |
| Ag | 7.92403987007900  | 13.99998511652663 | 24.12267772536441 |
| Ag | 9.95022517063811  | 16.01871827762452 | 24.13997751408798 |
| Ag | 11.97928562947927 | 13.99997511514151 | 24.12105136265657 |
| Ag | 14.00002985533582 | 16.02074421202812 | 24.12109093271142 |
| Ag | 16.02077846679560 | 13.99997576109697 | 24.12110113628381 |
| Ag | 18.04981211163576 | 16.01872312302032 | 24.14006329203344 |
| Ag | 20.07593708296826 | 13.99997294595134 | 24.12269246567609 |
| Ag | 11.98128200917939 | 18.04979348850502 | 24.13995812895626 |
| Ag | 14.00001058519727 | 20.07597839926301 | 24.12266350711985 |
| Ag | 16.01873921995627 | 18.04981622743930 | 24.14002146840248 |

**Pd<sub>105</sub>Ag<sub>300</sub>LEH-1311.749**

|    |                   |                   |                   |
|----|-------------------|-------------------|-------------------|
| Pd | 13.99430747005812 | 9.89713960202321  | 5.82289624747368  |
| Pd | 16.04746831016970 | 11.94796948205325 | 5.83298571002103  |
| Pd | 9.90589946745590  | 14.00391138111094 | 5.83046575118397  |
| Pd | 11.95423412997714 | 16.05632952575797 | 5.85120987512868  |
| Pd | 14.00445807152686 | 14.01433445780278 | 5.85243518994428  |
| Pd | 16.06210937614328 | 16.05938596944569 | 5.83132752085711  |
| Pd | 18.10579887481410 | 14.00181206892760 | 5.83365298773912  |
| Pd | 13.98844900193470 | 18.08403898000453 | 5.85445321226040  |
| Pd | 14.00537779861430 | 5.82760282946942  | 9.91051591088351  |
| Pd | 14.00018291648446 | 7.86926315001244  | 7.86669588433065  |
| Pd | 9.90686224072172  | 9.90068443913224  | 9.89934673380588  |
| Pd | 9.90750883566920  | 11.94079973060482 | 7.88569330610520  |
| Pd | 13.99586656595868 | 9.90737142774124  | 9.89450903456713  |
| Pd | 18.10235958688042 | 9.89420633320152  | 9.90101158230579  |
| Pd | 5.82766436785695  | 13.99989632140947 | 9.90465245929078  |
| Pd | 7.87760902696412  | 16.05188767909364 | 9.90435245931075  |
| Pd | 9.91293144530677  | 14.00451413692937 | 9.91356905448405  |
| Pd | 13.99994073507249 | 14.01364893224019 | 9.91144002870496  |
| Pd | 16.04397006871549 | 16.04352648327775 | 9.90642364621534  |
| Pd | 18.09689039001720 | 14.00979959400174 | 9.89874486304773  |
| Pd | 20.13172625296759 | 14.00036910328401 | 7.87412951296238  |
| Pd | 22.16351119509908 | 13.99974661807643 | 9.90487251486408  |
| Pd | 9.90016121500411  | 18.09417403569859 | 9.90617424483455  |
| Pd | 11.96300881156933 | 18.09281802695338 | 7.87406657555717  |
| Pd | 14.00148996047642 | 18.08600261369141 | 9.90598738384071  |
| Pd | 13.99767034452977 | 20.09311343403879 | 7.87972559646620  |
| Pd | 18.10565084095522 | 18.09891593825311 | 9.89861726645348  |
| Pd | 14.00212052868422 | 22.14886185914442 | 9.90794231447858  |
| Pd | 9.91068101738277  | 5.83913124353278  | 14.00854419694285 |
| Pd | 11.94032516311572 | 5.82915167066721  | 11.94312729768065 |
| Pd | 16.07044728412355 | 5.84573000720160  | 11.95399182477657 |
| Pd | 18.09556329273400 | 5.85014941770725  | 13.99353545891869 |
| Pd | 18.09914328718442 | 7.85905470062435  | 11.94798957487536 |
| Pd | 20.12272301538944 | 7.87286070842503  | 14.00258631035554 |
| Pd | 5.81807641243953  | 9.89981010611258  | 13.99979177252163 |
| Pd | 7.87859449947407  | 9.90084946550060  | 11.94218661253086 |
| Pd | 9.90612055106019  | 9.91087483800652  | 13.99775983880754 |
| Pd | 11.96495265318242 | 9.90931740353992  | 11.95350192099439 |
| Pd | 14.00823501190249 | 9.89039994532386  | 13.99498144960131 |
| Pd | 18.09393648982595 | 11.97481504431580 | 11.94629451291463 |
| Pd | 22.14128654319355 | 9.87952232932686  | 14.00653450221327 |
| Pd | 22.15770882402600 | 11.93694679496873 | 11.93766247876450 |
| Pd | 5.84107888655705  | 13.99565125604549 | 14.02129556790137 |
| Pd | 5.83469680640653  | 16.03424679334131 | 11.92738508798499 |
| Pd | 9.90220356792748  | 13.99813287861676 | 14.00261356853288 |
| Pd | 11.94880030054824 | 14.00322264688220 | 11.94930130889141 |
| Pd | 13.99987380671211 | 14.00973227749228 | 13.99163653946720 |
| Pd | 16.04971963534555 | 16.04810028699162 | 14.00396705919439 |
| Pd | 18.10563410981595 | 13.98758151567122 | 13.99611860940999 |

Pd 22.12558512177089 14.00561801110374 13.99583103964517  
Pd 22.15419148533381 16.06136528281360 11.94531428737885  
Pd 5.83102791059049 18.09672806199990 14.00171293931805  
Pd 7.86279428515098 20.12062912827546 13.99856866215030  
Pd 9.89510724658921 18.09911635892569 13.99547584133894  
Pd 11.96197940184418 18.09594442831044 11.97235274364448  
Pd 14.00641834265045 18.09210344520568 13.99217115784921  
Pd 18.09453681928031 18.10824335204905 14.00303190948035  
Pd 18.10033711604457 20.13220307755672 11.93249279010207  
Pd 22.15700593231364 18.10809291812888 14.01405111225749  
Pd 9.88869769523066 22.15764558424677 13.99791334307764  
Pd 11.94128471310868 22.15195688428695 11.93944924382082  
Pd 14.00581780735764 22.12790166521981 13.99113276169953  
Pd 16.07056334426009 22.14170484416930 11.95161169747314  
Pd 18.09694777383976 22.15672226270448 13.99577986027921  
Pd 9.90215742078349 7.88355966458704 16.05811689464475  
Pd 11.92938747964471 5.85494548620013 16.04248809820212  
Pd 14.00329634293758 5.84049822497759 18.08554437616170  
Pd 16.07014067210670 5.83531133779771 16.06300510235254  
Pd 5.82228803412456 11.94590252435453 16.05764717656432  
Pd 7.87467119687266 11.93148767197546 18.09956440201388  
Pd 9.89389498183796 9.90157535761096 18.09861342467682  
Pd 11.96841369393326 11.93820472327203 18.08745199046889  
Pd 14.01553065661395 9.90704981427880 18.10405459229172  
Pd 16.03652637570775 9.91352700500557 16.04330974506314  
Pd 18.10573590023387 9.90518797805220 18.09378964898609  
Pd 20.13693827871118 9.89685122403338 16.04991618484489  
Pd 22.14168305970900 11.92434895999037 16.04741602971843  
Pd 5.82482704717242 16.06175360634276 16.07423346336926  
Pd 7.87238610108084 16.07189334483787 18.09944532563398  
Pd 11.97484493237651 16.05867172965322 18.08494546234285  
Pd 13.99368096902703 13.99659578375872 18.10124816761778  
Pd 18.09220663019117 13.99769560306929 18.10026304201378  
Pd 22.15165300804719 14.00116749686337 18.09680778330830  
Pd 22.13440185968181 16.07681667013608 16.05324539723368  
Pd 9.89745853055207 18.09889604540930 18.10343734228497  
Pd 14.00724824528016 18.10512099034667 18.09642318719476  
Pd 18.09930352793367 18.10992753257047 18.08848105602929  
Pd 18.09826327401188 20.12221376008170 16.06152381312351  
Pd 20.10402203940064 18.11278460987379 16.05371283172463  
Pd 11.94142175757449 22.15060513524179 16.05156396493533  
Pd 14.00828766767986 22.16259790722219 18.09872908383560  
Pd 16.07980852411714 22.14795355515923 16.04808807622452  
Pd 14.01154019010205 7.90221026820284 20.12215366383525  
Pd 11.95702023756549 11.94000311498382 22.16023786674780  
Pd 14.00847835702158 9.90898291273765 22.16119102914145  
Pd 16.05958041070293 9.89788113223689 20.11560921865246  
Pd 18.09326486077765 11.91748891523132 20.11105105668116  
Pd 7.86310566886322 14.00066381752648 20.10405666331734  
Pd 9.90696932802751 14.00283278917841 22.15085836001697  
Pd 11.95528976167111 16.05786646173985 22.16389423138112  
Pd 13.99094637254607 13.99700806589719 22.15648309171306  
Pd 18.09800031233585 13.99034878205443 22.18607436461259  
Pd 18.10132892797339 16.07044583840178 20.12244484185581  
Pd 14.00729331627929 18.09997397846027 22.17928902588260  
Pd 14.01395842233854 20.13443341646906 20.13349311375937  
Ag 11.93531322750274 7.85444948173155 5.81876106718644  
Ag 14.00139241470063 5.85252291726670 5.86251715403093  
Ag 14.00343816929224 7.91986074967264 3.85485394366616  
Ag 16.06115462262876 7.84649997904703 5.82241690135356  
Ag 7.87939610505361 11.94745300396823 5.84116506667991  
Ag 9.88273535794479 9.88642348446300 5.80320583801857

Ag 9.92929190630760 11.97560204640670 3.81290844211975  
 Ag 11.96521319146100 9.93244501832145 3.82236926634707  
 Ag 11.94690984319085 11.96866501378395 5.84852240611115  
 Ag 14.01013748547610 11.97613571704409 3.85249414385410  
 Ag 16.03026643988156 9.93541165430161 3.85106920366899  
 Ag 18.12045762172044 9.88085208468603 5.79834568552688  
 Ag 18.06621873707762 11.97693297025446 3.85644718356258  
 Ag 20.14934533316777 11.94224721347032 5.82007885871079  
 Ag 5.84012431296962 14.00035143193671 5.83559789268463  
 Ag 7.91327002083313 13.99730661442072 3.87230596737825  
 Ag 7.83684880231957 16.07566733359880 5.80204422852537  
 Ag 9.93740706372279 16.02557204499003 3.86095355508276  
 Ag 11.97781924649146 14.02847703662397 3.84520608548050  
 Ag 14.00506674881904 16.03718800301827 3.86851827186515  
 Ag 16.03683539726067 14.00420972895989 3.87970100561005  
 Ag 18.07168425467791 16.02753153274811 3.85401503701721  
 Ag 20.08867130452611 14.00279965076312 3.85063146328293  
 Ag 20.14136738118725 16.05584491100900 5.83649513962892  
 Ag 22.13911366355881 13.99886703354773 5.86800752485039  
 Ag 9.90448039799062 18.10475536299711 5.83195197148700  
 Ag 11.97799163636093 18.05421581983571 3.85552120953857  
 Ag 11.95046246314543 20.11255915407870 5.86106298422246  
 Ag 13.99960455216410 20.06708551449787 3.87203688770220  
 Ag 16.02358990085248 18.06814177037760 3.86376548954633  
 Ag 16.05064917473862 20.12847339664318 5.84845758978395  
 Ag 18.12172294760973 18.11620494473348 5.80864747665080  
 Ag 13.99596612703820 22.12028213602262 5.87403125703363  
 Ag 11.96967121279563 3.85203524095216 9.93782379414972  
 Ag 13.99969475956103 3.85267096142042 7.92724177493677  
 Ag 16.03795125174202 3.85465431013058 9.94211057622637  
 Ag 7.86158615823294 7.87337024592593 9.89903843422592  
 Ag 9.88288117591531 5.81394811207006 9.88001239220571  
 Ag 9.87856173984794 7.84250102977124 7.84610117568247  
 Ag 11.94314726314665 5.83243161499912 7.86250931659961  
 Ag 11.97033261756445 7.88444936989780 9.91397935844645  
 Ag 16.05827326237567 5.82153452579455 7.85120609758649  
 Ag 16.03835612923986 7.86812109294485 9.91064237114491  
 Ag 18.10879369288023 5.82468280741691 9.90121215520804  
 Ag 18.11960242657468 7.85124985973090 7.83925078952511  
 Ag 20.12807458852652 7.86462881152503 9.89622725658728  
 Ag 3.82520144250337 11.97790580235765 9.93267751888057  
 Ag 5.81276651428566 9.88320756127590 9.88768723161966  
 Ag 5.80616245550683 11.93073922587060 7.84814089517014  
 Ag 7.87760112503731 9.90082219595260 7.85779872317164  
 Ag 7.90034321163079 11.94557983965463 9.91273227230597  
 Ag 11.96154978810373 9.90470910020401 7.87791128017734  
 Ag 11.94331255257233 11.96234364031247 9.92008971904653  
 Ag 14.01705868768266 11.96797662805304 7.86675746668952  
 Ag 16.03066160921044 9.90313427347103 7.86548522028438  
 Ag 16.06231565889840 11.96381509374904 9.92187923029126  
 Ag 18.09421649141746 11.97256968545911 7.85973786855111  
 Ag 20.15381825596230 9.87663762501583 7.84782828437355  
 Ag 20.10797354583107 11.96738655679953 9.91077296236983  
 Ag 22.19811356160474 9.87854903048721 9.87434175641633  
 Ag 22.16554630222325 11.94189523647299 7.86354805782702  
 Ag 24.14016504913810 11.97428527151225 9.94502272900821  
 Ag 3.87209543763976 14.00520943625297 7.90679699926837  
 Ag 3.83644393198859 16.02124229547742 9.93067595726759  
 Ag 5.84359049158452 16.05384558710683 7.85965252467046  
 Ag 7.90176943182084 14.00132565960734 7.90243638239975  
 Ag 9.92379736127118 16.05842557990338 7.88737246709742  
 Ag 11.93889822655291 14.00532708631182 7.87425894896966

Ag 11.96421497490855 16.06506328198117 9.93670874278121  
 Ag 13.99678628527540 16.05298230179210 7.87440999785795  
 Ag 16.04462604342904 14.02199995728851 7.85977336350569  
 Ag 18.08949585391795 16.03724724417961 7.88585146705166  
 Ag 20.13311960574191 16.02946439282670 9.90343934609921  
 Ag 22.18192919090253 16.06328270397916 7.85402215961090  
 Ag 24.14412458441349 13.99804531144207 7.92908986262030  
 Ag 24.13541629257332 16.02689458045506 9.94731641156958  
 Ag 5.82416452405206 18.09750412808418 9.89099482612077  
 Ag 7.85650005710328 18.09631262944961 7.87512588065411  
 Ag 7.84729652995083 20.15575770155146 9.87612134362416  
 Ag 9.90012469233616 20.11637622033387 7.87237099791858  
 Ag 11.96770455468877 20.08499161475467 9.91236338987006  
 Ag 16.04148906844675 18.07482264428084 7.89298757801824  
 Ag 16.03895140798954 20.11793108783183 9.92091130143400  
 Ag 18.12117139388564 20.14216938710150 7.84981136498602  
 Ag 20.15915340491348 18.12472529711988 7.84806383873498  
 Ag 20.13342073040062 20.13882903179916 9.90121892174216  
 Ag 22.19649321967248 18.12325666349242 9.88129984054506  
 Ag 9.88370763116336 22.18267211941967 9.88129917381401  
 Ag 11.95034570229621 22.15035671429864 7.87430299111746  
 Ag 11.97491157649473 24.13375739740599 9.94167687765488  
 Ag 14.00310003571554 24.13074290619844 7.93647512146217  
 Ag 16.05330271524839 22.15373023967914 7.86601236150649  
 Ag 16.02839033205381 24.13262868185501 9.94820352335788  
 Ag 18.10948902070258 22.17825286957670 9.90042407188034  
 Ag 7.90149258614179 3.87797972051050 14.00129206193821  
 Ag 9.93173657953710 3.85645199008820 11.98077259349253  
 Ag 11.95779794561887 3.85135810737105 14.00423329644635  
 Ag 14.00930399110027 3.85337044179335 11.95849447366160  
 Ag 16.05338091913551 3.85894345656327 13.99976641599452  
 Ag 18.07085318867094 3.84531359038493 11.97404992085575  
 Ag 20.09543980415948 3.86382421860193 14.00286337370457  
 Ag 3.85794140903749 7.90170220410261 13.99952283782923  
 Ag 5.83510609767041 5.83695354545387 14.00048050727671  
 Ag 5.83817298500113 7.87915727711906 11.94406414787672  
 Ag 7.84529665031710 5.81915524623349 11.93230986271395  
 Ag 7.89722968543930 7.90388460783850 14.00388008298785  
 Ag 9.92279735712140 7.90210477163336 11.94676800302456  
 Ag 11.92602725199049 7.88774145869299 14.00172376023576  
 Ag 13.99925741485299 5.86674515468942 14.00064037297910  
 Ag 13.98783150418763 7.88037935759836 11.94544165133833  
 Ag 16.06580165905254 7.87084915353397 13.99856439842375  
 Ag 20.12471186991720 5.86084742044814 11.96245103573405  
 Ag 22.15018261190652 5.85280914147746 14.00179711636889  
 Ag 22.16850244080561 7.86067735742074 11.95059717217237  
 Ag 24.14774071015008 7.90171062039429 14.00302108555920  
 Ag 3.81608172552048 9.92643688808258 11.97351227172758  
 Ag 3.82870502146543 11.97142000558557 14.01746922653510  
 Ag 5.84919423256360 11.94779022427724 11.96565510252295  
 Ag 7.86531724321965 11.93651171703885 14.00004730690613  
 Ag 9.92365046955033 11.94463853552707 11.96612365655366  
 Ag 11.96517928799144 11.95656984736172 13.98205452699892  
 Ag 13.97818685719245 11.96236789641477 11.94885796333072  
 Ag 16.06687592810286 9.91479450176835 11.93895076122597  
 Ag 16.03817252636363 11.95350101411164 13.99131412675099  
 Ag 18.10750927681427 9.90723460372037 13.99483568966198  
 Ag 20.11114063557821 9.91069283598516 11.94664342447698  
 Ag 20.15323802111118 11.94893708714477 13.99764914740317  
 Ag 24.13672297699934 9.92952790452579 11.98517614606148  
 Ag 24.09147535241491 11.96214006569645 14.00025095614811  
 Ag 3.84357971425583 14.00851807245370 11.97855231677532

|    |                   |                   |                   |
|----|-------------------|-------------------|-------------------|
| Ag | 3.88250263716653  | 16.03692607371093 | 14.00106505593551 |
| Ag | 7.86206572893372  | 14.02594805321490 | 11.94316492256138 |
| Ag | 7.84145193234518  | 16.03972000731959 | 14.00612747686833 |
| Ag | 9.91910002921308  | 16.04864206429109 | 11.94722712786833 |
| Ag | 11.95417684661659 | 16.04009179199771 | 13.97241290109091 |
| Ag | 14.00908572118287 | 16.04686992937761 | 11.95949859347591 |
| Ag | 16.05580984349250 | 14.01769572753259 | 11.95961928142792 |
| Ag | 18.07358638442962 | 16.04520532485733 | 11.96306193130519 |
| Ag | 20.13572147521453 | 13.99527342066806 | 11.95686001020267 |
| Ag | 20.14677732019160 | 16.07159021205842 | 14.00564160087011 |
| Ag | 24.11781869040171 | 14.00076097801213 | 11.97747053505929 |
| Ag | 24.10248904233411 | 16.03151132690943 | 14.00627928416598 |
| Ag | 3.86242606666950  | 18.05181368396614 | 11.96691413290711 |
| Ag | 3.85467805962040  | 20.06487202132137 | 13.99655283728357 |
| Ag | 5.82908075396760  | 20.14036949805989 | 11.93768880151730 |
| Ag | 7.86233640169731  | 18.07816153325233 | 11.96120344874840 |
| Ag | 9.91390865148590  | 20.10193392731360 | 11.96198251848342 |
| Ag | 11.95561071426055 | 20.13300614401687 | 13.99036493839602 |
| Ag | 13.99592618968304 | 20.12470381750193 | 11.95992987338040 |
| Ag | 16.06416845824105 | 18.07589402889610 | 11.96012195464701 |
| Ag | 16.08635393267661 | 20.14598502620909 | 13.99103101481575 |
| Ag | 20.11814178621962 | 18.10130791779316 | 11.95530267555764 |
| Ag | 20.08561092827449 | 20.11387584643964 | 14.01212165774097 |
| Ag | 22.19286987243751 | 20.16235105828758 | 11.94126017733172 |
| Ag | 24.13539286303895 | 18.06726264211084 | 11.98700897814772 |
| Ag | 24.13162784721227 | 20.09883596431909 | 14.01168872189450 |
| Ag | 5.86690845080779  | 22.13110715281792 | 13.99803121356756 |
| Ag | 7.85873088362928  | 22.16058520737403 | 11.93844942711131 |
| Ag | 7.91247385037207  | 24.14098402388408 | 13.99388000095608 |
| Ag | 9.94213699569192  | 24.13939308566411 | 11.97819515194540 |
| Ag | 11.97146090647523 | 24.10152140619200 | 13.99717433596617 |
| Ag | 14.00857223898871 | 24.10600712867161 | 11.96716099761361 |
| Ag | 16.03073433871803 | 24.11083391881767 | 13.99640585733315 |
| Ag | 18.06551655745965 | 24.15190928154427 | 11.98381525672438 |
| Ag | 20.13725955686176 | 22.16479218224377 | 11.94717118710121 |
| Ag | 20.09833637723666 | 24.12763109306621 | 14.00254962245498 |
| Ag | 22.16570993036812 | 22.17029189676919 | 14.00702770972469 |
| Ag | 9.93132831247597  | 3.84377402649799  | 16.02643854644062 |
| Ag | 11.96697525882539 | 3.87404460168509  | 18.05362218557379 |
| Ag | 13.99710339246650 | 3.86321002168159  | 16.04407045001164 |
| Ag | 16.03565519693324 | 3.85604584601772  | 18.06652011723730 |
| Ag | 18.07531664713613 | 3.85515563242897  | 16.02050214209375 |
| Ag | 5.78917444324964  | 7.83361854115304  | 16.07844885749084 |
| Ag | 7.85887428429840  | 5.84418781810401  | 16.05640244212132 |
| Ag | 7.86015080482941  | 7.85864308145543  | 18.09923868138152 |
| Ag | 9.89233401670442  | 5.83723472930863  | 18.09392083491037 |
| Ag | 11.96342717877504 | 7.87613005696176  | 18.08536543598056 |
| Ag | 14.01640334586910 | 7.88001089482364  | 16.05234565655203 |
| Ag | 16.04266676841257 | 7.90583387532069  | 18.08961761784312 |
| Ag | 18.13089140174144 | 5.80784715875336  | 18.12652051218897 |
| Ag | 18.09326208408842 | 7.89482250577532  | 16.05077270440108 |
| Ag | 20.13717026908024 | 5.83353940025820  | 16.05136365578702 |
| Ag | 20.14216569492609 | 7.87146057153908  | 18.10818148229493 |
| Ag | 22.14696544065709 | 7.86926647721668  | 16.04516223411792 |
| Ag | 3.85150175875551  | 9.93109295920507  | 16.02423848894450 |
| Ag | 3.82076009681811  | 11.98383117886436 | 18.07407637250600 |
| Ag | 5.80936569962080  | 9.90344509036729  | 18.11240101087875 |
| Ag | 7.86691745139473  | 9.91452061693757  | 16.05466830649146 |
| Ag | 9.91638059168686  | 11.95143876725871 | 16.05710220279987 |
| Ag | 11.94385688618018 | 9.91192955760335  | 16.05936036268588 |
| Ag | 14.00491044620707 | 11.93843848611551 | 16.05540887599678 |
| Ag | 16.06343440593666 | 11.92858673373748 | 18.09691848432989 |



Ag 18.09317571862559 11.94113479656865 16.04763245674762  
 Ag 20.12379712227531 11.94101798891832 18.08469250151439  
 Ag 22.18491199334969 9.88474792514517 18.10362043395634  
 Ag 24.15082615382531 9.93424330759314 16.01918673251314  
 Ag 24.12586412022713 11.97055636260445 18.04893195071331  
 Ag 3.83382251575374 14.00789337797425 16.02949626047806  
 Ag 3.81645469916874 16.02322537786865 18.07994404823332  
 Ag 5.87141790719523 13.99996582432966 18.08306344081525  
 Ag 7.85419286713409 13.99774340619769 16.04672051642753  
 Ag 9.89798093028281 14.00283031138987 18.09312191703079  
 Ag 9.91497640636658 16.05698497396910 16.05441823421657  
 Ag 11.97992127368958 13.99884935566173 16.05958027871686  
 Ag 14.01094620479803 16.04758386031515 16.04042730703713  
 Ag 16.04652076037370 14.00627039300052 16.03197852491730  
 Ag 16.06733881857410 16.04852255641980 18.09777425523880  
 Ag 18.08860406703580 16.04968670851655 16.01310939144624  
 Ag 20.14548097659485 13.99834738865196 16.04368127370810  
 Ag 20.10083804156139 16.05812850854413 18.07747315212750  
 Ag 24.09023968690331 14.00089276799634 16.01961511716229  
 Ag 24.11904527259045 16.02843293736470 18.04940256369878  
 Ag 3.84296337825580 18.06259847730389 16.03227481003502  
 Ag 5.80755491607915 18.09965930811951 18.11369705186087  
 Ag 5.81989962466687 20.14242323356935 16.05943134861889  
 Ag 7.86470185716888 18.08879962713365 16.04005293573752  
 Ag 7.84464898049650 20.15597718904866 18.12138342485931  
 Ag 9.89985241490633 20.12544833719740 16.02957456488507  
 Ag 11.96534278304590 18.08303237736892 16.05378763318160  
 Ag 11.97266373252030 20.13715358390781 18.09794689777444  
 Ag 14.00695700269324 20.15157277186009 16.03293749409858  
 Ag 16.05343886522972 18.09369109177007 16.02002315119634  
 Ag 16.04714242641531 20.12789630186597 18.07981275021888  
 Ag 20.11507725813182 20.12248094442170 18.08706626439177  
 Ag 22.15632988309561 18.11319528686977 18.09997740865821  
 Ag 22.16183897015476 20.13946254448780 16.06018793494023  
 Ag 24.14867268494163 18.06626008108127 16.02633071568895  
 Ag 7.84756672439965 22.17427221739683 16.05785756382956  
 Ag 9.88295355358466 22.19641542608725 18.11588520257435  
 Ag 9.94007291360934 24.13891324154333 16.02017550265481  
 Ag 11.97603672899350 24.13691149625291 18.05066073094797  
 Ag 14.00830348376556 24.09988930192851 16.02210722738153  
 Ag 16.03090438510557 24.13622711615943 18.05182616359052  
 Ag 18.11732502575553 22.17767170041689 18.10838905530474  
 Ag 18.06799788378072 24.15339503776887 16.01108153319818  
 Ag 20.13089434010974 22.17611299781532 16.06082274201487  
 Ag 14.00593699015962 3.86984087598274 20.07285141710389  
 Ag 9.87428617805640 7.85407275818477 20.15611135791485  
 Ag 11.94856581013165 5.84468072575725 20.13955097632195  
 Ag 11.94717961516273 7.86544412200739 22.15018289365873  
 Ag 14.00945732174501 5.87682346282693 22.12474075981086  
 Ag 16.05578167087615 5.84429626456642 20.12714929555577  
 Ag 16.05360849303279 7.89752244072771 22.13844287652081  
 Ag 18.11274572554537 7.86785083417570 20.13216770015061  
 Ag 5.83203950400716 11.94474607847079 20.13404503384848  
 Ag 7.85571216785420 9.89575609241428 20.12674764894140  
 Ag 7.85899646909117 11.95549794021152 22.15525975150394  
 Ag 9.88148174679373 9.88111896120516 22.19133172000286  
 Ag 9.91505211270769 11.95465290057638 20.11066257256025  
 Ag 11.96271026465152 9.91734409804264 20.10710817419493  
 Ag 13.99642878581865 11.94614726374083 20.11635074091026  
 Ag 16.05424445201860 11.95366967624411 22.13153612542379  
 Ag 18.10813529309056 9.89597306816358 22.17543167431418  
 Ag 20.14205991413429 9.89642246254814 20.14568847687591

|    |                   |                   |                   |
|----|-------------------|-------------------|-------------------|
| Ag | 20.12838495025438 | 11.93968898808841 | 22.16387327663104 |
| Ag | 22.19196199762968 | 11.93275329090226 | 20.16198473021751 |
| Ag | 3.82166566152454  | 13.99986673655298 | 20.10962041849997 |
| Ag | 5.84418896292531  | 14.00004705575725 | 22.12672175885676 |
| Ag | 5.83052705423937  | 16.05550174635470 | 20.13657679126252 |
| Ag | 7.86489613335974  | 16.04400460422930 | 22.15142229981513 |
| Ag | 9.92260371993869  | 16.04793808967569 | 20.10881868464755 |
| Ag | 11.97182033020338 | 13.99688710174009 | 20.13233171677457 |
| Ag | 13.98638890765284 | 16.04182220865534 | 20.12242757344149 |
| Ag | 16.08568745736166 | 13.99767335182212 | 20.11711330724177 |
| Ag | 16.05345386581956 | 16.02860879596951 | 22.14997361035282 |
| Ag | 20.07423829694435 | 13.99725014335233 | 20.12204496543978 |
| Ag | 20.13241739106654 | 16.06012244819139 | 22.16851075748630 |
| Ag | 22.16273132511422 | 13.99901152038970 | 22.16735246426028 |
| Ag | 22.17714319614699 | 16.07018928649345 | 20.15576317631831 |
| Ag | 24.12514939059101 | 14.00214674381459 | 20.07477060063638 |
| Ag | 7.85976601491155  | 18.10330077446408 | 20.12860625933127 |
| Ag | 9.88941274666887  | 18.11711201244428 | 22.19063771211439 |
| Ag | 9.88148882128032  | 20.15071250467257 | 20.15463386111904 |
| Ag | 11.97547634672859 | 18.08993450191522 | 20.11543659156614 |
| Ag | 11.94595359142469 | 20.14600355332631 | 22.16400332124365 |
| Ag | 16.04640413679785 | 18.10447864907449 | 20.11602702114485 |
| Ag | 16.06545448182681 | 20.14206676110928 | 22.18282120612536 |
| Ag | 18.12029678310780 | 18.11778246443732 | 22.20021378019328 |
| Ag | 18.12797447150127 | 20.16295146703987 | 20.16176487844880 |
| Ag | 20.12429364283896 | 18.10410793622908 | 20.14888192239469 |
| Ag | 11.94192032584377 | 22.17807999316874 | 20.15047875891989 |
| Ag | 14.00266448468621 | 22.14413192015115 | 22.13974393978862 |
| Ag | 14.01139258281824 | 24.14255842247101 | 20.06712099225082 |
| Ag | 16.06957117949883 | 22.17574819726454 | 20.14733008393485 |
| Ag | 14.00473499128001 | 7.92363399467518  | 24.12593492338068 |
| Ag | 9.93548515253038  | 11.97566970650408 | 24.12758391841111 |
| Ag | 11.97270362064406 | 9.93022920402906  | 24.13924256455659 |
| Ag | 13.99017482527397 | 11.96697146011613 | 24.15699588054791 |
| Ag | 16.03638957456655 | 9.93204932489015  | 24.17369292342128 |
| Ag | 18.08147508775647 | 11.97145813969677 | 24.18924552960331 |
| Ag | 7.91355776101937  | 13.99969174947100 | 24.13040633997517 |
| Ag | 9.93650124669745  | 16.02552921167562 | 24.13922922980581 |
| Ag | 11.96280546483937 | 13.99908962862846 | 24.11803436410255 |
| Ag | 13.98989767410224 | 16.02841587898330 | 24.15963845368933 |
| Ag | 16.02149257728770 | 13.98741221562136 | 24.18600037808940 |
| Ag | 18.07712954944750 | 16.01941309790432 | 24.18419451779942 |
| Ag | 20.11003445100823 | 13.99911741206748 | 24.13120815752262 |
| Ag | 11.97057834749138 | 18.06499203450038 | 24.14990382342751 |
| Ag | 14.00188315943613 | 20.07670014381744 | 24.14961303195987 |
| Ag | 16.03745527845730 | 18.07077833243822 | 24.17543929386293 |

**Pd<sub>43</sub>Ag<sub>158</sub>L<sub>1</sub>-614.310**

|    |                   |                   |                   |
|----|-------------------|-------------------|-------------------|
| Pd | 8.45536046188404  | 12.49998407311585 | 16.54466115601103 |
| Pd | 12.50001376932069 | 14.51399028168348 | 14.51402104147062 |
| Pd | 10.46499989198229 | 18.61608722848305 | 12.48643835991106 |
| Pd | 12.50000620948422 | 10.48596575466539 | 10.48601760595337 |
| Pd | 12.49999575977038 | 8.45534114813002  | 8.45537865512130  |
| Pd | 14.53498848349560 | 6.38397843415947  | 12.51359254631877 |
| Pd | 14.53978978678269 | 10.46020558804343 | 16.55293782555279 |
| Pd | 18.61602162837903 | 12.48642366168179 | 14.53498013464448 |
| Pd | 8.45175622641662  | 12.52116617059853 | 8.45177394120041  |
| Pd | 10.46021256185161 | 16.55297777759159 | 10.46020401598236 |
| Pd | 12.52120390432336 | 8.45177381879032  | 16.54823985791485 |
| Pd | 8.45535814584131  | 8.45535275061143  | 12.50004833437475 |
| Pd | 14.53978753961102 | 8.44706154738880  | 14.53979597524405 |
| Pd | 14.53499619069120 | 12.48640736896044 | 18.61600611909617 |

|    |                   |                   |                   |
|----|-------------------|-------------------|-------------------|
| Pd | 10.46498970882713 | 12.51355570618175 | 6.38391814605817  |
| Pd | 10.48525885169860 | 14.51473335015369 | 16.53332929960251 |
| Pd | 12.47882507499955 | 16.54825800799504 | 8.45172282985280  |
| Pd | 8.44701068085790  | 14.53977917743381 | 10.46023018838523 |
| Pd | 8.46669158932523  | 10.48523189632420 | 14.51479286138425 |
| Pd | 16.55291756420117 | 10.46020600453932 | 14.53979077856198 |
| Pd | 12.50001127301006 | 16.54463568893290 | 16.54463495408760 |
| Pd | 12.51359428257662 | 6.38399561989049  | 14.53499172900978 |
| Pd | 14.51401176997520 | 12.49998103602991 | 10.48599070276082 |
| Pd | 18.61598656986885 | 10.46501786095457 | 12.51360937038458 |
| Pd | 14.51476678118637 | 16.53330639557302 | 14.51474292860220 |
| Pd | 6.38392549900579  | 12.51356085918801 | 10.46503097835009 |
| Pd | 10.48599068860431 | 10.48597245291345 | 12.50004610706694 |
| Pd | 16.54465247786903 | 12.49998608814267 | 8.45533073457907  |
| Pd | 6.38392621286685  | 14.53499399438660 | 12.48645291805025 |
| Pd | 10.48599422591581 | 12.49997428883854 | 14.51403860520551 |
| Pd | 14.51401610918271 | 14.51399332112418 | 12.49999474481076 |
| Pd | 10.48525008878287 | 8.46666550561103  | 10.48528936632900 |
| Pd | 16.54822299215135 | 12.47878926654377 | 16.54821056885272 |
| Pd | 12.48643099242783 | 18.61608627349440 | 10.46500163411807 |
| Pd | 8.45176105236095  | 16.54824376845664 | 12.47883270553874 |
| Pd | 16.53332363643937 | 14.51474272124163 | 10.48523028313591 |
| Pd | 12.48643428326137 | 14.53499787729151 | 6.38388856943318  |
| Pd | 10.46021154052030 | 14.53978720645290 | 8.44701842081242  |
| Pd | 12.50000690452979 | 12.49997310553914 | 12.50002361068745 |
| Pd | 16.54465516982220 | 16.54464140074294 | 12.49997391010301 |
| Pd | 12.51358925344823 | 10.46500474660002 | 18.61602137923889 |
| Pd | 16.54821425676052 | 8.45176010262104  | 12.52120659969197 |
| Pd | 14.51476038808370 | 10.48522669380239 | 8.46668920860417  |
| Ag | 20.59366099360917 | 8.46635951519752  | 12.50587984871059 |
| Ag | 16.54852201304119 | 12.49099294038516 | 4.36671670396400  |
| Ag | 10.46447346594365 | 4.29120841567806  | 10.46449402078794 |
| Ag | 10.46081103407083 | 10.48759148458051 | 16.55377279145556 |
| Ag | 12.50792022472399 | 12.49207025349302 | 16.57645152878009 |
| Ag | 18.62556472256755 | 16.59704016603782 | 14.54802778982484 |
| Ag | 10.46880688287457 | 18.58706169595928 | 8.44402624044364  |
| Ag | 14.53233110392562 | 12.49579031219376 | 14.53232748228371 |
| Ag | 10.46766675545869 | 14.53232815243916 | 12.49582284554937 |
| Ag | 18.58250184191111 | 14.52177805824148 | 16.54858785293946 |
| Ag | 10.46976183871160 | 6.38597648565375  | 12.49537179410213 |
| Ag | 10.48760272486965 | 16.55375358776412 | 14.53921010537043 |
| Ag | 14.53119678805083 | 6.41290615464367  | 16.55605920258026 |
| Ag | 16.54853100204251 | 20.63327024158418 | 12.50896657777848 |
| Ag | 8.43430009071991  | 8.41430720398832  | 8.43433462227099  |
| Ag | 10.47138775443722 | 6.40890801135116  | 8.45592296600426  |
| Ag | 16.56001371379514 | 8.43999315675921  | 16.56001273980047 |
| Ag | 12.48892458684118 | 18.58218681649956 | 6.41782584233747  |
| Ag | 16.57643646119605 | 12.49209214078984 | 12.50789970599758 |
| Ag | 10.45194800654672 | 18.62556983255561 | 16.59703214949126 |
| Ag | 16.54861795827741 | 14.52177330513797 | 18.58247258141591 |
| Ag | 14.52860483492564 | 8.45588003555671  | 6.40891007633940  |
| Ag | 18.57752964218261 | 12.49999504423138 | 6.42244958164238  |
| Ag | 20.63326457776139 | 12.50897172516188 | 8.45147199035268  |
| Ag | 12.50588085214650 | 4.40634560667773  | 16.53363499968716 |
| Ag | 10.47140311469202 | 16.54409948457071 | 18.59107618285077 |
| Ag | 16.56570381049283 | 16.58566835539253 | 16.56567321846966 |
| Ag | 18.58214970155269 | 6.41788640854446  | 12.51106124236017 |
| Ag | 8.45136781220723  | 18.58253620961559 | 14.52179443958564 |
| Ag | 8.45135768359996  | 10.47819362910652 | 6.41748729990984  |
| Ag | 8.40296181962976  | 10.45194382515102 | 18.62554812090052 |
| Ag | 12.50911881217894 | 4.33036713632254  | 12.50914561885579 |
| Ag | 14.53921649995590 | 16.55376479590056 | 10.48763324369083 |

Ag 14.51519685216506 10.48481249711292 20.62268641847920  
 Ag 10.48686509054249 20.63837843855172 14.51019373306381  
 Ag 6.41746581046155 16.54862733916451 14.52180779594086  
 Ag 12.49208649036140 12.50789480633527 8.42352193167445  
 Ag 8.44623775536966 14.51239182504750 14.53922478214534  
 Ag 12.50584709025181 8.46634730254744 20.59366054819428  
 Ag 20.62270005851163 10.48484619801735 14.51520087769624  
 Ag 6.41746536156973 10.47819993213603 8.45140466015939  
 Ag 12.50420115886368 10.46765703848395 14.53235199588116  
 Ag 10.46766304003522 12.50417512455257 10.46768083072045  
 Ag 6.41288134116374 14.53116225103311 8.44395861007081  
 Ag 16.55375754605309 10.48765315456074 10.46078947587602  
 Ag 4.36674463720508 8.45146887117694 12.50904302903515  
 Ag 12.50913527398740 12.49087233191292 20.66962011573317  
 Ag 10.48981292789764 4.36168485544355 14.51314895564185  
 Ag 12.49999628089127 6.42247579826569 6.42249356689341  
 Ag 18.58251080473004 8.45137175838035 10.47823447389448  
 Ag 16.55374862188731 14.53919351856746 14.51237254225781  
 Ag 12.49534846269896 14.53022924192738 18.61400331684273  
 Ag 16.59706870747059 14.54805846321104 6.37441194185120  
 Ag 8.46631446795131 20.59370955413158 12.49417786738982  
 Ag 6.41287936072704 16.55605847507102 10.46884229038713  
 Ag 14.51522459540573 4.37731025344338 14.51516957457014  
 Ag 10.46449313309241 14.53551868286010 20.70878396886042  
 Ag 14.53025284200165 18.61405294136774 12.50464284168683  
 Ag 14.51020788235545 14.51313915319638 4.36159264394964  
 Ag 8.45590064949435 14.52860080694047 18.59109285717215  
 Ag 4.36673754438030 12.49100160235233 16.54854980062869  
 Ag 10.47822969494374 8.45138583746902 18.58251352196092  
 Ag 8.44402949074703 14.53116996902990 6.41294109222144  
 Ag 14.53553233688569 10.46445473025352 4.29116652451908  
 Ag 10.47824362011712 6.41749008591972 16.54863469118768  
 Ag 16.54411643305330 18.59109798331161 14.52857181875779  
 Ag 6.38595977731777 12.49534649699590 14.53025789745829  
 Ag 6.38596231730282 10.46975171103103 12.50469449720276  
 Ag 18.57753343435407 18.57753188813608 12.49995408725791  
 Ag 18.61401266240489 12.50466156549032 10.46974764374326  
 Ag 8.42352810004523 12.50790242456045 12.49211808099100  
 Ag 8.45149388441900 12.50899695002573 20.63325494355337  
 Ag 12.49100790473401 16.54851618455906 20.63322490330994  
 Ag 16.55605990376487 6.41289616063181 14.53118296560999  
 Ag 4.40630551805124 12.50581046721627 8.46636331123310  
 Ag 10.48765107950985 10.46077387268295 8.44625126508415  
 Ag 14.54806803663869 16.59703632624267 18.62553435186049  
 Ag 4.29116346407011 10.46446210247202 14.53554923108524  
 Ag 18.58213279289177 12.48894096240847 18.58210354152193  
 Ag 12.50466767198492 18.61404534603131 14.53022987933199  
 Ag 14.52179694136182 16.54864201593734 6.41742796320719  
 Ag 6.40890776146320 8.45588184537179 14.52864670505188  
 Ag 12.49209458853146 16.57646852149311 12.49209444256003  
 Ag 10.45193044108154 8.40294073480329 6.37444095385915  
 Ag 20.70882110914007 14.53551826404700 10.46446471880495  
 Ag 12.50001233062667 18.57752377273732 18.57749904192564  
 Ag 14.53232770629272 10.46765815627301 12.50420673462210  
 Ag 14.51311862673436 4.36167905784496 10.48983860762152  
 Ag 12.49413930169469 20.59371214552573 8.46633775951833  
 Ag 20.63832991394309 14.51019135625690 14.51309306447932  
 Ag 16.59705570558958 18.62557845774626 10.45190555650074  
 Ag 12.49099551325047 4.36675411199845 8.45150446980558  
 Ag 8.46631646110150 12.50580991744243 4.40630794190299  
 Ag 8.45148465308214 4.36674846511397 12.49103846423180  
 Ag 14.51022112652025 20.63838396526774 10.48682913400319

Ag 14.54805191808708 6.37444519635106 8.40298168918454  
 Ag 14.52178230906203 18.58256058420901 8.45133212128909  
 Ag 16.54411424259637 10.47138048674250 6.40888739817448  
 Ag 12.50465535483074 10.46974469405050 6.38596496346272  
 Ag 12.49580121207324 14.53232880553687 10.46765687506741  
 Ag 10.46080679378418 8.44623315415824 14.51237540593564  
 Ag 10.46976975248212 12.50464616766045 18.61402160647450  
 Ag 18.58709878779825 8.44394915166736 14.53118838676972  
 Ag 6.37442842984216 8.40294318050127 10.45197430980107  
 Ag 12.51107257353364 6.41785663253411 18.58212515257829  
 Ag 12.50901128989492 20.63325931059303 16.54850506276162  
 Ag 10.48479653737720 14.51518534025727 4.37727018493603  
 Ag 14.51234147479062 14.53919063737722 16.55374414373355  
 Ag 10.46881687970262 16.55596176754407 6.41291250249372  
 Ag 8.40297361007732 6.37445090629219 14.54808560752923  
 Ag 16.56569768451312 8.43429516607554 8.41432877998456  
 Ag 14.53555173554824 20.70883130752559 14.53552603543291  
 Ag 16.53366510286141 4.40634862320507 12.50584042069483  
 Ag 20.66964262971502 12.49089487108960 12.50912643561997  
 Ag 18.58710203754114 10.46882237197384 16.55603656523939  
 Ag 8.44623565061416 10.46078109624469 10.48763565232119  
 Ag 8.44402860715504 18.58706024547701 10.46882058138139  
 Ag 14.52861979877667 18.59109435214247 16.54408847318990  
 Ag 4.36163263470663 14.51314021982036 14.51022401794951  
 Ag 18.59110381909917 16.54411806460815 10.47135557511678  
 Ag 12.49533514737608 6.38597776415124 10.46978705387284  
 Ag 12.49089323469047 20.66969270569939 12.49086630348702  
 Ag 14.53024681273687 12.49533154167799 6.38594120911236  
 Ag 18.61402260148217 14.53024514128786 12.49531551142776  
 Ag 18.62556079569011 10.45193121308511 8.40295129308324  
 Ag 4.40630167972330 16.53366453372986 12.49419912768886  
 Ag 16.55605855292488 10.46881887196307 18.58708932516500  
 Ag 12.50791124286911 8.42354994588285 12.50793469986104  
 Ag 14.51313039410068 14.51017734445000 20.63829388219191  
 Ag 12.49087579600215 12.50910999302284 4.33030961669004  
 Ag 6.41783199967001 12.51105482830663 6.41786285670396  
 Ag 6.42247677321471 6.42247895477951 12.50005016783638  
 Ag 20.63828704121130 10.48690221326918 10.48981610374113  
 Ag 6.41783280917839 18.58216232715180 12.48893783319932  
 Ag 14.53118590196643 8.44394627098872 18.58711044261796  
 Ag 16.54861053107818 6.41749157849352 10.47823404880720  
 Ag 6.37443335260773 14.54805754491434 16.59706486097608  
 Ag 6.42248254543499 12.49999274418111 18.57753383299743  
 Ag 16.58569818789767 16.56569866928115 8.43426603935064  
 Ag 20.63325827213554 16.54852273808699 12.49095897951981  
 Ag 8.41433487153398 8.43430761089510 16.56572072940326  
 Ag 18.59111829832914 14.52859501870807 8.45587997657218  
 Ag 8.43430974071122 16.56568981005257 16.58568661502584  
 Ag 4.37727258119748 14.51518369511911 10.48483537196102  
 Ag 4.33032295079972 12.50911676873792 12.49090719666265  
 Ag 12.50899773824179 8.45146726750205 4.36675155653224  
 Ag 14.53921292624590 14.51239385869434 8.44622193892554  
 Ag 10.48982595904176 10.48687809811311 20.63833057867503  
 Ag 12.49417184767636 16.53367478633917 4.40627368439614  
 Ag 10.48476949002088 20.62272623543255 10.48482870919987  
 Ag 8.45589450923834 6.40891232740918 10.47144024367762  
 Ag 4.36163612188180 10.48979606550723 10.48689878302037  
 Ag 20.59366104960004 12.49417631751529 16.53363739270275  
 Ag 10.48685198058676 10.48978410032072 4.36163796932392  
 Ag 14.51239123503885 8.44624349447453 10.46081721112771  
 Ag 6.40889540775543 10.47139793351415 16.54411048284697  
 Ag 8.43996109922461 16.56003203649731 8.43996176317236

Ag 16.53365895991441 12.49416504094052 20.59363130001339

**Pd<sub>43</sub>Ag<sub>158</sub>qL1<sub>1</sub>-614.433**

Pd 8.45595094876788 12.49851583725525 16.54441609320337  
Pd 12.50003188432440 14.53541156138062 14.50637553322339  
Pd 10.48412518427357 18.62357728126307 12.49716651252093  
Pd 12.48518807614924 10.45595443182244 10.49675446707719  
Pd 12.49531170389798 8.44991310089694 8.44571931107831  
Pd 14.50833902634005 6.40315924578236 12.52012107273437  
Pd 14.53949208384803 10.45839249772591 16.54771165268118  
Pd 18.61855136985940 12.48586802411566 14.54535029023050  
Pd 8.44932822070793 12.51316714056303 8.44450225280559  
Pd 12.50548312051147 16.56932042371492 12.51083556426579  
Pd 12.52155480539488 8.44937728534280 16.55387037118270  
Pd 8.44841299441713 8.44897027036606 12.50033061774152  
Pd 14.53005682552864 8.43512590938426 14.53649562753567  
Pd 14.53801316014758 12.48552910214716 18.61028311251517  
Pd 10.45680135076880 12.51059069743007 6.37530893240316  
Pd 10.49019735076386 14.51904917342287 16.53171316069603  
Pd 12.48919637321756 16.54575329921604 8.42592262784708  
Pd 8.43951357465319 14.52988811269658 10.45749226263890  
Pd 8.46483263134997 10.47718747134614 14.51380058549557  
Pd 16.55038027397601 10.45721360007756 14.54079413712206  
Pd 12.49651549135005 16.55349691699875 16.54833733693481  
Pd 12.51756121787404 6.39747090190763 14.51281114924397  
Pd 12.50279382866566 8.44033231446475 12.50858640609719  
Pd 18.61973547890246 10.46276624781643 12.51086464702570  
Pd 14.50937007254620 16.54511274166042 14.51495355512768  
Pd 6.38362868709198 12.51053026707168 10.46359675517400  
Pd 10.49351261504379 10.46727807744819 12.50226054272190  
Pd 16.56353324481723 12.49859693218116 8.43704393915184  
Pd 6.38013842982765 14.53258203530280 12.48774553666570  
Pd 10.48337770671767 12.49690091637941 14.51770623396351  
Pd 14.50352661774725 14.54610392745179 12.51557086993513  
Pd 10.49126311294691 8.46079021973816 10.49729913967204  
Pd 16.55187563823497 12.47607935878646 16.54738228829593  
Pd 12.49482206543212 18.61876301656663 10.48751615151633  
Pd 8.42536543906450 16.54729913580259 12.49067494022267  
Pd 16.54025041793682 14.53203064033446 10.49846679885440  
Pd 12.48959491125101 14.53017930780210 6.37760516195866  
Pd 10.45593513204576 14.53128609804629 8.43795926346077  
Pd 12.48167712286223 12.49831916982204 12.52000447885788  
Pd 16.55127918784001 16.55287874366102 12.50065685482679  
Pd 12.51387763807862 10.46189246644208 18.61726718129164  
Pd 16.55441553067410 8.45178436274887 12.52173785068764  
Pd 14.50497594318981 10.46589816783415 8.45744697095433  
Ag 20.60458570472422 8.46828072325986 12.51081843725604  
Ag 16.55565766917800 12.48306485825117 4.36240952022538  
Ag 10.46750618943351 4.29535209951608 10.46724225882451  
Ag 10.46292472871001 10.48532810152892 16.55050838680884  
Ag 12.51158655615093 12.48991120312763 16.57270844640736  
Ag 18.62381008228137 16.59772938554710 14.54927486091298  
Ag 10.45835963086805 18.60278552047812 8.42396789237909  
Ag 14.53040726601182 12.49961243967154 14.52728366498354  
Ag 10.47034059231223 14.53792942137287 12.50923208854186  
Ag 18.58239730220169 14.52106998512495 16.55114940087974  
Ag 10.48764410755114 6.40101649240040 12.49586748458942  
Ag 10.49200724448445 16.56271833074197 14.52338854941274  
Ag 14.52874968168950 6.41576218727791 16.55498646461668  
Ag 16.53991920290952 20.61889852263836 12.50630664847180  
Ag 8.43575984436126 8.41797542673486 8.43895781246843  
Ag 10.47007487793473 6.41292637693406 8.45777054223232

Ag 16.56008216350864 8.43721745705666 16.56138455396242  
 Ag 12.49543637213277 18.57654678515987 6.41228376907127  
 Ag 16.58742278659856 12.48884097473357 12.52288697907232  
 Ag 10.45268223526531 18.62328436190020 16.59821858094066  
 Ag 16.54713184722451 14.52036079075338 18.57963495126504  
 Ag 14.52819536191046 8.44907559659678 6.39703272067369  
 Ag 18.59126850752216 12.50028138939637 6.41071381037308  
 Ag 20.63760302858768 12.51231159908157 8.44823899551641  
 Ag 12.50910742993554 4.42125793889945 16.52276734160209  
 Ag 10.47057560196475 16.54893292023074 18.59524846217873  
 Ag 16.56380609665021 16.58268136954780 16.56654607648592  
 Ag 18.58523882595102 6.42299502432391 12.51300260219744  
 Ag 8.44979912214907 18.58430853768969 14.52950171967402  
 Ag 8.44661097167880 10.47326491143471 6.41208346284908  
 Ag 8.40897032854457 10.45121374059016 18.62159481655190  
 Ag 12.50820796722293 4.31591532033366 12.50812407905075  
 Ag 14.52427605007824 16.55737018086650 10.49425254645189  
 Ag 14.51369191543028 10.48508725212860 20.62059471780683  
 Ag 10.48737301719399 20.64204376625511 14.52365681706363  
 Ag 6.40747640830353 16.54786689732246 14.53167685360081  
 Ag 12.48019749191787 12.50704734957024 8.41283413576859  
 Ag 8.44591108975856 14.51147963178700 14.53869507649274  
 Ag 12.50850546332714 8.46585651489310 20.60440160235400  
 Ag 20.62462520603974 10.48525805141136 14.51551403580066  
 Ag 6.41491343903644 10.47369865458743 8.45047444565908  
 Ag 12.50323016505619 10.45322367791261 14.52924271841076  
 Ag 10.47100015592264 12.50436878268939 10.46843445859935  
 Ag 6.41219685915914 14.52502233080713 8.44289168838298  
 Ag 16.56265425379972 10.47510221660432 10.46319089673906  
 Ag 4.35651803585609 8.44992952665635 12.50098338736601  
 Ag 12.51168027101202 12.49109380889223 20.66937765975743  
 Ag 10.49202738126981 4.37905013187749 14.51095400706866  
 Ag 12.49998909233349 6.42392455303705 6.41678983312930  
 Ag 18.59246389927530 8.44716051115572 10.48111624098672  
 Ag 16.55237367499026 14.54226105939402 14.51425987261381  
 Ag 12.49764732830986 14.53246508155764 18.61191087863165  
 Ag 16.60425988178201 14.54719359329157 6.37066716196284  
 Ag 8.47950601582930 20.58307183691152 12.50189113101188  
 Ag 6.41509684141681 16.55667023505939 10.46835558168120  
 Ag 14.51228732859426 4.37772273483720 14.51504572850756  
 Ag 10.47443873047403 14.53366165170539 20.70450733290769  
 Ag 14.51759401229958 18.60409945410163 12.50433339953253  
 Ag 14.51232496863075 14.50781397872258 4.36022017328890  
 Ag 8.45674539108122 14.53052931435734 18.59072767598673  
 Ag 4.36546910674206 12.48179748557870 16.54614729132651  
 Ag 10.48005163204840 8.45132781990549 18.58583720690059  
 Ag 8.43916598632472 14.52808607677678 6.40822227631690  
 Ag 14.53457192574757 10.46252226074356 4.29089692393595  
 Ag 10.48120235257635 6.42397862597357 16.54610963166774  
 Ag 16.54529756569438 18.59161902766821 14.53009600088832  
 Ag 6.38900991984589 12.49075615127820 14.53215488941813  
 Ag 6.38472693846879 10.46541465566713 12.50292278966589  
 Ag 18.58370228498159 18.57535624499319 12.49829810336152  
 Ag 18.60665484388674 12.50830017060931 10.46618390166826  
 Ag 8.42598586430993 12.50553057917201 12.49239703970457  
 Ag 8.45651788489962 12.51361601324342 20.63433967859152  
 Ag 12.49192413134987 16.54911122771178 20.64024689786447  
 Ag 16.55196711855747 6.41753190364370 14.53086854866480  
 Ag 4.40498042279669 12.50479538757543 8.46317186327920  
 Ag 10.48584322526436 10.45656492421540 8.44634667340646  
 Ag 14.54801948666988 16.59764553464660 18.62566124027152  
 Ag 4.29364210466167 10.46076996335182 14.52876062676948

Ag 18.58394494403351 12.48659932348574 18.58466058895551  
 Ag 12.50375098784947 18.60657106886815 14.51599598393900  
 Ag 14.52991696772515 16.55079443374926 6.40202091154500  
 Ag 6.40095806170030 8.45105140914099 14.52878402603563  
 Ag 10.47658125205758 16.57527913378917 10.48369671459874  
 Ag 10.44811282379055 8.39925087047595 6.36726560164231  
 Ag 20.70751449764607 14.53235011508502 10.46873190419119  
 Ag 12.50221862754534 18.57574896646558 18.58701357389636  
 Ag 14.52359966592221 10.44492859981620 12.51741180139808  
 Ag 14.50875455496763 4.38134403388429 10.49250456641979  
 Ag 12.50086944809343 20.57788065376103 8.48185541087322  
 Ag 20.63656481622622 14.50919896731101 14.51516419702062  
 Ag 16.60284920508608 18.62528794768549 10.44882438402472  
 Ag 12.48791359327740 4.38395888571902 8.45953683833274  
 Ag 8.45655517823176 12.50461183342502 4.39996679370459  
 Ag 8.45887246373333 4.38641352263912 12.48818303138146  
 Ag 14.52325419528615 20.63992447845493 10.48827306618428  
 Ag 14.54596349657747 6.38282194294378 8.39944084788331  
 Ag 14.52963509986444 18.58141713181686 8.45210407597432  
 Ag 16.54860478625355 10.46635499255873 6.40396622066590  
 Ag 12.50183907565970 10.46666330957868 6.38269664011855  
 Ag 12.49465503162025 14.54610648833833 10.47666178229589  
 Ag 10.47335178120251 8.43912252142943 14.50409092834487  
 Ag 10.47013634099736 12.50600138022999 18.60738567287438  
 Ag 18.59066051274239 8.44584111000399 14.53218576681730  
 Ag 6.36552305450271 8.39827097987772 10.44881239417161  
 Ag 12.51008788834026 6.42159251798217 18.58778943248084  
 Ag 12.50690365928003 20.61847633915141 16.54097740547879  
 Ag 10.48590415527958 14.51190902214888 4.37611037058067  
 Ag 14.51081364802949 14.54027612521177 16.54992050397371  
 Ag 10.46678255878544 16.55403380893523 6.41404260210838  
 Ag 8.40245102950563 6.38417908911650 14.54405628612972  
 Ag 16.56315198305455 8.43386993863560 8.41595128565356  
 Ag 14.53962534191834 20.70088238549356 14.53917172173012  
 Ag 16.51900224211106 4.42760720208273 12.50958981890035  
 Ag 20.66768643283345 12.49154830033386 12.50970082115962  
 Ag 18.59133443097404 10.46431542747295 16.56139512866482  
 Ag 8.44845951087481 10.45837212496487 10.48955345673078  
 Ag 8.42048843115279 18.60397593363862 10.46047979219527  
 Ag 14.52389326083625 18.58736614030918 16.54430419020881  
 Ag 4.36181882238099 14.50934962066343 14.50773036929887  
 Ag 18.59979861524597 16.55167923903355 10.47029871394172  
 Ag 12.49429191246850 6.40315197769324 10.48576070550145  
 Ag 12.49552349466160 20.68708353032125 12.49543934547767  
 Ag 14.53577995739448 12.48946156987367 6.39013536934337  
 Ag 18.61472815555283 14.53172995716042 12.49881367554416  
 Ag 18.62625388400859 10.45353382867757 8.40113780060501  
 Ag 4.39861743238892 16.53168432008059 12.50171536043657  
 Ag 16.55733805375067 10.46768650730696 18.58690788281227  
 Ag 14.51420234755997 12.49654431252250 10.48884321523595  
 Ag 14.51217910142932 14.50868241788905 20.63062180385254  
 Ag 12.49351756331987 12.50321315985662 4.32827239876224  
 Ag 6.41180033503543 12.50611964886315 6.41257259096610  
 Ag 6.41327811044677 6.42365024376632 12.49670693141071  
 Ag 20.63828879384460 10.49077341522782 10.49271025327348  
 Ag 6.40935340368838 18.57731402826255 12.49892330058055  
 Ag 14.53081140385145 8.44401566578617 18.58902425451763  
 Ag 16.54345211786816 6.42740485745447 10.48139236492906  
 Ag 6.37577104724120 14.54915193812693 16.59567410768559  
 Ag 6.42778384365965 12.49904860219461 18.57357502165051  
 Ag 16.58705277979850 16.56605714264062 8.43645737347857  
 Ag 20.63561741404134 16.54577117914334 12.49770611076633



Ag 8.41894022358773 8.43644518000655 16.56198326665249  
 Ag 18.59712605040777 14.53266019519285 8.45177497572134  
 Ag 8.43812102428617 16.56266050114822 16.58385629745753  
 Ag 4.38118823951081 14.51266934379361 10.48839396952039  
 Ag 4.32708698058371 12.50354276945710 12.49146991665831  
 Ag 12.49581851508599 8.45384132470167 4.36125629922364  
 Ag 14.53805589417651 14.52162761093583 8.43407805106181  
 Ag 10.49740572467304 10.48947088663119 20.63601675538379  
 Ag 12.49891962905904 16.52849784107488 4.39997002394359  
 Ag 10.48353317993963 20.61047858167558 10.48584445902408  
 Ag 8.45900584034172 6.41744677181608 10.47679824198184  
 Ag 4.36579753037714 10.48503170256179 10.48684040155155  
 Ag 20.59677902375680 12.49099871195124 16.54214334898971  
 Ag 10.48417427199213 10.48507403844375 4.35902026677969  
 Ag 14.50048275006311 8.44410031610571 10.47294569693197  
 Ag 6.40897970693766 10.46743695157021 16.54473903393098  
 Ag 8.42285712858911 16.56744826338261 8.42478333226867  
 Ag 16.53586668173569 12.49123033529701 20.59205991418344

**Pd<sub>43</sub>Ag<sub>158</sub>LEH-613.976**

Pd 8.45620272708675 12.58634282147702 16.66217978868712  
 Pd 12.53711458024853 14.63468719154769 14.63609160382629  
 Pd 10.49730626871012 14.63391090422686 12.60217499105598  
 Pd 10.47877373817165 18.74301867118017 12.57965182979674  
 Pd 10.47353242158997 6.47362068584523 12.57069793497868  
 Pd 12.52852042044529 8.51609388018739 8.54682366989266  
 Pd 14.58714604521730 6.46376625261688 12.57288809102295  
 Pd 8.46506398833461 12.58410846723788 8.54639275476841  
 Pd 10.48424440311972 16.65373978229157 10.56104520961855  
 Pd 12.52550028075653 8.52733611872320 16.66531943354563  
 Pd 14.58642025088167 16.65514527830382 10.56225865736591  
 Pd 8.46667812470830 8.52602920373173 12.59321499140503  
 Pd 8.47744742603769 14.65112184510680 14.64219550515924  
 Pd 14.57215733583172 12.58479153502435 18.75273460753775  
 Pd 10.48414664149443 12.58407120915933 6.48285756446730  
 Pd 12.53749081742434 10.56550820114639 14.64773053566034  
 Pd 10.50260868299380 12.61375781994781 10.57467452098973  
 Pd 16.59874769779723 14.64851509080692 14.64111932350081  
 Pd 12.52924548427097 14.63299477910350 18.74080242668203  
 Pd 12.53195988015635 16.67562533945099 8.54851747549536  
 Pd 14.57823204907909 18.73723739956997 12.57991121937335  
 Pd 8.47753827726809 10.53893829166727 14.63701581092741  
 Pd 16.60097578449808 10.54639146402578 14.64984529535977  
 Pd 6.41820234664809 10.53880476099052 12.61568803898533  
 Pd 12.53161307389674 16.66366743216678 16.66718216040959  
 Pd 12.52489752976294 6.47019146573423 14.61748827530903  
 Pd 18.67382573299598 12.58666768774563 10.57431272334646  
 Pd 14.57439506415945 12.61380057135838 10.57175993816777  
 Pd 18.67308161804210 10.53892245195583 12.61558987819093  
 Pd 6.40784868358930 12.58665118921776 10.57567550410602  
 Pd 12.52804413268414 18.73671881978940 14.61975155765829  
 Pd 16.60593085828942 12.59144364939149 8.54290949713104  
 Pd 6.39568107178509 14.65028435174805 12.61105871422306  
 Pd 14.57906902066061 14.63099568081539 12.60198138713188  
 Pd 10.47979639074256 8.53779303268951 10.56207307591112  
 Pd 12.52813808605802 10.54329628287534 6.47354681740770  
 Pd 16.61842839933228 12.58958818281314 16.66328890355340  
 Pd 10.48749744867904 12.58347588877154 18.75414124148376  
 Pd 14.57780451341701 12.58667988692487 6.48603165607600  
 Pd 12.53104664375586 14.62551568687298 6.46891593124949  
 Pd 18.67987114549406 14.64282874525130 12.61067243304386  
 Pd 12.52736958629700 10.54318816533587 18.73574249064611

|    |                   |                   |                   |
|----|-------------------|-------------------|-------------------|
| Pd | 14.58528794586111 | 8.53314720797462  | 10.54939415756626 |
| Ag | 20.62965918452691 | 8.52736028488686  | 12.58822275198635 |
| Ag | 16.55683499761988 | 12.57645100501584 | 4.51917036346256  |
| Ag | 10.51306357416392 | 4.43461740343488  | 10.56979267596017 |
| Ag | 10.50969487891109 | 10.56576851433428 | 16.66889851386304 |
| Ag | 12.53388208275493 | 12.59877684756766 | 16.73141656463103 |
| Ag | 18.65289378905105 | 16.66042529572605 | 14.64581271113551 |
| Ag | 10.49659770479415 | 18.70510970232511 | 8.53342121855279  |
| Ag | 14.58065727977569 | 12.61498597022542 | 14.64429401717276 |
| Ag | 18.64245250850084 | 14.61828085822909 | 16.66264301744570 |
| Ag | 10.52247358862076 | 16.66292413913290 | 14.62189498803849 |
| Ag | 14.57138476383306 | 6.48406153024168  | 16.67079573810258 |
| Ag | 12.53736844995160 | 10.55915468217547 | 10.56557934895034 |
| Ag | 16.57565532865045 | 20.69291286022423 | 12.59168623050224 |
| Ag | 8.44380766914985  | 8.49355461254264  | 8.50829167676959  |
| Ag | 10.49351718163364 | 6.47939911318650  | 8.52708387045057  |
| Ag | 16.62646076025943 | 8.49760664864946  | 16.67443773557955 |
| Ag | 12.52686076798298 | 18.71177260189706 | 6.52568956780679  |
| Ag | 16.64261832256023 | 12.60920763900099 | 12.61261103349801 |
| Ag | 14.55492392631548 | 10.56527803750755 | 16.67277862682709 |
| Ag | 18.63656867688752 | 12.58492581353774 | 14.61845014237837 |
| Ag | 10.48540108477794 | 18.70142758703953 | 16.66549894940974 |
| Ag | 16.61011342790493 | 14.61504667470048 | 18.71095669127408 |
| Ag | 14.56401212265122 | 8.50213291513165  | 6.50226604847845  |
| Ag | 18.61997505624910 | 12.57717208571934 | 6.53102410181304  |
| Ag | 20.6339784423497  | 12.57893225197401 | 8.58210577082406  |
| Ag | 12.52412609928790 | 4.51300799385834  | 16.61401460371567 |
| Ag | 10.48255807747073 | 16.66367809558378 | 18.71623248504658 |
| Ag | 16.62528165636465 | 16.68032024933589 | 16.67617721795846 |
| Ag | 18.65230288621093 | 6.46665946121646  | 12.58725046093762 |
| Ag | 8.42835019474131  | 18.73305506892166 | 14.66352567047536 |
| Ag | 8.45396786326679  | 10.53105816602579 | 6.49308691915109  |
| Ag | 8.45166204235872  | 10.54658146814124 | 18.70493085231948 |
| Ag | 12.52313127764400 | 4.45713871323199  | 12.58858152221584 |
| Ag | 14.54575209328927 | 10.56341205717178 | 20.73010863044178 |
| Ag | 10.50876184829559 | 20.71687369650871 | 14.59090435235633 |
| Ag | 6.41611457729839  | 16.66160031260155 | 14.64598223883198 |
| Ag | 12.53529977354622 | 12.59528220772395 | 8.49132247828470  |
| Ag | 14.54599045388785 | 8.52020187067876  | 14.63176727549684 |
| Ag | 12.52315630937428 | 8.56522951509488  | 20.70831454936210 |
| Ag | 20.70705121826882 | 10.56901888129696 | 14.60935960388634 |
| Ag | 6.42452133154706  | 10.53460619703517 | 8.52584955659590  |
| Ag | 6.42587572278591  | 14.62885132971335 | 8.53030020849106  |
| Ag | 10.51312109892966 | 14.62514029840798 | 16.68175462022139 |
| Ag | 16.61317023456111 | 10.58789052221732 | 10.57097021159183 |
| Ag | 4.43132208401480  | 8.55250215877419  | 12.59306544856920 |
| Ag | 12.52860176931928 | 12.58235590157379 | 20.71954275543018 |
| Ag | 10.50993386131365 | 4.49793729767997  | 14.58722319522862 |
| Ag | 12.52846625100634 | 6.47065982793550  | 6.51947871012550  |
| Ag | 18.66567191207999 | 8.48026400462692  | 10.52596156185672 |
| Ag | 16.60812841282997 | 14.63162854842269 | 6.48920787497271  |
| Ag | 8.47245140621567  | 20.69659915160528 | 12.59145891238660 |
| Ag | 6.39952736539546  | 16.69625755858141 | 10.52376476493349 |
| Ag | 14.53854659696903 | 4.49910231461013  | 14.58583404613207 |
| Ag | 10.50711272761435 | 14.59885908160456 | 20.72986255141683 |
| Ag | 14.54679192230499 | 14.59856720448834 | 4.49184083268244  |
| Ag | 8.44899835117936  | 14.61524807702873 | 18.70730634449508 |
| Ag | 8.46851310906192  | 14.61093924035688 | 10.57780945894331 |
| Ag | 4.39614593696779  | 12.58293543478614 | 16.63163173450296 |
| Ag | 10.47907137396876 | 8.51061595532331  | 18.71935934916683 |
| Ag | 8.45221160326407  | 14.62692417385852 | 6.49480237742312  |
| Ag | 14.54311818457994 | 10.56676012317540 | 4.49735287222893  |

Ag 10.48036848164535 6.48569221041747 16.67016970590219  
 Ag 16.62716221962695 18.72772064485692 14.65887737849753  
 Ag 6.445821444664071 12.58888418622945 14.61712848992713  
 Ag 18.63589459857069 18.69993704254864 12.58746806793535  
 Ag 8.43816366482233 12.61452021300393 12.61166133838818  
 Ag 8.47095259608085 12.57437125281152 20.69970509263640  
 Ag 12.52285410819819 16.61207676019668 20.70511185145655  
 Ag 16.63783256694274 6.45727858404220 14.66010530187860  
 Ag 4.43458634212999 12.57955341435980 8.59077153135793  
 Ag 10.50210819845450 10.57478192752146 8.54379493913571  
 Ag 14.57402141550241 16.66393111055030 18.71834865521449  
 Ag 4.38239764666684 10.57631150222612 14.61294290318483  
 Ag 14.54412401246298 16.66119235455352 14.61984139788246  
 Ag 18.64876065688398 12.57720942990327 18.67823606836171  
 Ag 14.55808417200611 16.66808985782302 6.50129395325263  
 Ag 6.43909860964712 8.53257214158788 14.62586552095439  
 Ag 12.53349162991300 16.68651374442647 12.59444247939925  
 Ag 10.49781476752039 10.55807492647716 12.60696038240668  
 Ag 10.49415536155037 8.50409962606749 6.49870480579632  
 Ag 20.64914458733406 14.60049104919653 10.59693362182999  
 Ag 12.52589544180328 18.67707410534564 18.67621868479220  
 Ag 14.56827678406039 10.57097974475576 12.60743853606568  
 Ag 14.53911258792381 4.43029774475181 10.57466567805894  
 Ag 12.52270886331150 20.74611292776399 8.55460743853177  
 Ag 20.70296906137763 14.59114819764649 14.60647648348121  
 Ag 16.59563362252439 18.71404173667669 10.53952352528666  
 Ag 12.52434956348632 4.45546029192318 8.56298284762775  
 Ag 8.49184323523136 12.57590540227841 4.52012415966954  
 Ag 8.47818175549649 4.50736860424622 12.58252263254688  
 Ag 14.53215710506553 20.76161302998517 10.57570997887489  
 Ag 10.49414308220626 12.61430741311319 14.64217825544971  
 Ag 14.56328575906464 6.47516621986047 8.52614156398878  
 Ag 14.55874379242838 18.70498608344953 8.53334406720542  
 Ag 16.60814743279539 10.53167118991227 6.49386381993188  
 Ag 12.53744033432722 14.64249939152625 10.57677609854793  
 Ag 10.51273901054260 8.52761763875586 14.61987333904614  
 Ag 18.65418788457152 8.51426827793228 14.64252118120665  
 Ag 12.52670602743383 18.69374702264126 10.58291636895340  
 Ag 6.43038673266366 8.50978110257612 10.54965192623536  
 Ag 12.52790426789178 6.51057582276226 18.68252892735112  
 Ag 12.52346439949198 20.69377824596995 16.61594532605629  
 Ag 10.50879836876922 14.59653819285294 4.49482333091829  
 Ag 14.55324752827062 14.62543518492577 16.68280562224132  
 Ag 10.49984218782348 16.66400522029653 6.50545509876243  
 Ag 8.44627709175747 6.49078827689718 14.63102928941883  
 Ag 16.62104125574479 8.49074799132070 8.51632109854717  
 Ag 14.53910548687024 20.71183211814213 14.58886304072657  
 Ag 16.57982628581120 4.50156831572815 12.58986189018273  
 Ag 8.48384954463015 16.65050623447709 12.59719798674577  
 Ag 20.69704565215740 12.58089744960848 12.59010454963484  
 Ag 18.65212138799584 10.54374946648764 16.66565415253393  
 Ag 8.46946855511925 10.57676119872998 10.58461876845857  
 Ag 8.46262898133524 18.71540684854589 10.53903732134539  
 Ag 14.56974185744938 18.69879859114537 16.66484246166486  
 Ag 4.37361113662187 14.59534786036947 14.60897588731760  
 Ag 16.60729346967306 14.61064201209096 10.57790222052775  
 Ag 18.66923018980624 16.69633504573644 10.52314760676788  
 Ag 12.52912158788194 6.50572641067153 10.57334009866036  
 Ag 12.52413995909114 20.76059634000064 12.59342260853932  
 Ag 18.64942597672575 10.53391494918255 8.52160863512593  
 Ag 4.42986448673293 16.63902412547809 12.58884802097017  
 Ag 16.60877184772374 10.54756369311726 18.70240419886514

Ag 12.53899756172737 8.48610422562256 12.59086601182051  
 Ag 14.54556418346882 14.60003626873696 20.73235805939988  
 Ag 10.50537710811999 14.61526784693786 8.53436360209292  
 Ag 12.52963439317706 12.58246667838335 4.51133388453276  
 Ag 6.43808019827138 12.57779746222517 6.53293338431929  
 Ag 6.43541966563806 6.50624813652638 12.58368049664167  
 Ag 20.64641529844318 10.56221020072532 10.59823109249121  
 Ag 6.42623011246775 18.69726188470768 12.58755670417693  
 Ag 14.57348467949814 8.51049702310166 18.71552934774637  
 Ag 16.60140622311713 6.47228313874255 10.53733441760153  
 Ag 6.42623823575709 14.61873653356026 16.66173749653132  
 Ag 12.53590356015909 12.63017908180527 12.60830441064862  
 Ag 6.41656159835731 12.57772312929524 18.67723048791472  
 Ag 16.61807095095973 16.68884432058282 8.51831874227880  
 Ag 20.62999806237711 16.64324410751740 12.58675674620991  
 Ag 8.43847560028021 8.49892178890311 16.68147891661510  
 Ag 18.64161956344440 14.63261455117844 8.52660340633708  
 Ag 8.43765455547772 16.67945601451381 16.67436025092575  
 Ag 16.58733859606172 16.64786849278427 12.59719527899126  
 Ag 4.42136935259100 14.59963797930819 10.60305135869032  
 Ag 4.39332677350419 12.58092661194157 12.59468338446276  
 Ag 12.52655057441284 8.53276133119020 4.51945588303510  
 Ag 14.56363621330210 14.61756834584192 8.53323010013540  
 Ag 10.50641401950207 10.56455257399279 20.73649705529111  
 Ag 12.52547219147418 16.62886048347063 4.52120666578773  
 Ag 10.51224847859102 20.76880382130871 10.57081431164533  
 Ag 8.47074844278665 6.50148077005450 10.54825288828197  
 Ag 16.60098820973100 8.53216816083636 12.59568440228856  
 Ag 4.42935585924663 10.56991945361384 10.60315801961948  
 Ag 20.67845983095179 12.58123950643547 16.63378905401726  
 Ag 10.51016486530525 10.56623506919746 4.48927196594819  
 Ag 14.56659395660639 10.57602380083809 8.53992934147454  
 Ag 6.42312010425193 10.54555720320586 16.66244558986159  
 Ag 8.44567876930285 16.68729867342856 8.52146701934332  
 Ag 16.57737033009528 12.57440702460750 20.70146578507500

**Pd<sub>110</sub>Ag<sub>295</sub>L<sub>1</sub>-1323.751**

Pd 11.97276502642989 11.97275610475088 5.85898921594414  
 Pd 14.00420617225081 9.95227198142677 5.85889718185773  
 Pd 9.95228950563719 14.00419183896023 5.85891113728875  
 Pd 16.05081866506100 16.05080815389067 5.87043978562304  
 Pd 18.07669525415370 14.01533256779789 5.86737970016540  
 Pd 14.01534548708151 18.07668746527159 5.86739449051819  
 Pd 11.95778209918362 7.91790857902182 9.94430167397595  
 Pd 13.99582938450526 5.85887586304036 9.95226109948506  
 Pd 7.91787999475470 11.95777702322497 9.94430799372609  
 Pd 9.93564819687372 9.93566692123758 9.94252204412720  
 Pd 14.00051215359812 11.96839436824172 7.92187923100238  
 Pd 16.04225840299720 9.94430040194724 7.91790366008148  
 Pd 16.02878192160808 11.97722627875917 9.93804045562471  
 Pd 18.06436944790712 9.94252735725072 9.93564020656556  
 Pd 5.85886791381868 13.99582754316723 9.95227974529158  
 Pd 9.94431897582064 16.04224725192086 7.91792507182763  
 Pd 11.96839392254626 14.00050838453615 7.92188608511702  
 Pd 11.97721854147232 16.02879163807907 9.93806704469977  
 Pd 13.99943528874885 13.99945567902130 9.92377949742527  
 Pd 18.06135568831494 16.04825457195120 7.92018762239624  
 Pd 20.08993784368512 14.01374885925430 7.91007081072992  
 Pd 20.07981438567184 16.04825748791330 9.93863743308197  
 Pd 22.13263157650768 14.01534867895529 9.92330256488287  
 Pd 9.94253714433778 18.06437515910556 9.93567518689293  
 Pd 14.01374653013396 20.08995010743733 7.91007574324383

Pd 16.04825733512737 18.06137771914225 7.92019611209338  
Pd 16.04825356983911 20.07986161217583 9.93864788144546  
Pd 18.06878896711930 18.06883298956151 9.93120968012834  
Pd 14.01534358996848 22.13264624520700 9.92328838600498  
Pd 7.91002449751139 7.91002473916152 14.01371048474966  
Pd 9.92330624959655 5.86734477190459 14.01531085165130  
Pd 13.99952873912979 7.92185939012706 11.96838386029892  
Pd 16.02726557977951 5.85893750604821 11.97273819411623  
Pd 16.03163601439183 7.92184048585457 14.00049983151133  
Pd 18.04772736112900 5.85885308045193 14.00418326605867  
Pd 5.86732062267570 9.92325820980051 14.01531008412635  
Pd 9.93801904166044 11.97126681383824 11.97721028859056  
Pd 11.97126153707019 9.93804194998026 11.97720892767806  
Pd 11.96603416963704 11.96604233238896 13.99982821718849  
Pd 14.00058641170684 9.92376661066679 13.99944504103744  
Pd 18.06198136764376 11.97723291325856 11.97125521265060  
Pd 20.08208147028390 9.94429547948925 11.95776007877971  
Pd 20.07811884004336 11.96838206119672 13.99952621808108  
Pd 22.14106932653866 9.95224647526959 13.99579895638503  
Pd 5.85893140377379 16.02726329485604 11.97274587155815  
Pd 7.92183279763882 13.99952486836520 11.96838447956202  
Pd 7.92182731240187 16.03165178303839 14.00051098660031  
Pd 9.92375679055013 14.00060293174607 13.99944399672707  
Pd 13.99980045717268 16.03401095597202 11.96607787243734  
Pd 16.03395953718103 13.99984911161339 11.96606019709906  
Pd 16.03395349818170 16.03402516808534 14.00022433437254  
Pd 18.07623533549633 13.99947175881463 14.00057551289549  
Pd 22.12956262016064 16.05082829554544 11.94917102020822  
Pd 5.85883629535569 18.04773970932869 14.00419482311494  
Pd 9.94430684087248 20.08213176674379 11.95777417405508  
Pd 11.97721750030397 18.06201660692903 11.97127272563927  
Pd 11.96837682814530 20.07819633427892 13.99952530192214  
Pd 13.99942539570322 18.07630833007214 14.00060004987427  
Pd 18.06134888720032 20.07986004172887 11.95177229366090  
Pd 20.07979695095809 18.06138475490362 11.95176920339289  
Pd 20.08991088041607 20.08995665369797 13.98626746507064  
Pd 22.13260311282949 18.07668226587553 13.98465749192579  
Pd 9.95226323885161 22.14114047678119 13.99580070614431  
Pd 16.05082358121162 22.12959297253730 11.94918974084922  
Pd 18.07670811209595 22.13265140263157 13.98466563685313  
Pd 9.93862862524512 7.92012902331556 16.04823102684008  
Pd 11.94921386371474 5.87037242839457 16.05079512498367  
Pd 11.95178314647099 7.92011634909509 18.06136055148744  
Pd 13.98469139899742 5.86732130208344 18.07669966113656  
Pd 18.05570287637395 7.91787414396448 16.04224465095621  
Pd 5.87036392341171 11.94918449389959 16.05079746149491  
Pd 7.92011588291765 9.93862077581449 16.04822595790754  
Pd 7.92012229896074 11.95178271981049 18.06135348238166  
Pd 9.93119531467083 9.93119603541953 18.06879408418826  
Pd 14.00020821329129 11.96603950910057 16.03399462155159  
Pd 16.02281503235595 9.93802534523445 16.02877068339087  
Pd 16.02281061858353 11.97125165362314 18.06199509193992  
Pd 18.05747184885847 9.93563976977486 18.06435747647116  
Pd 22.14097118747598 11.97273755720839 16.02724959847319  
Pd 5.86732270357885 13.98468349285771 18.07669726921062  
Pd 9.93802279889959 16.02283742311366 16.02876620016529  
Pd 11.96604025244296 14.00023237883212 16.03398679604771  
Pd 11.97125005900451 16.02283512191493 18.06197973149668  
Pd 14.00058662890065 14.00060305674850 18.07625864840254  
Pd 18.06196470848673 16.02879378823216 16.02280933242253  
Pd 20.07811147784446 14.00050163378153 16.03163509904371  
Pd 20.08206484988348 16.04224810985923 18.05570317531881

Pd 22.14105288066928 14.00418167601455 18.04771279614057  
Pd 7.91787308163356 18.05572254199659 16.04223823160412  
Pd 9.93564655440813 18.05750129649029 18.06434965982700  
Pd 14.00049736299628 20.07819534775234 16.03163919378113  
Pd 16.02876330452093 18.06203061603273 16.02281900171263  
Pd 16.04223793762251 20.08213597432428 18.05569851324215  
Pd 18.06433575705875 18.06438378812102 18.05747364193714  
Pd 11.97274278731894 22.14105270224854 16.02725947913386  
Pd 14.00419926242030 22.14115173785224 18.04771904134549  
Pd 13.98629463470581 7.91001231875465 20.08995798802610  
Pd 9.93863162677625 11.95178105357657 20.07982931296107  
Pd 11.95178555128529 9.93861433343469 20.07984645481712  
Pd 11.94920813429503 11.94918222965888 22.12957064324222  
Pd 13.98468315751744 9.92325362635880 22.13263033999453  
Pd 18.05569244874225 11.95776281044691 20.08211300713598  
Pd 7.91003095172009 13.98629210700865 20.08993666671863  
Pd 9.92329833638075 13.98467378950562 22.13260629784297  
Pd 13.99950850503688 16.03165086826714 20.07814714323481  
Pd 16.03162534860576 13.99950980830843 20.07815037781163  
Pd 16.02724990422432 16.02726029248519 22.14102613903150  
Pd 18.04771281648193 13.99582131328024 22.14109792685965  
Pd 11.95777110074755 18.05572102399183 20.08210312251562  
Pd 13.99581007107098 18.04774607603159 22.14111771135590  
Ag 11.92393435806859 7.84455619934043 5.81666382968053  
Ag 14.00000843468159 5.83865969896706 5.83866945339311  
Ag 13.99931016134383 7.94202941597368 3.90158177872772  
Ag 16.04816967084884 7.90584610814463 5.87553174629628  
Ag 7.84456777111445 11.92390134088121 5.81668092823799  
Ag 9.88740322489373 9.88740881846252 5.81704137983093  
Ag 9.95142172448215 11.97742192079007 3.87480576222162  
Ag 11.97743065870741 9.95141102915270 3.87479443023270  
Ag 13.98847556326413 11.96780088059810 3.78913358839114  
Ag 16.02832346784304 9.93942989593854 3.82634333450254  
Ag 16.02352541671766 11.94097615632945 5.87038274530993  
Ag 18.10628821381990 9.88504031397198 5.82093665082925  
Ag 18.06136985359844 11.97556350108529 3.85288755887643  
Ag 20.11461863765511 11.95112321452569 5.86211792960041  
Ag 5.83898755872259 14.00016559339222 5.83885943852456  
Ag 7.94209167309871 13.99929259565424 3.90155294278504  
Ag 7.90591335702404 16.04821519275528 5.87556153241040  
Ag 9.93945732589439 16.02830334861297 3.82636772240512  
Ag 11.96782297320545 13.98845979665412 3.78915208413090  
Ag 11.94099618302940 16.02351232562292 5.87041128254542  
Ag 13.97810534790618 13.97809389104964 5.87282002803250  
Ag 14.01339378924362 16.03499833148225 3.84202266088295  
Ag 16.03502340352309 14.01337405012707 3.84201271265174  
Ag 18.05360591040018 16.03422092263448 3.86160307778500  
Ag 20.06466893530110 14.01076901588071 3.89275677085452  
Ag 20.09415030938163 16.05114618004369 5.88462193403225  
Ag 22.10175845678388 14.01570255177245 5.89822116840678  
Ag 9.88506475153888 18.10625917924770 5.82097876933383  
Ag 11.97559231090987 18.06134185579922 3.85290513732618  
Ag 11.95114725497282 20.11458827803392 5.86214320505668  
Ag 14.01078429454268 20.06464624314273 3.89275681657418  
Ag 16.03423069542145 18.05358810066658 3.86160503909371  
Ag 16.05115274908277 20.09414414692919 5.88461853167797  
Ag 18.07786784155011 18.07786645250523 5.87789609714820  
Ag 14.01570820971211 22.10174418120828 5.89819922822459  
Ag 11.97170164970214 3.82631296852276 9.93941443404484  
Ag 14.00071594643080 3.90154941687147 7.94202991582391  
Ag 16.02259488915043 3.87475678253255 9.95136900042882  
Ag 7.85678903945633 7.85679546087179 9.88234550160630

Ag 9.89373446577763 5.82092322963684 9.88503006586627  
 Ag 9.92418408024392 7.89624769055791 7.90161870488214  
 Ag 11.95185811892654 5.87553411968695 7.90584799146779  
 Ag 14.00001867944861 7.89815482034364 7.89815555622607  
 Ag 16.07608917466643 5.81666569950555 7.84453864799955  
 Ag 16.02968049231699 7.86948551556886 9.93553333350121  
 Ag 18.11261947895181 5.81699599600743 9.88737494200447  
 Ag 18.07584109555360 7.90161060880471 7.89623497867230  
 Ag 20.10374900437344 7.90159931902190 9.92415986461648  
 Ag 3.82633033119821 11.97174175656003 9.93942343165114  
 Ag 5.82088071226547 9.89372165537662 9.88502876176729  
 Ag 5.87550409738440 11.95183901557862 7.90583919516093  
 Ag 7.89623124878314 9.92417962307626 7.90161749742169  
 Ag 9.93553557745034 11.97036220381510 7.86950598712497  
 Ag 11.97036297382040 9.93554739151465 7.86950112154370  
 Ag 11.95924368637660 11.95925166994226 9.93317290275122  
 Ag 14.00003478332229 9.92760943034611 9.92759403124930  
 Ag 18.06563719123841 11.94451775372561 7.90422211853727  
 Ag 20.14320219462956 9.88235122578246 7.85679873342936  
 Ag 20.09578496935356 11.94451101621639 9.93437789251925  
 Ag 22.17904084484894 9.88505473890490 9.89372754393154  
 Ag 22.13788360518415 11.95111787381532 7.88539126846365  
 Ag 24.14719149642170 11.97557196753950 9.93865239434320  
 Ag 3.90154920298984 14.00072521859179 7.94198567815323  
 Ag 3.87472857941815 16.02258203426857 9.95139442816140  
 Ag 5.81670689697830 16.07607934873792 7.84465989819060  
 Ag 7.89820600427527 13.99999585135776 7.89823786465070  
 Ag 7.86950159693750 16.02965910227696 9.93556949932619  
 Ag 9.92759554753342 14.00002542988178 9.92761162971200  
 Ag 13.99894578163758 16.03694438955762 7.89257318689507  
 Ag 16.03693646211660 13.99894629186045 7.89256176906997  
 Ag 16.02406613055953 16.02408801334927 9.93751139554735  
 Ag 18.06887114489542 13.99531541594600 9.93115207791629  
 Ag 22.11538470549777 16.05116578972624 7.90584296175798  
 Ag 24.10719055220487 14.01076619929953 7.93532916738453  
 Ag 24.13846095853769 16.03421352293579 9.94640515593608  
 Ag 5.81700295060446 18.11260254909502 9.88740773276976  
 Ag 7.90164272418258 18.07583179714054 7.89627467909691  
 Ag 7.90162919452044 20.10374935875140 9.92418858757293  
 Ag 9.88238416181201 20.14318664074967 7.85683952114600  
 Ag 11.94452079903501 18.06562907420612 7.90425090729628  
 Ag 11.94451509296631 20.09581937876914 9.93440746688104  
 Ag 13.99530964198039 18.06890919395378 9.93116135427896  
 Ag 18.07157178521691 20.09641067734163 7.90359327408102  
 Ag 20.09638223868381 18.07157920437652 7.90359910783980  
 Ag 20.09638003678780 20.09640621322495 9.92842663517921  
 Ag 22.12207767490546 18.07784366502528 9.92215541742664  
 Ag 9.88505206680599 22.17905876551633 9.89374689501405  
 Ag 11.95113998022299 22.13787497199633 7.88537981452115  
 Ag 11.97558423824757 24.14712741391417 9.93861915895201  
 Ag 14.01078028778444 24.10723538066045 7.93526650082208  
 Ag 16.05115318820987 22.11537892235224 7.90581915210481  
 Ag 16.03422910418606 24.13839833823530 9.94637211527628  
 Ag 18.07786539642377 22.12210493643563 9.92212496685993  
 Ag 7.93532532307767 3.89273052854222 14.01073795735344  
 Ag 9.93864372964642 3.85283253340368 11.97554612686970  
 Ag 11.96501738264527 3.84192636934197 14.01334780969636  
 Ag 14.01157422666958 3.78905992283988 11.96775872100309  
 Ag 16.03223948868931 3.78904694825042 13.98843244280340  
 Ag 18.04860701107495 3.87474660076965 11.97739158374690  
 Ag 20.05795655009095 3.90154058156833 13.99927953746335  
 Ag 3.89272816363651 7.93521965378152 14.01074297700605

|    |                   |                   |                   |
|----|-------------------|-------------------|-------------------|
| Ag | 5.89821960156374  | 5.89816198131221  | 14.01567101823114 |
| Ag | 5.86205762185844  | 7.88532390134739  | 11.95108933531874 |
| Ag | 7.88536776910955  | 5.86207050799844  | 11.95109407399859 |
| Ag | 9.93437637935261  | 7.90419237862625  | 11.94447336481052 |
| Ag | 11.97650485711303 | 5.87034257629934  | 11.94095560638338 |
| Ag | 11.96311217630030 | 7.89252162994290  | 13.99892254784250 |
| Ag | 14.02195078275651 | 5.87274032355254  | 13.97806947456819 |
| Ag | 18.06447531618287 | 7.86947614230843  | 11.97034763165789 |
| Ag | 20.15543921653725 | 5.81663708262381  | 11.92391004648207 |
| Ag | 20.10180034056200 | 7.89815490381291  | 14.00000211863360 |
| Ag | 22.16126566961277 | 5.83884205971737  | 13.99999294953626 |
| Ag | 22.12444443333427 | 7.90584557319722  | 11.95182677595917 |
| Ag | 24.09849923942963 | 7.94207783068473  | 14.00072047064543 |
| Ag | 3.85279488953738  | 9.93858834483546  | 11.97553551968027 |
| Ag | 3.84192434200635  | 11.96496337756180 | 14.01335355539487 |
| Ag | 5.87031716497154  | 11.97647225188918 | 11.94097127369868 |
| Ag | 7.90416229454287  | 9.93437451253098  | 11.94447891779316 |
| Ag | 7.89250226619939  | 11.96309596364226 | 13.99892432780343 |
| Ag | 9.93111547715523  | 9.93113383566389  | 13.99528119507102 |
| Ag | 14.00003058237596 | 11.96842730290551 | 11.96841557114565 |
| Ag | 16.04080667965521 | 9.93318298150469  | 11.95923016849411 |
| Ag | 16.03163113868273 | 11.96843247430708 | 14.00001615273217 |
| Ag | 18.07242690968501 | 9.92758653464881  | 14.00001695460304 |
| Ag | 22.12962622152413 | 11.94101414417323 | 11.97649225596587 |
| Ag | 24.17360381643716 | 9.93941327949599  | 11.97168508620904 |
| Ag | 24.21080040922143 | 11.96778580380550 | 14.01152565355693 |
| Ag | 3.78904532178311  | 14.01156384487288 | 11.96779179140673 |
| Ag | 3.78905689738692  | 16.03223368727513 | 13.98843946284212 |
| Ag | 5.87273577489416  | 14.02193415956102 | 13.97807323049905 |
| Ag | 9.93318250519412  | 16.04080961258705 | 11.95925201186994 |
| Ag | 11.96841936402458 | 14.00005245029837 | 11.96842823965303 |
| Ag | 11.96841633425842 | 16.03166351778995 | 14.00002514227716 |
| Ag | 14.00002074229863 | 14.00004372833716 | 14.00004288519839 |
| Ag | 18.06248761351486 | 16.02409958853266 | 11.97595784873678 |
| Ag | 20.10743364299623 | 13.99894519064256 | 11.96310227052709 |
| Ag | 20.10741673941993 | 16.03693605832994 | 14.00108753603884 |
| Ag | 22.12714937558321 | 13.97808104163166 | 14.02193040351931 |
| Ag | 24.15792467003881 | 14.01337512719787 | 11.96498228682961 |
| Ag | 24.15791588590012 | 16.03500069402513 | 13.98661023184750 |
| Ag | 3.87471440336789  | 18.04860263283337 | 11.97740620677471 |
| Ag | 3.90147187021367  | 20.05796408052388 | 13.99927147301305 |
| Ag | 5.81667855944249  | 20.15532292320464 | 11.92389095495742 |
| Ag | 7.86949366398015  | 18.06445850536926 | 11.97037343653429 |
| Ag | 7.89825134136021  | 20.10174213752703 | 14.00000237107953 |
| Ag | 9.92758504932828  | 18.07246002969780 | 14.00002411015487 |
| Ag | 13.99893542694370 | 20.10751092518257 | 11.96310980047879 |
| Ag | 16.02405520281524 | 18.06255531332456 | 11.97595796904952 |
| Ag | 16.03691824310224 | 20.10750322164411 | 14.00109133412987 |
| Ag | 18.06884726280027 | 18.06890957378554 | 14.00473553395096 |
| Ag | 22.11533552399596 | 20.09411423443726 | 11.94885103513274 |
| Ag | 24.13844139132353 | 18.05357671789668 | 11.96577935335563 |
| Ag | 24.10717363450248 | 20.06463093180063 | 13.98921247894326 |
| Ag | 5.83912750759260  | 22.16081071833140 | 13.99999661324382 |
| Ag | 7.90586716484132  | 22.12446229334490 | 11.95177101729448 |
| Ag | 7.94197831993695  | 24.09844387011836 | 14.00069924239409 |
| Ag | 9.93940552315734  | 24.17365451287955 | 11.97168467703328 |
| Ag | 11.94097522638342 | 22.12965300095703 | 11.97649014940066 |
| Ag | 11.96779495526047 | 24.21086698810763 | 14.01153133749509 |
| Ag | 13.97808800895158 | 22.12722687061197 | 14.02193106395482 |
| Ag | 14.01338842757272 | 24.15797859264888 | 11.96497033077338 |
| Ag | 16.03502654291129 | 24.15798520925420 | 13.98661234513269 |
| Ag | 18.05361445452726 | 24.13840409959260 | 11.96576802427973 |



Ag 20.09414511040290 22.11538158421472 11.94884827452000  
 Ag 20.06471119843202 24.10725684300366 13.98921156571277  
 Ag 22.10176441532348 22.10176304947930 13.98427999106721  
 Ag 9.94640952760010 3.86156011603525 16.03418292794899  
 Ag 11.96580334943896 3.86155270236443 18.05358120782868  
 Ag 13.98665775142816 3.84191427297251 16.03499666803399  
 Ag 16.02445586478717 3.85278529332503 18.06137520883828  
 Ag 18.06058416204971 3.82627408167719 16.02830958467232  
 Ag 5.88465583087770 7.90587525047638 16.05114451812572  
 Ag 7.90583744495131 5.88458397160749 16.05111968341075  
 Ag 7.90360296130902 7.90359054624363 18.07151675755744  
 Ag 9.92215385983699 5.87785796390460 18.07784615933225  
 Ag 14.00110835554372 7.89250946189331 16.03690969312856  
 Ag 16.05905877984982 5.87031022138345 16.02351748187047  
 Ag 16.05553875858999 7.90416782347065 18.06564285164118  
 Ag 18.11498024038083 5.82087150516890 18.10627927877554  
 Ag 20.09414616729821 5.87549050352047 16.04815584962054  
 Ag 20.09839294818564 7.89620358051036 18.07584146732438  
 Ag 22.18332681905165 7.84455693925130 16.07609765058244  
 Ag 3.86155240457070 9.94634678239837 16.03419623420092  
 Ag 3.86154447081196 11.96577867299043 18.05358518232353  
 Ag 5.87786449413822 9.92214512884008 18.07785499503525  
 Ag 9.93747665190925 11.97594612573623 16.02407695869726  
 Ag 11.97594509709577 9.93748290131420 16.02407826745833  
 Ag 11.97595088634051 11.97595065174097 18.06253382373368  
 Ag 14.00475422128851 9.93111975487227 18.06888518943697  
 Ag 18.06686065387246 11.95924247066290 16.04079124142799  
 Ag 20.13048239881654 9.93551482705480 16.02966706196323  
 Ag 20.13047748936966 11.97034171625437 18.06448295191032  
 Ag 22.18295548111941 9.88738627674669 18.11261285024704  
 Ag 24.12516825639962 9.95140364730053 16.02257131338969  
 Ag 24.12516632682991 11.97741065168117 18.04857516734024  
 Ag 3.84192758938908 13.98663429368240 16.03499310477343  
 Ag 3.85277265166095 16.02444406819251 18.06136927159734  
 Ag 5.87030963202068 16.05905650812866 16.02351536971542  
 Ag 7.89249922667848 14.00110670417349 16.03691206731760  
 Ag 7.90417097113209 16.05553612888280 18.06561717727478  
 Ag 9.93111971375649 14.00475746188665 18.06887012437290  
 Ag 14.00002291667032 16.03166795516390 16.03163056105083  
 Ag 16.03161991848603 14.00005491430618 16.03162338943527  
 Ag 16.04077925828742 16.04081634981506 18.06684702679401  
 Ag 18.07241647146806 14.00001868995709 18.07243901149460  
 Ag 22.12961040207843 16.02351198874057 16.05899138202927  
 Ag 24.21079682641505 13.98844945357598 16.03218796589134  
 Ag 24.17360097454543 16.02829616963852 18.06055006792558  
 Ag 3.82627340888850 18.06060213066051 16.02830563767775  
 Ag 5.82087677286581 18.11497491076682 18.10625503851410  
 Ag 5.87547780029459 20.09412105082134 16.04821931439588  
 Ag 7.89622254863407 20.09839442381326 18.07583226289077  
 Ag 9.93554726754523 20.13052360403712 16.02966186469142  
 Ag 11.95922825789894 18.06689240649504 16.04079611031115  
 Ag 11.97035509559357 20.13052883505682 18.06445492373752  
 Ag 14.00001038567185 18.07247029433568 18.07242995205631  
 Ag 18.06561017588240 20.09582428477093 16.05551448807171  
 Ag 20.09575375401472 18.06563996444452 16.05551617516564  
 Ag 20.14317187050054 20.14320566164229 18.11763428707022  
 Ag 22.17902238364390 18.10626525997505 18.11492945897253  
 Ag 22.13786001847286 20.11459488103973 16.04886092279136  
 Ag 24.14718003564181 18.06133462477026 16.02441164347312  
 Ag 7.84465178017907 22.18330100703484 16.07610222271821  
 Ag 9.88740873719610 22.18301072836898 18.11259638786652  
 Ag 9.95138711105105 24.12525188530885 16.02256120090567

Ag 11.97742689537698 24.12527519275283 18.04859079005074  
 Ag 13.98846426932602 24.21087864836596 16.03219669490162  
 Ag 16.02351890891653 22.12965333093214 16.05903559057953  
 Ag 16.02831951476186 24.17367694718468 18.06057328135703  
 Ag 18.10626530009949 22.17907887673896 18.11494723431481  
 Ag 18.06138433342375 24.14714099434440 16.02441565672556  
 Ag 20.11462728127142 22.13790918512353 16.04886750281069  
 Ag 13.98925180288191 3.89270209242712 20.06466993561613  
 Ag 9.92848301270815 7.90359116832788 20.09637348231583  
 Ag 11.94888649537195 5.88457450356609 20.09415012704370  
 Ag 11.94887407645407 7.90579225263679 22.11536576174406  
 Ag 13.98433510775988 5.89814727322075 22.10176460680659  
 Ag 16.04891139250626 5.86203112920013 20.11463975602463  
 Ag 16.04891212744855 7.88530986602267 22.13791550050449  
 Ag 18.11766037097556 7.85677440393591 20.14320676526251  
 Ag 5.88458702922766 11.94888214845066 20.09415631696893  
 Ag 7.90360640547266 9.92847076456548 20.09637027419372  
 Ag 7.90582387841936 11.94887990038245 22.11535091646981  
 Ag 9.92214626381382 9.92214775557394 22.12206867033734  
 Ag 14.00110392414331 11.96309357912135 20.10747420548179  
 Ag 16.05553399518946 9.93435638619612 20.09581759695606  
 Ag 16.05900296022422 11.97649027792234 22.12967585398206  
 Ag 18.11497923032820 9.89371808884255 22.17909491160017  
 Ag 20.09838842971447 9.92414876457426 20.10377496924301  
 Ag 20.09416965813389 11.95183711343493 22.12447978730534  
 Ag 22.18332167863674 11.92391282217573 20.15542408350645  
 Ag 3.89270007747053 13.98923471165132 20.06468053241988  
 Ag 5.89819478450146 13.98432355398323 22.10176191392546  
 Ag 5.86204906818020 16.04889694701757 20.11461846012276  
 Ag 7.88536306448934 16.04889446448416 22.13788768127999  
 Ag 9.93438538264334 16.05553825312172 20.09579704240554  
 Ag 11.96310912609441 14.00110719744383 20.10747045206661  
 Ag 11.97652152935900 16.05901586433158 22.12966165724842  
 Ag 14.02194815891101 14.02193661757402 22.12721159439403  
 Ag 18.06443611581994 16.02965832552501 20.13050304560667  
 Ag 20.10177903175524 13.99999460930526 20.10181823375362  
 Ag 20.15535536738261 16.07606600882395 22.18327951735356  
 Ag 22.16122674341168 14.00012003183425 22.16115913174194  
 Ag 22.12441894120487 16.04818837575665 20.09411226690563  
 Ag 24.09840298524522 13.99928294354161 20.05791837835597  
 Ag 7.85680619672800 18.11764631114093 20.14317742673963  
 Ag 9.89375412433142 18.11497812159267 22.17906234890001  
 Ag 9.92417145329895 20.09840356750003 20.10375988122415  
 Ag 11.95178407677276 20.09414392674623 22.12448048505212  
 Ag 14.00000985897885 20.10175069384770 20.10173181442876  
 Ag 16.02964490145468 18.06447672509812 20.13050213436776  
 Ag 16.07611636436044 20.15534796543995 22.18329712127948  
 Ag 18.11259492974749 18.11261108361248 22.18297326196379  
 Ag 18.07582975150362 20.10378050309093 20.09838054648078  
 Ag 20.10373643875905 18.07585152321970 20.09837894506139  
 Ag 11.92390570335769 22.18332836744852 20.15533177416386  
 Ag 14.00001296997607 22.16085239590805 22.16082579223209  
 Ag 13.99930050744002 24.09848799890848 20.05797352148647  
 Ag 16.04822271407316 22.12449326594023 20.09410492890903  
 Ag 13.98925505780797 7.93523032972610 24.10723143252489  
 Ag 9.94640983573551 11.96578915979421 24.13836514927920  
 Ag 11.96579906783082 9.94635829497720 24.13836696027613  
 Ag 13.98664567012726 11.96496338094746 24.15800274907830  
 Ag 16.02445556472444 9.93859514182361 24.14714691186298  
 Ag 18.06057713205782 11.97174718072533 24.17364656474647  
 Ag 7.93530639921293 13.98923916230498 24.10722004875738  
 Ag 9.93864327272871 16.02442926440199 24.14712582666538

|    |                   |                   |                   |
|----|-------------------|-------------------|-------------------|
| Ag | 11.96501423328963 | 13.98662770649377 | 24.15798934070156 |
| Ag | 14.01156632703804 | 16.03223364128542 | 24.21087476682775 |
| Ag | 16.03221323199930 | 14.01156376902135 | 24.21089447740265 |
| Ag | 18.04859293863425 | 16.02258461046372 | 24.12523900686700 |
| Ag | 20.05800050011867 | 14.00072633644752 | 24.09842755373237 |
| Ag | 11.97170989958587 | 18.06060478052575 | 24.17367119519932 |
| Ag | 14.00072436826094 | 20.05799648926866 | 24.09846761903380 |
| Ag | 16.02258204502613 | 18.04861132697314 | 24.12524249840997 |

**Pd<sub>110</sub>Ag<sub>295</sub>qL<sub>1</sub>-1323.767**

|    |                   |                   |                   |
|----|-------------------|-------------------|-------------------|
| Pd | 11.97694474908826 | 11.97515684125742 | 5.86667613875559  |
| Pd | 14.00475256477952 | 9.94758331515089  | 5.86095713216095  |
| Pd | 9.95959630911236  | 14.00603302259563 | 5.86773470021689  |
| Pd | 16.03177103223818 | 16.05040864917797 | 5.88253233709476  |
| Pd | 18.07223502731230 | 14.01937106111054 | 5.87177033598357  |
| Pd | 14.01673003267441 | 18.04697017432012 | 5.88640912966752  |
| Pd | 11.95706172674834 | 7.91821531616905  | 9.94513892359235  |
| Pd | 13.99659969932084 | 5.85917007053074  | 9.95301692917699  |
| Pd | 7.92041071851651  | 11.95688774468195 | 9.94523118297709  |
| Pd | 9.93553226226888  | 9.93403096684835  | 9.94239231742448  |
| Pd | 14.00167656395939 | 11.96215134856363 | 7.91950344876605  |
| Pd | 16.04225650226112 | 9.94299958217100  | 7.91683902937448  |
| Pd | 16.02534456918277 | 11.98123293092254 | 9.93605268266794  |
| Pd | 18.06222727107847 | 9.94185982245197  | 9.93275826303013  |
| Pd | 5.85944452615949  | 13.99565585380897 | 9.95411708515316  |
| Pd | 9.93519402527638  | 16.04541192100834 | 7.91492243664710  |
| Pd | 11.98042361485905 | 14.01614018096302 | 7.92287134470068  |
| Pd | 11.98539633708732 | 16.02771149804390 | 9.92542133292741  |
| Pd | 13.99854296219987 | 14.01151282345466 | 9.90551265183303  |
| Pd | 18.07177755675977 | 16.04380224525844 | 7.92070328024924  |
| Pd | 20.09021293706535 | 14.00936813994009 | 7.90630242392257  |
| Pd | 20.08531889959425 | 16.04565470148557 | 9.93345344794851  |
| Pd | 22.13396107358912 | 14.01084050146179 | 9.92230995022624  |
| Pd | 9.94421983233248  | 18.06098940236030 | 9.93127536745262  |
| Pd | 14.00823229711837 | 20.09390078773397 | 7.90853057658633  |
| Pd | 16.03682566980915 | 18.04206472321522 | 7.90960585676090  |
| Pd | 16.03640750234090 | 20.08013642801925 | 9.91836008608671  |
| Pd | 18.07096968130816 | 18.06120959085786 | 9.91611727552207  |
| Pd | 14.01061430634014 | 22.13857775954626 | 9.91826812830947  |
| Pd | 7.90980571796703  | 7.91120223503544  | 14.01611136403244 |
| Pd | 9.92151441810793  | 5.86852979736842  | 14.01649121043263 |
| Pd | 13.99828926224980 | 7.92096221205169  | 11.96818284645586 |
| Pd | 16.02830190258596 | 5.85974167717726  | 11.97182682710675 |
| Pd | 16.02932935768714 | 7.92339251016831  | 13.99857839112314 |
| Pd | 18.04580760793186 | 5.85994675325993  | 14.00468019792366 |
| Pd | 5.86801786102733  | 9.92185938479935  | 14.01603379534048 |
| Pd | 9.93910247778598  | 11.97221729431500 | 11.97487295732602 |
| Pd | 11.97216034506942 | 9.93817189325630  | 11.97645527201278 |
| Pd | 11.96540724115514 | 11.96647035326559 | 13.99750843926865 |
| Pd | 13.99972134910368 | 9.92430221773762  | 13.99679002065040 |
| Pd | 18.05870238437375 | 11.97896933812358 | 11.96874184812671 |
| Pd | 20.08046255842057 | 9.94553797880261  | 11.95675592980297 |
| Pd | 20.07733895039478 | 11.97113024844244 | 13.99821988885469 |
| Pd | 22.14077572381844 | 9.95114185751925  | 13.99596888423407 |
| Pd | 5.85888979236998  | 16.02867102982556 | 11.97233399916146 |
| Pd | 7.92418394486651  | 13.99897450569806 | 11.96805073757503 |
| Pd | 7.92324529975333  | 16.03109942332128 | 13.99862222651728 |
| Pd | 9.92279934386355  | 14.00048109464068 | 13.99765591989912 |
| Pd | 13.99850658094403 | 16.03403341006070 | 11.97228784001734 |
| Pd | 16.03019356726277 | 14.00550798574010 | 11.96235171265827 |
| Pd | 16.03441608578283 | 16.03517358033408 | 13.99976764416474 |
| Pd | 18.07633726722060 | 14.00099318452940 | 13.99868114026936 |

Pd 22.13222149182933 16.04772571077287 11.94997646153866  
Pd 5.86067498798354 18.04622272925709 14.00282372521775  
Pd 9.94675087336125 20.08151252035786 11.95637668401428  
Pd 11.98016476522615 18.05942761241736 11.96720543763987  
Pd 11.96959533335481 20.07733395628113 13.99672906257908  
Pd 13.99843744816707 18.08008797329028 14.00099884229311  
Pd 13.99225324935566 16.03310280096020 7.90318369545342  
Pd 20.08963718555855 18.05072614937827 11.94587586290203  
Pd 20.11118046136780 20.08520162509858 13.99437042675945  
Pd 22.13594557673820 18.07281368784369 13.98558611423277  
Pd 9.95340802431079 22.14017057211215 13.99554001938241  
Pd 16.03614006594785 22.14113980407906 11.94392734266559  
Pd 18.07851390022183 22.15197556194844 13.99853339086965  
Pd 9.93809087244804 7.92102199481683 16.04854915434007  
Pd 11.94818462452274 5.87232669847360 16.04999792522408  
Pd 11.95021509912193 7.92166844142875 18.06080755207798  
Pd 13.98307582117533 5.86988948292196 18.07452097768028  
Pd 18.05350610978892 7.92047642591972 16.04246534379518  
Pd 5.87191393310918 11.94898951867584 16.05139506046814  
Pd 7.92003946848411 9.93611958651341 16.04846898510620  
Pd 7.92109533574973 11.94985142359185 18.06050698355349  
Pd 9.92942078068719 9.92853677125613 18.06817593230879  
Pd 13.99951876191062 11.96519514873200 16.03519686093954  
Pd 16.02220147847390 9.94020345476171 16.02802748662044  
Pd 16.02238590944481 11.97085459998081 18.06238070969669  
Pd 18.05835424357990 9.93621761735358 18.06575837459262  
Pd 22.14054910683758 11.97071124890618 16.02795627010294  
Pd 5.86872220618533 13.98361959076661 18.07474094556683  
Pd 9.93753561582745 16.02250769927208 16.02872446007991  
Pd 11.96540395044334 13.99813262167113 16.03445301272717  
Pd 11.97054286008272 16.02191093406846 18.06264690879452  
Pd 13.99924982703316 14.00028027265366 18.08049598290657  
Pd 18.06257336792827 16.02552367424575 16.02777004077086  
Pd 20.07842926356947 14.00016962652062 16.03119396649789  
Pd 20.08278785364384 16.04238351336412 18.05560484985944  
Pd 22.13975417212782 14.00365705200752 18.04768601968301  
Pd 7.91939906807212 18.05456308716203 16.04229447787296  
Pd 9.93424794323684 18.05818656716796 18.06615649174275  
Pd 13.99711038284715 20.07959910502446 16.03616954606791  
Pd 16.02866231290136 18.06371180352450 16.02516183281308  
Pd 16.04408188581269 20.08199991366839 18.05240664481721  
Pd 18.06447263594113 18.06585641372835 18.05555250679309  
Pd 11.97185152414629 22.14125996379627 16.02905506333672  
Pd 14.00357786318888 22.14320606103941 18.04973145468430  
Pd 13.98424012686656 7.90976177684306 20.08990817867995  
Pd 9.93949745303124 11.94962991636975 20.07880693440677  
Pd 11.95020493763698 9.93868794858489 20.07987543729696  
Pd 11.94838335824151 11.94744451205436 22.13176136974521  
Pd 13.98304088385217 9.92045753481697 22.13489922028409  
Pd 18.05448571281328 11.95596341635343 20.08260308570801  
Pd 7.91137979093822 13.98313327410758 20.08701423749407  
Pd 9.92438358364717 13.98260276155844 22.13339504671016  
Pd 13.99805855547101 16.03133925527007 20.07939360684248  
Pd 16.02946211711902 13.99779552477174 20.07988259493875  
Pd 16.02812870992155 16.02874159995222 22.14217960742629  
Pd 18.04591970383692 13.99669730630946 22.14018479607984  
Pd 11.95626132433839 18.05551648638979 20.08331712729457  
Pd 13.99665088319564 18.04992768983902 22.14177987199844  
Ag 11.92304894330890 7.84327263845604 5.81642267230573  
Ag 13.99955134498371 5.83723862245742 5.83769614145540  
Ag 13.99912020775186 7.93923700274318 3.89929206983303  
Ag 16.04887569238605 7.90172600094727 5.87241641282300

Ag 7.84734884033197 11.92338334302671 5.82062665498813  
 Ag 9.88804989375999 9.88689460314083 5.82016151600779  
 Ag 9.95586087156375 11.97754271530555 3.88182121398427  
 Ag 11.97953020399170 9.95376131691866 3.88065400820826  
 Ag 13.98987889954944 11.97228974102052 3.80254474430016  
 Ag 16.02722653138424 9.93752214551068 3.82714771110715  
 Ag 16.01954685200759 11.94272154404442 5.87414330855923  
 Ag 18.10438531201517 9.88257632044055 5.82144416616458  
 Ag 18.05491094283148 11.97696380287491 3.85842621882280  
 Ag 20.10925128701361 11.95088824665921 5.86386785290132  
 Ag 5.83897378392071 14.00004896676342 5.83852018448396  
 Ag 7.95140322061180 13.99920370474207 3.90814453470527  
 Ag 7.90124548720555 16.04942779308866 5.87372341325535  
 Ag 9.94989886533495 16.02511903067135 3.83799351536145  
 Ag 11.97286172735244 13.98834392571709 3.79862509269867  
 Ag 11.95785433751902 16.02561979820314 5.88357046394251  
 Ag 13.98035041243693 13.99671572200926 5.88604575950180  
 Ag 14.01049361160771 16.03317529808297 3.82894601791667  
 Ag 16.02892929269087 14.01517725225141 3.84736765183700  
 Ag 18.04335617834288 16.03330874082102 3.87492828033998  
 Ag 20.06019147034496 14.00654117987268 3.89585164012854  
 Ag 20.09689347674224 16.04899599486479 5.88391082138773  
 Ag 22.10233557580989 14.01296693356935 5.89174018447077  
 Ag 9.88441957069933 18.10492405800751 5.82591140494439  
 Ag 11.97353928434017 18.05647533109087 3.85945341796044  
 Ag 11.95437239990181 20.10078514984134 5.87200546467117  
 Ag 14.01084537799202 20.03423869810399 3.90939269432206  
 Ag 16.03403937504764 18.04513222095359 3.87060128702234  
 Ag 16.04369678064084 20.08022658551126 5.89748450845970  
 Ag 18.07409443689062 18.07105679712980 5.88845963070788  
 Ag 14.01308503060065 22.09940459635927 5.89523386129880  
 Ag 11.97173751577969 3.82896878270668 9.93911792821976  
 Ag 14.00055797970067 3.90182023193724 7.94009868938231  
 Ag 16.02326263114147 3.87674194307806 9.95036135866668  
 Ag 7.85563980481364 7.85469246378539 9.88147715311285  
 Ag 9.89084027372029 5.82337897997634 9.88352676130403  
 Ag 9.92314618846041 7.89517337924581 7.90003731772028  
 Ag 11.95156729754234 5.87534472754936 7.90528314177227  
 Ag 14.00057372048681 7.89701796359391 7.89911232744787  
 Ag 16.07793634998021 5.81460343950610 7.84315374322230  
 Ag 16.03111035056511 7.86885291154095 9.93558950271709  
 Ag 18.11474556840766 5.81805388693796 9.88485721579752  
 Ag 18.07647963423039 7.89808043040990 7.89313988407845  
 Ag 20.10266489139179 7.90137140042506 9.92320907084554  
 Ag 3.82749732561645 11.97061444546724 9.93855936375133  
 Ag 5.82397119956653 9.89202101048312 9.88408654801712  
 Ag 5.87612477821018 11.95088118171901 7.90540567855714  
 Ag 7.89856411267968 9.92481948726695 7.90027406379319  
 Ag 9.94102976705348 11.97202728478279 7.87344543736445  
 Ag 11.96953310040671 9.93402297938487 7.87024373541843  
 Ag 11.96280754629539 11.96448040374050 9.92965221839232  
 Ag 14.00020067878591 9.92813414627208 9.92758430573260  
 Ag 18.05690248859626 11.94760406205982 7.90591574069013  
 Ag 20.13733345844950 9.88404951012858 7.85699411195370  
 Ag 20.09022646983744 11.94488688509394 9.93485663538563  
 Ag 22.17476287274160 9.88484383045561 9.89365018995988  
 Ag 22.13469050484617 11.95045435282503 7.88609817943625  
 Ag 24.14766788628402 11.97370282095502 9.93618435552133  
 Ag 3.90329607493045 14.00012566350075 7.94249671860939  
 Ag 3.87660441715441 16.02332114148909 9.95140877281637  
 Ag 5.81516305212368 16.07765668712191 7.84381178747337  
 Ag 7.89791594910650 13.99913839024026 7.90009257705852

Ag 7.86723932846018 16.03041971262091 9.93607727327437  
 Ag 9.93126057819727 14.00409841785721 9.92493796944499  
 Ag 18.06428540880202 20.09160178371673 11.95927542197900  
 Ag 16.02461653617324 14.01117498063145 7.89164111011996  
 Ag 16.01426613204487 16.02428178545442 9.92498825390854  
 Ag 18.06444182866429 13.99841161328186 9.92975845746729  
 Ag 22.11464371832146 16.04602563875924 7.90247878449408  
 Ag 24.10550446648831 14.00773366635333 7.92979237477580  
 Ag 24.13482172958291 16.03100381067590 9.94489041094256  
 Ag 5.81684810533122 18.11479949174624 9.88585278561056  
 Ag 7.89477526667984 18.07867220419400 7.89409785521058  
 Ag 7.90087449145520 20.10264679997405 9.92274051308006  
 Ag 9.88603197388530 20.13399938085975 7.86024280842992  
 Ag 11.95599706896887 18.05072576388689 7.90294384777162  
 Ag 11.94580007278618 20.09072213216521 9.93324539934426  
 Ag 13.99446196481298 18.05595914513661 9.91720203251471  
 Ag 18.06726060485496 20.09171563124761 7.90950039130455  
 Ag 20.10231283106035 18.07189557250360 7.89860790075951  
 Ag 20.12012040532193 20.11398173253944 9.90939877660348  
 Ag 22.12408370631820 18.07655373895282 9.92001238102871  
 Ag 9.88438781524780 22.17597768972870 9.89283937262073  
 Ag 11.94870255721806 22.13956511119004 7.88331814079109  
 Ag 11.97395049000885 24.14879640295616 9.93356289651964  
 Ag 14.00619602890325 24.11065672942953 7.92454532941487  
 Ag 16.04712360354213 22.11770106814805 7.89825063732374  
 Ag 16.02750661558906 22.14285905318998 9.94112415452004  
 Ag 18.08680021471451 22.14419000586122 9.90244712967697  
 Ag 7.93305132459514 3.89270379798817 14.01011674741160  
 Ag 9.93755829934745 3.85748624891153 11.97626510279991  
 Ag 11.96360632320666 3.84488946995963 14.01333357630730  
 Ag 14.01106802591069 3.79075238759609 11.96768624822298  
 Ag 16.03177073512542 3.78941468133471 13.98844363487944  
 Ag 18.04931500037592 3.87704094223965 11.97670168282988  
 Ag 20.05967606180051 3.90456397481467 13.99792512797998  
 Ag 3.89366718461612 7.93437518529041 14.01004531557369  
 Ag 5.89771411735845 5.89773301522092 14.01505846634930  
 Ag 5.86438398705384 7.88594409453748 11.94983369237503  
 Ag 7.88447725630108 5.86311496979069 11.94988520452484  
 Ag 9.93484258033188 7.90508814237973 11.94376331865348  
 Ag 11.97549386470486 5.87193298668662 11.94018310636291  
 Ag 11.96309812086635 7.89346019822806 13.99734816984503  
 Ag 14.02090883400366 5.87172479471714 13.97828880758980  
 Ag 18.06347746225640 7.87041403769383 11.96872321226546  
 Ag 20.15593283781454 5.81798604005753 11.92205505886758  
 Ag 20.09995053595085 7.89844700568928 13.99956038474847  
 Ag 22.16290272066371 5.83744262607661 14.00015614653193  
 Ag 22.12448967007030 7.90573384516438 11.95140648984973  
 Ag 24.09964741300371 7.93983168978537 13.99978856836283  
 Ag 3.85653158711498 9.93768439096791 11.97518602537567  
 Ag 3.84427643559012 11.96365334349866 14.01249251704055  
 Ag 5.87153691392233 11.97628223524331 11.93982246001762  
 Ag 7.90658008064784 9.93541996788898 11.94372006184620  
 Ag 7.89323446586856 11.96339627423873 13.99709532228041  
 Ag 9.93223482954267 9.93293746117378 13.99350970258469  
 Ag 13.99893078577070 11.97235716827271 11.96191910388277  
 Ag 16.03923396779308 9.93496247608275 11.95743079692862  
 Ag 16.03200530435934 11.96916117682210 13.99716372126803  
 Ag 18.07092126039528 9.92962507910043 13.99856469393647  
 Ag 22.12763911285722 11.94048971535889 11.97535904813425  
 Ag 24.17143136231337 9.93828847569943 11.97201034726688  
 Ag 24.20987118411119 11.96571682215168 14.01203103890609  
 Ag 3.78883558252141 14.01143112167982 11.96715261217179

Ag 3.78846719993771 16.03172939172132 13.98734628644788  
 Ag 5.87168509845492 14.02153495160132 13.97619176161809  
 Ag 9.93648350048992 16.04006937195324 11.95552179230744  
 Ag 11.96973977535006 14.00411811304434 11.96173962903656  
 Ag 11.96631871347715 16.03198551503599 14.00099990277967  
 Ag 13.99897113274072 13.99929674188624 14.00129959804782  
 Ag 18.05950071497395 16.02898526788097 11.96944547403284  
 Ag 20.10447038173938 13.99888566946348 11.96242497647862  
 Ag 20.10825236223381 16.03368429991787 14.00273173524923  
 Ag 22.12916874060333 13.97651433243194 14.02229128296668  
 Ag 24.15612368497675 14.00997117574470 11.96420469876317  
 Ag 24.16060880495945 16.03164053851087 13.98683713973473  
 Ag 3.87648246369252 18.04996473218501 11.97680434240868  
 Ag 3.90276069849537 20.05884490083675 13.99918429924635  
 Ag 5.81762833423551 20.15566680627233 11.92279615786759  
 Ag 7.87213117745704 18.06356876824377 11.96670814722184  
 Ag 7.89965912408112 20.10032440643864 13.99935217082501  
 Ag 9.93025220578631 18.07090167733640 13.99738047376848  
 Ag 14.00108465262067 20.10475155283379 11.95654958355006  
 Ag 16.01484621199872 18.05403816644961 11.97003832122934  
 Ag 16.02339253751033 20.11346673215721 14.01461770758907  
 Ag 18.06995588340867 18.05828857681848 14.01603567959943  
 Ag 22.11150388345644 20.09712628708177 11.94886522942539  
 Ag 24.13543255516984 18.05236051464593 11.96677381527413  
 Ag 24.10658898035419 20.06450770285307 13.99191547097413  
 Ag 5.83813469791982 22.16239667396527 14.00004670095358  
 Ag 7.90509510038909 22.12333366763572 11.95035234715011  
 Ag 7.94006009749960 24.09693063149253 14.00017090514140  
 Ag 9.93662894571912 24.16938748767511 11.97138780972527  
 Ag 11.94232266317302 22.12895481708339 11.97344685376353  
 Ag 11.96603259007829 24.21122430341329 14.01171222312770  
 Ag 13.97470094349794 22.13177387643802 14.02179140020008  
 Ag 14.00535578982935 24.16473484875891 11.96370327501580  
 Ag 16.03260382524155 24.16098147244195 13.98841428295602  
 Ag 18.05418781397596 24.12808417081963 11.96383028135773  
 Ag 20.12700857056796 22.14974502167085 11.93675735446370  
 Ag 20.06557796038848 24.11662436025289 13.99610560026762  
 Ag 22.10921155405972 22.10536459885137 13.99204583108478  
 Ag 9.94455357731325 3.86507208027463 16.03346286435755  
 Ag 11.96615867949805 3.86532414741387 18.05232238802322  
 Ag 13.98623042827339 3.84330332644593 16.03378185598504  
 Ag 16.02268472108943 3.85802049318916 18.05940467541794  
 Ag 18.05970568468516 3.82850277546092 16.02707060836128  
 Ag 5.88430376704434 7.90306378496004 16.05149889739407  
 Ag 7.90390986587973 5.88522349251303 16.05073538776175  
 Ag 7.90152296521413 7.90204491396449 18.07181977502633  
 Ag 9.92162385768439 5.88150266175970 18.07718037600608  
 Ag 14.00166354519842 7.89533146285792 16.03432094279698  
 Ag 16.05864656282625 5.87290687775405 16.02260227808205  
 Ag 16.05589170809538 7.90710485487287 18.06410777949014  
 Ag 18.11552233110896 5.82527738878667 18.10657775655942  
 Ag 20.09526002909655 5.87598580652005 16.04882077393315  
 Ag 20.09957971187612 7.89627686158678 18.07670464559300  
 Ag 22.18339264639776 7.84319008303896 16.07602552993647  
 Ag 3.86566894493467 9.94531214160921 16.03428971263815  
 Ag 3.86397021364623 11.96485614724412 18.05367775091696  
 Ag 5.87928516524329 9.92047751788120 18.07757953051165  
 Ag 9.93816626465453 11.97485994128782 16.02282105201980  
 Ag 11.97565918404936 9.93956675952970 16.02252776500005  
 Ag 11.97586959200614 11.97459807137939 18.06104647371535  
 Ag 14.00417915478872 9.93201087746729 18.06867759526062  
 Ag 18.06649865096441 11.96033227809575 16.03916400194961

Ag 20.12993580745962 9.93614212873439 16.02969930535016  
 Ag 20.13032796647916 11.96849069902764 18.06410369356616  
 Ag 22.18083620804243 9.88479361233195 18.11418243816853  
 Ag 24.12408880081434 9.94954424140748 16.02296680882211  
 Ag 24.12290855631727 11.97510454491617 18.04956748314569  
 Ag 3.84569210643634 13.98525624517936 16.03408142214753  
 Ag 3.85746583675793 16.02395567898736 18.06057506943164  
 Ag 5.87218948312989 16.05845009465288 16.02239921955670  
 Ag 7.89336457063350 14.00137063850239 16.03355863950490  
 Ag 7.90642031561827 16.05527838169384 18.06344047554176  
 Ag 9.93276504377200 14.00319627258264 18.06712871571641  
 Ag 14.00012243080596 16.03277835336154 16.03301366738643  
 Ag 16.03238174217427 13.99934709028435 16.03340943281626  
 Ag 16.03910131167796 16.03958101433501 18.06843157528040  
 Ag 18.07147277652664 13.99843671036668 18.07301725757219  
 Ag 22.13181569760843 16.02341400688583 16.06014004526759  
 Ag 24.21196769194051 13.98592579293851 16.03402857420550  
 Ag 24.17469181879984 16.02571978126155 18.06173367822140  
 Ag 3.82972296784732 18.06053558729280 16.02651519351402  
 Ag 5.82390192244131 18.11603030107067 18.10645565009602  
 Ag 5.87634965399976 20.09559343971665 16.04781809419794  
 Ag 7.89634488245412 20.09916934599202 18.07659487040418  
 Ag 9.93658099486055 20.13035409645659 16.02982111182703  
 Ag 11.95890160668364 18.06629526752269 16.04153788862492  
 Ag 11.96764506630363 20.13145091840950 18.06560504387702  
 Ag 13.99834392690605 18.07127276363748 18.07361225451069  
 Ag 18.06839054397411 20.09904846015450 16.05272351503800  
 Ag 20.09888998039582 18.06452626124731 16.05862712344210  
 Ag 20.14374135150496 20.14402011150058 18.11755475877086  
 Ag 22.17923248069204 18.10716545515204 18.11760473921040  
 Ag 22.14707382860832 20.11447270689742 16.05609045869852  
 Ag 24.14968797498650 18.06183052767327 16.02491063184991  
 Ag 7.84391791013027 22.18291768383264 16.07654801224875  
 Ag 9.88487742462833 22.18163843384119 18.11449529655812  
 Ag 9.95034265406242 24.12293995558119 16.02318100642596  
 Ag 11.97582069291436 24.12435586485943 18.05134496472382  
 Ag 13.98567298623177 24.21296665693093 16.03470992993971  
 Ag 16.02342469780415 22.13638058133832 16.06223731850459  
 Ag 16.02878454114892 24.17731226153105 18.06378262976931  
 Ag 18.10791220992090 22.18213116675217 18.11610901576388  
 Ag 18.06180971795040 24.15864064700977 16.03681617789691  
 Ag 20.11910352539237 22.14525002306183 16.05404486586046  
 Ag 13.98944680229068 3.89719894237411 20.06381476053763  
 Ag 9.92873526714855 7.90355570284436 20.09617617841984  
 Ag 11.94958019568961 5.88710196529140 20.09388675757449  
 Ag 11.95008889771688 7.90470999560551 22.11445354605696  
 Ag 13.98469314838522 5.89584508946832 22.10390502486655  
 Ag 16.04904768223919 5.86454651742031 20.11331270406152  
 Ag 16.04694288297977 7.88573932135581 22.13637021965528  
 Ag 18.11817250291859 7.85746490430843 20.14340725710936  
 Ag 5.88709082348847 11.94935736192790 20.09274245509548  
 Ag 7.90538217564152 9.92851639840119 20.09446544253039  
 Ag 7.90786797656487 11.94993005848326 22.11279992872476  
 Ag 9.92316020351518 9.92191416256576 22.11985848286312  
 Ag 14.00140903073242 11.96260610127331 20.10930672007605  
 Ag 16.05589164973049 9.93516105268905 20.09534601392495  
 Ag 16.05845284993931 11.97427584585772 22.13062955144109  
 Ag 18.11606125779733 9.89109871199223 22.17930069514344  
 Ag 20.09995204715923 9.92197702436007 20.10563837600754  
 Ag 20.09332920773546 11.95007394158886 22.12601017983625  
 Ag 22.18198628292083 11.92138861774281 20.15590877572060  
 Ag 3.89565158775145 13.98771830257827 20.06331007243863



|    |                   |                   |                   |
|----|-------------------|-------------------|-------------------|
| Ag | 5.89911489129961  | 13.98342858292250 | 22.10136385192945 |
| Ag | 5.86644824573298  | 16.04679108879400 | 20.11187361762494 |
| Ag | 7.88758502338657  | 16.04681327350903 | 22.13489453477129 |
| Ag | 9.93617488359788  | 16.05569072336558 | 20.09433575039886 |
| Ag | 11.96408307873154 | 14.00087154506899 | 20.10874191967721 |
| Ag | 11.97664384687898 | 16.05987459605656 | 22.12979966662069 |
| Ag | 14.02190370110201 | 14.02104538840112 | 22.12954591719909 |
| Ag | 18.06306220566158 | 16.03087638619798 | 20.12952071933147 |
| Ag | 20.10082519319557 | 13.99908911422323 | 20.10158239108768 |
| Ag | 20.15406352706087 | 16.07724107877165 | 22.18363290087298 |
| Ag | 22.15887400337438 | 13.99916010504986 | 22.16115091284058 |
| Ag | 22.12515748944274 | 16.04839248511615 | 20.09599903572795 |
| Ag | 24.09673764276251 | 13.99804286051464 | 20.05815631427059 |
| Ag | 7.85811000706684  | 18.11926190733719 | 20.14416835378019 |
| Ag | 9.89204864630796  | 18.11709116027682 | 22.17912627726168 |
| Ag | 9.92201208414485  | 20.10069655814490 | 20.10691180318179 |
| Ag | 11.95161681089773 | 20.09553310363096 | 22.12647732956964 |
| Ag | 14.00017855894879 | 20.10236947441766 | 20.10085895840034 |
| Ag | 16.02982673007585 | 18.06416662832418 | 20.13072026194343 |
| Ag | 16.07694250340545 | 20.15568874288176 | 22.18451928253740 |
| Ag | 18.11311150619909 | 18.11451320715016 | 22.18307949994988 |
| Ag | 18.07553807297025 | 20.10435397291233 | 20.09752434084678 |
| Ag | 20.10290676179311 | 18.07594413317705 | 20.09859951464428 |
| Ag | 11.92168634927781 | 22.18438805440255 | 20.15728048331724 |
| Ag | 13.99977917057260 | 22.16193425638371 | 22.16284412217798 |
| Ag | 13.99895551311605 | 24.09907453268774 | 20.06287032965225 |
| Ag | 16.04780168871214 | 22.12519705717855 | 20.09527124778101 |
| Ag | 13.98844761750947 | 7.92738520155357  | 24.10958076929697 |
| Ag | 9.94642031067235  | 11.96494285197772 | 24.13916482403821 |
| Ag | 11.96663101044232 | 9.94298115812687  | 24.13864409378434 |
| Ag | 13.98653977220206 | 11.96318481948388 | 24.15737611010213 |
| Ag | 16.02320137245840 | 9.93570829257902  | 24.14706501410949 |
| Ag | 18.05900522087769 | 11.96917072042797 | 24.17281484059318 |
| Ag | 7.93424972851934  | 13.98801010159181 | 24.10618112323563 |
| Ag | 9.93936914880049  | 16.02365511053410 | 24.14526438840460 |
| Ag | 11.96601093604058 | 13.98581849471731 | 24.15771909360760 |
| Ag | 14.01178775798569 | 16.03316227396581 | 24.20893375397233 |
| Ag | 16.03246162394404 | 14.01101815698079 | 24.21165276926864 |
| Ag | 18.04732854962482 | 16.02366225221238 | 24.12648944232162 |
| Ag | 20.05271319883989 | 13.99988047957560 | 24.09870636319329 |
| Ag | 11.97209250674465 | 18.06267714116722 | 24.17246988398857 |
| Ag | 14.00042798123836 | 20.06086046164828 | 24.10096637223153 |
| Ag | 16.02219396489613 | 18.05040945488578 | 24.12719161838870 |

**Pd<sub>110</sub>Ag<sub>295</sub>LEH-1323.547**

|    |                   |                   |                  |
|----|-------------------|-------------------|------------------|
| Pd | 11.94637215581843 | 11.92655140733219 | 5.85684161116230 |
| Pd | 13.99577328609807 | 9.89479023589967  | 5.84773144671881 |
| Pd | 16.04690629035419 | 11.92706367446256 | 5.85410383979420 |
| Pd | 9.90275571112334  | 13.99175420912828 | 5.84201126706256 |
| Pd | 11.94470797901919 | 16.05901538393190 | 5.84439044604126 |
| Pd | 13.99211396998741 | 13.99405229185032 | 5.87743380128022 |
| Pd | 16.04961198721880 | 16.06321625728611 | 5.84524916428190 |
| Pd | 18.10254591758267 | 13.99468970154981 | 5.83636415518501 |
| Pd | 14.00043933146570 | 18.11752222699608 | 5.82822320369158 |
| Pd | 11.94495781967501 | 7.87842439710777  | 9.90163707565420 |
| Pd | 13.98919131612735 | 5.85670315843682  | 9.89334014289189 |
| Pd | 9.92458401785558  | 9.90681235849521  | 9.90330757483565 |
| Pd | 11.92914564134016 | 9.91605003385880  | 7.89856170582971 |
| Pd | 11.95966563265190 | 11.94878017418651 | 9.92314621197701 |
| Pd | 16.06722301886171 | 9.91260288709816  | 7.85788414104198 |
| Pd | 18.09695325990448 | 9.90999012306076  | 9.91004081334483 |
| Pd | 5.83890812788822  | 13.99476238120602 | 9.90519974776026 |

Pd 7.87868888283567 13.98997264580547 7.88391060677534  
Pd 9.91935783124934 13.99921573367691 9.90797323901211  
Pd 11.94902424998114 16.06157661012558 9.90799981372941  
Pd 18.09052166166723 13.99716188696423 9.90702393784872  
Pd 20.12879926460690 13.98760446798985 7.86627743719309  
Pd 22.15583283795856 13.99448977534456 9.89810916717035  
Pd 9.89320781459019 18.11089733376549 9.88848083819965  
Pd 14.00173750958726 18.09331933141177 9.90214605384531  
Pd 14.00198084641362 20.13323337820126 7.86540553155997  
Pd 18.10514576959701 18.10893271175429 9.89962927162587  
Pd 14.00545711015406 22.16105200773148 9.89648795533931  
Pd 9.89858713159355 5.84893883387999 13.99429166054247  
Pd 11.94438630821246 5.86355560421637 11.93120318007402  
Pd 13.99769229785512 5.88232653933841 13.99968431590767  
Pd 16.06016416575382 5.85586756271159 11.93843665108583  
Pd 18.09587744624454 5.85463712697027 13.99787475752371  
Pd 20.12951177978713 7.90861049346895 13.99742558705069  
Pd 5.84978403311402 9.89654311097836 14.00283109811680  
Pd 5.85552976850408 11.91999290593950 11.94564846772227  
Pd 7.87340139221669 9.90600934553491 11.93086590754440  
Pd 9.89566871565444 9.91220042939703 14.00020722109089  
Pd 14.01123792032093 9.90424324714174 13.98312897917947  
Pd 14.01537959784180 11.95470385160890 11.96836447270814  
Pd 16.02405300204874 9.92538175982787 11.97544257840909  
Pd 18.09948709884073 9.91503143699176 13.99713983112547  
Pd 20.12947882753661 9.91061528280573 11.96259512645685  
Pd 22.14870935461349 9.91067432330014 13.99639980098354  
Pd 22.14547978707010 11.92540828737626 11.95203747533609  
Pd 5.87968812215824 13.99670358733577 14.00718926929282  
Pd 5.85270760714415 16.06253352571451 11.94939170758348  
Pd 9.90005569269013 13.99936281047997 14.00781465115114  
Pd 14.00908745269938 14.00155736216331 13.98733091479450  
Pd 16.04646803884803 13.98825572380618 11.96965675693403  
Pd 18.08574964916792 14.00175441424077 14.01248910835364  
Pd 22.12719089356782 13.99425426238460 14.01291307221662  
Pd 22.15367068901875 16.05511020836791 11.94555790176234  
Pd 5.84575513279153 18.11016381710098 14.00034907176439  
Pd 7.89294602211603 20.13830542543778 14.01075720348981  
Pd 9.90362392363155 18.10605739362389 14.01556625896431  
Pd 14.00424167653171 18.09255994993467 14.00763655258934  
Pd 16.04372350807191 18.09520052640019 11.96216236563540  
Pd 18.08972330660602 18.09103360371468 14.00425319281951  
Pd 20.12556233812850 20.12118493968286 14.01040992415550  
Pd 22.16185631562967 18.09667536361157 14.00465886422715  
Pd 9.89473994803972 22.15279596444472 14.00897667557089  
Pd 11.94560534602519 22.15175076674183 11.94482005454472  
Pd 13.99399814868031 22.12623555395604 14.00006362627880  
Pd 16.05764843251163 22.16026321995396 11.94246289839883  
Pd 18.10498529971423 22.15657452531556 14.00772122065193  
Pd 11.94631995922357 5.85876067955427 16.08337522345294  
Pd 11.92428717035355 7.87186296473087 18.10080192562166  
Pd 13.98837662913606 5.84357294156453 18.09913990049720  
Pd 16.04894786652922 5.85677780795852 16.06840279934757  
Pd 16.05951989416887 7.85053846414803 18.09534934796959  
Pd 5.86738305064678 11.92644539546495 16.05111165487653  
Pd 7.87315965241226 9.90542105243498 16.07337061679710  
Pd 9.89823469943094 9.90191387211019 18.10524828637553  
Pd 13.99961428239406 9.88623850715379 18.09136569087364  
Pd 16.02866796774162 11.95919527668700 18.08916532728265  
Pd 18.10037465188010 9.89712650076177 18.09763107787406  
Pd 20.14780714022142 11.93615359162636 18.09227315414933  
Pd 22.15054380910026 11.94680209778846 16.07491194504181

Pd 5.84906816269734 13.99847420575756 18.09808064572815  
Pd 5.84601028182815 16.06208714045025 16.06004523324530  
Pd 9.90305727709619 13.99891908270752 18.10107939263408  
Pd 9.90548142265235 16.03119303245951 16.04591611534850  
Pd 14.00690820133924 14.01249834249988 18.09332243867341  
Pd 14.00849967014310 16.05314284468823 16.06381894132238  
Pd 16.01797122493333 16.04743787847121 18.06901059806922  
Pd 18.09776667784726 14.00486932236974 18.07726788401434  
Pd 20.14848920456075 16.07191212919359 18.09049612097513  
Pd 22.16170135493608 14.00181402538405 18.09955433592184  
Pd 22.15466344900370 16.05288359470254 16.07545690724143  
Pd 9.89951157931036 18.10032845490529 18.08741878590198  
Pd 9.89880735539536 20.12929825140414 16.04430700603760  
Pd 13.99252250608815 18.10353935846684 18.09239231933920  
Pd 16.03609489555275 20.12781919077707 18.09915360893878  
Pd 18.09990362998254 18.10790792528945 18.09151672542584  
Pd 11.92173625944971 22.14327418043369 16.05722210800124  
Pd 13.99887016964234 22.14524380486040 18.09385250454990  
Pd 16.05027961925392 22.13710990745354 16.07175460276817  
Pd 9.89820937508016 11.95246912217764 20.12299463778750  
Pd 11.92921004680415 11.95893760896972 22.13875836996503  
Pd 13.99902540434783 9.89244115727598 22.15061752818089  
Pd 16.06155936575632 11.94012054914172 22.13696843433391  
Pd 7.90414981877555 13.99499614785229 20.13471650039186  
Pd 9.90258347442829 13.99200863538219 22.15903205826465  
Pd 14.01328008005902 13.99459164873824 22.12399250046326  
Pd 16.04616263926527 16.05599704664523 22.14003120659730  
Pd 18.09856355492308 14.00162492150333 22.14142723093774  
Pd 11.94852002890538 18.10966508776613 20.09658317698244  
Pd 13.99585277316796 18.09983864662424 22.14384845814938  
Pd 13.99296556600223 20.10761871025790 20.09361396048673  
Ag 11.93708000005253 7.87163111824311 5.84070823528718  
Ag 13.99455376262442 5.82362861288842 5.82301639887206  
Ag 13.99337067809601 7.89126555379218 3.87970758765989  
Ag 16.05661023889282 7.85584588363914 5.83589024966501  
Ag 7.86717402965542 11.93325726805321 5.83688688928394  
Ag 9.89863716993277 9.88906883970970 5.83158711087141  
Ag 9.94996659588264 11.97043634529046 3.86813739636394  
Ag 11.98430422103680 9.93071972308228 3.84631026526330  
Ag 13.99587707877605 11.96682212397834 3.89821782534174  
Ag 16.00973785535027 9.92864035155356 3.85292814334961  
Ag 18.10323662762475 9.88542294006538 5.81421478402699  
Ag 18.04302484479651 11.97103158838773 3.86256338671032  
Ag 20.14413202886708 11.93383308828364 5.82456512516444  
Ag 5.87974838626496 13.99669908467416 5.86495713722502  
Ag 7.93429274783223 13.99569454593348 3.85555977049153  
Ag 7.86550465666043 16.05437266408263 5.84055975933896  
Ag 9.94384621142766 16.02435020223299 3.86616652708596  
Ag 11.97071043585334 13.99382482540543 3.89133570481316  
Ag 13.99638446163351 16.03118039165846 3.89620869872369  
Ag 16.02068362667425 13.99532167493479 3.89771427725457  
Ag 18.04932588136793 16.02576419729054 3.86228323955199  
Ag 20.06965554941465 13.99385040642229 3.85869992073088  
Ag 20.14540611482279 16.05428093591446 5.82757790438882  
Ag 22.14084393081951 13.99504034265155 5.86202284739407  
Ag 9.88226808056696 18.11938210609516 5.80687904116532  
Ag 11.97352253293660 18.06459852343577 3.85263949727951  
Ag 11.94239641835804 20.14661913141989 5.82777064462636  
Ag 13.99724772230836 20.09160534146363 3.84490415037725  
Ag 16.02176793282869 18.06338585233855 3.84664269520625  
Ag 16.06347572202551 20.15373534841479 5.81293354776580  
Ag 18.11577081324250 18.12118099204815 5.80034373774497

Ag 13.99979794165559 22.14351007779664 5.85128201371328  
 Ag 11.98330785863170 3.85817228100273 9.93930243493610  
 Ag 13.99356525046105 3.87338105185018 7.89888899803234  
 Ag 16.00877265998945 3.87311802106299 9.93685815372765  
 Ag 7.86057553299727 7.87789757443221 9.89966101209149  
 Ag 9.89614768573065 5.83430351762845 9.88978416657043  
 Ag 9.91990696565421 7.88877535065727 7.89029472803811  
 Ag 11.94069319826856 5.83554065753370 7.85988127070064  
 Ag 13.98961665543276 7.91212171185268 7.88830083517904  
 Ag 16.06069875008343 5.82500125263573 7.84756198163047  
 Ag 16.05796537317597 7.90745630290007 9.92424141181045  
 Ag 18.12039807897287 5.82027753729703 9.88073966798137  
 Ag 18.09755324029148 7.87525311134645 7.86516512797524  
 Ag 20.12982835765234 7.87933986510560 9.89785801384859  
 Ag 3.86237125037302 11.97022212132716 9.94863720482525  
 Ag 5.81759125988804 9.88495412294696 9.89176455640269  
 Ag 5.83296880168926 11.93628783223544 7.85848724155225  
 Ag 7.84896820291581 9.87714125395045 7.84505885885214  
 Ag 7.87657270036541 11.95747444454438 9.91413650354500  
 Ag 9.93093654738870 11.95477746360484 7.90027388956611  
 Ag 13.99199307264064 9.93574852736558 9.91543231226085  
 Ag 13.98938760086815 11.91964348085186 7.84617378314008  
 Ag 16.05380197909756 11.94394182727511 9.93883960867692  
 Ag 18.08435287589655 11.95798248976362 7.87760641210427  
 Ag 20.15191353804163 9.87862203126159 7.84600133232216  
 Ag 20.12143921409887 11.95749444882505 9.91978517857181  
 Ag 22.17187171074393 9.88863672976941 9.89705320647933  
 Ag 22.17112438224919 11.93776505223899 7.85611518899896  
 Ag 24.13675964701530 11.96938666449911 9.94491757651411  
 Ag 3.86420970416177 13.99201465609830 7.93630936097161  
 Ag 3.86467500143093 16.02849135575736 9.95065013857631  
 Ag 5.83359270223148 16.05399288088636 7.85925899295375  
 Ag 7.86966984284571 16.02680492933258 9.90576892194542  
 Ag 9.91499602202978 16.03393486365255 7.88778631050431  
 Ag 11.95198951385899 13.99864741030826 7.87364360859117  
 Ag 13.99474491717073 13.98036732739169 9.92892300281087  
 Ag 13.98828696792115 16.05443658558820 7.85963280223436  
 Ag 16.04496523712037 13.99672192349528 7.84281628187997  
 Ag 16.05668258928286 16.05188245271793 9.93478486289492  
 Ag 18.09656553127459 16.02827456651585 7.87041715072257  
 Ag 20.11966544976263 16.02449163201085 9.90705261320376  
 Ag 22.16520137355185 16.05136252294205 7.85755887064036  
 Ag 24.14062872120389 13.99435425783885 7.93168385559064  
 Ag 24.14025004328110 16.02442341073247 9.94471100091711  
 Ag 5.80615258010409 18.11784387820531 9.88671789930259  
 Ag 7.84818943050878 18.12335997176069 7.84520370154001  
 Ag 7.84784538960606 20.15529708147523 9.87828780704504  
 Ag 9.87825075183496 20.15842629092419 7.84237547164220  
 Ag 11.96458862304935 18.09231168054431 7.88184980906099  
 Ag 11.97501434912792 20.13535433587184 9.89956500423549  
 Ag 16.03032173269919 18.09822167579343 7.86659795776875  
 Ag 16.03475786020011 20.11110384093566 9.91622966740263  
 Ag 18.12070437063042 20.15616510894802 7.84390212438337  
 Ag 20.14795507040326 18.12087359424898 7.84926669348280  
 Ag 20.14809370557061 20.15572714400151 9.88087406455964  
 Ag 22.18696901557542 18.11317492115058 9.88675175324303  
 Ag 9.88128916769792 22.20005490745557 9.88086030468776  
 Ag 11.94496069310634 22.18190451599810 7.85094959053899  
 Ag 11.97960839745680 24.14045598468286 9.94249074912371  
 Ag 14.00108810699122 24.15195526486073 7.92434569155646  
 Ag 16.05415650096028 22.16388371919965 7.85883570720417  
 Ag 16.02460070973671 24.14640829005241 9.93949363647772

Ag 18.11571696876283 22.19334340385178 9.88249794862636  
 Ag 7.91976961373716 3.87074801273162 14.00393619041292  
 Ag 9.94778072462495 3.87127598649296 11.97033192080101  
 Ag 11.97490737448461 3.90962714708383 13.99998859158835  
 Ag 13.99867232715249 3.90512614772299 11.97291662881522  
 Ag 16.02528732766999 3.90181022752602 14.00379975397146  
 Ag 18.04940469510424 3.87163940505211 11.97487736716364  
 Ag 20.06500569370324 3.86303131898492 13.99920649405524  
 Ag 3.87359214269220 7.89814373918959 13.99916530628893  
 Ag 5.83563714121235 5.83954858199037 14.00169911140195  
 Ag 5.83215923194583 7.85851990988404 11.93645066011407  
 Ag 7.84438649253219 5.81246842501972 11.92596503403421  
 Ag 7.88170388101268 7.91830173591760 13.99994310449994  
 Ag 9.92136030853811 7.89520211479489 11.94548702878587  
 Ag 11.95664096786858 7.85764548453432 14.00361703268409  
 Ag 13.99715756430363 7.85510311282575 11.94428999479759  
 Ag 16.03834658789103 7.87359210470735 13.99303604074760  
 Ag 18.08846837567263 7.92194424097756 11.97306997055050  
 Ag 20.12505519566624 5.84943355242150 11.94531773048927  
 Ag 22.12161330033229 5.87658504872865 13.99421424849698  
 Ag 22.13839126691968 7.88586664145581 11.95139850158058  
 Ag 24.13175573767199 7.92992391771770 13.99830008619622  
 Ag 3.85478612214778 9.93341716625670 11.99113339109846  
 Ag 3.90208731132315 11.97163082796514 14.00481463429768  
 Ag 7.85612340988052 11.91427016091245 13.99690948217656  
 Ag 9.90951221281036 11.94400246956871 11.94996585636890  
 Ag 11.96869306403955 9.92641068845432 11.95721208297220  
 Ag 11.97994161615449 11.96193508892537 13.99809512526517  
 Ag 16.02932324382129 11.96358317484329 13.98552940924107  
 Ag 18.08215057717168 11.94745166842901 11.97285999003817  
 Ag 20.13941461560002 11.94958748584858 14.00264600793089  
 Ag 24.14871080424267 9.94034389692876 11.97690764878323  
 Ag 24.10741614376961 11.96888764218906 14.00745614509584  
 Ag 3.90624261288898 13.99424899383479 11.97848361765580  
 Ag 3.90191119808713 16.03215672171952 14.00042116805742  
 Ag 7.85492298156292 13.99690252422585 11.96196686011055  
 Ag 7.87215360213469 16.04710045768389 14.01204523377014  
 Ag 9.92629761007230 16.04486499011084 11.94300449235768  
 Ag 11.95377512717993 13.99091373808779 11.95220633360813  
 Ag 11.96121937139215 16.03654134688868 14.02560985666062  
 Ag 14.00864106500904 16.06144876343443 11.95421230083027  
 Ag 16.02306276208813 16.04357092453623 14.00353777879681  
 Ag 18.06235605542871 16.03898583559957 11.97111178805735  
 Ag 20.14624629219412 13.99974167795181 11.96492382469188  
 Ag 20.14210839230034 16.03538085946957 14.01523824973714  
 Ag 24.09175594362305 13.99109435541046 11.97240038900815  
 Ag 24.10617795656861 16.02562090782198 14.00512325319983  
 Ag 3.85462980738629 18.06180489300638 11.98018105386248  
 Ag 3.85205167677952 20.07839403711187 14.00971753740824  
 Ag 5.83605940662477 20.14630653664253 11.95147998371876  
 Ag 7.88180877828649 18.09866860635953 11.97260561138437  
 Ag 9.90579433675538 20.13413079476511 11.96476916991284  
 Ag 11.95158998120437 18.08123247623137 11.95280836976844  
 Ag 11.94248838881890 20.14166020889989 14.01544857856474  
 Ag 14.00786024080455 20.12899491330831 11.95982612725000  
 Ag 16.04206427907521 20.13210834601499 13.99411929533142  
 Ag 18.08340351140079 20.11121232505474 11.96964618435650  
 Ag 20.12783309665227 18.08911210244789 11.97817724016965  
 Ag 22.16563075138667 20.14250119611270 11.94542477759877  
 Ag 24.13713851488953 18.05537760215189 11.97344727125734  
 Ag 24.14006843770868 20.06817969679638 14.01008451612521  
 Ag 5.86599751242176 22.13565418091871 14.00895391656319

Ag 7.85100855801876 22.17390618711692 11.94536014119268  
 Ag 7.91765260761584 24.14087411893003 14.01088576810048  
 Ag 9.93738573063282 24.13531193667862 11.98274113854732  
 Ag 11.96464756466852 24.10437380367938 14.00406503943148  
 Ag 14.00023892662419 24.10922414072781 11.97016016193531  
 Ag 16.03032505136957 24.09068371753682 14.01324524524107  
 Ag 18.05735311843315 24.14346525768277 11.97847336834594  
 Ag 20.13466498601573 22.16379832831684 11.94596668951151  
 Ag 20.06727268859365 24.14966187791752 13.99926728789462  
 Ag 22.12618881575416 22.13533526569125 14.00383583397268  
 Ag 9.94806425888269 3.87890442468986 16.02267096968696  
 Ag 11.98295942801174 3.84157409842557 18.06687383235852  
 Ag 13.99535370869783 3.89891886861390 16.02391528756884  
 Ag 16.00888048980190 3.85481053925272 18.05827120675595  
 Ag 18.05274553470039 3.87481300259394 16.02427863410924  
 Ag 5.83105821816611 7.86117512164075 16.06481956292665  
 Ag 7.83640970616667 5.80649069989160 16.07356261734106  
 Ag 7.85471949067291 7.86586906474840 18.10516673080916  
 Ag 9.88777052306354 5.81722171523214 18.11792037066516  
 Ag 9.90783056864493 7.88566488330304 16.05332705551358  
 Ag 14.00029064218139 7.85623495740556 16.08250584772783  
 Ag 18.10352981919420 5.82048247598500 18.10810043105528  
 Ag 18.08435254705233 7.88576367302568 16.03818854710166  
 Ag 20.13660577935453 5.84661825302013 16.04773536629979  
 Ag 20.15260645820182 7.85126635977690 18.12012642322453  
 Ag 22.16569532479104 7.86536522437918 16.05510301249158  
 Ag 3.85534709078217 9.93614269464050 16.01645232235119  
 Ag 3.87494929457312 11.97435583769199 18.04780513667225  
 Ag 5.82732095655494 9.89084567911933 18.10541377076614  
 Ag 7.89179644753750 11.96457607771329 18.09986542885825  
 Ag 9.90579642550575 11.94103226318354 16.03241851677398  
 Ag 11.96716061208508 9.89625023150117 16.05686567578442  
 Ag 11.93863694375955 11.96160915031201 18.09549696845881  
 Ag 14.00877663614880 11.95626405482509 16.06510526055664  
 Ag 16.03837904375808 9.91211610679381 16.07616960970804  
 Ag 18.07916426591065 11.96388121041998 16.07628246726562  
 Ag 20.12193225582051 9.92143070957988 16.04795691714721  
 Ag 22.18937340395401 9.89239404197674 18.11388771597392  
 Ag 24.13446894114028 9.94240760649090 16.02322349314474  
 Ag 24.15358433860926 11.98798096325339 18.06805511457397  
 Ag 3.90251163490729 13.99422731325381 16.02927790812762  
 Ag 3.86088618487384 16.02530954847921 18.05988753763815  
 Ag 7.86787977394510 14.00622875651528 16.04203688753283  
 Ag 7.89462720292133 16.03737642401390 18.07747943805326  
 Ag 11.96331481213573 14.02249327473945 16.04945742549135  
 Ag 11.95163367828566 16.05963941263698 18.07340943679592  
 Ag 16.02319568863450 14.01488785846648 16.06933951239621  
 Ag 18.08778047019021 16.04176783439781 16.07868914063262  
 Ag 20.14668201697323 13.99844097620523 16.08936951354945  
 Ag 24.11238111302850 13.99968600102016 16.03334743439028  
 Ag 24.15722303984702 16.01286447965899 18.07184314173502  
 Ag 3.86022414927162 18.06021487817400 16.02650275511334  
 Ag 5.81113710211669 18.11812395822916 18.12054396764009  
 Ag 5.83659898816804 20.13500014272677 16.05648751955032  
 Ag 7.90359883770763 18.09349522065616 16.03691610100381  
 Ag 7.87093517970433 20.13673947217680 18.10662083523053  
 Ag 11.94595046580747 18.07532828144913 16.03659620948938  
 Ag 11.94462668638733 20.11263560571313 18.07785913455800  
 Ag 14.00614145052849 20.14567298361070 16.05784454694097  
 Ag 16.02065211155463 18.07722394522438 16.07819380502238  
 Ag 18.07708987970053 20.11812983543066 16.04388960240353  
 Ag 20.12573769487708 18.08651581089521 16.04293904575097

Ag 20.16112277357947 20.15297939490391 18.12185674306491  
 Ag 22.19112371418988 18.11117600546435 18.11645867721584  
 Ag 22.17426934137369 20.14230716782432 16.06280998148919  
 Ag 24.14163087528251 18.05135157001717 16.02820444181793  
 Ag 7.87876596311249 22.14781557132834 16.05586811525315  
 Ag 9.88404411539510 22.17494624956236 18.10764379209988  
 Ag 9.93914912542022 24.15136149853075 16.02410767847335  
 Ag 11.97057975919565 24.13110987651394 18.06441013788765  
 Ag 13.98946075312516 24.09191139045091 16.03244960794055  
 Ag 16.02090465764467 24.14202333596321 18.05346689659620  
 Ag 18.09930198646848 22.16955217320585 18.10724864095398  
 Ag 18.05579224400342 24.13684083314406 16.03165635818604  
 Ag 20.14123807615341 22.17138046410153 16.06279987907600  
 Ag 13.99699264860929 3.86833218098325 20.09986494761198  
 Ag 9.89616158194921 7.84889505579460 20.13600673674253  
 Ag 11.93176234409840 5.82059958257366 20.14194454115402  
 Ag 11.92623515548943 7.83217568489028 22.19489637860878  
 Ag 13.99807964825408 5.83053795611678 22.16030416281913  
 Ag 13.99095921924184 7.86857208227105 20.08002027277251  
 Ag 16.06148526465040 5.82425178119359 20.14079292551482  
 Ag 16.06475695835122 7.84570046348282 22.17747296480950  
 Ag 18.10068776745254 7.85658028381831 20.12864231053068  
 Ag 5.83263119730652 11.94300209035815 20.14061133803794  
 Ag 7.87447727418342 9.89259681665905 20.14570661124333  
 Ag 7.88170154445095 11.94985053431910 22.14284846497233  
 Ag 9.88931820680448 9.89324811696316 22.17680291397408  
 Ag 11.94628837400166 9.91505529147341 20.11852595009427  
 Ag 14.01504190333984 11.94774548328748 20.12375728686749  
 Ag 16.04516172606384 9.90772585059113 20.08588613572644  
 Ag 18.11608127930186 9.88383886026174 22.16679220551624  
 Ag 18.08715023354764 11.95890330099838 20.07743881657663  
 Ag 20.13919343522586 9.90057060150291 20.12770079421461  
 Ag 20.15536183573399 11.93235479256291 22.17238515381721  
 Ag 22.17486741140399 11.93675390536716 20.13867773550273  
 Ag 3.86218075646363 14.00166520406828 20.06788107697951  
 Ag 5.87686542639294 13.99436038063232 22.12971474547181  
 Ag 5.85752061083192 16.04606356204823 20.13220576848339  
 Ag 7.87110719933591 16.05750996353382 22.16739149951340  
 Ag 9.91254550353663 16.05386297470496 20.11033697266870  
 Ag 11.94400424732602 13.97822164809544 20.12451108163530  
 Ag 11.96963974208458 16.05756550519685 22.12814003408316  
 Ag 14.00638409646189 16.05877670230611 20.10749092265450  
 Ag 16.04688149473681 14.00512420802306 20.10204272397790  
 Ag 18.07692903470586 16.04888691080675 20.07424359105123  
 Ag 20.12328232468328 14.00429866651485 20.06643151431774  
 Ag 20.15232638770627 16.07056954538007 22.16894689047339  
 Ag 22.16402905591791 13.99826673234282 22.15983988023265  
 Ag 22.17754330254566 16.06470252560246 20.14155995860833  
 Ag 24.13242190445122 14.00271880711052 20.10262193094152  
 Ag 7.84279401936324 18.12433564843190 20.14966335162740  
 Ag 9.88948768421756 18.11850908003366 22.19350470500538  
 Ag 9.89191448549989 20.11861608756680 20.13765830359269  
 Ag 11.96156511419670 20.10066607369280 22.12770225276735  
 Ag 16.03286281339784 18.08919955860193 20.07589831831877  
 Ag 16.04909250498508 20.12699365354947 22.13965710143128  
 Ag 18.11554694185378 18.11165142332718 22.16433705917670  
 Ag 18.10549373770539 20.13248600666901 20.12021584106908  
 Ag 20.14215537852115 18.09955281225476 20.12538212793065  
 Ag 11.94572029629100 22.15925424059288 20.13241494627228  
 Ag 13.99832430200395 22.11726060515254 22.12084054005577  
 Ag 13.99781325659987 24.12877854992362 20.06796027658335  
 Ag 16.04041821213149 22.13130003142466 20.11370896112276

|    |                   |                   |                   |
|----|-------------------|-------------------|-------------------|
| Ag | 13.99948687599133 | 7.90717435786471  | 24.13337879644826 |
| Ag | 9.94245240932100  | 11.97367176771691 | 24.14978261189279 |
| Ag | 11.98035434959521 | 9.94267621247205  | 24.12217558841262 |
| Ag | 14.00079500157165 | 11.96948000375579 | 24.09228523216965 |
| Ag | 16.02548009382799 | 9.93867621396254  | 24.12716676669613 |
| Ag | 18.06016507213186 | 11.97687704992794 | 24.11949320873307 |
| Ag | 7.92528967901761  | 13.99219948234077 | 24.13873163369809 |
| Ag | 9.93688546874501  | 16.02451609788225 | 24.16388233362343 |
| Ag | 11.97890132438768 | 13.99187820817315 | 24.12820816727600 |
| Ag | 14.01791921134994 | 16.02969575586626 | 24.13869986053536 |
| Ag | 16.03092611988325 | 13.99676608641196 | 24.10256631016579 |
| Ag | 18.05873617110218 | 16.02119478913137 | 24.11523835137242 |
| Ag | 20.09070964128888 | 13.99855410465053 | 24.11838828788409 |
| Ag | 11.97469215678801 | 18.06918351591799 | 24.17345627434794 |
| Ag | 14.00096408160365 | 20.07263304044284 | 24.13053213431035 |
| Ag | 16.02542300449901 | 18.06208201397630 | 24.12152683666359 |

**Pd<sub>40</sub>Au<sub>161</sub>L<sub>10</sub>-680.860**

|    |                   |                   |                   |
|----|-------------------|-------------------|-------------------|
| Pd | 14.55511979613052 | 12.50006330168741 | 14.46592208297522 |
| Pd | 16.61351089603435 | 14.57976699225715 | 10.49405670303931 |
| Pd | 18.62256393402465 | 12.50003014879399 | 10.51401274108662 |
| Pd | 8.38652025440000  | 10.42024526194436 | 14.50648971640985 |
| Pd | 6.37753884580064  | 12.50007117872005 | 10.51407332792771 |
| Pd | 12.49999606651401 | 14.52018662895751 | 18.41769691349713 |
| Pd | 14.52016118887086 | 12.50006383856271 | 6.58203509625801  |
| Pd | 14.52014917647882 | 12.49999072182464 | 18.41800296937732 |
| Pd | 12.49999888455318 | 10.44483092467542 | 14.46551834270499 |
| Pd | 12.50000446441748 | 6.37733239332863  | 10.51380114965403 |
| Pd | 12.49999849627017 | 14.55505986376709 | 14.46644229657579 |
| Pd | 10.42024927882354 | 16.61350175446700 | 10.49386426871135 |
| Pd | 18.62246560047417 | 12.49998923922231 | 14.48602693985850 |
| Pd | 10.42024743915771 | 16.61355023190259 | 14.50620245779642 |
| Pd | 10.44490865175655 | 12.50007072478474 | 14.46611130342093 |
| Pd | 10.47983326999694 | 12.50004315977418 | 18.41784775485868 |
| Pd | 14.57978259265240 | 16.61353179841921 | 10.49375651098169 |
| Pd | 6.37753303769277  | 12.50004600268410 | 14.48592008586156 |
| Pd | 14.57979095506840 | 8.38672535886317  | 14.50628292988403 |
| Pd | 12.4999984175393  | 18.62235616519401 | 10.51426495423037 |
| Pd | 14.57979487308861 | 8.38667182371111  | 10.49368316941341 |
| Pd | 10.42022581028012 | 8.38667861551962  | 10.49377688879942 |
| Pd | 12.49999544154349 | 14.52007771119735 | 6.58223986431145  |
| Pd | 12.50002746414286 | 14.55501460553191 | 10.53362391409445 |
| Pd | 16.61347873961886 | 14.57974941025514 | 14.50597929195865 |
| Pd | 12.50001167694794 | 18.62239746933302 | 14.48574621275528 |
| Pd | 12.49998883009906 | 10.47976374397778 | 18.41822511456887 |
| Pd | 16.61340933419968 | 10.42021614324873 | 14.50647912870177 |
| Pd | 14.55517113192200 | 12.50006760625016 | 10.53405831962950 |
| Pd | 10.42021400731483 | 8.38670523053775  | 14.50619392377325 |
| Pd | 8.38649835041677  | 14.57975917359443 | 14.50599632560058 |
| Pd | 12.50001493727372 | 10.47969596332053 | 6.58187538760287  |
| Pd | 10.47986349852821 | 12.50003147282203 | 6.58209926207408  |
| Pd | 12.49999623345602 | 10.44479436923738 | 10.53445910966967 |
| Pd | 12.49998031186474 | 6.37746294854633  | 14.48617235177193 |
| Pd | 8.38650498162491  | 10.4202222444213  | 10.49348555705413 |
| Pd | 8.38649541849202  | 14.57975840181473 | 10.49409219044660 |
| Pd | 16.61344182574278 | 10.42021731750117 | 10.49345293986003 |
| Pd | 14.57979457737735 | 16.61357417411524 | 14.50631579053384 |
| Pd | 10.44490378013016 | 12.50003460013619 | 10.53394665320932 |
| Au | 14.50079764721880 | 14.50053128550850 | 4.54671500207933  |
| Au | 12.49992266317000 | 6.43647463562123  | 18.49010053638317 |
| Au | 8.36074749923154  | 10.35881273254260 | 18.55596242746975 |
| Au | 12.49998421070690 | 4.47236148415436  | 16.47452017446433 |



|    |                   |                   |                   |
|----|-------------------|-------------------|-------------------|
| Au | 20.52785378197107 | 12.50000148197444 | 16.47458844825617 |
| Au | 10.49926109714305 | 14.50067714641123 | 20.45326532664819 |
| Au | 10.36143772424192 | 18.65567202351427 | 16.56806837141552 |
| Au | 20.64047106193761 | 14.52968830660648 | 14.50178470099769 |
| Au | 20.64038998468192 | 10.47014569037578 | 14.50157720465684 |
| Au | 10.49924364371224 | 14.50054801408717 | 4.54670073729902  |
| Au | 10.35882129510885 | 8.36090778662707  | 18.55609913895089 |
| Au | 4.35943942078638  | 14.52982080555496 | 14.50176254496836 |
| Au | 14.63834503397930 | 6.34445808085334  | 16.56807121904841 |
| Au | 6.34441363671762  | 10.36141693689834 | 16.56809485500160 |
| Au | 12.49997523963874 | 6.43629537194166  | 6.50997286805315  |
| Au | 14.64120422576056 | 16.63923309058803 | 18.55608404062267 |
| Au | 14.52977573806636 | 4.35961247551275  | 10.49840297755317 |
| Au | 6.29903306406847  | 8.31460913258615  | 14.62092733538874 |
| Au | 14.63834813738955 | 6.34434202190816  | 8.43192058354529  |
| Au | 10.47020771564672 | 20.64052534015936 | 10.49828552998455 |
| Au | 8.31449751763117  | 6.29904405659411  | 10.37924528955670 |
| Au | 10.35878208516972 | 16.63914440081020 | 6.44392021042390  |
| Au | 18.70091235519975 | 8.31460879859486  | 14.62083804384726 |
| Au | 14.52986983508439 | 20.64056902205853 | 14.50164826575768 |
| Au | 6.34427359415310  | 14.63845886434732 | 8.43197132367373  |
| Au | 6.36944710336847  | 6.36948748800309  | 12.49994335163528 |
| Au | 8.31453030036464  | 18.70094849780376 | 14.62098249836020 |
| Au | 18.63047028413716 | 6.36945731130294  | 12.49993581255278 |
| Au | 6.43629926064812  | 12.49996916517931 | 6.50985434278734  |
| Au | 18.70091342271835 | 16.68544291228539 | 14.62096715535545 |
| Au | 16.65580423152709 | 8.34433366203494  | 16.56319505057772 |
| Au | 6.34435319754318  | 10.36136632291571 | 8.43185656882064  |
| Au | 6.29910000704693  | 16.68548111854135 | 10.37907332346892 |
| Au | 16.65587628094613 | 16.65601405756111 | 16.56318007718404 |
| Au | 14.63865176928177 | 18.65565152262325 | 16.56816063419956 |
| Au | 16.68548148423872 | 6.29895383019381  | 10.37913799650193 |
| Au | 12.50003169901453 | 4.23425749313563  | 12.50003517146111 |
| Au | 10.47016831359606 | 20.64062566834698 | 14.50168669599269 |
| Au | 14.52975384460216 | 4.35973152254155  | 14.50160910964888 |
| Au | 12.50005415049349 | 12.49986780136130 | 4.51608590475819  |
| Au | 8.31460032715250  | 18.70082560122358 | 10.37900766486582 |
| Au | 10.36166307276501 | 6.34435258018079  | 8.43202623887748  |
| Au | 12.50003087285939 | 20.76587524016331 | 12.49994142926043 |
| Au | 18.70101631241605 | 8.31453816518664  | 10.37899963463625 |
| Au | 10.35885657540021 | 8.36078888471307  | 6.44396523042955  |
| Au | 16.68538197193972 | 6.29910683743718  | 14.62073027939875 |
| Au | 14.50056542754519 | 10.49932458312761 | 4.54683204912964  |
| Au | 14.64121956460848 | 8.36075725864285  | 6.44395081883733  |
| Au | 18.63060119983398 | 18.63050340280126 | 12.50001751404130 |
| Au | 6.29904386468980  | 16.68551443843414 | 14.62097099889833 |
| Au | 16.68550204005771 | 18.70095679614690 | 14.62103345302127 |
| Au | 18.65575894025405 | 14.63839843246083 | 8.43197339446695  |
| Au | 10.49935689061035 | 10.49935425036062 | 20.45332927409736 |
| Au | 6.29895596176983  | 8.31459296999306  | 10.37905633842834 |
| Au | 8.34409845372980  | 8.34433721675570  | 16.56319806061103 |
| Au | 18.70094724119053 | 16.68546994581331 | 10.37908925512063 |
| Au | 18.56359529029999 | 12.49993410320454 | 18.49016830088858 |
| Au | 14.50065750412855 | 14.50061302971658 | 20.45333240892000 |
| Au | 8.36079053208461  | 10.35871191301350 | 6.44402606223453  |
| Au | 14.50060866495873 | 10.49928838000984 | 20.45339841979981 |
| Au | 4.35949189774901  | 14.52982893275315 | 10.49824328344557 |
| Au | 16.68543238946538 | 18.70087080005933 | 10.37898805624046 |
| Au | 4.35957359761660  | 10.47021108481248 | 10.49842931275029 |
| Au | 12.50004342688348 | 18.56372623292667 | 18.49020658476622 |
| Au | 16.63922916882271 | 10.35869392320813 | 6.44406405400638  |
| Au | 8.36077342367862  | 14.64117836301045 | 18.55609851137537 |

|    |                   |                   |                   |
|----|-------------------|-------------------|-------------------|
| Au | 10.35880816547725 | 16.63926701650895 | 18.55602847985460 |
| Au | 20.64047664615641 | 10.47018949122910 | 10.49841016819020 |
| Au | 4.23419142152575  | 12.50000587495860 | 12.49995721094437 |
| Au | 14.63858363728475 | 18.65558531780155 | 8.43189980261942  |
| Au | 16.63918173088061 | 14.64106598705512 | 6.44388203450921  |
| Au | 6.36939757476831  | 18.63056394490019 | 12.50003991819568 |
| Au | 6.43628135648447  | 12.49999901971334 | 18.49011739809326 |
| Au | 18.65549887810195 | 10.36147392145853 | 16.56808402934227 |
| Au | 8.31454986350449  | 6.29912280978074  | 14.62073172992174 |
| Au | 4.35949794152314  | 10.47022072944584 | 14.50153561336380 |
| Au | 8.34405304920855  | 8.34426867574073  | 8.43681428990631  |
| Au | 10.47022823477986 | 4.35958777360508  | 10.49845596465852 |
| Au | 20.76579789053444 | 12.49990308185130 | 12.50005251443256 |
| Au | 16.65584882278398 | 16.65597376313080 | 8.43684602353392  |
| Au | 20.64054878874122 | 14.52975690807028 | 10.49828124562559 |
| Au | 16.65585076577264 | 8.34426285561329  | 8.43672209315445  |
| Au | 18.56375170427815 | 12.49996383640224 | 6.50985578928270  |
| Au | 18.65563668954879 | 10.36141327428495 | 8.43182896166102  |
| Au | 10.47027415143397 | 4.35972514067146  | 14.50157757419693 |
| Au | 18.65570597292355 | 14.63837708792834 | 16.56811939562419 |
| Au | 6.34425282843468  | 14.63850089791660 | 16.56809942601344 |
| Au | 8.34414928563067  | 16.65590082153183 | 8.43689078976801  |
| Au | 16.63917571025637 | 10.35874746604233 | 18.55604944043526 |
| Au | 14.52981352963787 | 20.64050333240883 | 10.49833892779329 |
| Au | 8.36082980956501  | 14.64100193804504 | 6.44390324836468  |
| Au | 14.64116919201809 | 16.63912931377662 | 6.44392815439658  |
| Au | 14.64105369572802 | 8.36091136930906  | 18.55609083329781 |
| Au | 10.36162705738968 | 6.34441076361679  | 16.56802856485728 |
| Au | 12.49996654500394 | 12.49996646010259 | 20.48391576745930 |
| Au | 16.63915032139501 | 14.64112029292152 | 18.55619760602672 |
| Au | 10.49947466618586 | 10.49923763859652 | 4.54686701360752  |
| Au | 10.36144256187056 | 18.65557406078211 | 8.43194366684301  |
| Au | 8.34406113964416  | 16.65605481132884 | 16.56308958305547 |
| Au | 12.49994766486178 | 18.56354852944613 | 6.50971175274539  |
| Au | 16.47802325126027 | 12.50007823934173 | 20.38627236716092 |
| Au | 12.50004732991954 | 8.52195219517840  | 4.61391737567921  |
| Au | 16.47811221627592 | 12.49996393383053 | 4.61388750934979  |
| Au | 6.39676368893546  | 10.47064924202570 | 12.49997186001158 |
| Au | 12.49994272430666 | 16.57992977212057 | 12.50002384053653 |
| Au | 12.49988508144868 | 8.52208429602538  | 20.38627790482720 |
| Au | 20.58191269025728 | 16.57473870977357 | 12.50007278002692 |
| Au | 12.50000588563855 | 20.52796291854911 | 8.52530661852039  |
| Au | 18.60283716957855 | 14.52926008669062 | 12.49999734353802 |
| Au | 12.49992725548667 | 16.47828436482792 | 20.38628699131531 |
| Au | 12.49998343112477 | 4.47223120367846  | 8.52552588112998  |
| Au | 16.59327765925392 | 16.59307569033918 | 12.50001420299560 |
| Au | 10.44733206782537 | 14.55285277757763 | 16.43683553485268 |
| Au | 8.42707135130506  | 12.49985098113907 | 16.42201222011285 |
| Au | 16.57477312030386 | 20.58200679011115 | 12.49995882309226 |
| Au | 20.52790566732784 | 12.49998680605453 | 8.52543869987292  |
| Au | 4.47201230731406  | 12.50003519266306 | 16.47454304847336 |
| Au | 10.44067680644884 | 10.44000495955659 | 12.49997379762529 |
| Au | 8.42519969868658  | 20.58205481844941 | 12.49992484485866 |
| Au | 12.49993705429140 | 12.50043279446971 | 16.41568507642112 |
| Au | 10.47040026196312 | 6.39690029199760  | 12.49995720994287 |
| Au | 12.50009775993290 | 12.49959508728145 | 12.49997339832157 |
| Au | 14.56030473693782 | 14.55962257581250 | 12.50000527320825 |
| Au | 12.49993231497092 | 8.42144110911036  | 12.49993698626657 |
| Au | 4.41800760056498  | 16.57484531508234 | 12.49999445578285 |
| Au | 14.55936556029913 | 10.44015805303546 | 12.49997311057325 |
| Au | 14.55323101758147 | 10.44696552279401 | 8.56327903681376  |
| Au | 14.52963203376397 | 6.39680615032655  | 12.49994486656137 |

|    |                   |                   |                   |
|----|-------------------|-------------------|-------------------|
| Au | 12.49993316459275 | 12.50041335897517 | 8.58431397484888  |
| Au | 10.47085298457569 | 18.60288784342137 | 12.50001533771469 |
| Au | 12.50004112104098 | 8.42693947578613  | 16.42201984015862 |
| Au | 12.49997348789755 | 16.47807668295583 | 4.61366018011780  |
| Au | 12.50000082658925 | 20.52808789906503 | 16.47460254693707 |
| Au | 16.57926961327356 | 12.50039077706057 | 12.49996469852512 |
| Au | 8.52182924703654  | 12.50014185599106 | 20.38617435937064 |
| Au | 16.57304439015559 | 12.49983932977563 | 8.57796730111274  |
| Au | 12.50006315798821 | 16.57282861962546 | 16.42200329073153 |
| Au | 16.57294851288047 | 12.49983096501630 | 16.42205176284639 |
| Au | 10.43978454396358 | 14.55975412342024 | 12.50002319649627 |
| Au | 8.42709324193466  | 12.49983255223970 | 8.57798620004163  |
| Au | 10.44679142665780 | 10.44710081548173 | 16.43673445799667 |
| Au | 10.44737525128052 | 14.55278379921765 | 8.56319517775831  |
| Au | 6.39722597606435  | 14.52923474624875 | 12.50003149580965 |
| Au | 4.47203011945901  | 12.50001414402824 | 8.52544503258536  |
| Au | 12.50001918523532 | 16.57274571294952 | 8.57798676026387  |
| Au | 14.55268291130424 | 14.55296284651661 | 16.43683737030949 |
| Au | 16.57466881283738 | 4.41824073520015  | 12.49999119698766 |
| Au | 14.52920773280091 | 18.60296292576988 | 12.49999983490434 |
| Au | 14.55320475921388 | 10.44699028198673 | 16.43673553551272 |
| Au | 18.60329199356199 | 10.47053071036839 | 12.49993338557142 |
| Au | 16.59328392476140 | 8.40664480804767  | 12.49991795048425 |
| Au | 8.42526351579482  | 4.41826538437469  | 12.50005334395309 |
| Au | 10.44682910963425 | 10.44704153037066 | 8.56324407600093  |
| Au | 8.40683142097300  | 16.59305854075214 | 12.50002660254416 |
| Au | 8.40675727885148  | 8.40667693153040  | 12.49995823292968 |
| Au | 14.55265079080010 | 14.55290264388164 | 8.56318720107914  |
| Au | 20.58182269220851 | 8.42535164458673  | 12.49991541189719 |
| Au | 12.50006158738709 | 8.42684844539129  | 8.57798763227832  |
| Au | 8.52190765567799  | 12.49996138745336 | 4.61381044791581  |
| Au | 8.42049854170979  | 12.50039122471619 | 12.49999169591348 |
| Au | 4.41803892013221  | 8.42541375323740  | 12.50006097992012 |

**Pd<sub>40</sub>Au<sub>161</sub>LEH-681.346**

|    |                   |                   |                   |
|----|-------------------|-------------------|-------------------|
| Pd | 6.43565926801491  | 10.48592763275453 | 12.49991132656169 |
| Pd | 18.56649201045745 | 14.53065447588663 | 12.50003890231252 |
| Pd | 16.57444971598642 | 16.57075683807168 | 12.49995849663055 |
| Pd | 8.43044501087517  | 12.50022115023600 | 16.56966615878665 |
| Pd | 14.53657053112615 | 14.54018789335190 | 12.49999218024908 |
| Pd | 14.53651983506966 | 10.45982777612098 | 12.50011933956038 |
| Pd | 14.56939368827450 | 10.42585526616039 | 8.45729067910926  |
| Pd | 14.51805739587338 | 6.43712174580101  | 12.50039754362015 |
| Pd | 16.56519130982587 | 12.49970824268387 | 8.44879618067680  |
| Pd | 16.56494633145634 | 12.50020258520853 | 16.55142292696248 |
| Pd | 8.43054873460741  | 12.49991765841896 | 8.43018268080685  |
| Pd | 6.43562810078715  | 14.51419441000171 | 12.49968539688337 |
| Pd | 14.56928710695403 | 14.57405697258231 | 16.54290531660815 |
| Pd | 14.51818345503493 | 18.56285623846763 | 12.49981019274307 |
| Pd | 14.56933353325038 | 10.42622944747466 | 16.54302329956248 |
| Pd | 18.56650624977447 | 10.46920736783112 | 12.50017273140913 |
| Pd | 16.57441350019028 | 8.42915363440177  | 12.50026030489619 |
| Pd | 8.43357347446084  | 16.55287629065392 | 12.49963690265717 |
| Pd | 8.43362377482745  | 8.44722795123585  | 12.50007028003615 |
| Pd | 14.56944534607950 | 14.57375154182138 | 8.45709679545683  |
| Pd | 18.56342943379861 | 12.49984798326096 | 10.48427517878071 |
| Pd | 6.43531222644600  | 12.49999099354105 | 10.46778475494199 |
| Pd | 12.50663534109709 | 14.54135016004779 | 18.55545269696733 |
| Pd | 12.49062596274667 | 6.44584503006153  | 10.45521486778550 |
| Pd | 10.42938567634383 | 16.54478882936071 | 10.42620029534679 |
| Pd | 18.56324534376303 | 12.50003477072871 | 14.51602488002789 |
| Pd | 10.42931071433629 | 16.54486491870763 | 14.57342626873536 |

|    |                   |                   |                   |
|----|-------------------|-------------------|-------------------|
| Pd | 10.46401814171217 | 12.50016505250110 | 14.53942374344854 |
| Pd | 10.48313839726321 | 12.50021106242684 | 18.56132897656558 |
| Pd | 6.43522142741416  | 12.50014815874910 | 14.53184270631477 |
| Pd | 12.49081847518828 | 18.55398386525297 | 10.45460399164853 |
| Pd | 10.42936924495710 | 8.45513790679642  | 10.42653804016756 |
| Pd | 12.50688303370316 | 14.54094098727833 | 6.44461750956381  |
| Pd | 12.49058360515140 | 18.55413320290546 | 14.54494848753756 |
| Pd | 12.50665821871210 | 10.45909407589078 | 18.55534681745183 |
| Pd | 10.42926985524851 | 8.45539149934386  | 14.57371037512940 |
| Pd | 12.50683000942879 | 10.45862069930101 | 6.44470098390447  |
| Pd | 10.48323673378327 | 12.49979150376673 | 6.43864575840675  |
| Pd | 12.49061866627692 | 6.44601542609104  | 14.54542311432185 |
| Pd | 10.46407922948355 | 12.50000876912040 | 10.46053118437295 |
| Au | 14.49984639106011 | 14.50948541847627 | 4.41951558477679  |
| Au | 12.49933060879389 | 6.43421074412712  | 18.57261778649875 |
| Au | 8.35670135708760  | 10.36666875695958 | 18.63912735448579 |
| Au | 12.50684513767183 | 4.49868737902066  | 16.52274601382615 |
| Au | 20.49597777854575 | 12.50025264121270 | 16.50812382133658 |
| Au | 10.49295041236720 | 14.51025485427689 | 20.55459453024114 |
| Au | 10.36442975087229 | 18.63630970635155 | 16.63012073229881 |
| Au | 20.57488696636242 | 14.50486113959810 | 14.50195290642528 |
| Au | 20.57491380363879 | 10.49529105049527 | 14.50215867035171 |
| Au | 10.49310706646060 | 14.50985767237732 | 4.44532895309572  |
| Au | 10.33888491159782 | 8.33699289002368  | 18.66519261307235 |
| Au | 4.42558356111577  | 14.49939475400311 | 14.50763524217695 |
| Au | 14.66023634657452 | 6.33827331551365  | 16.66391244506911 |
| Au | 6.36079904142756  | 10.37822277876106 | 16.63001974026593 |
| Au | 12.49956967843671 | 6.43365329930406  | 6.42769522995678  |
| Au | 14.63286316587520 | 16.62748379192830 | 18.63565460879787 |
| Au | 14.50314864452655 | 4.44752551113233  | 10.48746735035827 |
| Au | 6.38623247630053  | 8.39459570403343  | 14.60365182548999 |
| Au | 14.66026780892958 | 6.33800278854446  | 8.33671903703621  |
| Au | 10.50103828314324 | 20.58096060330018 | 10.48568568781861 |
| Au | 8.39022615735504  | 6.38967979195498  | 10.39034203358203 |
| Au | 10.33902957448355 | 16.66326699503654 | 6.33459234012880  |
| Au | 18.64128574741081 | 8.36704462167324  | 14.61925846622790 |
| Au | 14.50330694836459 | 20.55241073709670 | 14.51276924551086 |
| Au | 6.36082658543502  | 14.62197193501421 | 8.36952827382492  |
| Au | 6.44856785152801  | 6.43387660358706  | 12.50000705510626 |
| Au | 8.39011980399579  | 18.61022368983983 | 14.60943157625421 |
| Au | 18.56455999007052 | 6.43816084926518  | 12.50049764070214 |
| Au | 6.44042528920259  | 12.49983968106150 | 6.44134002079677  |
| Au | 18.64126075986717 | 16.63306304475046 | 14.61893475855338 |
| Au | 16.67319777985932 | 8.31741769570097  | 16.66929879357891 |
| Au | 6.36101585864002  | 10.37781718055504 | 8.36966422418947  |
| Au | 6.38629627988071  | 16.60552255881568 | 10.39597753506690 |
| Au | 16.67309735068840 | 16.68288259243049 | 16.66895764758250 |
| Au | 14.66012835778475 | 18.66201958500704 | 16.66350567605254 |
| Au | 16.64574219164237 | 6.35872153598646  | 10.37070312853676 |
| Au | 12.51110108577411 | 4.36646462496886  | 12.50042737091301 |
| Au | 10.50087191162142 | 20.58112194374485 | 14.51368035169375 |
| Au | 14.50310354494637 | 4.44760205792882  | 14.51344165288791 |
| Au | 12.48823697393611 | 12.49982757294656 | 4.35906487209640  |
| Au | 8.39016178535897  | 18.61034044612678 | 10.38979476055517 |
| Au | 10.36459620474086 | 6.36362535538730  | 8.36984283929626  |
| Au | 12.51116916435593 | 20.63336468588646 | 12.49969660237466 |
| Au | 18.64145463011880 | 8.36685247363954  | 10.38131891991620 |
| Au | 10.33908484218725 | 8.33645634381996  | 6.33497298636247  |
| Au | 16.64568156387523 | 6.35878970254605  | 14.63009309773534 |
| Au | 14.49964905790014 | 10.48998670733833 | 4.41959548828206  |
| Au | 14.63312200584577 | 8.37247398825326  | 6.36443871303761  |
| Au | 18.56465574611600 | 18.56192968032283 | 12.49982241028215 |

Au 6.38632583673809 16.60562036638422 14.60329455902882  
 Au 16.64567055670070 18.64123131134935 14.62955054957935  
 Au 18.61477792709261 14.60747848374318 8.39728872769238  
 Au 10.49297723818441 10.49026930648457 20.55459314985604  
 Au 6.38640949054215 8.39444874018201 10.39635891238792  
 Au 8.32791367888056 8.32684385408196 16.67887867102470  
 Au 18.64146037057245 16.63288776736953 10.38101425763547  
 Au 18.55019257753892 12.50024669274154 18.56326078625080  
 Au 14.49936162021976 14.51009873491171 20.58058939815554  
 Au 8.35701611085867 10.36632246645039 6.36073241709748  
 Au 14.49951734522470 10.49050140144283 20.58061248342187  
 Au 4.42563849196312 14.49940308721269 10.49170248412378  
 Au 16.64588026628338 18.64110906714617 10.37004577518034  
 Au 4.42575322590677 10.50055963138768 10.49181389304475  
 Au 12.49928871238811 18.56637260361512 18.57235829746274  
 Au 16.60794295070167 10.38846265770825 6.39551228454428  
 Au 8.35677337008610 14.63370936846522 18.63898270707233  
 Au 10.33881254747987 16.66357057247232 18.66504534711642  
 Au 20.57505946720981 10.49508055776741 10.49828232397159  
 Au 4.37856892724622 12.50007346444443 12.49967191343802  
 Au 14.66056668863006 18.66166788556268 8.33608088050905  
 Au 16.60796286972174 14.61080871960609 6.39540216941829  
 Au 6.44860041503768 18.56621587329629 12.49957602126669  
 Au 6.44010563427867 12.50023389519289 18.55851964884924  
 Au 18.61451933637548 10.39247605292143 16.60303290739052  
 Au 8.39002977325203 6.38991849840707 14.60989497056246  
 Au 4.42562656610165 10.50086942949196 14.50774645661005  
 Au 8.32801206416696 8.32648632358515 8.32117289479229  
 Au 10.50099006653843 4.41887667231820 10.48630869883699  
 Au 20.62114769899529 12.49988714658268 12.50020135004197  
 Au 16.67345370121141 16.68258948137582 8.33089127045604  
 Au 20.57505521910964 14.50464330031467 10.49826568104259  
 Au 16.67323990680365 8.31709980069929 8.33127617726813  
 Au 18.55048323980465 12.49970538196265 6.43698895554957  
 Au 18.61480861403176 10.39205066749165 8.39737985613732  
 Au 10.50088470949419 4.41908844115133 14.51420742696970  
 Au 18.61454895007537 14.60791766080668 16.60286817186746  
 Au 6.36083141216267 14.62206681600169 16.62984143004275  
 Au 8.32800452666059 16.67332825117636 8.32084645451134  
 Au 16.60775719995132 10.38905172765817 18.60482409282565  
 Au 14.50339713092140 20.55234484980941 10.48665776209894  
 Au 8.35688143356992 14.63340944661418 6.36066990839215  
 Au 14.63332119587254 16.62693610030268 6.36424279041496  
 Au 14.63309605091094 8.37295186012768 18.63579236704119  
 Au 10.36434463759490 6.36405209067527 16.63048957323987  
 Au 12.48803704785280 12.50019374105971 20.64103499670292  
 Au 16.60766953724669 14.61147272073916 18.60477735031646  
 Au 10.49319147556974 10.48973358463791 4.44533349697801  
 Au 10.36457433014537 18.63606135870969 8.36926819964565  
 Au 8.32800268623577 16.67340064601469 16.67861239799143  
 Au 12.49969226491257 18.56583293123980 6.42720427590963  
 Au 16.50669101127603 12.50043818671871 20.51563590523063  
 Au 12.49281370644066 8.48575625377497 4.49281872524659  
 Au 16.50708293768725 12.49954778859354 4.48465303799467  
 Au 12.49919822309186 16.57941903772219 12.49988646788104  
 Au 12.49272951604422 8.48642537798691 20.50729195022637  
 Au 20.51650007803384 16.50065420421349 12.50006078899901  
 Au 12.50723457824646 20.50119545025701 8.47717912739307  
 Au 12.49257243758085 16.51434711453893 20.50732604909415  
 Au 12.50699137219838 4.49839804597358 8.47785755213710  
 Au 10.43324937089922 14.52395774437594 16.58029627561258  
 Au 16.49285998301278 20.49627727958882 12.49970373867575

|    |                   |                   |                   |
|----|-------------------|-------------------|-------------------|
| Au | 20.49615129927340 | 12.49988206922751 | 8.49224984553223  |
| Au | 4.48891563092445  | 12.50014886135317 | 16.50718173141637 |
| Au | 10.44512492665759 | 10.44700158397554 | 12.50006736351739 |
| Au | 8.49794615075092  | 20.52332020049352 | 12.49968561764820 |
| Au | 12.50053681555516 | 12.50019040116387 | 16.57564607639891 |
| Au | 10.48120610978858 | 6.48984651247293  | 12.50028330719232 |
| Au | 12.50075069308505 | 12.50007006058688 | 12.50000348906073 |
| Au | 12.49907661800106 | 8.42064016214381  | 12.50020742707589 |
| Au | 4.50155932851917  | 16.50272084988199 | 12.49966052333243 |
| Au | 12.50060631498978 | 12.49988084172469 | 8.42442895410855  |
| Au | 10.48124343025159 | 18.51021795449479 | 12.49969641898129 |
| Au | 12.49882420231510 | 8.44942561974064  | 16.55346563394138 |
| Au | 12.49300836756175 | 16.51354036914084 | 4.49253328322013  |
| Au | 12.50695468868728 | 20.50152422648968 | 16.52214559998127 |
| Au | 16.58496119265375 | 12.49995129084054 | 12.50009362468223 |
| Au | 8.50252419273196  | 12.50020009065956 | 20.49157035844164 |
| Au | 12.49881428303928 | 16.55094844411782 | 16.55331419531372 |
| Au | 10.44511985351298 | 14.55311153260645 | 12.49990389529315 |
| Au | 10.43307644045605 | 10.47646934902359 | 16.58032968860415 |
| Au | 10.43329160297282 | 14.52379074558324 | 8.41959309310496  |
| Au | 4.48908251576990  | 12.49987454287334 | 8.49251100459499  |
| Au | 12.49899388836523 | 16.55068343408786 | 8.44649019220721  |
| Au | 16.49270205145836 | 4.50379502961261  | 12.50043468093564 |
| Au | 8.49784001936731  | 4.47677615701295  | 12.50024982268740 |
| Au | 10.43327403156131 | 10.47603778022286 | 8.41975287403703  |
| Au | 20.51653794444657 | 8.49935368236096  | 12.50032133132946 |
| Au | 12.49895333372166 | 8.44905434854445  | 8.44683264017996  |
| Au | 8.50279573371780  | 12.49979599518650 | 4.50818676667229  |
| Au | 8.41541650886903  | 12.50005606163313 | 12.49994742547293 |
| Au | 4.50157181518050  | 8.49742451949469  | 12.49992751937026 |
| Au | 14.55612816623496 | 12.50009803911717 | 14.55158159706363 |
| Au | 16.57139369554490 | 14.55774818309713 | 10.47172122928210 |
| Au | 8.42917253660396  | 10.47238918537512 | 14.55640414532039 |
| Au | 14.51683868387537 | 12.49967924173801 | 6.49177604409468  |
| Au | 14.51660811542004 | 12.50031490279271 | 18.50841987262062 |
| Au | 12.50028249749519 | 10.46338710418841 | 14.53570508002440 |
| Au | 12.50029348983100 | 14.53681603063940 | 14.53554689616183 |
| Au | 14.56624607779212 | 16.58154359645210 | 10.47566190547124 |
| Au | 14.56603951582611 | 8.41850909391468  | 14.52451803379531 |
| Au | 14.56608299640476 | 8.41825198717658  | 10.47606246960623 |
| Au | 12.50036295323187 | 14.53665990696399 | 10.46430760707417 |
| Au | 16.57124756409506 | 14.55791325247630 | 14.52835385911198 |
| Au | 16.57123002395115 | 10.44215223126561 | 14.52848928590666 |
| Au | 14.55614143295734 | 12.49990663652734 | 10.44855089352045 |
| Au | 8.42930633892492  | 14.52785897597762 | 14.55620356046418 |
| Au | 12.50030230444700 | 10.46321064589373 | 10.46455012289458 |
| Au | 8.42928335881565  | 10.47210585143111 | 10.44356426313201 |
| Au | 8.42924502435713  | 14.52782414049365 | 10.44341341569864 |
| Au | 16.57135842070854 | 10.44196847894903 | 10.47188073180216 |
| Au | 14.56602516617777 | 16.58171232972043 | 14.52412053091101 |

**Pd<sub>43</sub>Au<sub>158</sub>L<sub>1</sub>-685.519**

|    |                   |                   |                   |
|----|-------------------|-------------------|-------------------|
| Pd | 8.44335533823601  | 12.49998568970323 | 16.55663698871194 |
| Pd | 12.49996126792181 | 14.52542964317260 | 14.52539998832978 |
| Pd | 10.49799876933513 | 18.55165407325025 | 12.50778041491094 |
| Pd | 12.49995754754998 | 10.47459039449776 | 10.47456261769699 |
| Pd | 12.49999209117660 | 8.44335441339907  | 8.44336630297440  |
| Pd | 14.50199087302789 | 6.44829221588483  | 12.49220919826589 |
| Pd | 14.52592962068056 | 10.47403528688662 | 16.53282753860713 |
| Pd | 18.55171669011866 | 12.50779290076028 | 14.50200596180425 |
| Pd | 8.46666048816778  | 12.49157086917137 | 8.46667868655712  |
| Pd | 10.47405886306592 | 16.53275439594149 | 10.47408033137260 |

Pd 12.49153705398079 8.46662333174698 16.53335672311696  
Pd 8.44337081217224 8.44336716269285 12.50000231486632  
Pd 14.52591073772876 8.46717487561992 14.52592960330730  
Pd 14.50198399045151 12.50779217868405 18.55170626777093  
Pd 10.49798809590583 12.49222284169387 6.44834373917364  
Pd 10.45549495779800 14.54447270597192 16.55265801427904  
Pd 12.50840810962739 16.53333789033348 8.46664436272918  
Pd 8.46721116037924 14.52591277531355 10.47407690754440  
Pd 8.44735235200002 10.45551491047697 14.54447340967045  
Pd 16.53279503203422 10.47407505174837 14.52590718831189  
Pd 12.49999048949900 16.55666062928259 16.55666417891826  
Pd 12.49218904987547 6.44833182962530 14.50197462949636  
Pd 14.52540638258844 12.49998542341408 10.47458663086648  
Pd 18.55171564934413 10.49797369486948 12.49220153357473  
Pd 14.54449010434474 16.55265827771014 14.54450617033047  
Pd 6.44833670853893 12.49222153486466 10.49801078603685  
Pd 10.47458700481020 10.47454045943304 12.50001009509194  
Pd 16.55666354724816 12.49998789388023 8.44331965016721  
Pd 6.44834028815891 14.50197222902932 12.50777914370323  
Pd 10.47456259794303 12.49998446685451 14.52542277914816  
Pd 14.52543686428227 14.52537962764297 12.50001045015692  
Pd 10.45549035193573 8.44737338950550 10.45551552030942  
Pd 16.53338510063797 12.50845040158716 16.53338425161868  
Pd 12.50776012291076 18.55168775784068 10.49798970336163  
Pd 8.46664515640345 16.53332171703249 12.50841628142315  
Pd 16.55263666044465 14.54451902255513 10.45546619032297  
Pd 12.50775605947876 14.50200175993333 6.44831307625360  
Pd 10.47407916031869 14.52588596320052 8.46725163039542  
Pd 12.49997977301169 12.49996649973029 12.49999165885140  
Pd 16.55668234031603 16.55668231574025 12.49999105944021  
Pd 12.49218772697647 10.49801491524577 18.55166777068124  
Pd 16.53336959054784 8.46660719547561 12.49153600446569  
Pd 14.54449334797424 10.45547602733864 8.44737572608056  
Au 20.49214551339303 8.50465403551676 12.49681890185231  
Au 16.52290802539934 12.48971662357500 4.46489026689815  
Au 10.46162731865678 4.36280568488254 10.46162526759497  
Au 10.42844866636933 10.47500411895227 16.54180810936237  
Au 12.49648419812390 12.50343446401661 16.53429762135999  
Au 18.66056657284489 16.66719340088870 14.63757833502621  
Au 10.43057798810679 18.56906375826108 8.43381142562077  
Au 14.52568270755446 12.50945858455385 14.52556189845294  
Au 10.47429148372842 14.52570183876500 12.50944803268622  
Au 18.60141257861486 14.60892553290943 16.59144966455052  
Au 10.46153174243302 6.45888052297505 12.48769461742651  
Au 10.47497226167870 16.54181770877588 14.57147666971623  
Au 14.56943965620682 6.43087865583939 16.56622812251147  
Au 16.52290995489595 20.53512466284107 12.51027125958167  
Au 8.36504768799038 8.34002992132472 8.36507917062124  
Au 10.38294028170924 6.37073456154360 8.37897162754741  
Au 16.58279194388212 8.41716013962368 16.58283335226686  
Au 12.50354174694586 18.54107068118250 6.45892217575424  
Au 16.53415746356974 12.50341336985833 12.49659668038766  
Au 10.36241548749757 18.66051161465575 16.66716689802711  
Au 16.59143062951864 14.60893513647893 18.60140156170964  
Au 14.61704996239785 8.37893890405465 6.37072313215468  
Au 18.56243468001484 12.49999284906343 6.43755343950602  
Au 20.53512632180107 12.51026514085531 8.47708233386808  
Au 12.49680124518200 4.50786207175528 16.49531566624326  
Au 10.38292156965908 16.62105088683490 18.62930297384667  
Au 16.63496457203931 16.66000451638256 16.63499282007891  
Au 18.54109210292256 6.45890506543697 12.49643874916204  
Au 8.40858052197564 18.60134092684287 14.60886151423450

|    |                   |                   |                   |
|----|-------------------|-------------------|-------------------|
| Au | 8.40861006539980  | 10.39115353445619 | 6.39869113702138  |
| Au | 8.33283524455394  | 10.36242529029080 | 18.66049649396514 |
| Au | 12.49885129278582 | 4.327944487918923 | 12.49885298275384 |
| Au | 14.57151116715624 | 16.54182956128652 | 10.47492669811211 |
| Au | 14.49417014783499 | 10.50582856630707 | 20.56355451832419 |
| Au | 10.49187675263572 | 20.58221410794505 | 14.51832805097137 |
| Au | 6.39865385886191  | 16.59138262945272 | 14.60886462315470 |
| Au | 12.50333825849462 | 12.49659651334504 | 8.46577434396255  |
| Au | 8.45814664847953  | 14.52499231320657 | 14.57148659262231 |
| Au | 12.49680657944040 | 8.50466293480069  | 20.49213470049440 |
| Au | 20.56356794119005 | 10.50582026386700 | 14.49416693562413 |
| Au | 6.39868739392937  | 10.39114681379351 | 8.40863219943780  |
| Au | 12.49047453191212 | 10.47431117150490 | 14.52560934150326 |
| Au | 10.47433212752742 | 12.49054550561245 | 10.47425506253534 |
| Au | 6.43095940970583  | 14.56939685784892 | 8.43384517437801  |
| Au | 16.54177405333319 | 10.47495663906906 | 10.42843799938453 |
| Au | 4.46490623678486  | 8.47710212645554  | 12.51028035274507 |
| Au | 12.49885598695392 | 12.50113504355350 | 20.67208868115767 |
| Au | 10.48164741921068 | 4.41780731252051  | 14.50808762519820 |
| Au | 12.49998556099474 | 6.43760007753282  | 6.43759786857216  |
| Au | 18.60137601960288 | 8.40855694012792  | 10.39107888329425 |
| Au | 16.54179146977640 | 14.57152617846343 | 14.52500064797926 |
| Au | 12.48766622197161 | 14.53844192356176 | 18.54115894969839 |
| Au | 16.66715783299454 | 14.63757898139671 | 6.33946608208491  |
| Au | 8.50465797592650  | 20.49212063865963 | 12.50317085784433 |
| Au | 6.43095534303100  | 16.56616217029519 | 10.43058951039468 |
| Au | 14.49416039230261 | 4.43645305734923  | 14.49414950711711 |
| Au | 10.46162324694469 | 14.53837438302524 | 20.63723657123568 |
| Au | 14.53844208588499 | 18.54119283719539 | 12.51228738964147 |
| Au | 14.51831811931023 | 14.50809925276805 | 4.41779058012186  |
| Au | 8.37893612640947  | 14.61706117811224 | 18.62928149577943 |
| Au | 4.46489711271583  | 12.48971683603489 | 16.52292001688189 |
| Au | 10.39109324307575 | 8.40858697662970  | 18.60134753161898 |
| Au | 8.43381800687761  | 14.56938949720571 | 6.43095655692391  |
| Au | 14.53834707188786 | 10.46164977096235 | 4.36280270514938  |
| Au | 10.39109671089507 | 6.39864353497232  | 16.59139150467784 |
| Au | 16.62107772022005 | 18.62932892570610 | 14.61707573763629 |
| Au | 6.45886686249934  | 12.48769693886018 | 14.53841837221506 |
| Au | 6.45886093693904  | 10.46156306772942 | 12.51229761541431 |
| Au | 18.56245568929565 | 18.56245759875410 | 12.49999487397809 |
| Au | 18.54120901515995 | 12.51229694593981 | 10.46148300019841 |
| Au | 8.46566642896812  | 12.49658264126905 | 12.50343716835178 |
| Au | 8.47707066815830  | 12.51026982927319 | 20.53513720285128 |
| Au | 12.48971217567302 | 16.52293220898498 | 20.53515672832701 |
| Au | 16.56622517642601 | 6.43085992815930  | 14.56943736994018 |
| Au | 4.50790184156930  | 12.49682978797951 | 8.50468970024729  |
| Au | 10.47496311026384 | 10.42850448586027 | 8.45821037012890  |
| Au | 14.63759001892812 | 16.66717935065416 | 18.66054131959635 |
| Au | 4.36281445155129  | 10.46165300436492 | 14.53834598144311 |
| Au | 18.54111237894872 | 12.50355186541140 | 18.54110264644332 |
| Au | 12.51226349037917 | 18.54115347242982 | 14.53843689679583 |
| Au | 14.60887472143741 | 16.59141363404975 | 6.39863669186645  |
| Au | 6.37074340216228  | 8.37896554749258  | 14.61705229885620 |
| Au | 12.50334471789803 | 16.53428499582656 | 12.50342779803336 |
| Au | 10.36243510194426 | 8.33285636890117  | 6.33951532496171  |
| Au | 20.63725202764644 | 14.53837779996267 | 10.46161043795277 |
| Au | 12.49998599574335 | 18.56243992773384 | 18.56244203149766 |
| Au | 14.52565217216110 | 10.47438852739243 | 12.49053037546843 |
| Au | 14.50808648256925 | 4.41779024151960  | 10.48165096876225 |
| Au | 12.50315414990013 | 20.49213672271510 | 8.50466110877124  |
| Au | 20.58226932316099 | 14.51836944254647 | 14.50810224996916 |
| Au | 16.66716912213632 | 18.66053385870092 | 10.36240130667846 |



Au 12.48970644543212 4.46489013051079 8.47709188239522  
 Au 8.50467584049394 12.49682978470803 4.50790978650663  
 Au 8.47707481273529 4.46489757438535 12.48971910245056  
 Au 14.51832358392840 20.58223304387992 10.49188614688779  
 Au 14.63756819221911 6.33948282607140 8.33283551428326  
 Au 14.60888074871473 18.60136200636396 8.40857596959969  
 Au 16.62105356869192 10.38293107055879 6.37069729274711  
 Au 12.51226860994553 10.46152677008630 6.45883241931731  
 Au 12.50939298181529 14.52564947622805 10.47426501555403  
 Au 10.42846239644272 8.45819033377439 14.52496323034921  
 Au 10.46155098904522 12.51229655448152 18.54111263762742  
 Au 18.56915035991746 8.43373862863842 14.56942605444341  
 Au 6.33952276309065 8.33286666393681 10.36243292393630  
 Au 12.49643169967387 6.45891293596839 18.54106907647527  
 Au 12.51026229476326 20.53512679333755 16.52293405014483  
 Au 10.50583992385695 14.49415588843821 4.43650674282040  
 Au 14.52500559639490 14.57155626538366 16.54182946401499  
 Au 10.43058787981666 16.56618039853514 6.43093317740757  
 Au 8.33283400938080 6.33950555803928 14.63755150004310  
 Au 16.63494065644164 8.36502119971069 8.34001235898706  
 Au 14.53835784626951 20.63722829207857 14.53835520222560  
 Au 16.49532096582944 4.50785341349436 12.49681926452935  
 Au 20.67212778443950 12.50113654275344 12.49885135466509  
 Au 18.56915265132823 10.43055705635175 16.56625169869057  
 Au 8.45816889976305 10.42847827385404 10.47496823096222  
 Au 8.43380377056308 18.56904433516422 10.43058487233575  
 Au 14.61707420441370 18.62930964592702 16.62108698551539  
 Au 4.41781497691309 14.50809749200690 14.51831139545242  
 Au 18.62933680752883 16.62108133465664 10.38291964404452  
 Au 12.48766841534784 6.45883219895510 10.46152475801824  
 Au 12.50111491082429 20.67206453437917 12.50112054672122  
 Au 14.53845882993008 12.48770164850638 6.45879023278078  
 Au 18.54120696942784 14.53849527596750 12.48768835796450  
 Au 18.66053668806549 10.36242092025152 8.33281785068982  
 Au 4.50788138984239 16.49531771793668 12.50317522153619  
 Au 16.56623295611267 10.43053866504068 18.56913537239301  
 Au 12.49648852062331 8.46574971451400 12.49658225900018  
 Au 14.50810457291870 14.51835397657378 20.58225324068949  
 Au 12.50111519426373 12.49887735108696 4.32797067775799  
 Au 6.45896301488627 12.49644342587534 6.45896548409756  
 Au 6.43759852372902 6.43761833102375 12.49999520677033  
 Au 20.58224692237950 10.49188662321709 10.48162611584656  
 Au 6.45893553819594 18.54105237452233 12.50355244970665  
 Au 14.56944728090050 8.43375249446915 18.56911061267617  
 Au 16.59140114070046 6.39862517661912 10.39107623748477  
 Au 6.33950279944989 14.63756994324716 16.66714985399475  
 Au 6.43758559944585 12.49999288911548 18.56240668925586  
 Au 16.65998538778226 16.63498276092039 8.36501324454003  
 Au 20.53514240085477 16.52292114959821 12.48972625047498  
 Au 8.34000490735027 8.36505908411330 16.63493259511043  
 Au 18.62933254736150 14.61706297575449 8.37891487579110  
 Au 8.36502249722750 16.63494502857237 16.65999818763031  
 Au 4.43651200402140 14.49414577615422 10.50584828951660  
 Au 4.32799546039870 12.49887614579414 12.50112087230372  
 Au 12.51026459789223 8.47709382283507 4.46491602132038  
 Au 14.57149266972622 14.52503948803150 8.45817217872342  
 Au 10.48164708683837 10.49188449184178 20.58221672648189  
 Au 12.50315536748254 16.49533115747195 4.50787538734629  
 Au 10.50583443828911 20.56351239557168 10.50583223848631  
 Au 8.37895315010363 6.37075425131662 10.38294486603850  
 Au 4.41783061196637 10.48169310863191 10.49189666332977  
 Au 20.49216592224705 12.50316989643754 16.49534783350779

|    |                   |                   |                   |
|----|-------------------|-------------------|-------------------|
| Au | 10.49189203590918 | 10.48168205582418 | 4.41782867724319  |
| Au | 14.52501365311384 | 8.45818405446709  | 10.42842117068240 |
| Au | 6.37074470881996  | 10.38293253178693 | 16.62104028027173 |
| Au | 8.41722808472054  | 16.58274012183390 | 8.41726618246216  |
| Au | 16.49533928841149 | 12.50317071801556 | 20.49216877945173 |

**Pd<sub>43</sub>Au<sub>158</sub>LEH-687.399**

|    |                   |                   |                   |
|----|-------------------|-------------------|-------------------|
| Pd | 6.43917425396272  | 10.48365528441463 | 12.49315811151152 |
| Pd | 18.56573857593971 | 14.52047825266606 | 12.49208026484913 |
| Pd | 16.56569934649581 | 16.55197119134480 | 12.49040927459586 |
| Pd | 10.42716547006311 | 14.55753160852286 | 16.55278549778774 |
| Pd | 8.43689805810295  | 12.50205941000806 | 16.56908558689893 |
| Pd | 10.46357004916177 | 10.48227568670157 | 12.48916643936979 |
| Pd | 10.47254829619220 | 6.44947800700273  | 12.49384380215338 |
| Pd | 14.54135640024584 | 14.52921798086873 | 12.48364700700526 |
| Pd | 14.53639701805965 | 10.48237567503584 | 12.48929528559147 |
| Pd | 14.52739016605629 | 6.44947082837256  | 12.49396419881143 |
| Pd | 10.47641036907238 | 18.53727638740384 | 12.49349272170548 |
| Pd | 16.56853344383909 | 12.50244335647531 | 8.44346967344504  |
| Pd | 16.56299264520094 | 12.50197369902049 | 16.56929095648076 |
| Pd | 10.45871720034549 | 14.52924454787385 | 12.48353349968322 |
| Pd | 8.43154961765476  | 12.50251126186039 | 8.44320070141725  |
| Pd | 10.43295089455665 | 10.45394187777824 | 16.54612013550190 |
| Pd | 6.43421900195381  | 14.52053072544298 | 12.49186430562401 |
| Pd | 12.50014725761717 | 16.54652351948544 | 8.44600100966987  |
| Pd | 14.57289930029913 | 14.55752642280200 | 16.55279357786395 |
| Pd | 14.52366380739971 | 18.53717427092095 | 12.49360796624808 |
| Pd | 14.56692772035241 | 10.45397645008938 | 16.54614756515237 |
| Pd | 18.56062055538940 | 10.48361547517730 | 12.49342979627558 |
| Pd | 16.56365268847797 | 8.45010371509904  | 12.49213824166581 |
| Pd | 8.43443227864286  | 16.55195878774370 | 12.49024064973144 |
| Pd | 8.43624660828183  | 8.45010387715626  | 12.49179031121467 |
| Pd | 12.50003921946253 | 8.45808359160782  | 8.45563375214175  |
| Pd | 18.56112001775953 | 12.50294519798079 | 10.47451765361089 |
| Pd | 6.43890956907051  | 12.50299939573519 | 10.47431433172206 |
| Pd | 12.49995400833487 | 14.52405076490632 | 18.57757562170054 |
| Pd | 14.54090506063225 | 12.50110091056520 | 6.44321483939372  |
| Pd | 12.50002549230292 | 6.44939606043827  | 10.47104769879662 |
| Pd | 12.50000770853530 | 14.52608502219713 | 14.50994401883845 |
| Pd | 18.55903506639762 | 12.50257763352032 | 14.52656469948129 |
| Pd | 6.44078286205396  | 12.50257802241488 | 14.52635574751641 |
| Pd | 12.50008240550561 | 18.54088472223971 | 10.46766252987234 |
| Pd | 12.50019540904646 | 14.53614043295744 | 6.44722567835792  |
| Pd | 12.49998647540719 | 18.51687879649923 | 14.53933955124767 |
| Pd | 12.49989579084485 | 10.48274693034243 | 18.57006662930262 |
| Pd | 14.53731498320092 | 12.50677533821772 | 10.46837058822846 |
| Pd | 12.50013969304936 | 10.46658072288066 | 6.44836032904844  |
| Pd | 10.45937830781761 | 12.50113649641127 | 6.44310376086629  |
| Pd | 12.49990024983398 | 6.46911735585359  | 14.54313316117021 |
| Pd | 10.46284653807653 | 12.50678002005381 | 10.46830665078226 |
| Au | 14.50200889592540 | 14.49660312313210 | 4.44192049946781  |
| Au | 12.49978450903726 | 6.45233839439464  | 18.57033348596430 |
| Au | 8.38159860998471  | 10.39029319106538 | 18.61759006936681 |
| Au | 12.49988710097587 | 4.51092472313707  | 16.51605237937653 |
| Au | 20.51497442117617 | 12.49925332955896 | 16.51151846549290 |
| Au | 10.49221515101919 | 14.49980538184214 | 20.60220605200761 |
| Au | 10.35238845177457 | 18.62736136469153 | 16.65039209065754 |
| Au | 20.56858471293885 | 14.49557257163719 | 14.49862472785870 |
| Au | 20.56146370509593 | 10.50497441256246 | 14.49605996002999 |
| Au | 10.49838117365110 | 14.49663363337698 | 4.44185486506687  |
| Au | 10.37392672899754 | 8.39443384865350  | 18.63291068165567 |
| Au | 4.43124744052488  | 14.49553310465338 | 14.49828105200582 |

Au 14.64177151423932 6.36344628417151 16.64859703060279  
 Au 6.38074423606179 10.39891959122198 16.61066747831248  
 Au 12.50011541549337 6.46799244649263 6.46172450682933  
 Au 14.62984518666294 16.60514762066771 18.63946267209874  
 Au 14.50092762298938 4.43638199348439 10.50365470472440  
 Au 6.37875091122161 8.38657859310783 14.60980167824029  
 Au 14.62314638301948 6.38482695805715 8.38283446180909  
 Au 10.50015418262924 20.55211151328013 10.50332593891894  
 Au 8.37878299599963 6.37712884010114 10.38941271932761  
 Au 10.36490849156139 16.62788251152255 6.36931952141223  
 Au 18.62105403809423 8.38657596567786 14.61016032131625  
 Au 14.49273559736536 20.52916970209442 14.50397675950991  
 Au 6.37096564617018 14.62586940348650 8.37471317831516  
 Au 6.44301807204802 6.44599008037707 12.50664224075929  
 Au 8.38199617517509 18.60377358485015 14.61136564725929  
 Au 18.55690864254624 6.44588573646853 12.50674161409669  
 Au 6.44745467573370 12.49923539532612 6.44853934940880  
 Au 18.63006564186120 16.61201403670714 14.60874269681869  
 Au 16.66013308492717 8.34169288158198 16.66958842831541  
 Au 6.37801760009945 10.37794184107323 8.38106977781066  
 Au 6.37557507488529 16.61257949749306 10.38688424052496  
 Au 16.66844999883186 16.66077530408346 16.67666406624825  
 Au 14.64756072858019 18.62731600243109 16.65049759731995  
 Au 16.62122566174902 6.37707752427091 10.38962189971258  
 Au 12.49990661741782 4.40106001844707 12.50648314139751  
 Au 10.50731062700053 20.52926697078490 14.50393506834930  
 Au 14.49396390080540 4.45668733978591 14.50714505779541  
 Au 12.50016424679907 12.50183628469219 4.38321573630024  
 Au 8.37161489246026 18.62105586098715 10.38100232590565  
 Au 10.37701040319404 6.38476635901993 8.38268752721788  
 Au 12.50006957144665 20.59101674574412 12.50394188745212  
 Au 18.61522489563901 8.38885692803943 10.38968937607651  
 Au 10.37096915552379 8.37647884181251 6.37844198850769  
 Au 16.62289927379990 6.37791128425201 14.61377970534746  
 Au 14.49945702286488 10.50444294907279 4.44299802535607  
 Au 14.62932836795012 8.37641626838834 6.37855998164920  
 Au 18.56259622121931 18.55193652270055 12.50411887186974  
 Au 6.36991268608835 16.61211118722752 14.60851402785592  
 Au 16.61797692596598 18.60369933924409 14.61159601283024  
 Au 18.62920529848585 14.62564445469896 8.37500034235963  
 Au 10.49862095533233 10.49890004982513 20.59812300264249  
 Au 6.38473372670247 8.38884439140404 10.38934642018877  
 Au 8.33952881018559 8.34173679778895 16.66937862777941  
 Au 18.62448572809767 16.61244501759361 10.38706301619290  
 Au 18.56122040016530 12.49645477064782 18.57158261285591  
 Au 14.50741815952742 14.49990415660694 20.60223906543259  
 Au 8.36794292821879 10.37453449687840 6.36874289496037  
 Au 14.50098714781646 10.49883948754598 20.59826312451887  
 Au 4.42486456675842 14.49973034974935 10.50070932694016  
 Au 16.62854989128433 18.62092456535235 10.38104535914755  
 Au 4.42725022125504 10.50173241473494 10.50418059589486  
 Au 12.49983071948477 18.52757308223637 18.55904255021765  
 Au 16.63235795935792 10.37444958661049 6.36895943907194  
 Au 8.37590082562960 14.60959464479413 18.62137765852607  
 Au 10.36992094785486 16.60511134430449 18.63934988788753  
 Au 20.57271769537664 10.50166292876785 10.50462418147991  
 Au 4.37060926133345 12.50178821204280 12.50001035731920  
 Au 14.63050954519690 18.61711457391021 8.37397322006453  
 Au 16.63796974880881 14.62836037074751 6.36509261470958  
 Au 6.43751678309679 18.55195797052781 12.50398319158730  
 Au 6.43849860916319 12.49640873385886 18.57126466003737  
 Au 18.61897388660280 10.39884304062115 16.61094677917612

Au 8.37697519493082 6.37803804929135 14.61360338053630  
 Au 4.43819160314623 10.50502913262058 14.49569659112844  
 Au 8.27800810415085 8.28508385351834 8.28475675897841  
 Au 10.49912179854167 4.43645364914279 10.50355606743071  
 Au 20.62924193246930 12.50169400380555 12.50025530527829  
 Au 16.73358659289201 16.72495908835879 8.27258814564825  
 Au 20.57527110056136 14.49951839202154 10.50105004134577  
 Au 16.72217491224305 8.28501790762946 8.28496468284211  
 Au 18.55289249819666 12.49910925252036 6.44886769699253  
 Au 18.62209426502189 10.37787756157298 8.38142647676375  
 Au 10.50575003933842 4.45685241146442 14.50715831375681  
 Au 18.62523166343832 14.60111256167267 16.61461939647041  
 Au 6.37457228250080 14.60107255345892 16.61433113422896  
 Au 8.26656021120866 16.72507147938124 8.27249061460830  
 Au 16.61805504085254 10.39028779270371 18.61784495099180  
 Au 14.50005265522828 20.55197441654157 10.50337300926680  
 Au 8.36236096697178 14.62849758369249 6.36494920025530  
 Au 14.63545220798698 16.62788934746346 6.36931688166617  
 Au 14.62572441280720 8.39440328229896 18.63294928874314  
 Au 10.35795031884695 6.36354060418993 16.64861045489981  
 Au 12.49989176868468 12.50122469046466 20.70534889350563  
 Au 16.62380784425660 14.60965906434942 18.62159572108301  
 Au 10.50089204985511 10.50450182613881 4.44292939412686  
 Au 10.36968634368800 18.61706105433530 8.37391818299989  
 Au 8.33146596345440 16.66080122416146 16.67650616285331  
 Au 12.50023112241563 18.53409918281266 6.45908074175345  
 Au 16.52109490413841 12.49594338469714 20.52910609077276  
 Au 12.50015438434519 8.50256875827446 4.49440771387029  
 Au 16.50483150065364 12.50024910263746 4.49107391864265  
 Au 12.49999846295744 16.55872198279980 12.50284518851874  
 Au 12.49975489973305 8.49819088400959 20.51475086871891  
 Au 20.51667341386169 16.49841591172900 12.49782276512706  
 Au 12.50008153155769 20.49024919021971 8.49853091932777  
 Au 12.49983177089654 16.49567417609367 20.52406996348942  
 Au 12.50009167703822 4.50333793267033 8.50058597095826  
 Au 16.49288044742907 20.49003903741618 12.50204107513101  
 Au 20.50180950040558 12.49712702217297 8.49877980103700  
 Au 4.48465901886533 12.49917550733048 16.51122766497108  
 Au 8.50722928488642 20.49016185815881 12.50188491720008  
 Au 12.49990774849160 12.52684052722154 16.54823481710328  
 Au 12.49999375581607 12.52563115940784 12.48838209596711  
 Au 12.49997033502489 8.42037151798732 12.50012278099632  
 Au 4.48344793923916 16.49859155554587 12.49760107920421  
 Au 14.55446744990886 10.47285844959561 8.43313660963184  
 Au 12.50007143256124 12.50232217456317 8.39750488135531  
 Au 12.49987050134833 8.49825360009401 16.56281251198205  
 Au 12.50012184479836 16.49576684042652 4.49469171166605  
 Au 12.50002903588775 20.47173332034300 16.51058030924487  
 Au 16.57307939157014 12.50458505987737 12.49150637112894  
 Au 8.47831212454121 12.49601040194582 20.52884782163234  
 Au 12.49995502791973 16.47852219373583 16.54685371377650  
 Au 10.44054311732831 14.53273637059404 8.42619062724433  
 Au 4.49851446913197 12.49729896211472 8.49837948368402  
 Au 16.49242005963378 4.49330456389200 12.50375973016060  
 Au 8.50751853755961 4.49341236873108 12.50355826804003  
 Au 10.44567738722363 10.47291300112808 8.43302656101862  
 Au 14.55966037775746 14.53274522049880 8.42631488011285  
 Au 20.50700241533378 8.50012073742154 12.49620727467474  
 Au 8.49567526057511 12.50034823399922 4.49084307662687  
 Au 8.42684640703604 12.50459214171069 12.49131293656928  
 Au 4.49288789574605 8.50017588246939 12.49577507638335  
 Au 14.53851180933714 12.52830724299557 14.54163808933940

|    |                   |                   |                   |
|----|-------------------|-------------------|-------------------|
| Au | 16.56358589125555 | 14.53108260789085 | 10.45751464286881 |
| Au | 8.43689590634034  | 10.46886014551884 | 14.52835289054727 |
| Au | 14.50696977837598 | 12.50276030861829 | 18.52425088460067 |
| Au | 12.49997815968021 | 10.48414732362499 | 14.51588448960471 |
| Au | 10.44505246547684 | 16.56002671872515 | 10.45957733094199 |
| Au | 10.44933022397831 | 16.52996932862348 | 14.52047766868368 |
| Au | 10.46142922408938 | 12.52827924794286 | 14.54155824287215 |
| Au | 10.49277178142427 | 12.50263735781789 | 18.52422253077689 |
| Au | 14.55506506024837 | 16.56005058829373 | 10.45965331488752 |
| Au | 14.56652571505105 | 8.44733057098702  | 14.51847539633906 |
| Au | 14.55138785773686 | 8.44276945581950  | 10.46666233325120 |
| Au | 10.44864293195726 | 8.44270649215093  | 10.46659481217693 |
| Au | 12.50008251527776 | 14.51716494563848 | 10.47020514596981 |
| Au | 16.57405245308638 | 14.54312303074182 | 14.53216403432419 |
| Au | 16.56295694203295 | 10.46893184041234 | 14.52852992792403 |
| Au | 10.43328390082739 | 8.44731808071521  | 14.51835886066303 |
| Au | 8.42587926447166  | 14.54313418948021 | 14.53204400991656 |
| Au | 12.50002279791486 | 10.49540614115578 | 10.48397850745531 |
| Au | 8.44347179187706  | 10.47635624057218 | 10.46315455104023 |
| Au | 8.43648505338926  | 14.53109359899091 | 10.45736366522469 |
| Au | 16.55654094364698 | 10.47631594236842 | 10.46335136601483 |
| Au | 14.55063934398176 | 16.52989516152183 | 14.52062599657779 |

**Pt<sub>40</sub>Au<sub>161</sub>L1<sub>0</sub>-696.745**

|    |                   |                   |                   |
|----|-------------------|-------------------|-------------------|
| Pt | 14.50205533083361 | 12.50010524947053 | 14.53815317434710 |
| Pt | 16.52482479436280 | 14.54803525936456 | 10.44590366409013 |
| Pt | 18.52110452815261 | 12.49994291429826 | 10.47312147078101 |
| Pt | 8.47519039344925  | 10.45200982437314 | 14.55406407457561 |
| Pt | 6.47903792305551  | 12.50006455742317 | 10.47291074843441 |
| Pt | 12.49988718529658 | 14.50001321399623 | 18.57812316324678 |
| Pt | 14.49975961966203 | 12.49981304843250 | 6.42204894584920  |
| Pt | 14.49957650878852 | 12.50011352127926 | 18.57801869748786 |
| Pt | 12.49990881811968 | 10.49797775041267 | 14.53820416285664 |
| Pt | 12.49992314339763 | 6.47889514062218  | 10.47332043368708 |
| Pt | 12.49989096280643 | 14.50219602378653 | 14.53796461589898 |
| Pt | 10.45193320352181 | 16.52477655576710 | 10.44572314966167 |
| Pt | 18.52107171335687 | 12.50010946166636 | 14.52718962790744 |
| Pt | 10.45183871693122 | 16.52481152420896 | 14.55384779578733 |
| Pt | 10.49782339628011 | 12.50012732861502 | 14.53807925138628 |
| Pt | 10.50021622770040 | 12.50012110098779 | 18.57810060320365 |
| Pt | 14.54806111464170 | 16.52471639524071 | 10.44587142889989 |
| Pt | 6.47902405075623  | 12.50007461828416 | 14.52697679708702 |
| Pt | 14.54795071454400 | 8.47527862512323  | 14.55412314809376 |
| Pt | 12.50000306149435 | 18.52104123374322 | 10.47285622309847 |
| Pt | 14.54802101841124 | 8.47524434156369  | 10.44623999959854 |
| Pt | 10.45186227617832 | 8.47523878112614  | 10.44611339026029 |
| Pt | 12.50010741343542 | 14.49959792600408 | 6.42195027273857  |
| Pt | 12.50000030254840 | 14.50204722287618 | 10.46184599172100 |
| Pt | 16.52477976507447 | 14.54816410939705 | 14.55407504739964 |
| Pt | 12.49990326318133 | 18.52107589788788 | 14.52663467259629 |
| Pt | 12.49988959084395 | 10.50025497348554 | 18.57806014025229 |
| Pt | 16.52473601210196 | 10.45208867685860 | 14.55417372423803 |
| Pt | 14.50210188003480 | 12.49999589536964 | 10.46200029659836 |
| Pt | 10.45180990672632 | 8.47520081411039  | 14.55406976985406 |
| Pt | 8.47520845107030  | 14.54815012045281 | 14.55398252473926 |
| Pt | 12.50010404926550 | 10.50006231824653 | 6.42199936061695  |
| Pt | 10.50043304281374 | 12.49985401524227 | 6.42196994271576  |
| Pt | 12.49995894235126 | 10.49790222437730 | 10.46206750209317 |
| Pt | 12.49984918094698 | 6.47887603323487  | 14.52701998272093 |
| Pt | 8.47526236842531  | 10.45194174729013 | 10.44594624592964 |
| Pt | 8.47518799266942  | 14.54813273083369 | 10.44572278383325 |
| Pt | 16.52478026322502 | 10.45191861491544 | 10.44617514481970 |

|    |                   |                   |                   |
|----|-------------------|-------------------|-------------------|
| Pt | 14.54798675175788 | 16.52483267400602 | 14.55384905609086 |
| Pt | 10.49789625980779 | 12.50000881259212 | 10.46189095034358 |
| Au | 14.51982525227600 | 14.51953289219955 | 4.41959232461054  |
| Au | 12.49985230803222 | 6.41951800346237  | 18.57214251405807 |
| Au | 8.33581986244603  | 10.34088685953238 | 18.67458456807659 |
| Au | 12.49984077555955 | 4.51038261975386  | 16.50011002182621 |
| Au | 20.48957197567239 | 12.50019542423279 | 16.50019090791058 |
| Au | 10.48017661254896 | 14.51989077255921 | 20.58048198825481 |
| Au | 10.38263194252819 | 18.61118812441154 | 16.60254394104681 |
| Au | 20.60044421790683 | 14.49511236705311 | 14.50138670211568 |
| Au | 20.60028641334129 | 10.50494743516908 | 14.50158505583619 |
| Au | 10.48043084537889 | 14.51962967348120 | 4.41962435182627  |
| Au | 10.34064456222359 | 8.33577771383452  | 18.67471664493929 |
| Au | 4.39959606366040  | 14.49518760397531 | 14.50119226665631 |
| Au | 14.61705164010902 | 6.38894634694987  | 16.60282022713581 |
| Au | 6.38896161137560  | 10.38280097023902 | 16.60287032635703 |
| Au | 12.50008087755151 | 6.41946114632082  | 6.42824651016484  |
| Au | 14.65898349687119 | 16.66435504719657 | 18.67439097041520 |
| Au | 14.49505139049228 | 4.39942903914900  | 10.49890729548087 |
| Au | 6.34664547453418  | 8.35705639704347  | 14.62912075043795 |
| Au | 14.61721927353306 | 6.38886742166825  | 8.39760052979601  |
| Au | 10.50501592166388 | 20.60056447788600 | 10.49848529837707 |
| Au | 8.35699036165206  | 6.34638790746423  | 10.37108922565378 |
| Au | 10.34071443037225 | 16.66437150569816 | 6.32516731112014  |
| Au | 18.65336845928757 | 8.35701699940183  | 14.62936947481452 |
| Au | 14.49510322172517 | 20.60044494488781 | 14.50109969979143 |
| Au | 6.38892071557338  | 14.61737862117717 | 8.39691903804865  |
| Au | 6.39597072771698  | 6.39597632908308  | 12.50012198920980 |
| Au | 8.35702722389624  | 18.65365612973449 | 14.62871647373386 |
| Au | 18.60397881400537 | 6.39604501472119  | 12.50046882913969 |
| Au | 6.41980326084122  | 12.49985703804589 | 6.42796993701558  |
| Au | 18.65349786160101 | 16.64307852266460 | 14.62896708275644 |
| Au | 16.65740001624414 | 8.34246459798050  | 16.64817666394968 |
| Au | 6.38905653747412  | 10.38260681141522 | 8.39714573081190  |
| Au | 6.34655378845090  | 16.64308651648351 | 10.37061044160389 |
| Au | 16.65754509131087 | 16.65768698104976 | 16.64799533349558 |
| Au | 14.61713837795618 | 18.61109386536637 | 16.60251234347090 |
| Au | 16.64286023975739 | 6.34651848261862  | 10.37136479553313 |
| Au | 12.49984126161087 | 4.31731800510796  | 12.50001897483516 |
| Au | 10.50480759471748 | 20.60057784420174 | 14.50111730322032 |
| Au | 14.49493003199729 | 4.39939400514743  | 14.50141651533262 |
| Au | 12.50012587420216 | 12.49983590365023 | 4.34001851593441  |
| Au | 8.35711639692078  | 18.65362039801486 | 10.37066559344885 |
| Au | 10.38275853875484 | 6.38887199517612  | 8.39744962537693  |
| Au | 12.49997388625123 | 20.68249369854339 | 12.49987699094527 |
| Au | 18.65343571636864 | 8.35703141048973  | 10.37133783387389 |
| Au | 10.34092585955857 | 8.33562230435009  | 6.32549968928262  |
| Au | 16.64281573533433 | 6.34651166459131  | 14.62924643646638 |
| Au | 14.51980260216463 | 10.48012237185602 | 4.41959761247145  |
| Au | 14.65926982847262 | 8.33555373005471  | 6.32554262301265  |
| Au | 18.60397654726769 | 18.60387878185538 | 12.49981409652456 |
| Au | 6.34653132746408  | 16.64309003914886 | 14.62881671291537 |
| Au | 16.64296030510701 | 18.65357609928132 | 14.62887659101035 |
| Au | 18.61123194721006 | 14.61713388068118 | 8.39728272413972  |
| Au | 10.48024722019261 | 10.48042541114003 | 20.58055140978220 |
| Au | 6.34653919178923  | 8.35691647795873  | 10.37096768103938 |
| Au | 8.34242181499057  | 8.34238830536295  | 16.64821468626090 |
| Au | 18.65354127180207 | 16.64289973458994 | 10.37092093696080 |
| Au | 18.58028904688295 | 12.50026924266807 | 18.57204529518490 |
| Au | 14.51960498549361 | 14.51991166403093 | 20.58044781595473 |
| Au | 8.33589517890689  | 10.34048882286029 | 6.32536178283620  |
| Au | 14.51964147745701 | 10.48037284992942 | 20.58043723046499 |

|    |                   |                   |                   |
|----|-------------------|-------------------|-------------------|
| Au | 4.39976450650224  | 14.49509194905403 | 10.49849488093140 |
| Au | 16.64302657962901 | 18.65342307368135 | 10.37077242736091 |
| Au | 4.39964466760726  | 10.50479952315965 | 10.49856986709192 |
| Au | 12.49980966514139 | 18.58053839991788 | 18.57179151696571 |
| Au | 16.66434302130779 | 10.34036032674228 | 6.32555754101815  |
| Au | 8.33557597401854  | 14.65958162978887 | 18.67458467069495 |
| Au | 10.34057282059323 | 16.66449383685692 | 18.67455341168263 |
| Au | 20.60048220432043 | 10.50481581591182 | 10.49886924909977 |
| Au | 4.31778143258960  | 12.50001995275613 | 12.49990576865116 |
| Au | 14.61731210636611 | 18.61097199603380 | 8.39716882134434  |
| Au | 16.66436098841935 | 14.65907336166500 | 6.32551598608720  |
| Au | 6.39618968725510  | 18.60406606498632 | 12.49955918997030 |
| Au | 6.41959480178682  | 12.50022454093868 | 18.57185528754792 |
| Au | 18.61098603680597 | 10.38289545494671 | 16.60301422227207 |
| Au | 8.35698031891932  | 6.34642788269088  | 14.62910494327270 |
| Au | 4.39968595115950  | 10.50489675810982 | 14.50143574711142 |
| Au | 8.34239495470056  | 8.34225324564479  | 8.35188851179436  |
| Au | 10.50482459385483 | 4.39950201797571  | 10.49880141514280 |
| Au | 20.68247625457673 | 12.49992106655671 | 12.50021778740724 |
| Au | 16.65771860552226 | 16.65758190574596 | 8.35178436943618  |
| Au | 20.60062971928645 | 14.49501307880185 | 10.49874031004513 |
| Au | 16.65762473644434 | 8.34221573568280  | 8.35210078375761  |
| Au | 18.58050755346043 | 12.49968065421430 | 6.42832009640907  |
| Au | 18.61112358604053 | 10.38249836997936 | 8.39746621952396  |
| Au | 10.50492091302375 | 4.39943091841874  | 14.50139125429840 |
| Au | 18.61105003909487 | 14.61752094973573 | 16.60281399129934 |
| Au | 6.38887064703778  | 14.61753183309651 | 16.60269068326216 |
| Au | 8.34243917239625  | 16.65764575751480 | 8.35164902700286  |
| Au | 16.66417032394990 | 10.34076802397741 | 18.67465231643374 |
| Au | 14.49508293600237 | 20.60042402177632 | 10.49861315144440 |
| Au | 8.33579041493930  | 14.65932537171772 | 6.32521747805698  |
| Au | 14.65958326270613 | 16.66422081443713 | 6.32528150346505  |
| Au | 14.65913109272427 | 8.33573577089893  | 18.67462941688066 |
| Au | 10.38264668035577 | 6.38894453289840  | 16.60281346815334 |
| Au | 12.49997101909253 | 12.50018993548609 | 20.66006006192070 |
| Au | 16.66415262436189 | 14.65956500460388 | 18.67456902484821 |
| Au | 10.48045299709671 | 10.48014482869179 | 4.41951416803217  |
| Au | 10.38287670923189 | 18.61111740579502 | 8.39702052059745  |
| Au | 8.34237219008361  | 16.65772885710722 | 16.64794524019574 |
| Au | 12.50018347766792 | 18.58042914693449 | 6.42787377319650  |
| Au | 16.49882357377804 | 12.50012004719621 | 20.48818087945908 |
| Au | 12.50014955283108 | 8.50080354843214  | 4.51167205785469  |
| Au | 16.49918077336324 | 12.49972647484262 | 4.51194531283651  |
| Au | 6.45613639819836  | 10.46767481221852 | 12.49998786399417 |
| Au | 12.49995984644530 | 16.54077813197921 | 12.49978352621693 |
| Au | 12.49991970935278 | 8.50095831183446  | 20.48842341732566 |
| Au | 20.53980738709742 | 16.56083283438162 | 12.49996017767329 |
| Au | 12.50014368595464 | 20.48957532862276 | 8.49984413069343  |
| Au | 18.54403828910362 | 14.53240091730800 | 12.50002687255032 |
| Au | 12.49983703519823 | 16.49917221485522 | 20.48833559325986 |
| Au | 12.49997316626797 | 4.51043343953713  | 8.50036535212734  |
| Au | 16.56305708585274 | 16.56302062893453 | 12.49988460340549 |
| Au | 10.44042565694346 | 14.55965118925704 | 16.58053454195667 |
| Au | 8.46137392316739  | 12.50016646453760 | 16.54863944002365 |
| Au | 16.56086479190941 | 20.53972473893944 | 12.49981064727761 |
| Au | 20.48964407375899 | 12.49979573619611 | 8.50025134345409  |
| Au | 4.51053298524376  | 12.50015799332226 | 16.49985882637831 |
| Au | 10.47089456788752 | 10.47103604858823 | 12.49995236273501 |
| Au | 8.43920824133781  | 20.54001727524658 | 12.49976019460908 |
| Au | 12.49990026063606 | 12.50002890319918 | 16.55949691768579 |
| Au | 10.46748425310404 | 6.45596564085462  | 12.50014368878688 |
| Au | 12.49995260460963 | 12.50011199464116 | 12.49987181651705 |

|    |                   |                   |                   |
|----|-------------------|-------------------|-------------------|
| Au | 14.52898469223339 | 14.52900531010357 | 12.49990066865173 |
| Au | 12.49988019798583 | 8.45918647118728  | 12.50010379550722 |
| Au | 4.46036815969359  | 16.56093736910648 | 12.49980797228876 |
| Au | 14.52904217407842 | 10.47108096933280 | 12.50006754484820 |
| Au | 14.55950581400592 | 10.44039631728315 | 8.41959515908601  |
| Au | 14.53225271613456 | 6.45601858438533  | 12.50018769751482 |
| Au | 12.50008060234078 | 12.49988688114994 | 8.44053621135652  |
| Au | 10.46752309809633 | 18.54401576178790 | 12.49973333725834 |
| Au | 12.49987721722629 | 8.46139057719046  | 16.54867861945902 |
| Au | 12.50018720213000 | 16.49890341836860 | 4.51177408477460  |
| Au | 12.49993919690607 | 20.48952386599428 | 16.49960190521705 |
| Au | 16.54089343884507 | 12.50003684929337 | 12.50009216924924 |
| Au | 8.50093970943171  | 12.50019308227966 | 20.48823173537290 |
| Au | 16.53865408898741 | 12.49988934529891 | 8.45149425961075  |
| Au | 12.49983597335113 | 16.53879330731661 | 16.54844429948175 |
| Au | 16.53852719090795 | 12.50020099814988 | 16.54867750603235 |
| Au | 10.47093034644541 | 14.52901711991699 | 12.49982365317185 |
| Au | 8.46138511994164  | 12.49998184920739 | 8.45128340025949  |
| Au | 10.44054762361995 | 10.44058486817436 | 16.58061884348733 |
| Au | 10.44058750164629 | 14.55947073847685 | 8.41923040397308  |
| Au | 6.45609705123963  | 14.53248206872909 | 12.49983924298121 |
| Au | 4.51072840602621  | 12.49994234615544 | 8.49994714913607  |
| Au | 12.50002413349103 | 16.53862891167971 | 8.45120153960469  |
| Au | 14.55937667047458 | 14.55960562563723 | 16.58048757912319 |
| Au | 16.56081413690783 | 4.46020047985688  | 12.50019826794580 |
| Au | 14.53235354184968 | 18.54389367236559 | 12.49978774825369 |
| Au | 14.55926313879251 | 10.44065024593363 | 16.58065703917458 |
| Au | 18.54393311360464 | 10.46767437908584 | 12.50025298517659 |
| Au | 16.56298864997555 | 8.43702276582625  | 12.50028904171778 |
| Au | 8.43903101886581  | 4.46001365483581  | 12.50005701446718 |
| Au | 10.44055026945517 | 10.44041062754739 | 8.41953377833356  |
| Au | 8.43691774387384  | 16.56306267882221 | 12.49974976973119 |
| Au | 8.43688698410471  | 8.43696337982360  | 12.50004689607945 |
| Au | 14.55951429100984 | 14.55940118356634 | 8.41937433484864  |
| Au | 20.53968915062453 | 8.43922768848592  | 12.50030829687714 |
| Au | 12.50001267727087 | 8.46128598222859  | 8.45163821431472  |
| Au | 8.50125994260113  | 12.49984252830109 | 4.51172424789992  |
| Au | 8.45916946655409  | 12.50007373455565 | 12.49990644806683 |
| Au | 4.46040599764893  | 8.43926535113609  | 12.50002925085282 |

**Pt<sub>40</sub>Au<sub>161</sub>LEH-700.686**

|    |                   |                   |                   |
|----|-------------------|-------------------|-------------------|
| Pt | 6.54283907533454  | 10.42361189467421 | 12.50001521009825 |
| Pt | 12.50219711328981 | 16.49067825723272 | 12.49993487533625 |
| Pt | 10.56794784491542 | 10.44243058791301 | 12.50004749145669 |
| Pt | 12.49170818120028 | 12.43625063619136 | 16.44846566149945 |
| Pt | 10.53472030808000 | 6.55815605548826  | 12.50008047386905 |
| Pt | 12.50539092483224 | 12.47104344454052 | 12.50002686278706 |
| Pt | 14.47350358648242 | 14.49305431226503 | 12.50004959130704 |
| Pt | 12.49361529838023 | 8.44231354939683  | 12.50005510503728 |
| Pt | 14.43047963528527 | 10.43259907412134 | 12.50011364730852 |
| Pt | 14.47736612895934 | 10.41989086642603 | 8.55020992960762  |
| Pt | 14.44685426032560 | 6.55319157146728  | 12.50011660204705 |
| Pt | 12.49173970789467 | 12.43601898438501 | 8.55162554755527  |
| Pt | 12.49024191029331 | 8.47950294152612  | 16.48751177563908 |
| Pt | 16.41009812130368 | 12.41245318264454 | 12.50007601836232 |
| Pt | 10.52908739394036 | 14.48038275894902 | 12.50000829893310 |
| Pt | 10.51387432058378 | 10.42728639418813 | 16.43674874321730 |
| Pt | 14.47734429841930 | 10.42006364064127 | 16.45000202559280 |
| Pt | 16.43052085332539 | 8.49029620278484  | 12.50005993885380 |
| Pt | 10.51391784306635 | 10.42721699132417 | 8.56339925285778  |
| Pt | 8.54286655102649  | 8.49351354283254  | 12.50002585693354 |
| Pt | 12.4902923777528  | 8.47941627886063  | 8.51270344765311  |



Pt 8.56716471496177 12.41260890537807 12.50001210388891  
 Pt 14.48878307369719 12.50201941030147 14.50887299292077  
 Pt 8.57146651987650 10.42611497337083 14.48892394629139  
 Pt 12.49717970080532 10.44566986603164 14.46183052216811  
 Pt 12.48613442371107 6.53718687610621 10.50567913454151  
 Pt 12.50288397653992 14.49831374439592 14.47988948082434  
 Pt 10.50667816985115 12.51191663117662 14.50739031171021  
 Pt 14.53488520267208 8.44537903473884 14.57022317586106  
 Pt 14.53497257352861 8.44532630941675 10.43000270863187  
 Pt 10.45163529671855 8.44773894165383 10.43339786781215  
 Pt 12.50287485401855 14.49815294518577 10.52009425337531  
 Pt 16.40996982528461 10.41615944002125 14.49576418484941  
 Pt 14.48884971215317 12.50182220334564 10.49127991883344  
 Pt 10.45169221830372 8.44784427068019 14.56673526784690  
 Pt 12.49721137401942 10.44556838604870 10.53833134391446  
 Pt 12.48610346262201 6.53722923685821 14.49449934397592  
 Pt 8.57149115322672 10.42605477299390 10.51111930477865  
 Pt 16.41000951411407 10.41610636859481 10.50437416423905  
 Pt 10.50668194084815 12.51182811778393 10.49264868945762  
 Au 14.50892313507901 14.48923424774396 4.43003676938874  
 Au 12.50085414866480 6.53732540011326 18.58477523802877  
 Au 8.27784084430680 10.27733526193867 18.78683829389945  
 Au 12.50315690526801 4.58872035444658 16.50668941405032  
 Au 20.47201489221151 12.48305622325277 16.52209571014716  
 Au 10.48101743551493 14.48913836563923 20.57235009992247  
 Au 10.24063165625278 18.76481725422099 16.76109877952465  
 Au 20.49808729580807 14.45758436784040 14.52367326648487  
 Au 20.64478784398632 10.43381072165123 14.58258878547526  
 Au 10.48124831386266 14.48841394840982 4.42730394801641  
 Au 10.35372086829730 8.39368293690683 18.68889424390801  
 Au 4.48154431665996 14.46627939761857 14.52844192082497  
 Au 14.61199411243269 6.45588450180360 16.64624000213140  
 Au 6.25924185740662 10.26902198758281 16.79236554121075  
 Au 12.50087855856833 6.53738600042398 6.41533912588169  
 Au 14.70552049256431 16.70742734022587 18.69943699594481  
 Au 14.50337653351871 4.50956525808026 10.47016079250594  
 Au 6.41182376699170 8.43152342868009 14.64116322437692  
 Au 14.61206297425347 6.45592965718259 8.35385454246553  
 Au 10.45729544431459 20.59716163039037 10.44857856717225  
 Au 8.38854699708532 6.43698575755352 10.36361250793844  
 Au 10.28957080914580 16.70112625881973 6.30368271460498  
 Au 18.66596298470178 8.39650755332710 14.67582568340158  
 Au 14.52606401563218 20.59965450468478 14.54482545974944  
 Au 6.35371787194833 14.66181572509489 8.31338138575493  
 Au 6.49206099377665 6.53124999531201 12.50000278013563  
 Au 8.26112557192173 18.76170106266917 14.76352914886276  
 Au 18.52544040635298 6.57351661698883 12.50016145312845  
 Au 6.47637620695519 12.49142766487209 6.41658179709616  
 Au 18.66216733894329 16.70423538541523 14.73547649089836  
 Au 16.64213262661303 8.43483071816168 16.65785387445456  
 Au 6.25918213461617 10.26901883989119 8.20766678539151  
 Au 6.34076434942673 16.69500641764661 10.28156722375478  
 Au 16.72891149249316 16.75701488554482 16.76210698425310  
 Au 14.74893277224548 18.76484843385511 16.75831797106082  
 Au 16.62033397201638 6.46099706562209 10.37604018898691  
 Au 12.49513648213436 4.42857626831521 12.50009359668863  
 Au 10.45721131157449 20.59733016393404 14.55101949906890  
 Au 14.50345402721411 4.50954304304770 14.52999349366097  
 Au 12.49614966029947 12.42780619327153 4.25167234365234  
 Au 8.26107490088918 18.76161221056322 10.23610043209735  
 Au 10.38744416101795 6.44470575414706 8.34800153903694  
 Au 12.49238389599608 20.78055084757806 12.49983468975323

|    |                   |                   |                   |
|----|-------------------|-------------------|-------------------|
| Au | 18.66601022475572 | 8.39635251429579  | 10.32440208405199 |
| Au | 10.35363286806052 | 8.39354033254690  | 6.31117091654938  |
| Au | 16.62031655521220 | 6.46105851462597  | 14.62408621490908 |
| Au | 14.54970841164670 | 10.43597729579535 | 4.31601896551862  |
| Au | 14.64241749137135 | 8.39995832130354  | 6.32013349554894  |
| Au | 18.48548121919847 | 18.53579353878004 | 12.49995768294916 |
| Au | 6.34084705745693  | 16.69506586444790 | 14.71819755864862 |
| Au | 16.72078794548618 | 18.75315323915856 | 14.75618479865398 |
| Au | 18.65297062452081 | 14.67766336068084 | 8.30325375079814  |
| Au | 10.44755869564836 | 10.43306828258743 | 20.68682849647213 |
| Au | 6.41177506275732  | 8.43153172624752  | 10.35884051482000 |
| Au | 8.36737511140427  | 8.43078607520022  | 16.67231084728539 |
| Au | 18.66226800639681 | 16.70414167774597 | 10.26451428464084 |
| Au | 18.52740924307515 | 12.49501871104519 | 18.57103448654563 |
| Au | 14.50883651108028 | 14.48978617105513 | 20.56994760619152 |
| Au | 8.27779471860795  | 10.27714148470074 | 6.21308643995861  |
| Au | 14.54935379363848 | 10.43631827007412 | 20.68427009308425 |
| Au | 4.48144582220660  | 14.46613848617279 | 10.47172321202387 |
| Au | 16.72074755373927 | 18.75302345198923 | 10.24372807026045 |
| Au | 4.42311021941540  | 10.44476929632203 | 10.42755465796811 |
| Au | 12.49725845755482 | 18.54608465730093 | 18.53331307336737 |
| Au | 16.70464736621452 | 10.29482780896430 | 6.24644760631061  |
| Au | 8.32691237668965  | 14.67469970759861 | 18.69884090320755 |
| Au | 10.28929547328539 | 16.70171374658135 | 18.69602563424176 |
| Au | 20.64487157662576 | 10.43374028043411 | 10.41764617395159 |
| Au | 4.36090601798731  | 12.38894670461212 | 12.50002908746829 |
| Au | 14.74897146621867 | 18.76452477497046 | 8.24134557621275  |
| Au | 16.66650490165263 | 14.67958539434581 | 6.30746518684801  |
| Au | 6.50250320990068  | 18.53301489346551 | 12.49990621062649 |
| Au | 6.47633811849784  | 12.49159600529625 | 18.58344663141406 |
| Au | 18.75191906878924 | 10.27168860958757 | 16.77076541407584 |
| Au | 8.38858967933951  | 6.43702676188888  | 14.63636052983631 |
| Au | 4.42309561136732  | 10.44470539777831 | 14.57254866543621 |
| Au | 8.36731841663025  | 8.43076861588549  | 8.32772773748735  |
| Au | 10.49812061438680 | 4.48791757823271  | 10.46495973345010 |
| Au | 20.70032215153448 | 12.39310347214166 | 12.50011931793117 |
| Au | 16.72873308900558 | 16.75664262143054 | 8.23802312079019  |
| Au | 20.49819763939431 | 14.45745124815059 | 10.47643406398962 |
| Au | 16.64226454352741 | 8.43481663819983  | 8.34235852985003  |
| Au | 18.52762489152547 | 12.49481237016395 | 6.42930197559706  |
| Au | 18.75212620444568 | 10.27156875128909 | 8.22946449874974  |
| Au | 10.49805568306344 | 4.48786301318843  | 14.53507684837239 |
| Au | 18.65311703272791 | 14.67797172626764 | 16.69700169965999 |
| Au | 6.35358511696756  | 14.66202834066880 | 16.68662129789870 |
| Au | 8.27784207059739  | 16.74064887065291 | 8.25478739961893  |
| Au | 16.70439439577881 | 10.29499103602126 | 18.75374363238613 |
| Au | 14.52600598245947 | 20.59947320939361 | 10.45477330265185 |
| Au | 8.32703807519329  | 14.67450407321738 | 6.30101739819118  |
| Au | 14.70540597097229 | 16.70685822700971 | 6.30044146654452  |
| Au | 14.64219837445078 | 8.40009674698636  | 18.67994644456068 |
| Au | 10.38744300533418 | 6.44469510436509  | 16.65202225427165 |
| Au | 12.49597895538994 | 12.42873215144727 | 20.74849335155518 |
| Au | 16.66653690198422 | 14.67998185448197 | 18.69267497819368 |
| Au | 10.44731462676495 | 10.43265614472660 | 4.31328627330391  |
| Au | 10.24061247247301 | 18.76452261379899 | 8.23845685995126  |
| Au | 8.27770363621494  | 16.74092429188757 | 16.74501010907279 |
| Au | 12.49731663569098 | 18.54557452687666 | 6.46615633127603  |
| Au | 16.46930116806808 | 12.49147496979721 | 20.51196731217727 |
| Au | 12.50027888782073 | 8.51162135657591  | 4.38289207946187  |
| Au | 16.46965629506428 | 12.49116317051404 | 4.48818645211407  |
| Au | 12.50013699715238 | 8.51160709846636  | 20.61718679742323 |
| Au | 20.34950460696534 | 16.42231108970736 | 12.50001665433241 |

|    |                   |                   |                   |
|----|-------------------|-------------------|-------------------|
| Au | 12.49203310873848 | 20.47507028864059 | 8.51416819696810  |
| Au | 18.47646796465736 | 14.36744482688895 | 12.50000569973722 |
| Au | 12.49612539382057 | 16.45731354959352 | 20.43725655249460 |
| Au | 12.50318314673210 | 4.58877075810197  | 8.49339964009164  |
| Au | 16.54952491279903 | 16.51033576753470 | 12.49997328684817 |
| Au | 10.44084922503645 | 14.53011471100524 | 16.57489087640388 |
| Au | 8.46775188272626  | 12.38763849408680 | 16.55508425049268 |
| Au | 16.45679775050681 | 20.49752769883075 | 12.49992951329577 |
| Au | 20.47225041380932 | 12.48299444568549 | 8.47813557862451  |
| Au | 4.53263886538938  | 12.48304736409892 | 16.53063096264567 |
| Au | 8.54039650010663  | 20.47979319212722 | 12.49979215638123 |
| Au | 4.60671970047936  | 16.43262883842337 | 12.49996456086248 |
| Au | 10.49541983607789 | 18.53073607824647 | 12.49987981055055 |
| Au | 12.49618214348883 | 16.45662337801746 | 4.56228401426816  |
| Au | 12.49203878380766 | 20.47551594920560 | 16.48512991615070 |
| Au | 8.52493269133928  | 12.48568627125194 | 20.53107827707655 |
| Au | 16.52478938824164 | 12.38496011958190 | 8.44229798922546  |
| Au | 12.49946044622635 | 16.53762094551554 | 16.55855643690646 |
| Au | 16.52474553920754 | 12.38527723260521 | 16.55774232597088 |
| Au | 8.46782623862598  | 12.38737969407846 | 8.44486396936369  |
| Au | 10.44089723824568 | 14.52989273776405 | 8.42498833779823  |
| Au | 6.51727828629815  | 14.41951483388993 | 12.49993512315156 |
| Au | 4.53253735815458  | 12.48317126591335 | 8.46938211519507  |
| Au | 12.49951251056029 | 16.53744284418896 | 8.44133611995334  |
| Au | 14.55372263492701 | 14.52813370725695 | 16.57393355675558 |
| Au | 16.44110149684758 | 4.61281004620723  | 12.50004977647379 |
| Au | 14.51942445737070 | 18.52871085300381 | 12.49989696538530 |
| Au | 18.48869299471146 | 10.39499585855159 | 12.50005780272514 |
| Au | 8.57125031949978  | 4.59215632188901  | 12.49993981442331 |
| Au | 8.46534463797755  | 16.52681317900957 | 12.49988592715159 |
| Au | 14.55366557882668 | 14.52772849939963 | 8.42620316793203  |
| Au | 20.57130242387527 | 8.54270076114157  | 12.50009986144053 |
| Au | 8.52490821664838  | 12.48562959445654 | 4.46895600013700  |
| Au | 4.50445135533498  | 8.55875719558545  | 12.50005769873678 |
| Au | 16.55120274101960 | 14.51330736790222 | 10.42838997643040 |
| Au | 18.48033849523311 | 12.36044300102232 | 10.45744437540056 |
| Au | 6.52025873264644  | 12.38388770577379 | 10.46852597440299 |
| Au | 12.49376357256039 | 14.42710644842753 | 18.52318303400577 |
| Au | 14.49992099403059 | 12.39220361192536 | 6.48051106865388  |
| Au | 14.49974627709627 | 12.39255115287512 | 18.51960257283314 |
| Au | 10.43198762148203 | 16.56018632360213 | 10.42390368221886 |
| Au | 18.48027546332593 | 12.36049057368273 | 14.54260621215797 |
| Au | 10.43191210296514 | 16.56031958769606 | 14.57595299088432 |
| Au | 10.48059368761337 | 12.38736161326556 | 18.52216033070373 |
| Au | 14.57334605664063 | 16.55922944170718 | 10.42214168494453 |
| Au | 6.52025605980695  | 12.38393732049962 | 14.53135206542802 |
| Au | 12.50155087049956 | 18.52968188278829 | 10.48593771251265 |
| Au | 12.49383001462839 | 14.42662671246087 | 6.47676334052213  |
| Au | 16.55124336951737 | 14.51347907272760 | 14.57171143077607 |
| Au | 12.50155931247714 | 18.52970949382352 | 14.51384685220414 |
| Au | 12.49390551114462 | 10.40545474653857 | 18.53539041375247 |
| Au | 8.45094815294079  | 14.52222041255528 | 14.56522541534045 |
| Au | 12.49391896980478 | 10.40521277734826 | 6.46475493520103  |
| Au | 10.48060129307642 | 12.38704814771964 | 6.47780159881855  |
| Au | 8.45101534369028  | 14.52208954039539 | 10.43468320632704 |
| Au | 14.57344219469034 | 16.55942224193775 | 14.57782367746003 |

**Pt<sub>105</sub>Au<sub>300</sub>L1<sub>0</sub>-1497.798**

|    |                   |                   |                  |
|----|-------------------|-------------------|------------------|
| Pt | 12.02487744335333 | 12.02484430331275 | 5.88255213264884 |
| Pt | 14.00001616185089 | 10.02233786429816 | 5.92327485538384 |
| Pt | 15.97516889396578 | 12.02486810929823 | 5.88253547528681 |
| Pt | 10.02233668463991 | 14.00000710365287 | 5.92328886589284 |

|                      |                   |                   |
|----------------------|-------------------|-------------------|
| Pt 12.02487536982678 | 15.97516766082664 | 5.88254567763426  |
| Pt 14.00005203408579 | 14.00000463275811 | 5.82302297368641  |
| Pt 15.97517246363317 | 15.97513269566443 | 5.88253372093980  |
| Pt 17.97762852135811 | 14.00000398107241 | 5.92326850352120  |
| Pt 14.00002221858010 | 17.97765477321660 | 5.92325856985092  |
| Pt 11.93910505241722 | 7.93710096301761  | 9.89724476001881  |
| Pt 14.00002153398079 | 5.96094265614324  | 9.94018214413249  |
| Pt 16.06096258355926 | 7.93711730299327  | 9.89723228470753  |
| Pt 7.93708546280957  | 11.93906686917040 | 9.89725946931791  |
| Pt 9.92902548323006  | 9.92899459372063  | 9.89225527325625  |
| Pt 11.97911005495005 | 11.97905566013536 | 9.93048574569125  |
| Pt 14.00006114559917 | 9.95571642893335  | 9.93419545786235  |
| Pt 16.02098348756867 | 11.97907716175222 | 9.93045725319299  |
| Pt 18.07099749696090 | 9.92903428630165  | 9.89224718675562  |
| Pt 20.06285061849308 | 11.93908083981970 | 9.89724585042568  |
| Pt 5.96089491524807  | 14.00000474842123 | 9.94018233168165  |
| Pt 7.93707898236663  | 16.06095010651338 | 9.89725607281247  |
| Pt 9.95572434576812  | 14.00000425875794 | 9.93420795285931  |
| Pt 11.97910857770170 | 16.02095469946699 | 9.93049127272984  |
| Pt 14.00007998489667 | 13.99999868208064 | 9.94253304389974  |
| Pt 16.02097492256479 | 16.02091222965384 | 9.93046826648722  |
| Pt 18.04429860967502 | 13.99999477276653 | 9.93420626957661  |
| Pt 20.06285519852225 | 16.06091436936108 | 9.89725016946097  |
| Pt 22.03896040472631 | 13.99999969269028 | 9.94019176762850  |
| Pt 9.92900754484363  | 18.07102658038659 | 9.89225739504720  |
| Pt 11.93909491458561 | 20.06291829359071 | 9.89724161297341  |
| Pt 14.00005178813942 | 18.04429297777207 | 9.93419364059159  |
| Pt 16.06096321809312 | 20.06288496866954 | 9.89723309577743  |
| Pt 18.07101081993338 | 18.07096764871659 | 9.89226177224348  |
| Pt 14.00002002103677 | 22.03905777577845 | 9.94017380839889  |
| Pt 7.95752068860456  | 7.95751517110536  | 14.00001397915359 |
| Pt 9.97869922778091  | 5.98033075527493  | 14.00001900910302 |
| Pt 11.97060527303416 | 7.94605440625399  | 14.00001107844031 |
| Pt 14.00005886016259 | 5.92023047850183  | 14.00000108564411 |
| Pt 16.02950080797725 | 7.94606690254256  | 14.00001439424810 |
| Pt 18.02134352078426 | 5.98038282536785  | 14.00001909438929 |
| Pt 20.04243937990767 | 7.95758475915673  | 14.00001277422652 |
| Pt 5.98032538632644  | 9.97869309875862  | 14.00002011682834 |
| Pt 7.94604818942264  | 11.97055894423274 | 14.00001300338358 |
| Pt 9.93019892566996  | 9.93019586095534  | 13.99999375984949 |
| Pt 11.94499545313031 | 11.94497749101942 | 14.00002087366668 |
| Pt 14.00006229405281 | 9.92242474021118  | 14.00006284136338 |
| Pt 16.05508500283450 | 11.94494016678601 | 14.00002716879228 |
| Pt 18.06985463387333 | 9.93016181444839  | 13.99999062251692 |
| Pt 20.05388337586226 | 11.97056624197542 | 14.00001536606118 |
| Pt 22.01953456480832 | 9.97870413292605  | 14.00001680314569 |
| Pt 5.92015345781752  | 14.00000721301822 | 13.99999973894580 |
| Pt 7.94602287394641  | 16.02946961720748 | 14.00001578305570 |
| Pt 9.92245410504007  | 14.00001449043082 | 14.00006544962330 |
| Pt 11.94499313021495 | 16.05503655004202 | 14.00002817465898 |
| Pt 14.00001295046056 | 14.00000875114821 | 14.00000646997129 |
| Pt 16.05508358483055 | 16.05506770972249 | 14.00002434151304 |
| Pt 18.07761261808685 | 14.00000580486304 | 14.00005876681865 |
| Pt 20.05390660053211 | 16.02943919066466 | 14.00001139997824 |
| Pt 22.07961913240761 | 13.99999456597338 | 14.00000289554973 |
| Pt 5.98029668133071  | 18.02134431437393 | 14.00001729625120 |
| Pt 7.95749213031779  | 20.04251530981371 | 14.00001032676507 |
| Pt 9.93018300475770  | 18.06982637282257 | 13.99999560370535 |
| Pt 11.97059639905171 | 20.05395486058888 | 14.00001212677246 |
| Pt 14.00005397172819 | 18.07757668442898 | 14.00006190436948 |
| Pt 16.02950151413031 | 20.05392511809612 | 14.00001131092558 |
| Pt 18.06985980358999 | 18.06983740522048 | 13.99999058846295 |

|    |                   |                   |                   |
|----|-------------------|-------------------|-------------------|
| Pt | 20.04244718898915 | 20.04242868480152 | 14.00001142298320 |
| Pt | 22.01955186244298 | 18.02131223212084 | 14.00001821578553 |
| Pt | 9.97868825853303  | 22.01967705584670 | 14.00001398705901 |
| Pt | 14.00005799420640 | 22.07976737896679 | 13.99999829802761 |
| Pt | 18.02133360438783 | 22.01960662390403 | 14.00001602196056 |
| Pt | 11.93909197174284 | 7.93711913921798  | 18.10277376074009 |
| Pt | 14.00002588306646 | 5.96093338222847  | 18.05984953059875 |
| Pt | 16.06098153856269 | 7.93713087293415  | 18.10277817878909 |
| Pt | 7.93710879652631  | 11.93904800524327 | 18.10276333315441 |
| Pt | 9.92905148027490  | 9.92902213207215  | 18.10783153449657 |
| Pt | 11.97917455147444 | 11.97911964917116 | 18.06966127866467 |
| Pt | 14.00006261748164 | 9.95575122591832  | 18.06578443584727 |
| Pt | 16.02091923116830 | 11.97914644054666 | 18.06968413725085 |
| Pt | 18.07097302262286 | 9.92905839104826  | 18.10782855172056 |
| Pt | 20.06282311950925 | 11.93906477870693 | 18.10276742492089 |
| Pt | 5.96089505412297  | 14.00000315166588 | 18.05985354530232 |
| Pt | 7.93709593111237  | 16.06096125817597 | 18.10276306833609 |
| Pt | 9.95575582861086  | 14.00000579955973 | 18.06578367793728 |
| Pt | 11.97916462695833 | 16.02089258918931 | 18.06966672766070 |
| Pt | 14.00007709352714 | 14.00000345701139 | 18.05780837735687 |
| Pt | 16.02092596219978 | 16.02086298954980 | 18.06968843791185 |
| Pt | 18.04426477898943 | 14.00000323781791 | 18.06577633207603 |
| Pt | 20.06282950927964 | 16.06093104734721 | 18.10276870616808 |
| Pt | 22.03895172355577 | 13.99999816340514 | 18.05984577309605 |
| Pt | 9.92903208654590  | 18.07099179754298 | 18.10783474713074 |
| Pt | 11.93907860641611 | 20.06289254102801 | 18.10277786770635 |
| Pt | 14.00005917750050 | 18.04426014070815 | 18.06579400732485 |
| Pt | 16.06098476255343 | 20.06286510022884 | 18.10278907841331 |
| Pt | 18.07098056105009 | 18.07093883069365 | 18.10783292421671 |
| Pt | 14.00002170840758 | 22.03905773184404 | 18.05985708290957 |
| Pt | 12.02494795422333 | 12.02487900092220 | 22.11747958283258 |
| Pt | 14.00002264854513 | 10.02237597196261 | 22.07675598725648 |
| Pt | 15.97512268254743 | 12.02491757843602 | 22.11748778431699 |
| Pt | 12.02494438897783 | 15.97512172976626 | 22.11748432136171 |
| Pt | 14.00006080910136 | 14.00000300906357 | 22.17693837146457 |
| Pt | 15.97512471151713 | 15.97508175926854 | 22.11749800082470 |
| Pt | 17.97760038626392 | 13.99999893915971 | 22.07676054082660 |
| Pt | 14.00002082974015 | 17.97762337642840 | 22.07677300304048 |
| Pt | 10.02237184772378 | 13.99999982022135 | 22.07677563811670 |
| Au | 14.00001182507128 | 5.90378424594464  | 5.88905284426347  |
| Au | 13.99996120093955 | 8.02268058070472  | 4.01376092180176  |
| Au | 16.17413071250404 | 7.80707075727617  | 5.79018294146333  |
| Au | 7.80708134522139  | 11.82587702304064 | 5.79019076247124  |
| Au | 9.80651405138207  | 9.80649773374532  | 5.77455342696235  |
| Au | 9.98464441697017  | 11.97689904459463 | 3.92587685092843  |
| Au | 11.97690975227074 | 9.98462676518849  | 3.92586666615202  |
| Au | 14.00003003733501 | 11.99241485783627 | 3.75704342492150  |
| Au | 16.02312128997783 | 9.98461465048890  | 3.92586560720454  |
| Au | 18.19350133771731 | 9.80650004440779  | 5.77454315278891  |
| Au | 18.01537976876796 | 11.97688794336728 | 3.92586502614624  |
| Au | 20.19289136482927 | 11.82587472450424 | 5.79017793154923  |
| Au | 5.90381407106904  | 14.00000901362700 | 5.88905437408190  |
| Au | 8.02267021159401  | 14.00000108060903 | 4.01368908983922  |
| Au | 7.80710558741182  | 16.17407851322659 | 5.79023483752142  |
| Au | 9.98465882083381  | 16.02311502032753 | 3.92584946531771  |
| Au | 11.99244579627943 | 13.99999872720925 | 3.75703909992003  |
| Au | 14.00002466470134 | 16.00758692080312 | 3.75702772291354  |
| Au | 16.00760820197949 | 13.99999639792218 | 3.75703642411159  |
| Au | 18.01537193941930 | 16.02310868849748 | 3.92583908240482  |
| Au | 19.97723246527220 | 13.99999549946569 | 4.01382811544719  |
| Au | 20.19289056403312 | 16.17406737621957 | 5.79021912378851  |
| Au | 22.09614517548717 | 14.00000398605097 | 5.88907401668324  |

|    |                   |                   |                  |
|----|-------------------|-------------------|------------------|
| Au | 9.80651756685441  | 18.19351121679360 | 5.77454580064144 |
| Au | 11.97691443926484 | 18.01538083192653 | 3.92583523404328 |
| Au | 11.82589839247739 | 20.19294012659742 | 5.79015696422858 |
| Au | 13.99996647429547 | 19.97729814621980 | 4.01372844291876 |
| Au | 16.02312762157681 | 18.01536571269227 | 3.92582707598818 |
| Au | 16.17408336946607 | 20.19291502371385 | 5.79020227600480 |
| Au | 18.19350335163804 | 18.19349131779837 | 5.77454664704479 |
| Au | 14.00002547834026 | 22.09619975710024 | 5.88902768853621 |
| Au | 11.98655637263222 | 3.88596207587495  | 9.95683225675191 |
| Au | 14.00001681298690 | 3.99748777399259  | 7.98105841898086 |
| Au | 16.01348426847399 | 3.88595226027400  | 9.95682235667444 |
| Au | 7.79598043170646  | 7.79596723271538  | 9.79030628839365 |
| Au | 9.82314266424417  | 5.79563763555146  | 9.80079535422932 |
| Au | 9.83967820705536  | 7.82981873044009  | 7.82533383525324 |
| Au | 11.87212200425815 | 5.85929155295998  | 7.85433784016965 |
| Au | 14.00002423013277 | 7.93494332247709  | 7.90996374306563 |
| Au | 16.12791451587711 | 5.85927989065345  | 7.85432693206573 |
| Au | 18.17687612993168 | 5.79563361317695  | 9.80077809081815 |
| Au | 18.16033858313638 | 7.82980335637477  | 7.82532832181631 |
| Au | 20.20400404683322 | 7.79597031777244  | 9.79027132426627 |
| Au | 3.88596453204993  | 11.98653536972768 | 9.95679970991926 |
| Au | 5.79564481732872  | 9.82311426863543  | 9.80078323857762 |
| Au | 5.85929269566250  | 11.87209560633394 | 7.85431491632444 |
| Au | 7.82982083489692  | 9.83966995612832  | 7.82532306076448 |
| Au | 9.92575205504877  | 11.92747112083870 | 7.87961485524168 |
| Au | 11.92749842157433 | 9.92572921701426  | 7.87961773725543 |
| Au | 14.00004609890179 | 11.97424919160241 | 7.93398058941248 |
| Au | 16.07255107857956 | 9.92572534293018  | 7.87960645248393 |
| Au | 18.07428391135735 | 11.92746592533801 | 7.87962083384979 |
| Au | 20.17016349794523 | 9.83966228115912  | 7.82533852874448 |
| Au | 22.20429573348516 | 9.82311846561301  | 9.80076584906132 |
| Au | 22.14064552412651 | 11.87210208380673 | 7.85433985489633 |
| Au | 24.11392871592929 | 11.98653064704378 | 9.95679919292549 |
| Au | 3.99751046764075  | 14.00000283017775 | 7.98103649673669 |
| Au | 3.88595888924279  | 16.01347695858231 | 9.95681000688310 |
| Au | 5.85929298968624  | 16.12791260385856 | 7.85432434299158 |
| Au | 7.93495564209842  | 13.99999700537093 | 7.90997909421778 |
| Au | 9.92576345177912  | 16.07253469261522 | 7.87963019263010 |
| Au | 11.97427969856185 | 13.99999884570932 | 7.93398007864656 |
| Au | 14.00004358500000 | 16.02575279344394 | 7.93396655825639 |
| Au | 16.02576848806711 | 13.99999853874603 | 7.93398676683126 |
| Au | 18.07427582307665 | 16.07252160030600 | 7.87963775497217 |
| Au | 20.06503351848524 | 13.99998853743269 | 7.90999656797973 |
| Au | 22.14064847326766 | 16.12789475893844 | 7.85435793883000 |
| Au | 24.00240193571420 | 13.99999985306394 | 7.98106570698394 |
| Au | 24.11393462346442 | 16.01347108775921 | 9.95682162262088 |
| Au | 5.79561394633708  | 18.17689158656606 | 9.80078097158954 |
| Au | 7.82981623397100  | 18.16034183493728 | 7.82531339978973 |
| Au | 7.79595557063787  | 20.20404859874134 | 9.79029200642027 |
| Au | 9.83966866566258  | 20.17019984376951 | 7.82531316417719 |
| Au | 11.92749574889492 | 18.07428724151839 | 7.87960929373356 |
| Au | 14.00001643053140 | 20.06505196181517 | 7.90996520650920 |
| Au | 16.07254745112903 | 18.07426278798324 | 7.87961634268010 |
| Au | 18.16035152467911 | 20.17018660251356 | 7.82532510392133 |
| Au | 20.17017430248778 | 18.16033526964745 | 7.82534409211651 |
| Au | 20.20403119178460 | 20.20402688626315 | 9.79028115289006 |
| Au | 22.20432199104364 | 18.17686633095418 | 9.80078197289248 |
| Au | 9.82312639962966  | 22.20437110605508 | 9.80077628876644 |
| Au | 11.87211463497298 | 22.14070838514410 | 7.85431113412902 |
| Au | 11.98654840858635 | 24.11402222138730 | 9.95680919991807 |
| Au | 14.00002453080360 | 24.00248374588998 | 7.98102446403211 |
| Au | 16.12793224590815 | 22.14069990590195 | 7.85431533832268 |

|    |                   |                   |                   |
|----|-------------------|-------------------|-------------------|
| Au | 16.01349652061773 | 24.11402534682573 | 9.95679682115800  |
| Au | 18.17689047585333 | 22.20435943306787 | 9.80077197402502  |
| Au | 8.04884985161508  | 3.99939891657279  | 14.00000329525389 |
| Au | 9.96645446682560  | 3.91632322223123  | 11.95458771436260 |
| Au | 11.99113461089523 | 3.80655429912302  | 14.00001514868837 |
| Au | 14.00000031894963 | 3.81550188076982  | 12.00087883206978 |
| Au | 16.00893073873858 | 3.80657480280128  | 14.00001253221292 |
| Au | 18.03358029467573 | 3.91632559087996  | 11.95458124422864 |
| Au | 19.95115492771932 | 3.99940013471640  | 13.99999894189453 |
| Au | 3.99939560307918  | 8.04887814204820  | 14.00000803825849 |
| Au | 5.95873530346366  | 5.95876072548680  | 14.00000299534625 |
| Au | 5.84795649509269  | 7.84964128529348  | 11.85836570235854 |
| Au | 7.84965319695354  | 5.84797214822510  | 11.85837123910266 |
| Au | 9.92327480909903  | 7.90709339619487  | 11.91393824812747 |
| Au | 11.98543582257579 | 5.91865390574206  | 11.96590904984120 |
| Au | 14.00004913312911 | 7.94249942587191  | 11.94912951492593 |
| Au | 16.01463040590263 | 5.91865258986998  | 11.96592028833643 |
| Au | 18.07677048439323 | 7.90710402879859  | 11.91395495004211 |
| Au | 20.15032901907083 | 5.84796985100583  | 11.85838760856023 |
| Au | 22.04122291593412 | 5.95877765194541  | 13.99999569383452 |
| Au | 22.15197996953576 | 7.84967401153127  | 11.85838224011112 |
| Au | 24.00050245765855 | 8.04890761870085  | 13.99999605589311 |
| Au | 3.91633412546118  | 9.96643488111189  | 11.95455945468552 |
| Au | 3.80649694912266  | 11.99109224578268 | 14.00001067758629 |
| Au | 5.91862710196013  | 11.98540105258947 | 11.96592229743785 |
| Au | 7.90709792739438  | 9.92324447677527  | 11.91393514734329 |
| Au | 9.93897133720909  | 11.95943256699627 | 11.95035632266239 |
| Au | 11.95947294509059 | 9.93896094880659  | 11.95033649282784 |
| Au | 14.00004545597674 | 11.96596290839488 | 11.99061453839790 |
| Au | 16.04062507577017 | 9.93891723142884  | 11.95033940723341 |
| Au | 18.06109221862688 | 11.95941898499299 | 11.95032596048144 |
| Au | 20.09287400302041 | 9.92325148471603  | 11.91394303422875 |
| Au | 22.08122915036298 | 11.98540143703389 | 11.96591020675492 |
| Au | 24.08355906472253 | 9.96645444364581  | 11.95456599455952 |
| Au | 24.19321314652988 | 11.99109205008744 | 14.00001607358999 |
| Au | 3.81544104849979  | 14.00000503493663 | 12.00087250938028 |
| Au | 3.80648319419709  | 16.00890931968294 | 14.00001188190491 |
| Au | 5.91860951780537  | 16.01461819207242 | 11.96592399845240 |
| Au | 7.94249861859695  | 14.00001285009827 | 11.94913395564014 |
| Au | 9.93896143866018  | 16.04058568026499 | 11.95035467555040 |
| Au | 11.96600183800454 | 14.00000975642001 | 11.99063794641623 |
| Au | 14.00003887485522 | 16.03404863619408 | 11.99061529375795 |
| Au | 16.03407266306317 | 14.00000160240065 | 11.99058763391666 |
| Au | 18.06108518497639 | 16.04057801148601 | 11.95034100815542 |
| Au | 20.05746646459870 | 14.00000596759628 | 11.94913397662688 |
| Au | 22.08124497122104 | 16.01459870115452 | 11.96591593101668 |
| Au | 24.18428850884512 | 13.99999084844437 | 12.00086210871626 |
| Au | 24.19322763933978 | 16.00887984703422 | 14.00001677310754 |
| Au | 3.91630658636654  | 18.03358566267905 | 11.95457289895399 |
| Au | 3.99936622773171  | 19.95117343981472 | 14.00000068781184 |
| Au | 5.84793606362439  | 20.15038498610790 | 11.85834727918231 |
| Au | 7.90707700563981  | 18.07677556646798 | 11.91393673414362 |
| Au | 9.92325527103609  | 20.09292335609106 | 11.91393294008412 |
| Au | 11.95945735882368 | 18.06106728502292 | 11.95032517582427 |
| Au | 14.00004797464800 | 20.05749896271536 | 11.94912411321457 |
| Au | 16.04062162459395 | 18.06108758387739 | 11.95033860054795 |
| Au | 18.07677638823544 | 20.09288847637502 | 11.91395184465463 |
| Au | 20.09288684659800 | 18.07674260900338 | 11.91395275604186 |
| Au | 22.15199062433688 | 20.15032927088119 | 11.85838593740531 |
| Au | 24.08358059953866 | 18.03355233848724 | 11.95459537079650 |
| Au | 24.00052114580954 | 19.95112810149761 | 14.00000354389104 |
| Au | 5.95871847092921  | 22.04127277237341 | 13.99999671592400 |

|    |                   |                   |                   |
|----|-------------------|-------------------|-------------------|
| Au | 7.84962932170717  | 22.15204184894986 | 11.85834958751447 |
| Au | 8.04883700083009  | 24.00060376002187 | 13.99999936561689 |
| Au | 9.96644522057413  | 24.08366737330458 | 11.95457926509580 |
| Au | 11.98543196990712 | 22.08134734578342 | 11.96590265820815 |
| Au | 11.99114209638666 | 24.19342657874827 | 14.00000811018914 |
| Au | 14.00000464179551 | 24.18447257813897 | 12.00085391922044 |
| Au | 16.01463775574656 | 22.08133282022618 | 11.96590565519208 |
| Au | 16.00893108867910 | 24.19340212020066 | 14.00001147613991 |
| Au | 18.03359207170588 | 24.08365174979828 | 11.95458062060104 |
| Au | 20.15034136677940 | 22.15201811519348 | 11.85838256004501 |
| Au | 19.95115677305038 | 24.00058102471411 | 14.00000287864061 |
| Au | 22.04123281506885 | 22.04123747047955 | 14.00000208758948 |
| Au | 9.96644389865113  | 3.91631241213936  | 16.04542651231459 |
| Au | 11.98654896790292 | 3.88594250195367  | 18.04318501856275 |
| Au | 14.00000072219724 | 3.81549049522861  | 15.99915115514594 |
| Au | 16.01349135674937 | 3.88592658490972  | 18.04319130489307 |
| Au | 18.03359237996924 | 3.91630968931390  | 16.04542257585838 |
| Au | 5.84793971993059  | 7.84963387001892  | 16.14165310741872 |
| Au | 7.84964675907597  | 5.84795085246048  | 16.14164374935762 |
| Au | 7.79597395542353  | 7.79595438550443  | 18.20972415204593 |
| Au | 9.82313604329403  | 5.79561874984328  | 18.19921265009489 |
| Au | 9.92327174933000  | 7.90705901019789  | 16.08606250270415 |
| Au | 11.98540517674441 | 5.91863849179889  | 16.03409941252897 |
| Au | 14.00005087429472 | 7.94256842959038  | 16.05085733158426 |
| Au | 16.01466542000893 | 5.91863643243592  | 16.03408813849801 |
| Au | 18.17688743278931 | 5.79560351841340  | 18.19922253787231 |
| Au | 18.07677370606201 | 7.90706562944860  | 16.08604656542295 |
| Au | 20.15033993677991 | 5.84794604278489  | 16.14162061453917 |
| Au | 20.20401359559590 | 7.79595563648568  | 18.20974062594745 |
| Au | 22.15199808399037 | 7.84966145757486  | 16.14161783553215 |
| Au | 3.91632400064848  | 9.96643008856305  | 16.04545529099041 |
| Au | 3.88594798629534  | 11.98653192218502 | 18.04321885056019 |
| Au | 5.79562302511119  | 9.82310094713877  | 18.19922924056619 |
| Au | 5.91861347546970  | 11.98537047250790 | 16.03408386484968 |
| Au | 7.90706480388114  | 9.92324142768703  | 16.08606591466140 |
| Au | 9.93894470353419  | 11.95948270625217 | 16.04967997791050 |
| Au | 11.95952531151853 | 9.93893402678707  | 16.04969360074933 |
| Au | 14.00004232931225 | 11.96589757271239 | 16.00941108269618 |
| Au | 16.04057142568330 | 9.93889949477694  | 16.04967571436238 |
| Au | 18.06110885595959 | 11.95947228986982 | 16.04968656844713 |
| Au | 20.09290628963728 | 9.92324602249046  | 16.08605862105881 |
| Au | 22.20431981934233 | 9.82312337469779  | 18.19916254945705 |
| Au | 22.08123702430549 | 11.98536399882013 | 16.03410087287490 |
| Au | 24.08356392406210 | 9.96644020213895  | 16.04543562962538 |
| Au | 24.11393418365030 | 11.98651691275829 | 18.04321483570978 |
| Au | 3.81542936206880  | 14.00000321172963 | 15.99915372183291 |
| Au | 3.88594264647661  | 16.01348141773267 | 18.04320254790413 |
| Au | 5.91859535736746  | 16.01464780135159 | 16.03408419687249 |
| Au | 7.94257109185197  | 14.00001207151152 | 16.05085664054073 |
| Au | 9.93893087597835  | 16.04053348427779 | 16.04968150808488 |
| Au | 11.96593285393595 | 14.00000846169536 | 16.00939659273416 |
| Au | 14.00003994975497 | 16.03411782797289 | 16.00941773800833 |
| Au | 16.03413886270804 | 14.00000648466181 | 16.00943523436639 |
| Au | 18.06111173104415 | 16.04052965053230 | 16.04968378873149 |
| Au | 20.05738926177610 | 14.00000282943315 | 16.05085334032091 |
| Au | 22.08125169286011 | 16.01463147576597 | 16.03409530624819 |
| Au | 24.18429030344737 | 13.99999028171433 | 15.99917583394164 |
| Au | 24.11393916256881 | 16.01347207507810 | 18.04319687288985 |
| Au | 3.91629910376120  | 18.03359500468126 | 16.04543489743332 |
| Au | 5.79559630023216  | 18.17690084363600 | 18.19922741474032 |
| Au | 5.84791729634626  | 20.15039312991603 | 16.14166013417633 |
| Au | 7.90704073257773  | 18.07677643227936 | 16.08606300050707 |



|    |                   |                   |                   |
|----|-------------------|-------------------|-------------------|
| Au | 7.79594679531241  | 20.20405039936347 | 18.20973356335088 |
| Au | 9.92325135220721  | 20.09295525365872 | 16.08606724056663 |
| Au | 11.95951049045971 | 18.06108182046408 | 16.04969942183477 |
| Au | 14.00004824984458 | 20.05743003729505 | 16.05086310672239 |
| Au | 16.04057198925766 | 18.06110004858800 | 16.04968018099026 |
| Au | 18.07678116376355 | 20.09292124719595 | 16.08604962097193 |
| Au | 20.09291486855690 | 18.07674714206056 | 16.08604731664822 |
| Au | 20.20402045428931 | 20.20402012306071 | 18.20975323230268 |
| Au | 22.20432600448880 | 18.17687359766552 | 18.19923028344196 |
| Au | 22.15199767150010 | 20.15033096714216 | 16.14162604180576 |
| Au | 24.08358123993194 | 18.03355770046072 | 16.04541695238763 |
| Au | 7.84962215404516  | 22.15205805252995 | 16.14165576901932 |
| Au | 9.82311141014050  | 22.20438997847038 | 18.19922738034612 |
| Au | 9.96643365861626  | 24.08367789714524 | 16.04542362990402 |
| Au | 11.98540007298984 | 22.08136160579528 | 16.03409904659778 |
| Au | 11.98653768707918 | 24.11404015372133 | 18.04320058768709 |
| Au | 14.00000099969101 | 24.18448497395711 | 15.99916910173586 |
| Au | 16.01467015308114 | 22.08134817565452 | 16.03409922764673 |
| Au | 16.01350118605512 | 24.11404306062081 | 18.04321296812454 |
| Au | 18.17687621037333 | 22.20438119482117 | 18.19917090715541 |
| Au | 18.03360159406032 | 24.08365854917552 | 16.04543016415639 |
| Au | 20.15034546002505 | 22.15203111262702 | 16.14163049377528 |
| Au | 14.00001797112673 | 3.99749794687462  | 20.01892287705388 |
| Au | 9.83969432053867  | 7.82982508153502  | 20.17468498104776 |
| Au | 11.87213765645805 | 5.85927420054693  | 20.14566541831191 |
| Au | 11.82590615917667 | 7.80707263625900  | 22.20978808252866 |
| Au | 14.00001444947284 | 5.90375234578086  | 22.11092046985040 |
| Au | 14.00003011226520 | 7.93491394843522  | 20.09000833938194 |
| Au | 16.12790170713483 | 5.85925653640393  | 20.14566858734708 |
| Au | 16.17411827286574 | 7.80706407050853  | 22.20978200523852 |
| Au | 18.16032080218429 | 7.82981203541723  | 20.17467085607990 |
| Au | 5.85926728090048  | 11.87210021864185 | 20.14568265095122 |
| Au | 7.82983070893301  | 9.83966802319670  | 20.17468350025798 |
| Au | 7.80708507199103  | 11.82587106087818 | 22.20978829185284 |
| Au | 9.80653385769793  | 9.80649684599308  | 22.22540916557744 |
| Au | 9.92575201061644  | 11.92741159983093 | 20.12036987150193 |
| Au | 11.92745473444926 | 9.92573132112634  | 20.12038026987079 |
| Au | 14.00005122072277 | 11.97434929663889 | 20.06595607914309 |
| Au | 16.07259829117023 | 9.92572551354194  | 20.12038708628017 |
| Au | 18.19348218170412 | 9.80650987364974  | 22.22541064574920 |
| Au | 18.07427996292138 | 11.92742401231046 | 20.12037285335023 |
| Au | 20.17014400148786 | 9.83967615173346  | 20.17465909796457 |
| Au | 20.19288015580129 | 11.82588311480283 | 22.20978597049725 |
| Au | 22.14064669784642 | 11.87211062815032 | 20.14565163478824 |
| Au | 3.99751511759608  | 14.00000044585823 | 20.01893700447311 |
| Au | 5.90378962983788  | 13.99999668880389 | 22.11092022764866 |
| Au | 5.85926036340451  | 16.12789202212253 | 20.14568075524474 |
| Au | 7.93492317020379  | 13.99999787591667 | 20.09001890239411 |
| Au | 7.80708532718230  | 16.17411590996499 | 22.20978650292696 |
| Au | 11.82588905269925 | 7.80707590773881  | 5.79018402599161  |
| Au | 9.92574527175302  | 16.07259191900524 | 20.12036986443008 |
| Au | 11.97441331599786 | 14.00000445052275 | 20.06591820106209 |
| Au | 14.00005003182827 | 16.02566155853239 | 20.06596869770312 |
| Au | 16.02568293928003 | 14.00000368445762 | 20.06594966425833 |
| Au | 18.07428710504332 | 16.07257705336810 | 20.12037999183934 |
| Au | 20.06505929399374 | 13.99999686729651 | 20.08998683448493 |
| Au | 20.19288817454812 | 16.17410483671602 | 22.20979691468990 |
| Au | 22.09615322671920 | 13.99999208384456 | 22.11090616728788 |
| Au | 22.14065226144790 | 16.12787054242084 | 20.14565400450375 |
| Au | 24.00237350084525 | 13.99999339219105 | 20.01891645030934 |
| Au | 7.82981686805334  | 18.16033322034791 | 20.17468926775411 |
| Au | 9.80652954999146  | 18.19349528150008 | 22.22541828238845 |

|    |                   |                   |                   |
|----|-------------------|-------------------|-------------------|
| Au | 9.83967971174273  | 20.17017500437002 | 20.17469551859408 |
| Au | 11.92744961621798 | 18.07427501642839 | 20.12038840786625 |
| Au | 11.82590264985918 | 20.19291568005782 | 22.20980422792588 |
| Au | 14.00002831127077 | 20.06508499267765 | 20.09001923620397 |
| Au | 16.07260096757339 | 18.07427594485278 | 20.12040358535663 |
| Au | 16.17412015864994 | 20.19291837703970 | 22.20980876208947 |
| Au | 18.19348902034009 | 18.19347935257603 | 22.22543187552844 |
| Au | 18.16033241913263 | 20.17017759564376 | 20.17469218521120 |
| Au | 20.17015264681994 | 18.16031143237346 | 20.17467242266866 |
| Au | 11.87212232358900 | 22.14071918291771 | 20.14568579119072 |
| Au | 14.00001088540895 | 22.09621981905843 | 22.11094752782659 |
| Au | 14.00001781700603 | 24.00247293944325 | 20.01894820602530 |
| Au | 16.12790934161789 | 22.14071959572511 | 20.14569379792739 |
| Au | 14.00001720136517 | 8.02281229871252  | 23.98599331558904 |
| Au | 9.98466474817179  | 11.97686120098780 | 24.07404388237730 |
| Au | 11.97688534188378 | 9.98462733932486  | 24.07406359780524 |
| Au | 14.00003637162376 | 11.99236680200805 | 24.24272021304226 |
| Au | 16.02316094430909 | 9.98462220597625  | 24.07405598123036 |
| Au | 18.01535744103620 | 11.97683897542163 | 24.07405629801703 |
| Au | 8.02278893243611  | 13.99999409359437 | 23.98607530018791 |
| Au | 9.98465793196931  | 16.02312957589126 | 24.07405348733255 |
| Au | 11.99240353081179 | 13.99999605030205 | 24.24272716977903 |
| Au | 14.00003390173370 | 16.00762732250903 | 24.24273078516299 |
| Au | 16.00765703848496 | 13.99999606977409 | 24.24272188086157 |
| Au | 18.01536380558945 | 16.02314757814742 | 24.07407132307503 |
| Au | 19.97714314562088 | 13.99999122922577 | 23.98600899831341 |
| Au | 11.97687554764406 | 18.01536175941410 | 24.07408454854631 |
| Au | 14.00001404616310 | 19.97716868082393 | 23.98602715498526 |
| Au | 16.02316564630244 | 18.01536247832730 | 24.07408280568816 |

**Pt<sub>105</sub>Au<sub>300</sub>LEH-1510.764**

|    |                   |                   |                   |
|----|-------------------|-------------------|-------------------|
| Pt | 11.97580198187142 | 7.98416540860943  | 9.98970895889611  |
| Pt | 14.00884300716893 | 6.05690559785026  | 10.03180345398100 |
| Pt | 14.01348893854707 | 8.05796578568803  | 8.06997508116693  |
| Pt | 16.04603163584222 | 7.99142397389769  | 9.99378242891908  |
| Pt | 8.04654688307723  | 11.95731468779016 | 10.01801247734842 |
| Pt | 10.00774165342127 | 9.98252789497142  | 9.99961319557077  |
| Pt | 10.04597035456301 | 11.94133993952042 | 8.03945830428173  |
| Pt | 11.99685885826370 | 9.97485970438230  | 8.04185445955009  |
| Pt | 12.01590957433076 | 11.99950329176988 | 10.01827021615848 |
| Pt | 14.00539024351215 | 10.00532598632950 | 10.03067209859681 |
| Pt | 14.01365977845987 | 11.97810252660940 | 8.03730150450438  |
| Pt | 16.03966713038587 | 9.98565360853664  | 8.05151198406078  |
| Pt | 16.00526170279004 | 11.98598834450327 | 10.01655367455951 |
| Pt | 18.02634477814984 | 9.97342123220269  | 9.98925706325644  |
| Pt | 18.00873434277384 | 11.94836993900891 | 8.04891580177369  |
| Pt | 20.01015962695092 | 11.95439905001996 | 9.99121300205629  |
| Pt | 10.02462719165514 | 13.99099830304074 | 10.01874762338065 |
| Pt | 12.02749241785028 | 13.97138365507643 | 8.03087913956928  |
| Pt | 12.00000015367985 | 15.98924555754955 | 10.00390077930319 |
| Pt | 14.00555795223309 | 13.99756910518669 | 9.98891167244944  |
| Pt | 14.01252729506052 | 15.95322339305223 | 8.02012110538755  |
| Pt | 16.00296945416631 | 13.96463860841640 | 8.03930862590290  |
| Pt | 16.00365478581248 | 15.98580561522297 | 10.01629534483792 |
| Pt | 17.98667081497569 | 13.97933513157133 | 10.03826964771598 |
| Pt | 18.00677319667201 | 15.96322260361150 | 8.03901317050187  |
| Pt | 19.95970531872866 | 13.94630938087255 | 8.05743914964591  |
| Pt | 19.98492799733894 | 15.97395728382747 | 9.99444495406827  |
| Pt | 21.97216984790590 | 13.96650115519938 | 10.00295658767721 |
| Pt | 13.99651609140554 | 17.97375176088810 | 10.00509950274176 |
| Pt | 18.00609428848432 | 17.96670316597201 | 10.00634876316690 |
| Pt | 10.02205623013278 | 8.01935158545827  | 11.95200699175517 |

|                      |                   |                   |
|----------------------|-------------------|-------------------|
| Pt 12.01857984008221 | 6.02023597334241  | 11.97381568930190 |
| Pt 12.02018916846163 | 8.00599801748074  | 13.97804087320140 |
| Pt 14.00693469650631 | 5.98953857758183  | 13.93566297934101 |
| Pt 14.01015652882475 | 8.01102477792940  | 11.97604630070621 |
| Pt 15.99888350041241 | 6.02005716679210  | 11.97033106716917 |
| Pt 15.99866446165637 | 8.01346656735226  | 13.97204397735919 |
| Pt 18.00460398555211 | 8.02879241331805  | 11.94571682581214 |
| Pt 8.04956645068582  | 10.00110439123336 | 11.96333750531537 |
| Pt 8.03144645524930  | 11.98557002980506 | 13.98004964252979 |
| Pt 10.03800619672089 | 10.00225124517217 | 13.99310480138471 |
| Pt 10.03317291897288 | 12.00235376035258 | 12.01205393134764 |
| Pt 12.02120425603884 | 9.99613449073609  | 11.99598073567500 |
| Pt 12.03001098705820 | 12.00793928392465 | 13.97662663001189 |
| Pt 14.00469208352260 | 9.97823046955019  | 13.97512538790369 |
| Pt 13.99795513045692 | 11.98336748952781 | 11.98032568453770 |
| Pt 15.99402046563484 | 10.00115904543070 | 11.99377773272228 |
| Pt 15.97966748545915 | 11.99939547050633 | 13.97265499354333 |
| Pt 17.98297853048995 | 10.01581792682894 | 13.98491869186351 |
| Pt 17.98478537586377 | 11.99231742547037 | 11.99428362683294 |
| Pt 19.98161896197248 | 10.00858174645423 | 11.94331502024159 |
| Pt 19.98793512213565 | 11.99818441766371 | 13.97291010114433 |
| Pt 22.00311960989195 | 12.00131545322135 | 11.96617339567235 |
| Pt 8.02186377119985  | 13.97987679163886 | 11.99210811853083 |
| Pt 8.01756674499591  | 15.96161852074202 | 13.97534814054681 |
| Pt 9.99012389839114  | 13.99053106818015 | 13.97545853035130 |
| Pt 10.00135245364717 | 15.99309349862714 | 11.99104558726895 |
| Pt 12.02070853409381 | 13.99313856817042 | 11.99443128609727 |
| Pt 12.02680395927107 | 15.97540875707250 | 13.97141958744923 |
| Pt 14.01373971067269 | 13.98152315178461 | 13.95103023400882 |
| Pt 14.00850412239554 | 15.98830627994960 | 11.98762406731879 |
| Pt 15.98859923575626 | 13.96991838882886 | 11.98722202457338 |
| Pt 15.99196950340292 | 15.96837343886895 | 13.96406894397406 |
| Pt 18.00914802054303 | 13.98758190677334 | 13.96727110619311 |
| Pt 18.00699963516621 | 15.98066528414761 | 12.00050528771808 |
| Pt 20.00747255700240 | 13.96846817317600 | 11.98373156186182 |
| Pt 19.98928523824689 | 15.95522582622054 | 13.97402378919653 |
| Pt 22.04314175702816 | 13.95619211676899 | 13.96127084389707 |
| Pt 10.01754080381592 | 17.97765055449226 | 13.98451080042295 |
| Pt 12.01196958799532 | 17.99769491585866 | 11.99699016669853 |
| Pt 12.02233037170401 | 19.98343687231400 | 13.98693573739204 |
| Pt 14.01611204203218 | 18.01973457647567 | 13.96592731888325 |
| Pt 14.01251700561471 | 19.99368249693314 | 11.99516176235687 |
| Pt 16.00024532492260 | 18.00295510414281 | 11.98841727976778 |
| Pt 15.99862474095800 | 19.98484127531736 | 13.97960366270534 |
| Pt 17.99450381733044 | 17.96224768694341 | 13.98876226587926 |
| Pt 14.01027489047493 | 8.01246747970069  | 15.96334554678963 |
| Pt 10.02221476178610 | 11.99636101051289 | 15.97075631146631 |
| Pt 12.01677479753299 | 10.00551875682927 | 15.97190553140271 |
| Pt 12.02761707325752 | 12.00214602798130 | 17.97863859633383 |
| Pt 14.01223694969305 | 10.00598428239300 | 17.96425056659226 |
| Pt 14.00669073457766 | 12.00698292938404 | 15.96666163675462 |
| Pt 16.00154922586962 | 10.00215998892368 | 15.96824571235507 |
| Pt 15.99114530705031 | 11.99964007250472 | 17.97990240072439 |
| Pt 17.99284066548806 | 12.00085502437941 | 15.96249724494094 |
| Pt 8.02419763654414  | 13.97020971927631 | 15.95682232832295 |
| Pt 10.02729051982195 | 13.98426838013614 | 17.96385457033261 |
| Pt 10.02647897558741 | 15.96673635156040 | 15.96104740842366 |
| Pt 12.03332305931695 | 13.99359620855270 | 15.95950325182763 |
| Pt 12.03412009140906 | 15.96173800035740 | 17.96798447681789 |
| Pt 14.00847013786410 | 13.98166536511596 | 18.02426802075546 |
| Pt 14.01851541401363 | 15.96767154388363 | 15.95642908537100 |
| Pt 15.98059926600520 | 13.98099870279083 | 15.95781383027845 |

|    |                   |                   |                   |
|----|-------------------|-------------------|-------------------|
| Pt | 15.98620968801369 | 15.96071981753332 | 17.97933519812860 |
| Pt | 17.98832963837571 | 13.97823599274344 | 17.96509988632084 |
| Pt | 17.97786009887476 | 15.96663681281159 | 15.97051774255941 |
| Pt | 19.98547044881241 | 13.97432949931098 | 15.95964679128446 |
| Pt | 12.03213203608372 | 17.96745696287292 | 15.95675299275257 |
| Pt | 14.00796339778832 | 17.97054177356517 | 17.96459645888556 |
| Pt | 14.01169403601314 | 19.97851068659283 | 15.96646520297014 |
| Pt | 15.98834232127836 | 17.97908412431494 | 15.95835998174186 |
| Pt | 14.00821636132950 | 11.99330433559628 | 19.98717366485682 |
| Pt | 12.01448003281170 | 13.98386904655056 | 19.98048221512092 |
| Pt | 14.01267247796254 | 15.97945155994867 | 19.97705143032289 |
| Pt | 15.99740185779585 | 13.98195222935482 | 19.98811119266137 |
| Au | 11.87843504564870 | 7.92208402223879  | 5.88762074207767  |
| Au | 13.99915172408875 | 6.04761473644152  | 6.00001805119452  |
| Au | 14.00053527761686 | 8.03043717315779  | 3.96092689344791  |
| Au | 16.12731098523140 | 7.91041032718621  | 5.88816877964925  |
| Au | 7.82294544694474  | 11.80607712201016 | 5.80844034165274  |
| Au | 9.87428026351381  | 9.88843382879422  | 5.87812342825628  |
| Au | 9.96493482217787  | 11.94015871220743 | 3.86199779080148  |
| Au | 11.95694015492918 | 9.96927996017393  | 3.86101437667396  |
| Au | 11.99778102571541 | 11.94634815089010 | 5.94444506787995  |
| Au | 14.01631668392117 | 9.96892094002648  | 5.99263544708246  |
| Au | 14.00912983998240 | 11.96460890437773 | 3.73956286714188  |
| Au | 16.04944712849825 | 9.96259700858285  | 3.86486949690783  |
| Au | 16.03957883359870 | 11.95076455949846 | 5.95436996231970  |
| Au | 18.12872346808684 | 9.86922135215852  | 5.86551449244819  |
| Au | 18.03937079863324 | 11.94625722653738 | 3.86481625502446  |
| Au | 20.09767504082451 | 11.86274267488621 | 5.87622408774453  |
| Au | 5.96101431434016  | 13.99046620367874 | 5.95802112811945  |
| Au | 8.01848553029234  | 13.98775324070718 | 4.00448709976790  |
| Au | 7.80495877180398  | 16.17968187361202 | 5.80181363197795  |
| Au | 10.00012930056103 | 13.93034763148048 | 5.97772987135844  |
| Au | 9.98038071403577  | 16.01147195944528 | 3.92263789964741  |
| Au | 12.01334915403982 | 13.96395976465715 | 3.72075143864524  |
| Au | 12.01213412312055 | 15.95162159013091 | 5.91947609272143  |
| Au | 14.02355394327163 | 13.95157813396791 | 5.89621424418511  |
| Au | 14.02812605558249 | 15.97500169811521 | 3.73236783947476  |
| Au | 16.01849792993480 | 13.96469645535503 | 3.72673761180450  |
| Au | 16.04432379629119 | 15.96551944727327 | 5.94081069574029  |
| Au | 18.02725364377226 | 13.96108386170658 | 5.99053749648912  |
| Au | 18.01856055045561 | 16.02600439813787 | 3.87161357920829  |
| Au | 19.97217285628525 | 13.99680517396691 | 3.96023763342275  |
| Au | 20.05738087663169 | 16.09544910825305 | 5.92603643304458  |
| Au | 21.96378704978030 | 13.99725964641430 | 5.99298534639884  |
| Au | 9.81561341593367  | 18.17812886503341 | 5.80960819129411  |
| Au | 11.96454458058507 | 18.01008999795028 | 3.91855353100623  |
| Au | 11.77364115279180 | 20.22223891027373 | 5.76773026620673  |
| Au | 14.02663868295894 | 17.96215294847012 | 5.96301161157697  |
| Au | 14.00209699850224 | 19.96638906533588 | 4.03407933090951  |
| Au | 16.05817705370414 | 18.03109993110815 | 3.89894152675771  |
| Au | 16.24976774347321 | 20.24267642753211 | 5.75270590432809  |
| Au | 18.14889686510677 | 18.15483185887242 | 5.84132568020828  |
| Au | 14.00690849025389 | 22.03628936213040 | 5.95864656797046  |
| Au | 11.96929258873458 | 3.98480208855640  | 9.99593197684933  |
| Au | 14.00037326752866 | 4.05822025078550  | 8.06957462874053  |
| Au | 16.03072173759737 | 3.97539005541634  | 9.99821104684115  |
| Au | 7.89034023188682  | 7.91659464471206  | 9.92913730392588  |
| Au | 9.87115315140255  | 5.91761987763096  | 9.90802129109643  |
| Au | 9.89022821742957  | 7.92526714630108  | 7.90581526573041  |
| Au | 11.90763955369816 | 5.95693687054909  | 7.91539185084039  |
| Au | 16.09656909240682 | 5.94623813539696  | 7.91648795225694  |
| Au | 18.12965050288646 | 5.90630768273044  | 9.90997341532812  |

|    |                   |                   |                   |
|----|-------------------|-------------------|-------------------|
| Au | 18.11864623379813 | 7.89966098968344  | 7.89582004427538  |
| Au | 20.12661244369999 | 7.87583865156267  | 9.91036178491014  |
| Au | 3.84573819939123  | 11.93714310532160 | 9.95643413862494  |
| Au | 5.86303235504033  | 9.87477051092958  | 9.87367864695516  |
| Au | 5.80684900997317  | 11.80952058568026 | 7.82819920718017  |
| Au | 7.90543519505545  | 9.94046449912287  | 7.91714595633388  |
| Au | 20.10793012771600 | 9.87691588531677  | 7.88980470387747  |
| Au | 22.10030265403963 | 9.86813652237742  | 9.89986226601451  |
| Au | 22.07501640009540 | 11.88145635638141 | 7.89347149071340  |
| Au | 24.03988944790425 | 11.96032774141781 | 9.97711572328538  |
| Au | 4.00098519630746  | 13.98589757452464 | 8.00828901387638  |
| Au | 3.91029016895386  | 16.02795841387439 | 9.95763522934641  |
| Au | 5.96811629443732  | 13.94491603061632 | 9.97992130201666  |
| Au | 5.80014442201817  | 16.18585245588511 | 7.79344032779377  |
| Au | 7.97950566617066  | 13.90080493653988 | 7.96968095950938  |
| Au | 7.92504816578939  | 16.02357651326626 | 9.92962797737879  |
| Au | 9.94766406750366  | 16.01447613593526 | 7.92594872002266  |
| Au | 22.02770728019757 | 16.07178376669538 | 7.95579745977127  |
| Au | 23.95787685270028 | 13.99223510494994 | 8.05002945712783  |
| Au | 24.07668844137291 | 16.02922803107379 | 9.97589282596350  |
| Au | 5.78842817293265  | 18.20232496174957 | 9.79120757351988  |
| Au | 7.80697673511855  | 18.17765358306977 | 7.80616132944413  |
| Au | 7.79917741519066  | 20.19852851633714 | 9.80952010728683  |
| Au | 9.94653964940956  | 18.04771483155624 | 9.93927853993012  |
| Au | 9.81705597285864  | 20.19114850538576 | 7.80344801310564  |
| Au | 11.96849982657518 | 18.03399795858848 | 7.92472106328547  |
| Au | 11.96679841861153 | 20.06866072192811 | 9.93373967848378  |
| Au | 14.02639970595652 | 20.03089258911583 | 7.93577280824038  |
| Au | 16.06910372557212 | 18.02089013557655 | 7.95165834098759  |
| Au | 16.06648169027268 | 20.05863038960963 | 9.93446762804352  |
| Au | 18.15425667388229 | 20.18218583190148 | 7.83808636557221  |
| Au | 20.03453092932855 | 18.07945321213570 | 7.95712841515347  |
| Au | 20.15804687262670 | 20.18549872081759 | 9.84407304564980  |
| Au | 22.15540342720255 | 18.17038603215167 | 9.85054897531660  |
| Au | 9.79719030925708  | 22.20800007879053 | 9.79406839870028  |
| Au | 11.78234442368659 | 22.21837147288997 | 7.77439387331088  |
| Au | 11.95520899272227 | 24.10159612804090 | 9.95680732934706  |
| Au | 14.01724725201957 | 22.04491422618095 | 9.98975657679997  |
| Au | 14.00675535317259 | 23.98304386090582 | 8.01338870741910  |
| Au | 16.24333765811592 | 22.25180672813156 | 7.75545190356013  |
| Au | 16.05597671275723 | 24.12074320729224 | 9.95556435754384  |
| Au | 18.21115233294653 | 22.24274675582618 | 9.78781667957188  |
| Au | 8.01573958973706  | 4.00213833162111  | 13.98296836435078 |
| Au | 9.98327922035120  | 3.92242496370082  | 11.94794499394589 |
| Au | 12.03198979885552 | 3.82067347906302  | 13.93931977511247 |
| Au | 14.00119677019737 | 3.87092971815905  | 11.96341956924970 |
| Au | 15.97414924678277 | 3.82302989173796  | 13.93635571323898 |
| Au | 18.01955709711751 | 3.91399073332173  | 11.95048787295982 |
| Au | 19.98796820534836 | 3.99543156801155  | 13.98307982578532 |
| Au | 3.99994460510226  | 8.00566737958304  | 13.99108711200002 |
| Au | 5.95189921040068  | 5.95214075722008  | 13.99461302391482 |
| Au | 5.79450656763702  | 7.82297866061604  | 11.80351919478869 |
| Au | 7.78542687738529  | 5.80088953172362  | 11.79556481110727 |
| Au | 7.97046498470713  | 7.95507597591068  | 13.91153232581492 |
| Au | 9.99954755043024  | 5.97553905751863  | 13.93349486641746 |
| Au | 18.01481239409635 | 5.98186082514331  | 13.92435589757400 |
| Au | 20.22146052672154 | 5.77848801503786  | 11.79121831767048 |
| Au | 20.04181225875728 | 7.96357088792701  | 13.90267607219254 |
| Au | 22.05163791107914 | 5.94789779243315  | 13.98931559401585 |
| Au | 22.22143686007893 | 7.77883650592677  | 11.78897681636296 |
| Au | 23.99956702057931 | 8.01189111549743  | 13.98519746065378 |
| Au | 3.84493358233652  | 9.95492616360845  | 11.93949782768203 |

|    |                   |                   |                   |
|----|-------------------|-------------------|-------------------|
| Au | 3.69372409463810  | 11.97731371121814 | 13.97375399294141 |
| Au | 5.97346990522837  | 9.97043804581181  | 13.94240252051924 |
| Au | 5.93208387437979  | 11.95297728444219 | 11.95841355272179 |
| Au | 22.02097089215798 | 9.98914757266173  | 13.93149935831140 |
| Au | 24.07885719158240 | 9.98030677100563  | 11.95007021580623 |
| Au | 24.19625220475972 | 12.00864179993792 | 13.95266572824496 |
| Au | 3.69208187695079  | 13.97374776183925 | 11.98373487754460 |
| Au | 3.68092441191323  | 15.98778178773856 | 13.98439509971955 |
| Au | 5.87547322605517  | 13.96468654831181 | 13.96661943839577 |
| Au | 5.90388307397269  | 15.97283934294459 | 11.98443040444406 |
| Au | 22.05993990423549 | 15.98790793202239 | 11.97072905532554 |
| Au | 24.15975706725279 | 13.97443232010347 | 11.96493622741113 |
| Au | 24.23362560234008 | 15.96167595087289 | 13.95749655440226 |
| Au | 3.89963067162364  | 18.03066496933873 | 11.94302318396517 |
| Au | 4.02011479584816  | 19.97809068764413 | 13.99703561525810 |
| Au | 5.94746314262428  | 17.98233072411900 | 13.98897047965825 |
| Au | 5.76065914229439  | 20.23231940123510 | 11.76293713611407 |
| Au | 7.92717313909078  | 18.04362760270361 | 11.95098686837962 |
| Au | 7.94077469140227  | 20.05171502516254 | 13.99140680537018 |
| Au | 9.94791420089905  | 20.06982187218571 | 11.95207675978189 |
| Au | 18.06200973064686 | 20.05455182074493 | 11.93656665157717 |
| Au | 20.05885179908019 | 18.03784362534006 | 11.93587800674386 |
| Au | 20.06418168650676 | 20.04525308702542 | 13.97604613094855 |
| Au | 22.04782532142690 | 17.99725841917836 | 13.97065982026919 |
| Au | 22.25130635869634 | 20.25600788667584 | 11.75197022950308 |
| Au | 24.11171611151901 | 18.04660352493118 | 11.93945218061241 |
| Au | 23.98547912393263 | 19.98321233832672 | 13.99533009243306 |
| Au | 5.95617834139667  | 22.04155457102438 | 14.00183659431020 |
| Au | 7.76724360642267  | 22.23395240664327 | 11.76552448849829 |
| Au | 8.01633860989195  | 23.97912545028282 | 13.99751132530916 |
| Au | 10.00599961757139 | 22.05065952047303 | 13.99550451929565 |
| Au | 9.96393524767959  | 24.10405268618209 | 11.94735893113471 |
| Au | 12.01086658910076 | 22.09948306701880 | 11.99410878093367 |
| Au | 12.00011431637814 | 24.33513505077502 | 13.99242343552929 |
| Au | 14.00792115153244 | 22.13852709476113 | 13.98458297020001 |
| Au | 14.00485450717992 | 24.33378306518719 | 11.99119125835235 |
| Au | 16.01254815328481 | 22.10372589514693 | 11.98771260997490 |
| Au | 16.01144011399242 | 24.33599881333633 | 13.99006841660626 |
| Au | 18.01305078998310 | 22.04428119578292 | 13.97749487954875 |
| Au | 18.04313427618276 | 24.12395085735686 | 11.94728030279819 |
| Au | 20.24153175776410 | 22.25167845783092 | 11.75752771063190 |
| Au | 19.99003196732463 | 23.98469107006368 | 13.99552716553181 |
| Au | 22.04717048019273 | 22.04441878806325 | 13.99646292683323 |
| Au | 9.98930225332496  | 3.91594805766183  | 16.00600173305602 |
| Au | 11.96399292352620 | 3.89717842879828  | 18.01781270980161 |
| Au | 14.00761229306606 | 3.75999943602277  | 15.95195329712909 |
| Au | 16.04473704018132 | 3.89923649355304  | 18.02054298094523 |
| Au | 18.01584977737720 | 3.91914658870651  | 16.00508456899962 |
| Au | 5.79730646465055  | 7.78211965490353  | 16.19524550593470 |
| Au | 7.81981133528423  | 5.80821163918249  | 16.16766191294628 |
| Au | 7.81163975119381  | 7.80171580543083  | 18.17830479916192 |
| Au | 9.83667567360562  | 5.81465521239575  | 18.16488576463005 |
| Au | 9.95487765342544  | 7.92109858209801  | 16.01970993426321 |
| Au | 12.03133599736471 | 5.91705614021428  | 15.96387001557518 |
| Au | 11.97503742302132 | 7.93315114343704  | 18.03705785650434 |
| Au | 14.00584081295580 | 5.95025965143708  | 18.00565099306460 |
| Au | 15.98269525110850 | 5.92072150913072  | 15.96077388039866 |
| Au | 16.04119294308461 | 7.93052994444835  | 18.03809060872723 |
| Au | 18.17624088921255 | 5.80822997403778  | 18.17605875126174 |
| Au | 18.05760694801739 | 7.92621899994830  | 16.01571638955896 |
| Au | 20.17638213246158 | 5.81953233159023  | 16.15900924421953 |
| Au | 20.18911993781773 | 7.80826294255805  | 18.17808724345095 |

Au 22.18260958825586 7.81417025844683 16.16725691336521  
 Au 3.91499127292078 9.95477535555219 16.02354461206576  
 Au 3.90719711550233 11.94457288901637 18.02276627676648  
 Au 5.80083878167882 9.79550714813197 18.18987243105251  
 Au 5.91245653800804 11.97860930645256 15.96941987398044  
 Au 7.93812883294509 9.92746295961425 16.01703207133856  
 Au 7.93862253374784 11.95147056553131 18.03240047181984  
 Au 9.96155178220589 9.94597311022493 18.03637657345332  
 Au 18.04917386357261 9.94688014219509 18.03601759732295  
 Au 20.06826067950951 9.94108471613786 16.01522875501974  
 Au 20.06648527209462 11.95594250267846 18.04066343403278  
 Au 22.19024155812816 9.81612430297405 18.18136522299121  
 Au 22.08398340650473 11.99766376235447 15.98243994093630  
 Au 24.08664226850904 9.96925779054256 16.01835842160837  
 Au 24.10395397249254 11.94768456187120 18.03261569032474  
 Au 3.68072426745322 13.98405882554332 15.98060239907850  
 Au 3.89804537285127 16.03750422262871 18.01893836111330  
 Au 5.94883561755155 13.98504318418647 17.97871814415162  
 Au 5.90924394130377 15.97238057310252 15.97368952144671  
 Au 7.94150762568540 16.01403360899588 18.02366431298774  
 Au 20.06283922790051 16.01329534317781 18.02751848237048  
 Au 22.05251195881412 13.99101895836685 18.00692088357176  
 Au 22.08557169525994 15.95535158269474 15.95555105911063  
 Au 24.25004855211335 13.98012069090639 15.96011191337449  
 Au 24.10056993096462 16.03464549179943 18.01891894583817  
 Au 3.89766367136612 18.02324518192591 16.04070499456039  
 Au 5.80494748958763 18.18209457298613 18.17978603772072  
 Au 5.76904017528999 20.22726285617635 16.22548303186687  
 Au 7.93891735759083 18.03163978786708 16.01754413436620  
 Au 7.81598234948542 20.18107379204722 18.16717794236880  
 Au 9.96626040777362 18.02573757638078 18.02320071376246  
 Au 9.95753124671116 20.05720500145137 16.02114708793583  
 Au 11.97442603928366 20.05403368709283 18.02750023258843  
 Au 16.04108629562417 20.05811110302366 18.03367819098732  
 Au 18.04280657359366 18.02505229924477 18.02777114833738  
 Au 18.05778220367019 20.05546234987566 16.01814500271853  
 Au 20.06876347603148 18.02603769537000 16.01438889152878  
 Au 20.19043517821593 20.18025856997613 18.17215980986132  
 Au 22.18288492727181 18.16235487243414 18.16576631101079  
 Au 22.22489818293029 20.21572269117367 16.21373198021914  
 Au 24.09369850956686 18.01350978999910 16.02821166905161  
 Au 7.76414486475758 22.23356936492418 16.23036842723219  
 Au 9.81003727673094 22.19648023612229 18.18586266687067  
 Au 9.96626392342438 24.10383347885370 16.04607235252343  
 Au 12.01234225243295 22.09537394459403 15.98490242666453  
 Au 11.95584486975392 24.10484713732350 18.02602766895428  
 Au 14.00319499708375 22.04912831762166 17.98774755526304  
 Au 14.00392184597988 24.33466153121607 15.98736785108614  
 Au 16.00249067470306 22.09236149655064 15.97959172767214  
 Au 16.04901156505642 24.09548266785315 18.02559005296744  
 Au 18.19944501256489 22.19526616859289 18.18904240640432  
 Au 18.04168865272840 24.09412146586048 16.03899804856475  
 Au 20.23463503098313 22.22325985460569 16.22237782752185  
 Au 13.99954802755814 4.00834045985784 19.98573548013958  
 Au 9.82050522954136 7.79966611089017 20.19026132435122  
 Au 11.77410962860748 5.76197464661483 20.22849904160725  
 Au 11.76653907046470 7.75813846600592 22.23606461303342  
 Au 14.00199418049084 5.95085144620093 22.04231422783858  
 Au 14.00667153763890 7.94333200081581 20.05710182107694  
 Au 16.23361052243868 5.76057782088336 20.23088091173601  
 Au 16.23890163644353 7.75896449868947 22.24050050547565  
 Au 18.18919165247751 7.79525503857641 20.19842293519130

|    |                   |                   |                   |
|----|-------------------|-------------------|-------------------|
| Au | 5.78001086133738  | 11.76924649208535 | 20.22108162226718 |
| Au | 7.81320767882327  | 9.81265382858463  | 20.18892417901176 |
| Au | 7.77125118016441  | 11.76594467379478 | 22.23191525750130 |
| Au | 9.79937348599036  | 9.79049568739266  | 22.20957507997917 |
| Au | 9.95246066535320  | 11.95274781960807 | 20.06306522536681 |
| Au | 11.96846310143611 | 9.94269416265519  | 20.06454064916415 |
| Au | 12.00393589855830 | 11.99761808172295 | 22.10073883128705 |
| Au | 14.00445404749489 | 9.99697867276055  | 22.05748442673461 |
| Au | 16.04649710796830 | 9.94020855669123  | 20.06751748628997 |
| Au | 16.00533572183349 | 11.99318199000286 | 22.10588315531488 |
| Au | 18.20502090990919 | 9.79216112017696  | 22.20979613507443 |
| Au | 18.05724503395944 | 11.95302749326985 | 20.06456353421996 |
| Au | 20.19827863137802 | 9.81068551847866  | 20.19685635663090 |
| Au | 20.23488362218971 | 11.76244582259323 | 22.24017185249429 |
| Au | 22.23184725769244 | 11.76941430138767 | 20.23100413564667 |
| Au | 4.02124843804892  | 13.99505207150627 | 19.97871752072946 |
| Au | 5.95644165430183  | 13.99703381313854 | 22.04051608758419 |
| Au | 5.77844805698758  | 16.21845178262787 | 20.21764267122225 |
| Au | 7.94610822143732  | 13.98875427917661 | 20.04466397595253 |
| Au | 7.77088258277143  | 16.22486527442550 | 22.22599680038236 |
| Au | 10.00271934538004 | 13.99399471219042 | 22.05149745980216 |
| Au | 9.95806815027642  | 16.01929664605141 | 20.05326567354228 |
| Au | 12.01139266706583 | 15.98584349191699 | 22.09147720128605 |
| Au | 14.00378978127787 | 13.98928204375600 | 22.12836612618195 |
| Au | 15.99740671191703 | 15.98852020723405 | 22.09873609075675 |
| Au | 18.00422788303087 | 13.99317589012804 | 22.05733379754782 |
| Au | 18.05133096666388 | 16.02164071805971 | 20.05898280069752 |
| Au | 20.05874386997737 | 13.99097800471237 | 20.05857545686414 |
| Au | 20.23814250836314 | 16.22922482828334 | 22.23645263950209 |
| Au | 22.05011434596457 | 13.99781063337019 | 22.04959155220494 |
| Au | 22.22490541184434 | 16.21528736226970 | 20.22179633051740 |
| Au | 23.99040592646121 | 13.99708926723006 | 19.99028306878910 |
| Au | 7.82382807236961  | 18.16273895033128 | 20.17013944658247 |
| Au | 9.81140616584136  | 18.18754951597432 | 22.18999527064270 |
| Au | 9.83197353698704  | 20.17548291305324 | 20.17230298991242 |
| Au | 11.97341066329106 | 18.03465718574283 | 20.05134727548981 |
| Au | 11.77227972179057 | 20.22513775561902 | 22.22458345517903 |
| Au | 14.00270497791811 | 17.99184761256718 | 22.04991554088720 |
| Au | 14.00384499736029 | 20.04845787007171 | 20.04624558585404 |
| Au | 16.04202471049662 | 18.03997962899968 | 20.06089201405818 |
| Au | 16.23041078414828 | 20.22450986398339 | 22.22836014302777 |
| Au | 18.20320534283783 | 18.19490579620648 | 22.20402955157019 |
| Au | 18.17916975581925 | 20.17858977198383 | 20.18200695909152 |
| Au | 20.18801886224215 | 18.16934218918686 | 20.18188117653679 |
| Au | 11.77467909168559 | 22.22308890985620 | 20.22168295068599 |
| Au | 13.99979622323751 | 22.04183319643189 | 22.04054150868429 |
| Au | 14.00259763464216 | 23.97798383443319 | 19.98188716744366 |
| Au | 16.22705192254531 | 22.21698277745734 | 20.22141988820165 |
| Au | 14.00214966583029 | 8.01149597200679  | 23.98025989408417 |
| Au | 9.96313732670812  | 11.94322788905599 | 24.10953542463100 |
| Au | 11.94904052640025 | 9.95544339712467  | 24.10798646645994 |
| Au | 14.00330760782135 | 11.99233527954427 | 24.32977383290587 |
| Au | 16.05899268752942 | 9.95301552891302  | 24.11486547763024 |
| Au | 18.04517725027371 | 11.94172102450992 | 24.11550827349705 |
| Au | 8.01814144628889  | 13.99649431859577 | 23.98085889051733 |
| Au | 9.96631083264284  | 16.04603983167435 | 24.10032409322999 |
| Au | 12.00023155026276 | 13.99315245539619 | 24.33372294981098 |
| Au | 14.00150578640489 | 15.99089688753965 | 24.33367058742218 |
| Au | 16.00751851470985 | 13.99224303478095 | 24.33166198394566 |
| Au | 18.04071916259852 | 16.04734343597416 | 24.10515314388831 |
| Au | 19.98935079856450 | 13.99701115905454 | 23.98523121993174 |
| Au | 11.95344773007843 | 18.02930197764841 | 24.10238953714859 |



Au 14.00111039022448 19.97836817210753 23.97875286299568  
Au 16.05259197309847 18.03231647211823 24.10697482495542

**Pt<sub>43</sub>Au<sub>158</sub>L<sub>1</sub>-706.178**

Pt 8.53006331236053 12.50000000000000 16.46991168763954  
Pt 12.50000000000000 14.49818000409735 14.49820500409729  
Pt 10.43489807212588 18.50810961188962 12.44335099160381  
Pt 12.50000000000000 10.50181999590265 10.50181999590265  
Pt 12.50000000000000 8.53008831236046 8.53008831236046  
Pt 14.56510192787412 6.49189038811038 12.55662400839626  
Pt 14.59307746110703 10.40694753889291 16.55703896579919  
Pt 18.50808461188951 12.44335099160381 14.56510192787412  
Pt 8.44852941045566 12.59166680363215 8.44852941045566  
Pt 10.40692253889297 16.55706396579912 10.40694753889291  
Pt 12.59169180363209 8.44855441045560 16.55144558954440  
Pt 8.53006331236053 8.53008831236046 12.50000000000000  
Pt 14.59307746110703 8.44293603420088 14.59307746110703  
Pt 14.56510192787412 12.44335099160381 18.50810961188962  
Pt 10.43489807212588 12.55664900839619 6.49191538811049  
Pt 10.45704401397707 14.54293098602299 16.47296285858690  
Pt 12.40833319636785 16.55144558954440 8.44852941045566  
Pt 8.44293603420088 14.59305246110709 10.40694753889291  
Pt 8.52703714141310 10.45706901397701 14.54295598602293  
Pt 16.55706396579912 10.40694753889291 14.59307746110703  
Pt 12.50000000000000 16.46991168763954 16.46991168763954  
Pt 12.55664900839619 6.49189038811038 14.56510192787412  
Pt 14.49820500409729 12.50000000000000 10.50181999590265  
Pt 18.50808461188951 10.43489807212588 12.55662400839626  
Pt 14.54295598602293 16.47296285858690 14.54295598602293  
Pt 6.49191538811049 12.55664900839619 10.43489807212588  
Pt 10.50179499590271 10.50181999590265 12.50000000000000  
Pt 16.46991168763954 12.50000000000000 8.53008831236046  
Pt 6.49191538811049 14.56510192787412 12.44335099160381  
Pt 10.50179499590271 12.50000000000000 14.49820500409729  
Pt 14.49820500409729 14.49818000409735 12.50000000000000  
Pt 10.45704401397707 8.52703714141310 10.45704401397707  
Pt 16.55147058954434 12.40833319636785 16.55144558954440  
Pt 12.44337599160374 18.50810961188962 10.43489807212588  
Pt 8.44852941045566 16.55144558954440 12.40830819636791  
Pt 16.47296285858690 14.54293098602299 10.45704401397707  
Pt 12.44337599160374 14.56510192787412 6.49191538811049  
Pt 10.40692253889297 14.59305246110709 8.44293603420088  
Pt 12.50000000000000 12.50000000000000 12.50000000000000  
Pt 16.46991168763954 16.46991168763954 12.50000000000000  
Pt 12.55664900839619 10.43489807212588 18.50810961188962  
Pt 16.55147058954434 8.44855441045560 12.59166680363215  
Pt 14.54295598602293 10.45706901397701 8.52703714141310  
Au 20.50131465524583 8.50000684645327 12.51535404182462  
Au 16.50734188113336 12.49337501004195 4.46268100509872  
Au 10.47295881556192 4.38241575984737 10.47295881556192  
Au 10.43674664308582 10.40961700716299 16.58498871268961  
Au 12.51887047551428 12.48115452448584 16.55343423188533  
Au 18.69611537196558 16.68474025758453 14.69164907788709  
Au 10.32830963190445 18.66250109439438 8.32927723937882  
Au 14.54422015957171 12.49333327832183 14.54422015957171  
Au 10.45577984042829 14.54419515957177 12.49330827832189  
Au 18.62517359583311 14.61076250682982 16.64708663325989  
Au 10.45254125615660 6.47911998523600 12.49562650769800  
Au 10.40959200716287 16.58501371268954 14.56325335691417  
Au 14.67166536809561 6.33749890560562 16.67072276062118  
Au 16.50734188113336 20.53731899490128 12.50662498995805  
Au 8.23556670184811 8.26031061767481 8.23559170184805

|    |                   |                   |                   |
|----|-------------------|-------------------|-------------------|
| Au | 10.39097343373143 | 6.43168952478774  | 8.40712530111567  |
| Au | 16.70232168824199 | 8.29767831175801  | 16.70229668824206 |
| Au | 12.46798753900969 | 18.56575302949430 | 6.43427197050581  |
| Au | 16.55345923188545 | 12.48115452448584 | 12.51884547551416 |
| Au | 10.30835092211291 | 18.69614037196552 | 16.68471525758441 |
| Au | 16.64711163325983 | 14.61076250682982 | 18.62517359583311 |
| Au | 14.60902656626857 | 8.40712530111567  | 6.43171452478768  |
| Au | 18.49255786830248 | 12.50000000000000 | 6.50744213169751  |
| Au | 20.53731899490128 | 12.50662498995805 | 8.49268311886675  |
| Au | 12.51537904182474 | 4.49868534475417  | 16.49996815354680 |
| Au | 10.39097343373143 | 16.59287469888433 | 18.56828547521232 |
| Au | 16.76440829815196 | 16.73968938232520 | 16.76440829815196 |
| Au | 18.56575302949430 | 6.43424697050570  | 12.53201246099032 |
| Au | 8.35288836674017  | 18.62519859583305 | 14.61078750682976 |
| Au | 8.35288836674017  | 10.38923749317018 | 6.37482640416689  |
| Au | 8.31525974241547  | 10.30837592211302 | 18.69611537196558 |
| Au | 12.52282197964902 | 4.41256741395612  | 12.52279697964891 |
| Au | 14.56325335691417 | 16.58501371268954 | 10.40959200716287 |
| Au | 14.53342323129441 | 10.46657676870559 | 20.56918914759454 |
| Au | 10.48429610037260 | 20.53479792617203 | 14.49529528755509 |
| Au | 6.37482640416689  | 16.64711163325983 | 14.61078750682976 |
| Au | 12.48115452448584 | 12.51884547551416 | 8.44654076811455  |
| Au | 8.41498628731046  | 14.59038299283701 | 14.56325335691417 |
| Au | 12.51537904182474 | 8.50000684645327  | 20.50131465524583 |
| Au | 20.56918914759454 | 10.46657676870559 | 14.53344823129434 |
| Au | 6.37482640416689  | 10.38923749317018 | 8.35288836674017  |
| Au | 12.50669172167811 | 10.45580484042823 | 14.54422015957171 |
| Au | 10.45577984042829 | 12.50666672167817 | 10.45577984042829 |
| Au | 6.33749890560562  | 14.67166536809561 | 8.32927723937882  |
| Au | 16.58501371268954 | 10.40961700716299 | 10.43674664308582 |
| Au | 4.46268100509872  | 8.49268311886675  | 12.50662498995805 |
| Au | 12.52282197964902 | 12.47720302035109 | 20.58740758604376 |
| Au | 10.50470471244491 | 4.46520207382797  | 14.51570389962740 |
| Au | 12.50000000000000 | 6.50744213169751  | 6.50744213169751  |
| Au | 18.62517359583311 | 8.35288836674017  | 10.38923749317018 |
| Au | 16.58501371268954 | 14.56322835691424 | 14.59040799283713 |
| Au | 12.49565150769811 | 14.54743374384346 | 18.52085501476406 |
| Au | 16.68474025758453 | 14.69162407788698 | 6.30388462803442  |
| Au | 8.50000684645327  | 20.50131465524583 | 12.48462095817526 |
| Au | 6.33749890560562  | 16.67072276062118 | 10.32833463190439 |
| Au | 14.53342323129441 | 4.43081085240547  | 14.53344823129434 |
| Au | 10.47295881556192 | 14.52704118443808 | 20.61758424015263 |
| Au | 14.54745874384340 | 18.52088001476400 | 12.50437349230200 |
| Au | 14.49527028755497 | 14.51567889962746 | 4.46520207382797  |
| Au | 8.40712530111567  | 14.60902656626857 | 18.56828547521232 |
| Au | 4.46268100509872  | 12.49337501004195 | 16.50731688113325 |
| Au | 10.38921249317024 | 8.35288836674017  | 18.62517359583311 |
| Au | 8.32925223937888  | 14.67166536809561 | 6.33752390560556  |
| Au | 14.52704118443808 | 10.47295881556192 | 4.38241575984737  |
| Au | 10.38921249317024 | 6.37480140416695  | 16.64708663325989 |
| Au | 16.59287469888433 | 18.56831047521226 | 14.60905156626850 |
| Au | 6.47914498523594  | 12.49562650769800 | 14.54745874384340 |
| Au | 6.47914498523594  | 10.45256625615654 | 12.50437349230200 |
| Au | 18.49255786830248 | 18.49255786830248 | 12.50000000000000 |
| Au | 18.52085501476406 | 12.50437349230200 | 10.45254125615660 |
| Au | 8.44654076811455  | 12.51884547551416 | 12.48115452448584 |
| Au | 8.49265811886663  | 12.50662498995805 | 20.53731899490128 |
| Au | 12.49337501004195 | 16.50731688113325 | 20.53731899490128 |
| Au | 16.67074776062112 | 6.33749890560562  | 14.67169036809555 |
| Au | 4.49868534475417  | 12.51535404182462 | 8.50000684645327  |
| Au | 10.40959200716287 | 10.43674664308582 | 8.41498628731046  |
| Au | 14.69162407788698 | 16.68474025758453 | 18.69611537196558 |

Au 4.38241575984737 10.47295881556192 14.52704118443808  
 Au 18.56575302949430 12.46798753900969 18.56575302949430  
 Au 12.50437349230200 18.52088001476400 14.54745874384340  
 Au 14.61076250682982 16.64711163325983 6.37482640416689  
 Au 6.43171452478768 8.40712530111567 14.60905156626850  
 Au 12.48115452448584 16.55343423188533 12.48115452448584  
 Au 10.30835092211291 8.31525974241547 6.30388462803442  
 Au 20.61758424015263 14.52704118443808 10.47295881556192  
 Au 12.50000000000000 18.49255786830248 18.49255786830248  
 Au 14.54422015957171 10.45580484042823 12.50666672167817  
 Au 14.51570389962740 4.46520207382797 10.50472971244503  
 Au 12.48464595817538 20.50131465524583 8.50000684645327  
 Au 20.53479792617203 14.49527028755497 14.51570389962740  
 Au 16.68474025758453 18.69614037196552 10.30837592211302  
 Au 12.49337501004195 4.46268100509872 8.49268311886675  
 Au 8.50000684645327 12.51535404182462 4.49868534475417  
 Au 8.49265811886663 4.46268100509872 12.49337501004195  
 Au 14.49527028755497 20.53479792617203 10.48429610037260  
 Au 14.69162407788698 6.30385962803448 8.31525974241547  
 Au 14.61076250682982 18.62519859583305 8.35288836674017  
 Au 16.59287469888433 10.39097343373143 6.43171452478768  
 Au 12.50437349230200 10.45256625615654 6.47914498523594  
 Au 12.49333327832183 14.54419515957177 10.45577984042829  
 Au 10.43674664308582 8.41498628731046 14.59040799283713  
 Au 10.45254125615660 12.50437349230200 18.52085501476406  
 Au 18.66247609439444 8.32927723937882 14.67169036809555  
 Au 6.30388462803442 8.31525974241547 10.30837592211302  
 Au 12.53201246099032 6.43424697050570 18.56575302949430  
 Au 12.50664998995816 20.53731899490128 16.50731688113325  
 Au 10.46655176870566 14.53342323129441 4.43081085240547  
 Au 14.59040799283713 14.56322835691424 16.58498871268961  
 Au 10.32830963190445 16.67072276062118 6.33752390560556  
 Au 8.31525974241547 6.30385962803448 14.69164907788709  
 Au 16.76440829815196 8.23559170184805 8.26028561767469  
 Au 14.52704118443808 20.61758424015263 14.52704118443808  
 Au 16.49999315354673 4.49868534475417 12.51535404182462  
 Au 20.58743258604387 12.47720302035109 12.52279697964891  
 Au 18.66247609439444 10.32833463190439 16.67072276062118  
 Au 8.41498628731046 10.43674664308582 10.40959200716287  
 Au 8.32925223937888 18.66250109439438 10.32833463190439  
 Au 14.60902656626857 18.56831047521226 16.59284969888422  
 Au 4.46520207382797 14.51567889962746 14.49529528755509  
 Au 18.56828547521232 16.59287469888433 10.39097343373143  
 Au 12.49565150769811 6.47911998523600 10.45254125615660  
 Au 12.47720302035109 20.58743258604387 12.47717802035098  
 Au 14.54745874384340 12.49562650769800 6.47914498523594  
 Au 18.52085501476406 14.54743374384346 12.49562650769800  
 Au 18.69611537196558 10.30837592211302 8.31525974241547  
 Au 4.49868534475417 16.49999315354673 12.48462095817526  
 Au 16.67074776062112 10.32833463190439 18.66250109439438  
 Au 12.51887047551428 8.44656576811467 12.51884547551416  
 Au 14.51570389962740 14.49527028755497 20.53479792617203  
 Au 12.47720302035109 12.52279697964891 4.41256741395612  
 Au 6.43424697050570 12.53201246099032 6.43427197050581  
 Au 6.50744213169751 6.50744213169751 12.50000000000000  
 Au 20.53479792617203 10.48432110037254 10.50472971244503  
 Au 6.43424697050570 18.56575302949430 12.46798753900969  
 Au 14.67166536809561 8.32927723937882 18.66250109439438  
 Au 16.64711163325983 6.37480140416695 10.38923749317018  
 Au 6.30388462803442 14.69162407788698 16.68471525758441  
 Au 6.50744213169751 12.50000000000000 18.49255786830248  
 Au 16.73971438232531 16.76440829815196 8.23559170184805

|    |                   |                   |                   |
|----|-------------------|-------------------|-------------------|
| Au | 20.53731899490128 | 16.50731688113325 | 12.49337501004195 |
| Au | 8.26028561767469  | 8.23559170184805  | 16.76440829815196 |
| Au | 18.56828547521232 | 14.60902656626857 | 8.40712530111567  |
| Au | 8.23556670184811  | 16.76440829815196 | 16.73968938232520 |
| Au | 4.43081085240547  | 14.53342323129441 | 10.46657676870559 |
| Au | 4.41259241395624  | 12.52279697964891 | 12.47717802035098 |
| Au | 12.50664998995816 | 8.49268311886675  | 4.46268100509872  |
| Au | 14.56325335691417 | 14.59038299283701 | 8.41498628731046  |
| Au | 10.50470471244491 | 10.48432110037254 | 20.53479792617203 |
| Au | 12.48464595817538 | 16.49999315354673 | 4.49868534475417  |
| Au | 10.46655176870566 | 20.56918914759454 | 10.46657676870559 |
| Au | 8.40712530111567  | 6.43168952478774  | 10.39097343373143 |
| Au | 4.46520207382797  | 10.50472971244503 | 10.48429610037260 |
| Au | 20.50131465524583 | 12.48464595817538 | 16.49996815354680 |
| Au | 10.48429610037260 | 10.50472971244503 | 4.46520207382797  |
| Au | 14.59040799283713 | 8.41498628731046  | 10.43674664308582 |
| Au | 6.43171452478768  | 10.39097343373143 | 16.59284969888422 |
| Au | 8.29767831175801  | 16.70232168824199 | 8.29767831175801  |
| Au | 16.49999315354673 | 12.48464595817538 | 20.50131465524583 |

**Pt<sub>43</sub>Au<sub>158</sub>LEH-708.642**

|    |                   |                   |                   |
|----|-------------------|-------------------|-------------------|
| Pt | 12.53406817850735 | 16.47150651099471 | 12.49356782775291 |
| Pt | 16.42430567378105 | 16.46919760653528 | 12.48915580967391 |
| Pt | 10.52326228837338 | 14.50241168822779 | 16.49488300323123 |
| Pt | 10.53419476174451 | 10.52021607343741 | 12.52467724315750 |
| Pt | 12.53088101627305 | 12.50678179949594 | 16.51541669623249 |
| Pt | 12.53698140847237 | 12.49328356002681 | 12.51567852194547 |
| Pt | 14.47730747647685 | 14.47603827923730 | 12.49916952662853 |
| Pt | 12.52820053550249 | 8.56696882871982  | 12.50150618018719 |
| Pt | 14.51328812280858 | 10.49909353589043 | 12.52526453462355 |
| Pt | 14.50848950242001 | 10.50513118863552 | 8.46686708195879  |
| Pt | 12.52780180882918 | 12.52172120836309 | 8.46875131809350  |
| Pt | 16.42810301345357 | 12.51626332844067 | 12.49845661441292 |
| Pt | 16.43733236294860 | 12.52221268718231 | 8.46426316294896  |
| Pt | 12.51255521497932 | 16.46691951440954 | 16.48201868272297 |
| Pt | 10.54966446403748 | 14.48400871790933 | 12.45600190997199 |
| Pt | 14.51034049943548 | 14.53146901796929 | 16.51449328073080 |
| Pt | 14.47291955989886 | 18.46484687606994 | 12.49513085018889 |
| Pt | 10.54471613358723 | 10.53037183834873 | 8.51952498232710  |
| Pt | 14.49387415876929 | 14.53104829045481 | 8.46851620945661  |
| Pt | 12.50643701030846 | 8.56712381872330  | 8.48603486117618  |
| Pt | 8.57651657793145  | 12.50940980046889 | 12.49562243790107 |
| Pt | 14.52264996967034 | 12.48116208778809 | 14.55169130076504 |
| Pt | 16.41699297778828 | 14.53043175529156 | 10.44386861887194 |
| Pt | 12.51964018821645 | 14.51511782518551 | 18.51023661835515 |
| Pt | 14.47608528174136 | 12.51991175968226 | 6.47192633113732  |
| Pt | 12.53554469952686 | 10.53014056550665 | 14.51758152034496 |
| Pt | 12.52753082244582 | 14.43901978639160 | 14.49658818345871 |
| Pt | 10.55337416972190 | 16.41970462117636 | 14.49702269212524 |
| Pt | 10.52710046044543 | 12.47644263311111 | 14.52001480031899 |
| Pt | 14.48473782958795 | 16.48294314095191 | 10.46253948492510 |
| Pt | 14.50277159919144 | 8.56209461406101  | 10.44773464987964 |
| Pt | 10.52435108782599 | 8.58034125781325  | 10.47784695353288 |
| Pt | 12.51579875668710 | 14.48938885879199 | 10.48148072356778 |
| Pt | 16.43379196952277 | 14.52431717540944 | 14.50880543717751 |
| Pt | 12.52916812622560 | 18.45532110458871 | 14.49655768107602 |
| Pt | 14.47950522459105 | 12.50799928467959 | 10.48739888464578 |
| Pt | 8.55113263777882  | 14.47166594358163 | 14.50256855798018 |
| Pt | 12.52572330030061 | 10.53039614960302 | 6.47707069875881  |
| Pt | 12.52527729057609 | 10.54565305417080 | 10.52680321677894 |
| Pt | 8.54325177714864  | 10.53799293931011 | 10.49347078338793 |
| Pt | 16.43474308926991 | 10.54007327028328 | 10.44620193628200 |

Pt 14.50868352913046 16.47634825172863 14.52178780195761  
 Pt 10.54473927222672 12.54957169012932 10.48504420664967  
 Au 14.51527344710297 14.56330500216564 4.35077619468603  
 Au 12.51604172993244 6.48473806805052 18.55805677204637  
 Au 8.29839027003352 10.28889165525044 18.73010747604421  
 Au 12.50371828120005 4.56209504336915 16.51075834196151  
 Au 20.47012582027634 12.50334141567620 16.52193550659368  
 Au 10.50480988407238 14.50572818925825 20.59528262860310  
 Au 10.42301099418359 18.50603204903295 16.53930342260021  
 Au 20.61658543267241 14.52559953667128 14.55192065709825  
 Au 20.51222873080291 10.50151290826001 14.52818762834108  
 Au 10.48630758738022 14.57132851715709 4.36777429288923  
 Au 10.27883421484510 8.27972340883606 18.75034878579578  
 Au 4.37609414767416 14.51255448702656 14.52354756685799  
 Au 14.76144871464640 6.25194833816547 16.78169309499960  
 Au 6.29993735941893 10.29911207259693 16.72636217963214  
 Au 12.49659572681556 6.47936825805171 6.49236595047758  
 Au 14.60979155026810 16.55355937819662 18.61025019843741  
 Au 14.49983304232673 4.37618453383072 10.47787357551247  
 Au 6.30747104425923 8.31460777180366 14.71787468019827  
 Au 14.61830035006018 6.39729427701003 8.39573229320337  
 Au 10.49204071210728 20.56503923564917 10.43214420527586  
 Au 8.36084904581260 6.36667993454130 10.33311452688207  
 Au 10.31827880335894 16.74160074458498 6.23630936244191  
 Au 18.69205723829766 8.30043636529409 14.72668757032422  
 Au 14.50381919667114 20.51368111900566 14.51816056235897  
 Au 6.30092822215405 14.73841186427359 8.22981032434212  
 Au 6.47336004989630 6.49199914312366 12.50872021250946  
 Au 8.35880162265553 18.61667110060273 14.63305954504317  
 Au 18.51797055276004 6.47647244659563 12.50917564922102  
 Au 6.48094545331940 12.53115880814365 6.41041690800216  
 Au 18.60583305492474 16.56537639544513 14.63447892451550  
 Au 16.75403312820753 8.24584589116412 16.78569299400749  
 Au 6.34262772862032 10.35971712646245 8.33020263288648  
 Au 6.30126016556027 16.72553485516714 10.24282427708042  
 Au 16.62763903298583 16.55800603144291 16.63780390120308  
 Au 14.60032695251375 18.53276604388550 16.60686626215289  
 Au 16.64730007065057 6.33034982612635 10.33490648179427  
 Au 12.50766507089030 4.25825501016230 12.51499689489843  
 Au 10.51529244088590 20.54020545464781 14.50276416014109  
 Au 14.54257731814441 4.44275144832127 14.55725165453450  
 Au 12.52488336819366 12.51946046696189 4.31105699758510  
 Au 8.31450815871298 18.70549508682335 10.25310610750281  
 Au 10.39157975968769 6.43243564041963 8.40069234342820  
 Au 12.52329909783683 20.61621277759823 12.48844045148378  
 Au 18.67135479730346 8.33749261850387 10.31691229118865  
 Au 10.42444205687953 8.47826464854691 6.44075568909008  
 Au 16.72202475957788 6.27987376539472 14.74769794619598  
 Au 14.50555562426752 10.48782436176325 4.42505510948474  
 Au 14.59306802088831 8.40913476707061 6.41743247444745  
 Au 18.48392292529702 18.45131626738194 12.49131113985621  
 Au 6.34260573694594 16.62032626254253 14.65040130728520  
 Au 16.58165383032922 18.52943768102267 14.59760713315637  
 Au 18.57410066708852 14.63411339894540 8.36045903212999  
 Au 10.46944311737569 10.45986563860860 20.61665613079448  
 Au 6.35509976172861 8.37851394700683 10.33580112431185  
 Au 8.26131370692013 8.25864962956514 16.77047071006799  
 Au 18.57334954298155 16.59348275158264 10.35629011566256  
 Au 18.55545545605752 12.49449089484735 18.59518776634755  
 Au 14.51355793359747 14.51316586610661 20.63206469082004  
 Au 8.35403941415348 10.37898308083782 6.32379554834780  
 Au 14.55450107819323 10.45135001773672 20.62379233038526

Au 4.48181171733123 14.52706772192665 10.44128020506020  
 Au 16.52859822043088 18.54609502394286 10.38797725630599  
 Au 4.38947518966586 10.50125789363765 10.45158503201421  
 Au 12.49767462283839 18.49356542189965 18.53925741855524  
 Au 16.57996447546871 10.41150059742177 6.40517992521404  
 Au 8.32931354063858 14.65354555248111 18.68264136936137  
 Au 10.40324245367287 16.55076459614270 18.58091076878354  
 Au 20.59737264683514 10.48774718944975 10.45152062282964  
 Au 4.24875491448303 12.51200321478283 12.48411192372753  
 Au 14.67783571616962 18.73091354588271 8.24903359039537  
 Au 16.53479787927829 14.61366026274326 6.38753557656283  
 Au 6.49079744104100 18.51023491504647 12.46895196704326  
 Au 6.44566276217663 12.49003271156860 18.57352134127773  
 Au 18.70239890211918 10.28937184802974 16.74472508034564  
 Au 8.28556577563786 6.30126789659128 14.73936372592943  
 Au 4.45106441831185 10.50422964795216 14.52451065122401  
 Au 8.42964033013103 8.48375989350006 8.44063136673896  
 Au 10.50358587309967 4.41737511860807 10.47989068177953  
 Au 20.66571225218128 12.52723841931454 12.48527777659361  
 Au 16.55334550737340 16.62896145650292 8.34482189521038  
 Au 20.56852441289200 14.52581965897143 10.44382686383701  
 Au 16.60249646349347 8.40172776486796 8.41833133271417  
 Au 18.48582430008295 12.51149819554140 6.47958630499597  
 Au 18.59539164982263 10.38179593579469 8.38810129726402  
 Au 10.47302012114345 4.45349602629753 14.54902526584651  
 Au 18.71304232352176 14.68667209943721 16.72312112727645  
 Au 6.33187713679523 14.65101776931218 16.66246023791685  
 Au 8.28246750660399 16.76235507366197 8.20913393827711  
 Au 16.71398334962928 10.28517674242678 18.75017053708309  
 Au 14.51491043576345 20.57735399826303 10.44389913740309  
 Au 8.30865964231981 14.74065753252238 6.23760618819974  
 Au 14.67211659325377 16.73078177032303 6.24159698330844  
 Au 14.75730909360271 8.24780161347805 18.78678980478159  
 Au 10.26719111060330 6.28498700088783 16.75197959957595  
 Au 12.51324023023916 12.49741460661082 20.75218287984312  
 Au 16.69546079287238 14.66610685268644 18.73073633417708  
 Au 10.51011207182840 10.50510311428012 4.39552019221374  
 Au 10.32210182581747 18.72387607719642 8.24805678560678  
 Au 8.41819164099122 16.52600936104952 16.54836630166227  
 Au 12.50519696469491 18.60754267917267 6.37703580034049  
 Au 16.50628868842708 12.48857952278067 20.53919376620185  
 Au 12.49869889262109 8.53039836419121 4.51511646960645  
 Au 16.43182271914714 12.51583680881688 4.48604839158034  
 Au 6.49913334625974 10.51907847831042 12.48044139012483  
 Au 12.50739985681084 8.50563531331481 20.51410004464749  
 Au 20.50368269869366 16.45222687212026 12.50909299312801  
 Au 12.50870466433965 20.53658626508006 8.43494026467131  
 Au 18.46349954248065 14.52814716642836 12.47717890501960  
 Au 12.50494628143773 16.45880819530565 20.51393436784423  
 Au 12.50346327277689 4.47104989991078 8.49350876548762  
 Au 8.47842655400398 12.51909264720543 16.58115622876468  
 Au 16.43540374681807 20.43979088194503 12.49179553246402  
 Au 20.49384361377044 12.48953783384238 8.48144368629127  
 Au 4.49701603262924 12.50854119588938 16.51988526208359  
 Au 8.53877689141238 20.46203603037667 12.47274976648415  
 Au 10.52619889553778 6.51707380153183 12.46240726129931  
 Au 4.53532958705080 16.46865898178342 12.48218539069928  
 Au 14.50935114714022 6.50392959977043 12.46065030757386  
 Au 10.51851000739159 18.48485770833285 12.50216989051567  
 Au 12.51545665369421 8.45658861915051 16.55722009306167  
 Au 12.50487236891085 16.57261839904992 4.42665452783425  
 Au 12.50056120297788 20.43544758662435 16.48413675056818

|    |                   |                   |                   |
|----|-------------------|-------------------|-------------------|
| Au | 8.51398670760318  | 12.48556006668644 | 20.50146918416569 |
| Au | 16.55608842790351 | 12.55713855226307 | 16.58139092814896 |
| Au | 8.49329012521828  | 12.49999669781137 | 8.42842798195545  |
| Au | 10.45356047176239 | 10.43603331398871 | 16.60065900076652 |
| Au | 10.45307001086415 | 14.59770558319451 | 8.37666270947907  |
| Au | 6.50768335411789  | 14.48915808152285 | 12.51167117727680 |
| Au | 4.53638336483155  | 12.51134946366125 | 8.46000874612726  |
| Au | 12.53726230906701 | 16.57281549155361 | 8.39784568516371  |
| Au | 16.47101870535247 | 4.52416539554806  | 12.51499324211482 |
| Au | 14.59682510332761 | 10.42140800055122 | 16.62467670834445 |
| Au | 18.48470357133372 | 10.53528187300943 | 12.45382555784245 |
| Au | 16.53620517185514 | 8.48729202989966  | 12.44649326593739 |
| Au | 8.53753147116604  | 4.56240526706531  | 12.51357783836537 |
| Au | 8.50397619948452  | 16.50887439567725 | 12.51232861724290 |
| Au | 8.48535226047617  | 8.48189987138642  | 12.47587689751776 |
| Au | 20.44856214344890 | 8.54620315180392  | 12.49496905057998 |
| Au | 8.52960699070165  | 12.53353707106147 | 4.46183584910866  |
| Au | 4.52196247578549  | 8.54762202305932  | 12.48931357635435 |
| Au | 18.46176573210548 | 12.53091297776307 | 10.43726005671606 |
| Au | 8.44616725457752  | 10.43876135848246 | 14.58599796049727 |
| Au | 6.50763089196909  | 12.49678737532729 | 10.45861222738306 |
| Au | 14.51934317472534 | 12.52921261035427 | 18.56343202191087 |
| Au | 12.51684891525419 | 6.51679573652894  | 10.44199288435944 |
| Au | 10.46045896924707 | 16.57389640427127 | 10.39476650979383 |
| Au | 18.49313546619766 | 12.55773611458281 | 14.52407835650322 |
| Au | 10.52516365545270 | 12.52425798108554 | 18.54737633947050 |
| Au | 6.49596520471138  | 12.52028372439422 | 14.54355400351576 |
| Au | 14.59563998857899 | 8.42654673045586  | 14.59445320303611 |
| Au | 12.53227507063997 | 18.52694207290823 | 10.42129015268387 |
| Au | 12.53049312502771 | 14.57509003146174 | 6.41149399722309  |
| Au | 12.52195542910915 | 10.48060448025535 | 18.56831180750217 |
| Au | 16.58972117484340 | 10.43149547776043 | 14.60038054110704 |
| Au | 10.45157889893290 | 8.44472222698032  | 14.57707109598076 |
| Au | 10.50769958185535 | 12.51026069072098 | 6.44447604712657  |
| Au | 12.51838706621123 | 6.48571239279798  | 14.49619419414829 |
| Au | 8.44666073651112  | 14.59129304906552 | 10.38785088885701 |

**Pt<sub>110</sub>Au<sub>295</sub>L1<sub>1</sub>-1518.215**

|    |                   |                   |                   |
|----|-------------------|-------------------|-------------------|
| Pt | 12.02145482854823 | 12.02146740615888 | 6.00696334485960  |
| Pt | 14.02181097516190 | 10.04499725853099 | 6.01830439690905  |
| Pt | 10.04496984890353 | 14.02182641728536 | 6.01829655758491  |
| Pt | 16.10142170006305 | 16.10143473682828 | 5.96552480392201  |
| Pt | 18.08495426986707 | 14.07320976937060 | 5.96964421033730  |
| Pt | 14.07317073534897 | 18.08492786290053 | 5.96965938405808  |
| Pt | 11.92542106475028 | 7.96374932950304  | 9.99735459702471  |
| Pt | 13.97820436375441 | 6.01850310663542  | 10.04523071254935 |
| Pt | 7.96374261670963  | 11.92539419088737 | 9.99730708207783  |
| Pt | 9.93790105684972  | 9.93785653307512  | 9.98894198252946  |
| Pt | 14.02273839016882 | 11.99355502074473 | 7.96683092402204  |
| Pt | 16.07468171380184 | 9.99724398967376  | 7.96378768374784  |
| Pt | 16.03251514388093 | 12.00720214986152 | 9.95538371213718  |
| Pt | 18.06213007635893 | 9.98892359332715  | 9.93790535138911  |
| Pt | 6.01850733449657  | 13.97821212859649 | 10.04521536750305 |
| Pt | 9.99724591771077  | 16.07472491110534 | 7.96375319664325  |
| Pt | 11.99356812358667 | 14.02270882268141 | 7.96684751314051  |
| Pt | 12.00717226479924 | 16.03254601789589 | 9.95541826240795  |
| Pt | 14.00832165646680 | 14.00827959391210 | 9.92883050849396  |
| Pt | 18.10565181781546 | 16.12244615071721 | 7.92085242212812  |
| Pt | 20.06780679105820 | 14.10804417093243 | 7.93218916747251  |
| Pt | 20.07909098529649 | 16.12241879159892 | 9.89430298954295  |
| Pt | 22.03034150801145 | 14.07315970262685 | 9.91502549130631  |
| Pt | 9.98891566787519  | 18.06223713633143 | 9.93788666488459  |

Pt 14.10786918427196 20.06780160927097 7.93225291560574  
 Pt 16.12243311206840 18.10558433996087 7.92090190896025  
 Pt 16.12237256601183 20.07908112919069 9.89439736659468  
 Pt 18.11938820749598 18.11941269727983 9.88053507891887  
 Pt 14.07310286613564 22.03035300553297 9.91509576240627  
 Pt 7.93223880096851 7.93220773212428 14.10811141826286  
 Pt 9.91508151987154 5.96967823093274 14.07328256990526  
 Pt 13.97734172624094 7.96668275632637 11.99354434839914  
 Pt 15.97838617925270 6.00724240299413 12.02165624910730  
 Pt 16.00655101051429 7.96667746843170 14.02274353881688  
 Pt 17.95477382039808 6.01853291784668 14.02182254299379  
 Pt 5.96970986754065 9.91506862262080 14.07324362719831  
 Pt 9.95535941646496 11.96757348816597 12.00725664158490  
 Pt 11.96761999080900 9.95531828714776 12.00727205119769  
 Pt 11.96538190382169 11.96542408870041 14.02049997827539  
 Pt 13.99176599388058 9.92880073310753 14.00835033054603  
 Pt 18.04467590382954 12.00721545560669 11.96759139570325  
 Pt 20.03621791759430 9.99732884217353 11.92542130389293  
 Pt 20.03323634460857 11.99348838525779 13.97730371059997  
 Pt 21.98157768806374 10.04508669478336 13.97821164515055  
 Pt 6.00725146524469 15.97850167847635 12.02159481705416  
 Pt 7.96670914632864 13.97732840795667 11.99353195266880  
 Pt 7.96674943887713 16.00661476899012 14.02274778757108  
 Pt 9.92892440322839 13.99175531554882 14.00833720172036  
 Pt 14.02042909912781 16.03473901692512 11.96543642215056  
 Pt 16.03467671307860 14.02041680685824 11.96539086453548  
 Pt 16.03461636381978 16.03471554129383 13.97961259930260  
 Pt 18.07117878333173 14.00820844601783 13.99172106319321  
 Pt 22.03449834640254 16.10137101736070 11.89859386999887  
 Pt 6.01857383331478 17.95487090499575 14.02184077040621  
 Pt 9.99730548253089 20.03633665378876 11.92541627730061  
 Pt 12.00717056092420 18.04471832019986 11.96761143641879  
 Pt 11.99350088155137 20.03329965280400 13.97733404788823  
 Pt 14.00822910545939 18.07124770298530 13.99174171786939  
 Pt 18.10555237099886 20.07908546922875 11.87757240350599  
 Pt 20.07904993254680 18.10557891437836 11.87753319733886  
 Pt 20.06779322718006 20.06784217609847 13.89220149916074  
 Pt 22.03038703877443 18.08489769573959 13.92691361814180  
 Pt 10.04509229986311 21.98156944796352 13.97822071199412  
 Pt 16.10130370932631 22.03453897161414 11.89864917761071  
 Pt 18.08486418661476 22.03040047541666 13.92692904909249  
 Pt 9.89436443439907 7.92090322564782 16.12252724653111  
 Pt 11.89854922449578 5.96561595182802 16.10150962172007  
 Pt 11.87756100315374 7.92093952984883 18.10565367729108  
 Pt 13.92676031400045 5.96976828966360 18.08491619000472  
 Pt 18.00258323763557 7.96379575533464 16.07459276537283  
 Pt 5.96561894148158 11.89858318394649 16.10145814694348  
 Pt 7.92097418547603 9.89428166191571 16.12252784934269  
 Pt 7.92100509529360 11.87752464814402 18.10568050639112  
 Pt 9.88062015868119 9.88057244806459 18.11944627900730  
 Pt 13.97959805442562 11.96540737033945 16.03469572444941  
 Pt 15.99280931148356 9.95533196813734 16.03246317796556  
 Pt 15.99279418601891 11.96753241040468 18.04464590081400  
 Pt 18.01096710565319 9.93788304683306 18.06207715942751  
 Pt 21.99287133799792 12.02148638956974 15.97853098213364  
 Pt 5.96983375892101 13.92680184804001 18.08490594579206  
 Pt 9.95540902825514 15.99291015222677 16.03250293702292  
 Pt 11.96540623867756 13.97957948861030 16.03466060993796  
 Pt 11.96753181130237 15.99288438767131 18.04460444780475  
 Pt 13.99170927866400 13.99169258572005 18.07108311263785  
 Pt 18.04461822591492 16.03245269928718 15.99284352045106  
 Pt 20.03322440204823 14.02264612414355 16.00650559232096



Pt 20.03627822530986 16.07465540822994 18.00273118018599  
 Pt 21.98159309291289 14.02178720485661 17.95492799773385  
 Pt 7.96377280210180 18.00271788456891 16.07461980207097  
 Pt 9.93789458646566 18.01105659974519 18.06211293403237  
 Pt 14.02264386766343 20.03330803665975 16.00650731606462  
 Pt 16.03240412669101 18.04469157019024 15.99285366754595  
 Pt 16.07460829559838 20.03635406160774 18.00274695744930  
 Pt 18.06215265605037 18.06224072375505 18.01112168148325  
 Pt 12.02147394502927 21.99288666148589 15.97854641979859  
 Pt 14.02177666525503 21.98159213723041 17.95492775292396  
 Pt 13.89190055564242 7.93230123528639 20.06770384202370  
 Pt 9.89440261052000 11.87754081144723 20.07901738227958  
 Pt 11.87756663621433 9.89433743725214 20.07903875332807  
 Pt 11.89858213354491 11.89857075105172 22.03428794415228  
 Pt 13.92673940355011 9.91508864655436 22.03015432481960  
 Pt 18.00262760721633 11.92538640806411 20.03624204872541  
 Pt 7.93228220264419 13.89197011961230 20.06772485916382  
 Pt 9.91512370304300 13.92677847753696 22.03013038145143  
 Pt 13.97729283804362 16.00654733786901 20.03326477778487  
 Pt 16.00650956106743 13.97727990691429 20.03331469488586  
 Pt 15.97841706715046 15.97846261349970 21.99270414947545  
 Pt 17.95477990770334 13.97819980295901 21.98146990332779  
 Pt 11.92537070779408 18.00271679381878 20.03625245360107  
 Pt 13.97818141449462 17.95484120797921 21.98141202177761  
 Au 11.76594344885793 7.74437581554838 5.79848986060378  
 Au 14.00001674785833 5.91209072436596 5.91205058389978  
 Au 13.98193146750075 8.06519771496160 4.08352319894033  
 Au 16.13152461663253 7.92548014768315 5.89233256516657  
 Au 7.74438870438536 11.76594848097443 5.79847072388341  
 Au 9.71233156461595 9.71232899062544 5.78465044724649  
 Au 9.98801515496986 11.95625067342490 4.05143554553905  
 Au 11.95620871569071 9.98804181479325 4.05143870824779  
 Au 13.99185741940190 11.99673199684037 3.80101173363810  
 Au 16.03286471056301 9.99199236124224 3.88843779050223  
 Au 16.06413343250248 11.97042532470616 5.91340495174768  
 Au 18.23510427342391 9.81493704464687 5.75214474008569  
 Au 18.05196228865825 11.99931435371173 3.90889261828797  
 Au 20.17535945520207 11.88989166084609 5.82868465710290  
 Au 5.91210011157210 13.99998721883751 5.91210277304490  
 Au 8.06513960141548 13.98198213368150 4.08351482105924  
 Au 7.92552799040382 16.13152826718234 5.89240627537563  
 Au 9.99202955409575 16.03286706231913 3.88845253415169  
 Au 11.99675472025064 13.99183718600699 3.80102167074671  
 Au 11.97043089715259 16.06410463983262 5.91342538322261  
 Au 14.01734006559821 14.01732986241225 5.88134204447516  
 Au 14.04301554682764 16.05351996504622 3.86106747271784  
 Au 16.05353050951094 14.04298549377012 3.86104622297541  
 Au 18.05285426401161 16.06614430028006 3.90827388471014  
 Au 20.00463801994364 14.03181503465966 3.97081588886712  
 Au 20.18095740786935 16.18074591102040 5.82089896360739  
 Au 22.06522146786238 14.02810526960223 5.93474264879185  
 Au 9.81497353558730 18.23507864570559 5.75220923031820  
 Au 11.99933272854106 18.05195535738134 3.90894843102345  
 Au 11.88988657684794 20.17532174940940 5.82875696455193  
 Au 14.03178280285726 20.00463629844627 3.97084234662273  
 Au 16.06613249847864 18.05283416797724 3.90828368451149  
 Au 16.18063965214459 20.18086686317192 5.82102064476683  
 Au 18.20751424555563 18.20751328281464 5.80360897833310  
 Au 14.02805624363567 22.06520504558560 5.93478680870122  
 Au 11.96719586085333 3.88853073035994 9.99205243068342  
 Au 14.01809689481149 4.08364489266866 8.06524387023368  
 Au 16.04374212991525 4.05159865005345 9.98814256519969

Au 7.72218133850896 7.72215439226628 9.78711952537793  
 Au 9.76493473281445 5.75216489111138 9.81502802133473  
 Au 9.82409823455077 7.82852561333251 7.89802232912905  
 Au 11.86849796981095 5.89238078740982 7.92555159748531  
 Au 14.00001217920825 7.91998022089631 7.92003593771328  
 Au 16.23407502995210 5.79851025063355 7.74437791933290  
 Au 16.09811281317751 7.87860092022760 9.88708994686013  
 Au 18.28764171377356 5.78467178311252 9.71237355313171  
 Au 18.17595083678954 7.89799071738646 7.82854753655717  
 Au 20.17142218809600 7.89804177371626 9.82408115416408  
 Au 3.88851441873774 11.96714869873500 9.99204862471837  
 Au 5.75217186224037 9.76490490210822 9.81503113442608  
 Au 5.89241303371989 11.86847769096972 7.92554907514276  
 Au 7.82855859435619 9.82408474333461 7.89800807870335  
 Au 9.88701485770576 11.90189328325272 7.87865372472223  
 Au 11.90187873984632 9.88699886322796 7.87864746020521  
 Au 11.95342114558098 11.95342405347431 9.92442352413853  
 Au 14.00001773954997 9.93518526537416 9.93529421164571  
 Au 18.12536448962879 11.93045440568919 7.88722778231580  
 Au 20.27788771709527 9.78702132862245 7.72210530473411  
 Au 20.11276810799732 11.93044433804675 9.87467405534120  
 Au 22.24782271359949 9.81498447879356 9.76492185910247  
 Au 22.17129829301504 11.88987586823597 7.82465389978947  
 Au 24.09113266027730 11.99931255807865 9.94804392914446  
 Au 4.08364166858182 14.01809667645720 8.06528315347166  
 Au 4.05163455057605 16.04376276994576 9.98820163404249  
 Au 5.79857874529244 16.23405358041484 7.74444297734350  
 Au 7.91999494955381 14.00000694526969 7.92007447449816  
 Au 7.87864025088055 16.09813771897333 9.88712707442117  
 Au 9.93519838430972 14.00006725784322 9.93530252684162  
 Au 14.01657467663145 16.05763978859599 7.91554435779211  
 Au 16.05763298457906 14.01656450831251 7.91552687966997  
 Au 16.05019757875716 16.05023137759049 9.92923102302650  
 Au 18.07540797510120 14.00685242714472 9.92465056056559  
 Au 22.17907332512704 16.18073812648488 7.81900088481390  
 Au 24.02912365965449 14.03178615235280 7.99533271420036  
 Au 24.09167023472552 16.06609948676284 9.94715371776921  
 Au 5.78471947574657 18.28766412782048 9.71239229304772  
 Au 7.89804657470217 18.17594233345124 7.82859495699147  
 Au 7.89807065262301 20.17143614307749 9.82414633060350  
 Au 9.78719220578442 20.27772111903970 7.72231419084702  
 Au 11.93049457384006 18.12536217890447 7.88726681153073  
 Au 11.93051173972716 20.11279651682318 9.87472461744249  
 Au 14.00685219996310 18.07545504833035 9.92466431233619  
 Au 18.21443921068011 20.21824019712377 7.78174814389958  
 Au 20.21823206544018 18.21446828105532 7.78173690598190  
 Au 20.21821553719569 20.21825316742482 9.78556293294591  
 Au 22.19635683990900 18.20748909100438 9.79247343560015  
 Au 9.81499520532640 22.24776523430197 9.76503075632001  
 Au 11.88987883674482 22.17123055171084 7.82469207060220  
 Au 11.99930681176433 24.09104116485305 9.94806038048703  
 Au 14.03175673145600 24.02912010038936 7.99537965383928  
 Au 16.18062302735602 22.17896003769828 7.81914651436148  
 Au 16.06609525999400 24.09167364499075 9.94718769302291  
 Au 18.20748152740670 22.19638851744982 9.79248434329986  
 Au 7.99540723393220 3.97091088149329 14.03184433356403  
 Au 9.94809629232964 3.90887667524262 11.99937171947179  
 Au 11.94646415060977 3.86113562405805 14.04308032318374  
 Au 14.00816353001016 3.80113976821414 11.99681196959219  
 Au 16.00323368861272 3.80117481402689 13.99185965564187  
 Au 18.01188132692733 4.05159218704967 11.95628894047432  
 Au 19.93474845502835 4.08366516442578 13.98193379723864

|    |                   |                   |                   |
|----|-------------------|-------------------|-------------------|
| Au | 3.97094347425243  | 7.99539211623013  | 14.03185260980369 |
| Au | 5.93485506221649  | 5.93482917190313  | 14.02813313104608 |
| Au | 5.82874367892685  | 7.82467626359448  | 11.88994140221467 |
| Au | 7.82472005719362  | 5.82870359926048  | 11.88995581191016 |
| Au | 9.87466091256039  | 7.88722014882185  | 11.93053554875993 |
| Au | 11.93589572692252 | 5.91342248288803  | 11.97047056655340 |
| Au | 11.94240305595622 | 7.91553073096070  | 14.01664051882944 |
| Au | 13.98269467476918 | 5.88141727326738  | 14.01736318730808 |
| Au | 18.11294097544296 | 7.87862849802604  | 11.90194573226059 |
| Au | 20.25556624025631 | 5.79856430065123  | 11.76599747852953 |
| Au | 20.07995691912103 | 7.92002961178500  | 14.00004093163346 |
| Au | 22.08791338960037 | 5.91213078991298  | 14.00000811000819 |
| Au | 22.10758672781084 | 7.92554495973976  | 11.86849956004656 |
| Au | 23.91642605242992 | 8.06523457144624  | 14.01804172186842 |
| Au | 3.90887665416565  | 9.94808019780599  | 11.99937803722962 |
| Au | 3.86110992506322  | 11.94648908643376 | 14.04305332182498 |
| Au | 5.91344940604023  | 11.93588101929034 | 11.97045577449595 |
| Au | 7.88722741243408  | 9.87462250096304  | 11.93054170189381 |
| Au | 7.91553219057555  | 11.94236942833760 | 14.01663782189937 |
| Au | 9.92461527092762  | 9.92459485134638  | 14.00697689983899 |
| Au | 14.00003790672324 | 11.96784968247269 | 11.96787660681618 |
| Au | 16.04660497491733 | 9.92432031623293  | 11.95348081378047 |
| Au | 16.03220975686248 | 11.96783067881037 | 14.00007158523987 |
| Au | 18.06474547974836 | 9.93521038293260  | 14.00005913536826 |
| Au | 22.08657588926298 | 11.97038049887885 | 11.93589630550544 |
| Au | 24.11150023937773 | 9.99201703411226  | 11.96714593471147 |
| Au | 24.19889626606696 | 11.99668954560129 | 14.00818739161654 |
| Au | 3.80116916540382  | 14.00812464972314 | 11.99682360465452 |
| Au | 3.80122838328789  | 16.00320544557475 | 13.99188230683687 |
| Au | 5.88148959113340  | 13.98270461838110 | 14.01736179815346 |
| Au | 9.92437865228436  | 16.04669861585337 | 11.95345617030323 |
| Au | 11.96783896362398 | 14.00008843444658 | 11.96788375009339 |
| Au | 11.96782933361486 | 16.03227003771665 | 14.00006385521214 |
| Au | 13.99999713231911 | 14.00006240788407 | 14.00008863788386 |
| Au | 18.07075691182507 | 16.05017467928828 | 11.94986563889495 |
| Au | 20.08447577657768 | 14.01651133533461 | 11.94240919934635 |
| Au | 20.08443787291348 | 16.05755605550979 | 13.98348195272245 |
| Au | 22.11860477426452 | 14.01724289713048 | 13.98273522852904 |
| Au | 24.13892242329478 | 14.04294627251002 | 11.94649006655714 |
| Au | 24.13891982860452 | 16.05344606755613 | 13.95701753869115 |
| Au | 4.05165799766000  | 18.01191045525018 | 11.95633167460938 |
| Au | 4.08370091580865  | 19.93478994272569 | 13.98200098945444 |
| Au | 5.79859876418226  | 20.25558006564870 | 11.76601053597222 |
| Au | 7.87866787900401  | 18.11298628239273 | 11.90197353667119 |
| Au | 7.92007741887445  | 20.07997273513260 | 14.00003217597460 |
| Au | 9.93524021636743  | 18.06482960628058 | 14.00004957858888 |
| Au | 14.01653619641684 | 20.08455753062931 | 11.94242126105210 |
| Au | 16.05011811088684 | 18.07082692578879 | 11.94986694681660 |
| Au | 16.05753285423516 | 20.08453780345289 | 13.98347663243404 |
| Au | 18.07534124502273 | 18.07540235267651 | 13.99319461767099 |
| Au | 22.17904184219779 | 20.18091993136400 | 11.81925668806951 |
| Au | 24.09168643436946 | 18.05277061103434 | 11.93388632681834 |
| Au | 24.02910459766962 | 20.00458433868974 | 13.96824288016109 |
| Au | 5.91218073732742  | 22.08791065108402 | 14.00002840569277 |
| Au | 7.92556080624128  | 22.10757637991339 | 11.86857230366314 |
| Au | 8.06528283112394  | 23.91641070521172 | 14.01811668400401 |
| Au | 9.99204263652334  | 24.11148539969836 | 11.96717864113512 |
| Au | 11.97040307981824 | 22.08658965844780 | 11.93597053462731 |
| Au | 11.99672674265686 | 24.19885935285070 | 14.00818269987362 |
| Au | 14.01725695271773 | 22.11866742712620 | 13.98273821875883 |
| Au | 14.04296735205021 | 24.13886367757076 | 11.94650058090630 |
| Au | 16.05345197166904 | 24.13888004903552 | 13.95703244889694 |

|    |                   |                   |                   |
|----|-------------------|-------------------|-------------------|
| Au | 18.05277847678029 | 24.09169557978378 | 11.93388523769651 |
| Au | 20.18089208403530 | 22.17903596161298 | 11.81927780225218 |
| Au | 20.00455857295814 | 24.02912241862067 | 13.96823572615935 |
| Au | 22.06515621449567 | 22.06515808985188 | 13.97195009482050 |
| Au | 9.94717193542925  | 3.90837427488244  | 16.06616183940630 |
| Au | 11.93386836372520 | 3.90836911597312  | 18.05281363993043 |
| Au | 13.95695841637631 | 3.86114900118494  | 16.05356240395729 |
| Au | 16.00062396220527 | 3.90894243700027  | 18.05187669762100 |
| Au | 18.00795086064453 | 3.88857275444217  | 16.03280202776767 |
| Au | 5.82097657856760  | 7.81902673431078  | 16.18079506983004 |
| Au | 7.81906215016028  | 5.82094383991848  | 16.18078464812153 |
| Au | 7.78179248926929  | 7.78176144288262  | 18.21446215715165 |
| Au | 9.79250323085084  | 5.80366271616190  | 18.20750708315392 |
| Au | 13.98343423952474 | 7.91555211756949  | 16.05765031905671 |
| Au | 16.02955899031548 | 5.91344942066903  | 16.06411678229464 |
| Au | 16.06948640582057 | 7.88725328146948  | 18.12536115892707 |
| Au | 18.18495543874309 | 5.75222460760137  | 18.23503084934033 |
| Au | 20.07440963904766 | 5.89243526157114  | 16.13150604437042 |
| Au | 20.10190369521590 | 7.82857062529394  | 18.17586406235130 |
| Au | 22.20144799926886 | 7.74443918225857  | 16.23399644125054 |
| Au | 3.90839405507606  | 9.94716860173399  | 16.06613895661062 |
| Au | 3.90840531574521  | 11.93385001961579 | 18.05279636343831 |
| Au | 5.80369912487325  | 9.79247186722199  | 18.20750913250356 |
| Au | 9.92928332179043  | 11.94984851433989 | 16.05024086452326 |
| Au | 11.94982120866946 | 9.92922342452512  | 16.05025079681617 |
| Au | 11.94983294724902 | 11.94984844447388 | 18.07078795600175 |
| Au | 13.99308895140947 | 9.92462128585964  | 18.07543861713848 |
| Au | 18.07560956638230 | 11.95341053506522 | 16.04662601372076 |
| Au | 20.12131890434162 | 9.88702298649799  | 16.09813060439534 |
| Au | 20.12131173892029 | 11.90188035289853 | 18.11297534350271 |
| Au | 22.21527431307801 | 9.71234015679280  | 18.28764081797760 |
| Au | 23.94843809282337 | 9.98804593364422  | 16.04374946997663 |
| Au | 23.94846089441203 | 11.95620703357899 | 18.01193593254826 |
| Au | 3.86115805809156  | 13.95696483358317 | 16.05354714109999 |
| Au | 3.90893076729016  | 16.00071003676463 | 18.05190459384578 |
| Au | 5.91353256609781  | 16.02955516128955 | 16.06410221455102 |
| Au | 7.91559131558903  | 13.98343406982536 | 16.05765740171158 |
| Au | 7.88726720501315  | 16.06948297261691 | 18.12538258214403 |
| Au | 9.92465152463490  | 13.99313915011197 | 18.07541546622653 |
| Au | 13.99999100857928 | 16.03224662789813 | 16.03221798764630 |
| Au | 16.03217259428136 | 14.00003869323301 | 16.03222794010653 |
| Au | 16.04658040041534 | 16.04664559472209 | 18.07563931713710 |
| Au | 18.06471410591794 | 14.00002152250068 | 18.06480368757736 |
| Au | 22.08655859385298 | 16.06405224088791 | 16.02960539025118 |
| Au | 24.19889034561640 | 13.99175650136879 | 16.00327468434948 |
| Au | 24.11148213725204 | 16.03281838463326 | 18.00795399715227 |
| Au | 3.88853893725578  | 18.00787652754391 | 16.03281158182417 |
| Au | 5.75237200609194  | 18.18489117215163 | 18.23493834739617 |
| Au | 5.89257962640884  | 20.07441399955090 | 16.13150163987478 |
| Au | 7.82867827468420  | 20.10191935906874 | 18.17583543340494 |
| Au | 9.88707289823466  | 20.12133903793824 | 16.09810692743122 |
| Au | 11.95339038633564 | 18.07567907353742 | 16.04664278517020 |
| Au | 11.90189116919463 | 20.12134003287935 | 18.11295437307963 |
| Au | 13.99997734104863 | 18.06480404130566 | 18.06478809547864 |
| Au | 18.12527248610360 | 20.11278861582601 | 16.06954743017755 |
| Au | 20.11270567453016 | 18.12531533195332 | 16.06956218829133 |
| Au | 20.27766682336728 | 20.27770866976402 | 18.21284001484973 |
| Au | 22.24776097044143 | 18.23500379418940 | 18.18498599393940 |
| Au | 22.17122614535990 | 20.17525968826266 | 16.11015134431807 |
| Au | 24.09114468430394 | 18.05189813133709 | 16.00069582077163 |
| Au | 7.74447818841080  | 22.20143129287098 | 16.23405405479085 |
| Au | 9.71236205297111  | 22.21529896207788 | 18.28764846856597 |

Au 9.98812974407194 23.94843125274316 16.04378464589628  
 Au 11.95620691380615 23.94844127685070 18.01188872497588  
 Au 13.99178640792385 24.19885685173823 16.00326670909909  
 Au 16.06399969772761 22.08657886127665 16.02960617905469  
 Au 16.03280249092909 24.11149727004071 18.00796224469304  
 Au 18.23497354268780 22.24779122957376 18.18503740820881  
 Au 18.05189752577430 24.09106491415938 16.00071415403081  
 Au 20.17527823058376 22.17123441352349 16.11016458675146  
 Au 13.96819876691893 3.97094715379546 20.00452093341529  
 Au 9.78556958473848 7.78177080532595 20.21817975506666  
 Au 11.81933814828115 5.82107782253155 20.18078597330607  
 Au 11.81924705028061 7.81908344415033 22.17894849923780  
 Au 13.97192146503779 5.93489783983636 22.06505700243872  
 Au 16.11004153237210 5.82878517192155 20.17520439645495  
 Au 16.11004885842454 7.82474144937819 22.17114342050973  
 Au 18.21285586956621 7.72220579308425 20.27775693592196  
 Au 5.82101075623056 11.81920112562691 20.18088839440941  
 Au 7.78181332885991 9.78554451424077 20.21817238012529  
 Au 7.81910496983040 11.81921422474707 22.17894907894447  
 Au 9.79253263564759 9.79250774112692 22.19624705167426  
 Au 13.98338624040576 11.94235727790892 20.08446669671613  
 Au 16.06945871866289 9.87462828635845 20.11275182159018  
 Au 16.02953289964760 11.93586578736915 22.08652265506390  
 Au 18.18494591565157 9.76493019370349 22.24776615840484  
 Au 20.10190836626396 9.82410821650005 20.17140436868224  
 Au 20.07438871755699 11.86848073910564 22.10753371274020  
 Au 22.20141905230063 11.76596467950677 20.25556169260458  
 Au 3.97101765593836 13.96817037218307 20.00447104637633  
 Au 5.93495356826928 13.97191076464023 22.06501117779179  
 Au 5.82877820983417 16.11014686562844 20.17525308812691  
 Au 7.82472870349368 16.11015069151504 22.17119955919912  
 Au 9.87463835739188 16.06946514701589 20.11274747459278  
 Au 11.94237862863256 13.98339698853905 20.08442601206972  
 Au 11.93590635406141 16.02951237908037 22.08645465637123  
 Au 13.98265643098437 13.98265647379582 22.11852322353367  
 Au 18.11289411528139 16.09810490138332 20.12134258428106  
 Au 20.07991361562904 13.99998307996957 20.07998855181237  
 Au 20.25553353811305 16.23402773425025 22.20140131433793  
 Au 22.08786063095037 13.99997057492422 22.08787694998440  
 Au 22.10751244229878 16.13148595606914 20.07444468212352  
 Au 23.91638857158469 13.98195621755620 19.93481938612831  
 Au 7.72229552363228 18.21284696472931 20.27770142674275  
 Au 9.76506565202822 18.18489026409934 22.24761891522894  
 Au 9.82418004971662 20.10191366998421 20.17133684521308  
 Au 11.86853237016134 20.07439853816661 22.10743864912694  
 Au 13.99998739375093 20.07996911173517 20.07995155320753  
 Au 16.09805666955865 18.11296773643086 20.12132651722098  
 Au 16.23405042199215 20.25559163865731 22.20138607888813  
 Au 18.28762496838705 18.28765659495269 22.21527543559875  
 Au 18.17585920841355 20.17143467482385 20.10194758932629  
 Au 20.17138329506640 18.17590427389521 20.10194514524347  
 Au 11.76593814973035 22.20141208705693 20.25555066268679  
 Au 13.99998109899771 22.08789594560587 22.08785239060127  
 Au 13.98189405750879 23.91638925361182 19.93475558305473  
 Au 16.13143943962213 22.10756653326541 20.07445617837356  
 Au 13.96817260198381 7.99545116459998 24.02892977438368  
 Au 9.94722529243592 11.93386379321248 24.09151458025197  
 Au 11.93387741262297 9.94719155602534 24.09150678019799  
 Au 13.95696512706382 11.94644322584051 24.13876013652915  
 Au 16.00059871525094 9.94806313927116 24.09104698250698  
 Au 18.00787260971592 11.96713980005110 24.11139013294425  
 Au 7.99550206743285 13.96817488539880 24.02892336901733

|    |                   |                   |                   |
|----|-------------------|-------------------|-------------------|
| Au | 9.94807083931164  | 16.00068187264397 | 24.09102108090142 |
| Au | 11.94647184409334 | 13.95694139151119 | 24.13874551336239 |
| Au | 14.00813817616197 | 16.00317531550721 | 24.19874798185019 |
| Au | 16.00317793786643 | 14.00811398104399 | 24.19876429242466 |
| Au | 18.01181280824160 | 16.04374210654319 | 23.94835595501728 |
| Au | 19.93468676348228 | 14.01806809471656 | 23.91634088708198 |
| Au | 11.96719159315085 | 18.00780282155064 | 24.11140856633133 |
| Au | 14.01805330177789 | 19.93472030478534 | 23.91627674589711 |
| Au | 16.04373499276646 | 18.01184230442126 | 23.94833141079950 |

**Pt<sub>10</sub>Au<sub>295</sub>LEH-1523.297**

|    |                   |                   |                   |
|----|-------------------|-------------------|-------------------|
| Pt | 12.01557247594637 | 11.97850151069774 | 6.02382217592768  |
| Pt | 13.99208476646364 | 10.03376553986844 | 6.07313866797044  |
| Pt | 15.97461658281472 | 11.97109768814916 | 6.02541543323917  |
| Pt | 10.04428786444907 | 13.95479917586184 | 6.04424623216977  |
| Pt | 12.00319932060258 | 15.91135913008137 | 6.02201053333605  |
| Pt | 13.98820211254693 | 13.95259054009933 | 5.98673001564860  |
| Pt | 15.96870204113149 | 15.90677541344670 | 6.03284835688435  |
| Pt | 17.93317320576516 | 13.94472223715567 | 6.05937677544037  |
| Pt | 11.96699270010701 | 7.99283152975979  | 9.95424405958639  |
| Pt | 14.00792608746841 | 6.07394841433038  | 10.01350419959053 |
| Pt | 14.00825107560098 | 8.03595003521850  | 8.02403018488496  |
| Pt | 16.05180775162031 | 7.98193438944742  | 9.93445171627582  |
| Pt | 8.03741575591877  | 11.95215404386768 | 9.96178400279261  |
| Pt | 10.01669765536706 | 9.97766315204120  | 9.95853392751461  |
| Pt | 9.98875384013153  | 11.93445893565264 | 7.97856835227504  |
| Pt | 11.95832098075826 | 9.96952840633308  | 7.98997568192958  |
| Pt | 12.00901310314483 | 11.98522458524228 | 9.97906228608677  |
| Pt | 13.99102083911617 | 9.99481088171838  | 9.97986475367482  |
| Pt | 13.99551323202496 | 11.96337378233996 | 8.00368701607497  |
| Pt | 16.04171805153919 | 9.95334531401854  | 7.98257220527525  |
| Pt | 15.97478313579322 | 11.96764688499639 | 9.96854236433762  |
| Pt | 17.98790335658980 | 9.94666276828578  | 9.93812097172599  |
| Pt | 18.00008363967168 | 11.91682242724241 | 7.97483903431576  |
| Pt | 19.95741476405557 | 11.90708981160176 | 9.94566350942598  |
| Pt | 8.06347188880489  | 13.96539630094624 | 8.03040975840790  |
| Pt | 8.02909719120698  | 15.97931226018645 | 9.95625771430797  |
| Pt | 10.02953628588073 | 13.96871199633651 | 9.97557316590266  |
| Pt | 9.99612142402054  | 15.99538362730920 | 7.97908496546387  |
| Pt | 11.98714049695359 | 13.95647839525849 | 7.99755427708417  |
| Pt | 12.01474114404861 | 15.95182592307835 | 9.97679077335903  |
| Pt | 13.98914776040620 | 13.94742062641626 | 9.96023826840826  |
| Pt | 13.99060209658713 | 15.95065560507574 | 8.01276784581453  |
| Pt | 15.98256432061851 | 13.95429847852201 | 8.00286787751037  |
| Pt | 15.97664709073909 | 15.94681006119134 | 9.97428111846889  |
| Pt | 17.95770737027669 | 13.94936202770626 | 9.97732977529486  |
| Pt | 17.98815847442162 | 15.96768089635104 | 8.00135215627527  |
| Pt | 19.93144674022769 | 13.92882710253418 | 8.02671896893268  |
| Pt | 19.95767507645023 | 15.94615337204173 | 9.97071249510132  |
| Pt | 10.00371798738188 | 17.96574907255239 | 9.95556720840491  |
| Pt | 11.96148023777886 | 17.94825911967618 | 8.00409918211193  |
| Pt | 13.97798290333707 | 17.95950108954451 | 9.98373909973171  |
| Pt | 10.01601747808244 | 8.01491594947074  | 11.92557115752990 |
| Pt | 12.02973062854357 | 6.01772495444650  | 11.95377056469427 |
| Pt | 12.00770854908020 | 8.00380619298726  | 13.95321081971550 |
| Pt | 14.01029975455131 | 6.00435304859995  | 13.92650714277855 |
| Pt | 13.99355761451348 | 8.01538035655158  | 11.94513842803874 |
| Pt | 15.99436300312184 | 6.03380643146928  | 11.94853914439680 |
| Pt | 15.98128577407362 | 8.02142903262913  | 13.93120910565515 |
| Pt | 17.92398613984257 | 6.06885506981410  | 13.94184965158913 |
| Pt | 18.00406398308194 | 7.97446998909893  | 11.90119860770896 |
| Pt | 19.91310428192465 | 8.03789730205756  | 13.92789717230843 |

|    |                   |                   |                   |
|----|-------------------|-------------------|-------------------|
| Pt | 8.05226061832330  | 10.00162842115770 | 11.92327973399659 |
| Pt | 8.03566467196168  | 11.99036632043818 | 13.93881399755188 |
| Pt | 10.02621046805593 | 9.99079476796045  | 13.97476370721879 |
| Pt | 10.02184396343242 | 11.97879816409746 | 11.97041222341744 |
| Pt | 12.01071117625424 | 9.99648602069107  | 11.96780630769665 |
| Pt | 12.00724773501480 | 11.99303469134297 | 13.94379597400647 |
| Pt | 13.99144410670649 | 9.97634404330738  | 13.93858150380417 |
| Pt | 13.99246597047923 | 11.97482005769413 | 11.95570901767406 |
| Pt | 15.97398902221861 | 9.97514310455945  | 11.93974657306515 |
| Pt | 15.97529730079642 | 11.97120352680328 | 13.94487367730956 |
| Pt | 17.94312453954691 | 9.99257457807404  | 13.92344741142068 |
| Pt | 17.96969741579026 | 11.96229657063389 | 11.94180986538093 |
| Pt | 19.95005374032596 | 9.95189167950131  | 11.89950247329599 |
| Pt | 19.95083253834094 | 11.94913324461801 | 13.92250563972765 |
| Pt | 8.03256339643298  | 13.96661479328853 | 11.93650635515332 |
| Pt | 8.05228700714421  | 15.93776941027130 | 13.92139387346688 |
| Pt | 10.00257925034245 | 13.96910108013432 | 13.96411387694982 |
| Pt | 10.02559610807698 | 15.96574117866514 | 11.95294402080346 |
| Pt | 11.99391786687816 | 13.97307270698678 | 11.95439018000071 |
| Pt | 12.00657910572473 | 15.94786640693528 | 13.94889882984706 |
| Pt | 13.98899520325798 | 13.95755687830563 | 13.94173024302257 |
| Pt | 13.99690675806440 | 15.94710517764186 | 11.96194181059996 |
| Pt | 15.98757177780724 | 13.94474063964200 | 11.96843052296576 |
| Pt | 15.96772744488646 | 15.95940555737932 | 13.95387574461976 |
| Pt | 17.98772368912200 | 13.94899381154285 | 13.95896214737633 |
| Pt | 17.96014973213604 | 15.94450990896806 | 11.95481177002725 |
| Pt | 19.95545805004186 | 13.93110314224690 | 11.94866282262405 |
| Pt | 8.03523203253764  | 17.93920256214577 | 11.91422050756944 |
| Pt | 10.02917340709967 | 17.94174155222296 | 13.93644968629285 |
| Pt | 11.99925475286636 | 17.98928641121190 | 11.94278510394585 |
| Pt | 11.98311999695941 | 19.99064132563227 | 13.92947976449697 |
| Pt | 13.95257543390924 | 17.99480909354137 | 13.92401888652913 |
| Pt | 13.97245129229441 | 19.99530528890741 | 11.94574423024164 |
| Pt | 15.96416924414199 | 17.96572636254634 | 11.95402880550431 |
| Pt | 13.98703823707591 | 8.01973443797356  | 15.94862977336695 |
| Pt | 15.96901800710967 | 6.03402213523178  | 15.91023953384577 |
| Pt | 15.99126683492582 | 8.03434905868298  | 17.94485332178203 |
| Pt | 17.95692276922215 | 8.01912484271176  | 15.96602512038642 |
| Pt | 10.01364474913963 | 11.96445140327846 | 15.96166136529841 |
| Pt | 11.99151300198818 | 9.98023653106156  | 15.95272550940480 |
| Pt | 11.98801080787685 | 11.94867203470411 | 17.99820066212652 |
| Pt | 13.95855255837462 | 9.99367924024574  | 17.94372802739406 |
| Pt | 13.96884519898036 | 11.99195148340191 | 15.94466898419360 |
| Pt | 15.95384776695112 | 10.00331231685195 | 15.93260637322535 |
| Pt | 15.95433588858763 | 11.97375483821697 | 17.95057592091060 |
| Pt | 17.94828982806818 | 9.98485822698442  | 17.94177274003779 |
| Pt | 17.95582627586373 | 11.96324932390995 | 15.94886320554858 |
| Pt | 19.93970978841093 | 9.98126192875030  | 15.93676548842052 |
| Pt | 8.03825697584895  | 13.96208222992560 | 15.92874677449789 |
| Pt | 10.02107464336168 | 13.93871317579969 | 17.96739644096309 |
| Pt | 10.02450164082081 | 15.94467239065106 | 15.96069893319199 |
| Pt | 12.00747888689478 | 13.95139035384509 | 15.97025549143558 |
| Pt | 11.99520249631969 | 15.93708063554545 | 17.96262990198069 |
| Pt | 13.97782862259995 | 13.94337491526486 | 18.00534053240191 |
| Pt | 13.97043122242250 | 15.95209648051934 | 15.95507524603643 |
| Pt | 15.97109524420713 | 13.97440055175617 | 15.95768487197670 |
| Pt | 11.98284572759794 | 17.95262070370017 | 15.93607194578808 |
| Pt | 13.97569267748252 | 11.95456358693727 | 19.98629052306565 |
| Pt | 11.99140033882272 | 13.93906933498445 | 20.00312534831944 |
| Au | 11.88826440442437 | 7.90839663940725  | 5.92516018979707  |
| Au | 13.99637254353938 | 5.99995561824719  | 5.99680090409936  |
| Au | 13.98933561237979 | 8.08640202161804  | 4.04936424888528  |

Au 16.10778650382307 7.90122795335604 5.90129693745971  
 Au 7.89294966830221 11.89399394485068 5.93564229476425  
 Au 9.87032026764663 9.87394281387019 5.90478899907757  
 Au 10.00402004185196 11.97189343100820 3.97480243713839  
 Au 11.97083453471102 10.00706416193911 3.97032843656163  
 Au 13.99458869338491 11.97690722357246 3.86469689702816  
 Au 16.01258962604119 10.00483232494382 3.96272379834152  
 Au 18.12612736306142 9.86329379874297 5.87981385988250  
 Au 17.97560761637958 11.97053413549976 3.97247165140311  
 Au 20.09567297745663 11.88050686659694 5.92156689001119  
 Au 5.98273890283503 13.99936856971873 6.03419702510923  
 Au 8.06268475055005 13.98839083388772 4.05333622320383  
 Au 7.92748652644199 16.07104567466382 5.95054402879649  
 Au 10.02741693463904 15.97989014362085 3.98064866618078  
 Au 12.01798659669813 13.95804511000603 3.86637271983649  
 Au 14.00055773751846 15.93240125059460 3.85727055009558  
 Au 15.96758553123391 13.94925515731126 3.86727533288608  
 Au 17.93943092297989 15.98814602185779 4.01373397122949  
 Au 19.90778623538690 13.99790958700241 4.07234761087463  
 Au 20.03778566683674 16.06287383581548 5.99273456355675  
 Au 22.00233342873208 13.99405547610880 6.04405159050918  
 Au 9.93484448968588 18.07958553908690 5.93009025856802  
 Au 11.97993237598897 17.95782773771652 3.94758054614564  
 Au 11.83269552579508 20.15856036959412 5.84722609437809  
 Au 13.95714768765992 17.94345360734829 5.99367357855403  
 Au 13.99564755964010 19.96434687170257 4.03214027043306  
 Au 16.00078312260515 17.97919913712340 4.00888223236189  
 Au 16.19319241268294 20.21842245920067 5.80943802016534  
 Au 18.10428991276495 18.12241723786846 5.93080086423849  
 Au 13.99039828714147 22.05385545252069 5.95621339663211  
 Au 11.97299067620417 3.95845642727210 10.00010184981128  
 Au 13.99681063206607 4.04604419972039 8.07838025273091  
 Au 16.03172400298694 3.96751878631372 9.98547110087189  
 Au 7.87557816113274 7.88820941460353 9.92351596601347  
 Au 9.87436258556817 5.89880543264071 9.91261996498558  
 Au 9.85869876181594 7.87536757846343 7.89486622852950  
 Au 11.89458397273269 5.92264127595612 7.91795305235750  
 Au 16.11629996141955 5.90532022207067 7.88119274445409  
 Au 18.13859578881717 5.88127721708923 9.85161911487274  
 Au 18.15821587476060 7.84948685598310 7.84251679726047  
 Au 20.14642498229037 7.87054141057122 9.85188327081434  
 Au 3.83133542713393 11.93681905479172 9.94470927147763  
 Au 5.84371642796981 9.85384730629657 9.87463044223224  
 Au 5.85908933435176 11.86167504588571 7.89891223763347  
 Au 7.87073704847077 9.87691790282257 7.91198374721513  
 Au 20.14255766617996 9.85353999446598 7.86803208796531  
 Au 22.17165740532160 9.84162294838792 9.84295114908956  
 Au 22.14569919104096 11.84368860726906 7.88210421645680  
 Au 24.15605825830693 11.92767862201885 9.94795023987861  
 Au 3.93160402092879 13.99018194355311 8.00454223833230  
 Au 3.85087854270133 16.03549677558838 9.94602990517533  
 Au 5.97174535459381 13.97637431683940 9.92605308922009  
 Au 5.86656909782737 16.12321836984326 7.89145982069465  
 Au 22.01218436647865 13.94003589468555 9.94800415990171  
 Au 22.08066098655895 16.09669090579845 7.95174846801820  
 Au 24.04724016752223 13.99237118667955 8.02310711310243  
 Au 24.16371922730305 16.03188449510816 9.95880435060833  
 Au 5.88755923986098 18.10558224876517 9.88404941701534  
 Au 7.91347051377511 18.08752338048209 7.92121496604592  
 Au 7.87951411024775 20.13755478241251 9.86877353712824  
 Au 9.87138182338533 20.14613393487497 7.86456556125336  
 Au 11.93516398558881 20.05981771488805 9.89246932392882



|    |                   |                   |                   |
|----|-------------------|-------------------|-------------------|
| Au | 13.97146848333477 | 20.01950999430645 | 7.92530941140792  |
| Au | 16.02922541007217 | 18.03252002094498 | 7.94065619341808  |
| Au | 16.03109970507900 | 20.07130064076474 | 9.92966764870024  |
| Au | 18.02945286082448 | 18.03470784644640 | 9.94529733356732  |
| Au | 18.20746146776977 | 20.24546468115954 | 7.80472510648701  |
| Au | 20.11212705088376 | 18.13040236878008 | 7.92641560657758  |
| Au | 20.26750792025639 | 20.28800672226360 | 9.75847051318454  |
| Au | 22.20806990626383 | 18.18940419819155 | 9.81669291208391  |
| Au | 9.76340597613962  | 22.27023438459429 | 9.74931943391843  |
| Au | 11.75810386090001 | 22.26645088736574 | 7.75405947942287  |
| Au | 11.93865402775091 | 24.14306308367385 | 9.94060902091275  |
| Au | 13.98263653867124 | 22.06237611840517 | 9.95951921242547  |
| Au | 13.99678315817102 | 24.01395162255698 | 7.99861749780436  |
| Au | 16.20899651427828 | 22.23158032720264 | 7.79310803950309  |
| Au | 16.05103912745886 | 24.16137172806799 | 9.93582277143492  |
| Au | 18.23737555128416 | 22.28398856922528 | 9.76336117139534  |
| Au | 8.01674622134513  | 4.00223412348570  | 13.97843424773925 |
| Au | 9.99074297084675  | 3.91243540806129  | 11.95135514006877 |
| Au | 12.04893957520252 | 3.82736152660258  | 13.93492361823052 |
| Au | 14.01348692122921 | 3.88063434664697  | 11.95350014517830 |
| Au | 15.97736305285347 | 3.88403671258164  | 13.94498241211877 |
| Au | 17.99117589945167 | 3.97235852457826  | 11.96257019404611 |
| Au | 19.90755771920682 | 4.08170748628908  | 14.00058367188464 |
| Au | 3.99312785129552  | 8.00740906542512  | 13.98255615920291 |
| Au | 5.94635947291296  | 5.94710027025360  | 13.98968570819257 |
| Au | 5.78194635650943  | 7.80657459555583  | 11.79975201975334 |
| Au | 7.77901651956635  | 5.77956062555709  | 11.79016248719697 |
| Au | 7.96289869061626  | 7.95294530825434  | 13.88651800764593 |
| Au | 9.99996194039539  | 5.97850800185152  | 13.90867885536338 |
| Au | 20.10121866178959 | 5.92419519807905  | 11.88289515882335 |
| Au | 21.99774212596997 | 6.04797976955585  | 14.00287330010638 |
| Au | 22.14087820814931 | 7.88497712014033  | 11.85082723491228 |
| Au | 24.04276830161257 | 8.02153011316703  | 13.99785494290298 |
| Au | 3.83305339491404  | 9.94820740829385  | 11.92561948245559 |
| Au | 3.70806522340847  | 11.98737402700082 | 13.94482022028288 |
| Au | 5.97319298378008  | 9.97926127426739  | 13.90675286808717 |
| Au | 5.93551479610639  | 11.95844462629283 | 11.91208989907429 |
| Au | 22.00350821230728 | 9.94417373572576  | 13.94484043309941 |
| Au | 22.04626623413533 | 11.91740689524718 | 11.91850651488694 |
| Au | 24.15503268477325 | 9.95192112123583  | 11.94019913749860 |
| Au | 24.29989304004734 | 11.94856622868883 | 13.96287816279405 |
| Au | 3.71792439656002  | 13.97865810881889 | 11.93954926113162 |
| Au | 3.70927019368806  | 15.96647177128265 | 13.95222725811742 |
| Au | 5.89278810231226  | 13.96476102911472 | 13.91835228090433 |
| Au | 5.93203323153639  | 15.97280911451865 | 11.92176565832468 |
| Au | 20.04787196148705 | 15.97169957905049 | 13.92766695970604 |
| Au | 22.13601630685756 | 13.91354011797295 | 13.91463700917739 |
| Au | 22.09213957861877 | 15.96740884874731 | 11.89958113791516 |
| Au | 24.29441107665958 | 13.95399910264282 | 11.94748807408893 |
| Au | 24.25114674682368 | 15.97025453867816 | 13.95330753652544 |
| Au | 3.87518187761822  | 18.01525338417859 | 11.93949624360796 |
| Au | 4.03721977169900  | 19.96260002708563 | 13.98576597885877 |
| Au | 5.99271055601048  | 17.95801244082759 | 13.91609770539292 |
| Au | 5.85704883727282  | 20.14866133500433 | 11.81642914031086 |
| Au | 7.96134206358531  | 19.99735381505845 | 13.92845352680147 |
| Au | 9.93799319295267  | 20.04962306165112 | 11.89836261034196 |
| Au | 16.00385892743448 | 20.05620383754317 | 13.92124271771898 |
| Au | 18.03932592405357 | 18.02959668904990 | 13.91124222481665 |
| Au | 18.10408849595321 | 20.12741018993231 | 11.86157031756953 |
| Au | 20.10401731540531 | 18.05612672040544 | 11.85351051669087 |
| Au | 20.09476433860687 | 20.07149215033231 | 13.94839659168065 |
| Au | 22.07075739966281 | 18.00986310964793 | 13.95194266231840 |

|    |                   |                   |                   |
|----|-------------------|-------------------|-------------------|
| Au | 22.27114032931663 | 20.26319177668337 | 11.75019612260967 |
| Au | 24.12127410525467 | 18.04812202713874 | 11.93182086206032 |
| Au | 24.00040233444019 | 20.00235752661369 | 13.99071353773902 |
| Au | 5.97450409338216  | 22.03564847442184 | 13.98601648937518 |
| Au | 7.77487772960134  | 22.25475147997990 | 11.75502852115234 |
| Au | 8.00815883293265  | 24.00526554546748 | 13.98666170706221 |
| Au | 9.97795178436797  | 22.05426265569892 | 13.95122413442896 |
| Au | 9.95411101174780  | 24.14054146584221 | 11.92791345674393 |
| Au | 11.96274846659371 | 22.10247759292268 | 11.93679753548175 |
| Au | 11.97517467918260 | 24.36533740701937 | 13.96376457440820 |
| Au | 13.96003452941857 | 22.17068081720577 | 13.92158985456514 |
| Au | 13.98259778309849 | 24.36964738068421 | 11.95152226031880 |
| Au | 16.00134013933786 | 22.14943677249942 | 11.93880421676779 |
| Au | 15.99782937502073 | 24.30435883736517 | 13.97217013915161 |
| Au | 18.04795140540243 | 22.08377355528086 | 13.96576491306546 |
| Au | 18.06168484304270 | 24.14500162437028 | 11.93404518363300 |
| Au | 20.26690692714838 | 22.28258348787852 | 11.75589010532876 |
| Au | 20.02392746425515 | 24.02346925445931 | 13.99194019212719 |
| Au | 22.07465641762034 | 22.07376966716417 | 13.99505633559519 |
| Au | 10.00365999828747 | 3.92839908070832  | 15.98987863728724 |
| Au | 11.99343859398950 | 3.92810661993786  | 17.99651450956291 |
| Au | 14.03272881918107 | 3.81879807618541  | 15.93847708695802 |
| Au | 16.02866930216632 | 3.95683140325435  | 17.98745689779479 |
| Au | 17.95276248044979 | 4.01372881212508  | 15.99270625349192 |
| Au | 5.80215662743182  | 7.79341792607246  | 16.17263677380010 |
| Au | 7.81350597649268  | 5.80287999330569  | 16.16236077965607 |
| Au | 7.79741439656838  | 7.78663814324718  | 18.18289123691483 |
| Au | 9.82577553770277  | 5.80382694151683  | 18.16549697002521 |
| Au | 9.93310810049054  | 7.91046922773033  | 16.00666876978723 |
| Au | 12.02546991036787 | 5.93210867351913  | 15.94802507586508 |
| Au | 11.94529434206195 | 7.91047368380313  | 18.03684588549653 |
| Au | 14.04654983082700 | 5.98117236100487  | 17.97436857226028 |
| Au | 18.03347282864198 | 5.99200328665527  | 18.07352850518507 |
| Au | 20.02767343449637 | 6.01023031908756  | 16.06108838740395 |
| Au | 20.05293396998379 | 8.01791641640148  | 18.07368153795571 |
| Au | 22.08472097618116 | 7.94975970070143  | 16.10562876120778 |
| Au | 3.92003341610184  | 9.96831731510606  | 16.00220605653161 |
| Au | 3.91893328910590  | 11.94643665187710 | 18.00527999806445 |
| Au | 5.80173653525347  | 9.79411490972438  | 18.18062100131567 |
| Au | 5.92368639061348  | 11.98355946998570 | 15.93477031745510 |
| Au | 7.92679937084397  | 9.92388590295026  | 15.99693504163874 |
| Au | 7.92941491954892  | 11.93147792842389 | 18.02655197336314 |
| Au | 9.93321850040297  | 9.91540085579415  | 18.03715174915732 |
| Au | 20.07295042196516 | 11.83203845536358 | 18.04291828999262 |
| Au | 22.22770506497530 | 9.81853791025384  | 18.19476590979283 |
| Au | 22.08625025989084 | 11.89480316847035 | 15.96540002471133 |
| Au | 24.16584799579476 | 9.95883380733625  | 16.03195556795805 |
| Au | 24.12380700221087 | 11.93851652651218 | 18.04058185102911 |
| Au | 3.70075885602064  | 13.97982716264025 | 15.95642201861268 |
| Au | 3.93958609951737  | 16.01938584697217 | 17.99392957344905 |
| Au | 5.97150086028004  | 13.97906874181293 | 17.94801145918639 |
| Au | 5.94746353668798  | 15.96083620784991 | 15.92977761199026 |
| Au | 7.96943092576324  | 16.00047959211175 | 18.01757628991022 |
| Au | 15.99799831750394 | 15.99013562367879 | 18.02466773330913 |
| Au | 18.03634770576705 | 13.93535417136427 | 18.02810731446230 |
| Au | 18.02771980258671 | 15.99375041551719 | 15.98232147402180 |
| Au | 20.04774864798731 | 13.92696173305610 | 15.97187736523588 |
| Au | 20.12051980781075 | 16.04833071852601 | 18.08467072975485 |
| Au | 22.06105578762006 | 13.93417449054238 | 18.01212678278018 |
| Au | 22.11302307643566 | 15.97124910732008 | 15.97772494291878 |
| Au | 24.25621779444132 | 13.95404404846893 | 15.97116565795218 |
| Au | 24.09317685555783 | 16.02718579368054 | 18.02387339479961 |

|    |                   |                   |                   |
|----|-------------------|-------------------|-------------------|
| Au | 3.94870540523651  | 17.99455259312249 | 15.99441422132610 |
| Au | 5.85179633806903  | 18.15661607932432 | 18.15821603465682 |
| Au | 5.83092131747172  | 20.17540658073362 | 16.17450774562711 |
| Au | 7.96945804773746  | 18.00919550740455 | 15.99316743760941 |
| Au | 7.84897865877642  | 20.16589276910268 | 18.16046516455816 |
| Au | 9.98282006812707  | 18.02649085737060 | 18.03183533703216 |
| Au | 9.97039934982436  | 20.04786803795600 | 15.99024623827756 |
| Au | 11.90574439407795 | 20.11498149705178 | 18.07642825003146 |
| Au | 13.93718221617194 | 18.02883662085317 | 18.03006892329028 |
| Au | 13.95237719163543 | 20.04705277874217 | 15.97080110858876 |
| Au | 15.98665417865057 | 18.01829922313896 | 15.96916636781200 |
| Au | 16.06765690441437 | 20.10467934321219 | 18.07851227874466 |
| Au | 18.11097657988369 | 18.09580148770768 | 18.09596762187003 |
| Au | 18.09451796668978 | 20.10657905191945 | 16.04621035520632 |
| Au | 20.11875913093904 | 18.08095996215076 | 16.04847549904164 |
| Au | 20.24722948050703 | 20.24446771312175 | 18.22380882114148 |
| Au | 22.23724370882069 | 18.22069030295329 | 18.22029452856808 |
| Au | 22.25588864924317 | 20.25029750694396 | 16.22810790631720 |
| Au | 24.08737265309833 | 18.02721322967260 | 16.03410410704660 |
| Au | 7.82036077135336  | 22.18667039474142 | 16.18009587166443 |
| Au | 9.79489278277076  | 22.23064228774557 | 18.20308523818196 |
| Au | 9.95323732468859  | 24.13233189841236 | 16.02907510861461 |
| Au | 11.96888431975370 | 22.13509971254872 | 15.95748440111888 |
| Au | 11.95154067646670 | 24.10890070377699 | 18.03442225751620 |
| Au | 13.98925639571180 | 22.07318919230016 | 18.01777959332660 |
| Au | 13.98875811655446 | 24.30470678670054 | 15.98003489005521 |
| Au | 16.00374702935298 | 22.12249862133139 | 15.97906881772283 |
| Au | 16.04888138601947 | 24.10336431462122 | 18.03657704693725 |
| Au | 18.22756555023709 | 22.23827477179176 | 18.22113275257196 |
| Au | 18.05273850591189 | 24.10849493746143 | 16.03980471108554 |
| Au | 20.25144111634058 | 22.25012308058537 | 16.22294689609247 |
| Au | 14.01322268546190 | 4.02268962455055  | 19.98024779843535 |
| Au | 9.79851618330222  | 7.77793256073599  | 20.20882752827208 |
| Au | 11.80814893956415 | 5.78588182218393  | 20.19966257916829 |
| Au | 11.79223413480888 | 7.77505555640512  | 22.21972940307831 |
| Au | 14.00772026785189 | 5.95839972773711  | 22.05336989503525 |
| Au | 14.02967806654002 | 7.93551941442605  | 20.02568166086720 |
| Au | 16.17927773175532 | 5.86241086957693  | 20.18474046228553 |
| Au | 16.24476460956004 | 7.77277152836820  | 22.27461536520690 |
| Au | 18.10559553223747 | 7.92738077503252  | 20.13788879307558 |
| Au | 5.77901640771288  | 11.75895151111790 | 20.22079843174394 |
| Au | 7.79076045371429  | 9.78628487348916  | 20.20717294563435 |
| Au | 7.76901015172523  | 11.76071608439588 | 22.24275599420119 |
| Au | 9.79195237135420  | 9.77824313920998  | 22.22569486948692 |
| Au | 9.92341159874947  | 11.91892710075988 | 20.07822738893849 |
| Au | 11.94404366569179 | 9.90076210643802  | 20.07616685426501 |
| Au | 11.98565606803840 | 11.95768560378711 | 22.11399217581729 |
| Au | 14.00817782746218 | 9.96874940472260  | 22.06112140198060 |
| Au | 16.02587196613850 | 9.94759500775078  | 20.04095119333155 |
| Au | 16.01845351566478 | 11.93476532611919 | 22.14267426590412 |
| Au | 18.24025789115717 | 9.76403765695519  | 22.29769656854044 |
| Au | 18.08912133441116 | 11.84820598973239 | 20.09002719064562 |
| Au | 20.22045326673811 | 9.80642329970040  | 20.24563487577096 |
| Au | 20.25444625868460 | 11.76706900158484 | 22.27728647912159 |
| Au | 22.25759390151809 | 11.75995173029995 | 20.25520710219174 |
| Au | 4.05281121517090  | 13.98937974433200 | 19.96162960080252 |
| Au | 5.96696446699580  | 13.98950116954229 | 22.04404176608661 |
| Au | 5.81256222407421  | 16.20329515294303 | 20.20133474457960 |
| Au | 7.95012856082967  | 13.97949910276349 | 20.04045320773261 |
| Au | 7.79610643804994  | 16.20773291750725 | 22.22804845447326 |
| Au | 9.98965110175542  | 13.97384162358854 | 22.07185628395377 |
| Au | 9.97813311659870  | 16.00337843464345 | 20.06336368644294 |

|    |                   |                   |                   |
|----|-------------------|-------------------|-------------------|
| Au | 11.97887449885231 | 15.96886062860637 | 22.15158314700189 |
| Au | 13.97532867248971 | 13.93142402561666 | 22.17881950397913 |
| Au | 13.95731212558220 | 15.98249714391944 | 20.05850036805079 |
| Au | 16.01144726548159 | 13.92772048152765 | 20.06301356230811 |
| Au | 16.01123761658720 | 15.98035752749087 | 22.13109055526674 |
| Au | 18.05837456693970 | 13.95147516473045 | 22.07994788764764 |
| Au | 18.10008007196841 | 16.04975769609318 | 20.11687659751193 |
| Au | 20.08833700730888 | 13.93544194329691 | 20.06474382009199 |
| Au | 20.24538277347645 | 16.21804630683739 | 22.24445389014492 |
| Au | 22.07167382674599 | 13.99834733005073 | 22.07120339831266 |
| Au | 22.25448687646584 | 16.22836836248062 | 20.24360373870063 |
| Au | 23.99933550508126 | 13.99741646067077 | 19.99938824146432 |
| Au | 7.84468954977906  | 18.16252035139972 | 20.17967638096904 |
| Au | 9.79087266068041  | 18.20564042343312 | 22.24807391783713 |
| Au | 9.79089281627643  | 20.22906533211192 | 20.23461061060014 |
| Au | 11.90503886719899 | 18.08485544644669 | 20.12756375833477 |
| Au | 11.76277668853323 | 20.25644061422097 | 22.26719969908082 |
| Au | 13.99338100108250 | 18.02171587156279 | 22.08374200320447 |
| Au | 13.99347109145949 | 20.08893820980753 | 20.09040163516458 |
| Au | 16.07189882685266 | 18.08219948091820 | 20.11338655336740 |
| Au | 16.24137585667476 | 20.25541478626912 | 22.25663284027192 |
| Au | 18.23359981125470 | 18.22830435873915 | 22.24757166285943 |
| Au | 18.23632198655022 | 20.24545575608817 | 20.24693890312665 |
| Au | 20.24922957992399 | 18.22972342682348 | 20.24546658284535 |
| Au | 11.76174663046440 | 22.25678629808841 | 20.26046448464680 |
| Au | 13.99728833372720 | 22.07872819930884 | 22.08268975764341 |
| Au | 14.00070501542923 | 23.99791018628513 | 20.00788161274419 |
| Au | 16.24086552646842 | 22.25206322815369 | 20.25377556445264 |
| Au | 14.00766840743896 | 8.00501176325474  | 24.01023507328371 |
| Au | 9.95569967637130  | 11.93187051427222 | 24.12508379855538 |
| Au | 11.95231728889190 | 9.94462467409986  | 24.13029389756422 |
| Au | 14.00185409604453 | 11.95494732513922 | 24.37547951507056 |
| Au | 16.06292218423897 | 9.93825401719308  | 24.17335734396237 |
| Au | 18.05876115621198 | 11.93888245937464 | 24.16067955638832 |
| Au | 8.00794812166666  | 13.99132990541962 | 24.00611363190302 |
| Au | 9.95339038267532  | 16.03975136803629 | 24.14912387758719 |
| Au | 11.98791358910214 | 13.97261611594087 | 24.37186713688344 |
| Au | 13.99931223159121 | 15.98709673001115 | 24.32198142940890 |
| Au | 16.00670163880149 | 13.97264610188697 | 24.31693227980185 |
| Au | 18.05453790563780 | 16.03518841839652 | 24.10935292244874 |
| Au | 20.02614486790663 | 13.99504000448445 | 24.03111713058604 |
| Au | 11.95007164381605 | 18.03683251959201 | 24.13028617654964 |
| Au | 13.99877211699964 | 20.00610406054088 | 24.00759547216850 |
| Au | 16.05359084921448 | 18.04008625097917 | 24.10694488619545 |

## Optimized PBE atomic coordinates (in Å) of Ag<sub>161</sub>Pt<sub>40</sub> and Ag<sub>158</sub>Pt<sub>43</sub> nanoparticles presented in Figure S1

### Ag<sub>161</sub>Pt<sub>40</sub>L<sub>1</sub>-632.307

|    |                   |                   |                   |
|----|-------------------|-------------------|-------------------|
| Ag | 14.53194910265009 | 14.53163903330994 | 4.26945201897516  |
| Ag | 12.49991653022300 | 6.37590997410565  | 18.63909512570650 |
| Ag | 8.41248255739754  | 10.44280225967036 | 18.69181326851403 |
| Ag | 12.50017382582750 | 4.41774994861133  | 16.55347847563215 |
| Ag | 20.58209163949304 | 12.50008951670340 | 16.55393289566509 |
| Ag | 10.46788002099185 | 14.53248393489071 | 20.72942516103550 |
| Ag | 10.46766056740267 | 18.57579101719195 | 16.57953584257669 |
| Ag | 20.62231049813733 | 14.48012446700583 | 14.51752626594360 |
| Ag | 20.62214009553045 | 10.52001320961134 | 14.51797316116372 |

Ag 10.46859360770162 14.53153174882850 4.26866788940089  
 Ag 10.44290621421287 8.41271280065413 18.69199832866594  
 Ag 4.37751468831616 14.47993924146297 14.51700875243941  
 Ag 14.53194302987791 6.42439261658444 16.58084221710018  
 Ag 6.42417090968417 10.46802062133916 16.58039677531274  
 Ag 12.50011317791372 6.37584195931005 6.36166585590047  
 Ag 14.55743890997547 16.58756204857787 18.69082776182318  
 Ag 14.47990116751587 4.37728258648144 10.48325150087007  
 Ag 6.41014632263652 8.44525163371843 14.55361579627702  
 Ag 14.53201183695389 6.42414977962247 8.42028101740282  
 Ag 10.51988465607936 20.62250783605650 10.48221337337783  
 Ag 8.44499825755653 6.40970730845513 10.44653068837584  
 Ag 10.44288085314689 16.58721565300863 6.30781376874589  
 Ag 18.58975956450150 8.44532474016720 14.55421291513068  
 Ag 14.47991938816712 20.62269880680313 14.51715681336884  
 Ag 6.42418675052339 14.53206836429418 8.41885205663879  
 Ag 6.41045424398007 6.41008806354968 12.50023188916277  
 Ag 8.44499984017392 18.59034088539866 14.55321509173960  
 Ag 18.58952447862927 6.41023204632636 12.50044255262544  
 Ag 6.37575793563127 12.50003523740095 6.36048679675067  
 Ag 18.58967762629414 16.55492837671499 14.55353286714344  
 Ag 16.54605351027175 8.45387221336406 16.58595985149143  
 Ag 6.42430607179980 10.46791413802611 8.41926945103453  
 Ag 6.41025833716781 16.55483210056994 10.44603854703294  
 Ag 16.54631983102596 16.54618043361562 16.58503025913840  
 Ag 14.53202713189095 18.57588264256198 16.57981649642774  
 Ag 16.55520016286361 6.40974840433244 10.44676039919183  
 Ag 12.49997251997099 4.37720361921115 12.50067008659976  
 Ag 10.52001677023337 20.62280663080784 14.51695577561942  
 Ag 14.48015986335910 4.37745506958576 14.51781453169303  
 Ag 12.50033298840011 12.49947362583744 4.15304443472627  
 Ag 8.44499735893910 18.59025370846922 10.44586422107155  
 Ag 10.46796344464671 6.42419572094400 8.42010757131362  
 Ag 12.50008843683973 20.62312870058920 12.49940561404807  
 Ag 18.58970229850265 8.44512898112056 10.44681924371331  
 Ag 10.44288080385542 8.41244136849685 6.30892263446595  
 Ag 16.55515593059205 6.41003084287600 14.55415872278467  
 Ag 14.53223349088189 10.46767046828728 4.27038656066082  
 Ag 14.55727143479793 8.41248720691558 6.30923561585183  
 Ag 18.58948566009601 18.59001933878776 12.49989136958957  
 Ag 6.41018902818230 16.55480963454281 14.55311778207259  
 Ag 16.55509234394480 18.59026405286766 14.55356607118802  
 Ag 18.57582927654950 14.53189750191455 8.41937462946685  
 Ag 10.46805527440828 10.46831709194665 20.73056635480977  
 Ag 6.41051677959800 8.44504372351343 10.44644378443253  
 Ag 8.45373709800537 8.45380486544320 16.58546265615499  
 Ag 18.58981234229957 16.55471861014404 10.44637418964962  
 Ag 18.62409983962528 12.50022837436449 18.63977311552268  
 Ag 14.53149138326122 14.53222370369967 20.73019751257310  
 Ag 8.41256400547154 10.44271530053513 6.30828482883522  
 Ag 14.53118373130136 10.46854306487687 20.73151194125875  
 Ag 4.37785250439494 14.47999469140229 10.48194114748904  
 Ag 16.55515578507367 18.59013281575815 10.44595641043430  
 Ag 4.37797668162005 10.51974192209328 10.48208095171638  
 Ag 12.50000159020355 18.62437345958392 18.63810484585673  
 Ag 16.58760791417456 10.44264754172280 6.30880847278838  
 Ag 8.41224266277854 14.55726814238088 18.69091144465309  
 Ag 10.44246936700957 16.58743426786251 18.69039108429206  
 Ag 20.62207315832775 10.52004346788632 10.48269341098825  
 Ag 4.37681377892496 12.50012440921564 12.49937095817588  
 Ag 14.53202821443531 18.57570184829568 8.41947371631796  
 Ag 16.58760284061020 14.55704287607481 6.30821926424242

Ag 6.41044625741510 18.59008947010299 12.49939900218962  
 Ag 6.37538416274877 12.49998171536573 18.63892845593123  
 Ag 18.57553952293019 10.46809014581684 16.58132208499467  
 Ag 8.44481634705689 6.40986341079358 14.55398447359407  
 Ag 4.37756175803851 10.52016352602730 14.51725546723180  
 Ag 8.45383457905785 8.45373630780531 8.41483516186143  
 Ag 10.52015131088385 4.37719612514275 10.48324290745781  
 Ag 20.62303097104822 12.49996032788739 12.50042011353104  
 Ag 16.54634900188222 16.54615176012473 8.41462102736861  
 Ag 20.62224000630780 14.47988806259271 10.48268920467055  
 Ag 16.54623734926203 8.45370065541502 8.41512106786320  
 Ag 18.62447561564956 12.49984402957371 6.36085436353399  
 Ag 18.57586890042143 10.46775569906276 8.41958803161316  
 Ag 10.51977927215142 4.37737392199930 14.51780077978020  
 Ag 18.57574258508652 14.53221365949483 16.58086009589373  
 Ag 6.42403244620690 14.53200007874899 16.58009639281105  
 Ag 8.45376619441804 16.54619132065830 8.41445907067122  
 Ag 16.58707749505054 10.44309550593435 18.69279608014108  
 Ag 14.48007246869704 20.62240206712686 10.48207913958571  
 Ag 8.41274750393755 14.55715308651350 6.30756360935733  
 Ag 14.55748454237192 16.58712475784210 6.30824514241099  
 Ag 14.55720082765392 8.41290002330595 18.69240717978827  
 Ag 10.46787340962145 6.42427963198189 16.58073810525743  
 Ag 12.49944309737097 12.50096704156075 20.84692397655691  
 Ag 16.58732141349211 14.55724707581641 18.69191640484575  
 Ag 10.46808222042229 10.46794757053095 4.26985011982462  
 Ag 10.46790203214646 18.57571778387832 8.41917811551310  
 Ag 8.45355313504638 16.54615499054791 16.58448351685739  
 Ag 12.50016245022540 18.62399717315196 6.36082952560714  
 Ag 16.54776629283677 12.50046696007366 20.64781288039988  
 Ag 12.50020133477727 8.45165115483825 4.35404372050254  
 Ag 16.54821265227238 12.49976786899762 4.35318166591583  
 Ag 12.49973983192915 8.45191298482014 20.64736771380596  
 Ag 20.58509678471771 16.54866078165377 12.50010954921102  
 Ag 12.50003364860458 20.58200630966198 8.44627911324441  
 Ag 12.49969167816924 16.54847139796756 20.64544512341196  
 Ag 12.49991068394091 4.41780955133864 8.44728154134378  
 Ag 16.54818524968871 20.58537944738865 12.49970700162640  
 Ag 20.58217735951449 12.49984078401992 8.44661092912797  
 Ag 4.41756546052649 12.50016768086490 16.55330059399385  
 Ag 8.45151901565956 20.58549982575230 12.49953041461495  
 Ag 4.41514628091224 16.54868230092680 12.49949752607025  
 Ag 12.50027734041683 16.54816825068733 4.35298514047735  
 Ag 12.4999884840437 20.58204166748586 16.55304942744937  
 Ag 8.45204433666175 12.50030331834606 20.64662754264197  
 Ag 4.41776942427727 12.49992028634450 8.44614367760635  
 Ag 16.54830280789388 4.41471835466872 12.50053098836440  
 Ag 8.45152258330429 4.41453872312039 12.50029826342200  
 Ag 20.58490570247823 8.45127687276999 12.50044982731546  
 Ag 8.45194405761646 12.50003244617872 4.35272236731297  
 Ag 4.41514422300922 8.45133753296214 12.49993853574927  
 Ag 6.43883871715494 10.50048828220120 12.49980836239778  
 Ag 12.50015689678141 16.54160038593958 12.49976972016979  
 Ag 18.56123526875696 14.49965132466678 12.50010247674017  
 Ag 16.51974813313101 16.51938063288085 12.49977500994983  
 Ag 10.49504285526100 14.50470132911933 16.66622889180690  
 Ag 8.47353652229240 12.50003857795904 16.62164003718069  
 Ag 10.49376798061513 10.49367411715300 12.50021242471302  
 Ag 12.50002998794447 12.49997655730923 16.67948914735590  
 Ag 10.49992275305894 6.43871642750338 12.50033322673431  
 Ag 12.50009900826458 12.49988425584960 12.49990518984248  
 Ag 14.50644373959686 14.50622949244903 12.50004023835853

|    |                   |                   |                   |
|----|-------------------|-------------------|-------------------|
| Ag | 12.49999356320871 | 8.45827611552037  | 12.50045162372381 |
| Ag | 14.50630884818588 | 10.49376706282382 | 12.50003085959383 |
| Ag | 14.50497652637027 | 10.49516223703476 | 8.33369818074551  |
| Ag | 14.50007815343451 | 6.43874046811406  | 12.50049309516595 |
| Ag | 12.50013148646010 | 12.50015812027931 | 8.32054873586261  |
| Ag | 10.50002093732919 | 18.56120846763428 | 12.49971500195527 |
| Ag | 12.49995119240271 | 8.47385767016803  | 16.62207392447777 |
| Ag | 16.54172142363078 | 12.50002934800675 | 12.50018197876675 |
| Ag | 16.52648819385472 | 12.49989152989593 | 8.37795840932416  |
| Ag | 12.49994638821459 | 16.52615820303271 | 16.62109637048274 |
| Ag | 16.52626215599496 | 12.50008157681719 | 16.62243725699420 |
| Ag | 10.49363315390793 | 14.50624738547649 | 12.49961217356049 |
| Ag | 8.47380696255450  | 12.49999821947248 | 8.37767967092508  |
| Ag | 10.49510422013767 | 10.49517014859955 | 16.66677088104268 |
| Ag | 10.49528857283277 | 14.50479150162499 | 8.33309359553146  |
| Ag | 6.43886980132809  | 14.49967518202075 | 12.49961267124556 |
| Ag | 12.50002220214688 | 16.52603940282634 | 8.37793222599780  |
| Ag | 14.50502095636450 | 14.50474377014500 | 16.66644316451196 |
| Ag | 14.50007530194808 | 18.56112703035922 | 12.49969849460290 |
| Ag | 14.50475766567836 | 10.49514732561203 | 16.66706042635284 |
| Ag | 18.56106053451984 | 10.50040798208335 | 12.50041901614341 |
| Ag | 16.51932429145490 | 8.48075932370246  | 12.50044509028777 |
| Ag | 10.49514643051410 | 10.49520856573023 | 8.33340490214266  |
| Ag | 8.48041916921920  | 16.51940827116755 | 12.49966399690808 |
| Ag | 8.48066140937073  | 8.48061324137415  | 12.50019126475221 |
| Ag | 14.50500647691747 | 14.50471792536519 | 8.33329228956940  |
| Ag | 12.49998179078537 | 8.47380211279132  | 8.37894398449864  |
| Ag | 8.45834672824662  | 12.50013474961117 | 12.49996149901103 |
| Pt | 14.47174566909354 | 12.50012071444277 | 14.58627921669224 |
| Pt | 16.48532979221644 | 14.50545454678353 | 10.42249220980031 |
| Pt | 18.54901626152069 | 12.50000827165925 | 10.42230276535247 |
| Pt | 8.51484318770677  | 10.49437851273656 | 14.57757387295411 |
| Pt | 6.45097898892124  | 12.50002192575717 | 10.42176736458743 |
| Pt | 12.49992310573280 | 14.49468401155758 | 18.77821805092912 |
| Pt | 14.49471362871071 | 12.50005973306864 | 6.22127650054588  |
| Pt | 14.49440229484402 | 12.49995369091768 | 18.77923935029672 |
| Pt | 12.49989239565052 | 10.52849080914878 | 14.58641739047095 |
| Pt | 12.49995262629463 | 6.45099987430943  | 10.42279340890671 |
| Pt | 12.50025302074627 | 14.47147066296672 | 14.58578947648000 |
| Pt | 10.49407023502295 | 16.48503159597340 | 10.42238192579624 |
| Pt | 18.54901077003228 | 12.50004350280313 | 14.57834648113474 |
| Pt | 10.49418156948894 | 16.48511456631946 | 14.57699786509150 |
| Pt | 10.52857663646266 | 12.49976237702253 | 14.58607024595979 |
| Pt | 10.50536313530043 | 12.49991240150218 | 18.77853557293107 |
| Pt | 14.50597356628148 | 16.48517486971448 | 10.42249628932669 |
| Pt | 6.45078678909690  | 12.50005739903492 | 14.57750345349752 |
| Pt | 14.50584252785275 | 8.51493511267242  | 14.57773824515673 |
| Pt | 12.49994629921827 | 18.54897286996228 | 10.42196725931353 |
| Pt | 14.50591395874305 | 8.51490232236950  | 10.42311139826192 |
| Pt | 10.49416351141055 | 8.51493960184646  | 10.42294477449552 |
| Pt | 12.50003160179196 | 14.49438561247013 | 6.22087207492884  |
| Pt | 12.49986463676291 | 14.47144492693256 | 10.41390121060135 |
| Pt | 16.48512030418865 | 14.50556380299201 | 14.57754711140201 |
| Pt | 12.49991099481945 | 18.54898359062880 | 14.57722415941594 |
| Pt | 12.50006334297083 | 10.50567241653731 | 18.77923328589580 |
| Pt | 16.48529859693563 | 10.49444114846409 | 14.57795961644489 |
| Pt | 14.47149766551244 | 12.49988088546465 | 10.41392742342381 |
| Pt | 10.49405969897547 | 8.51506050676967  | 14.57751440779218 |
| Pt | 8.51468335492726  | 14.50546854665787 | 14.57720018209861 |
| Pt | 12.49993522522063 | 10.50541379719409 | 6.22142383913007  |
| Pt | 10.50542039499835 | 12.50007428303707 | 6.22097311554124  |
| Pt | 12.50020430152928 | 10.52858990167277 | 10.41420559885688 |

|    |                   |                   |                   |
|----|-------------------|-------------------|-------------------|
| Pt | 12.49991513183552 | 6.45105287745704  | 14.57823099661832 |
| Pt | 8.51476919142367  | 10.49446263392061 | 10.42242612271156 |
| Pt | 8.51492678917416  | 14.50553731370678 | 10.42225131550659 |
| Pt | 16.48517118519241 | 10.49430934828688 | 10.42272174668982 |
| Pt | 14.50594242391553 | 16.48504921495693 | 14.57705444447911 |
| Pt | 10.52861137193311 | 12.50028177791130 | 10.41386967786588 |

**Ag<sub>161</sub>Pt<sub>40</sub>LEH-633.801**

|    |                   |                   |                   |
|----|-------------------|-------------------|-------------------|
| Ag | 20.48964668351552 | 8.54420556574566  | 12.51090955148534 |
| Ag | 16.43573318035360 | 12.55444452608004 | 4.46521956876841  |
| Ag | 10.43876839953160 | 4.43631580818169  | 10.50472225418965 |
| Ag | 18.59478168608337 | 16.72674031213704 | 14.62371703678675 |
| Ag | 10.30598649281587 | 18.79529838790009 | 8.37740959945793  |
| Ag | 18.59808171339988 | 14.63854455382477 | 16.61040202626096 |
| Ag | 14.50045671273806 | 6.50227724309892  | 16.55877739515491 |
| Ag | 16.50562534740690 | 20.73377562841173 | 12.53188492128669 |
| Ag | 8.42191350232702  | 8.59531117816150  | 8.50934557441481  |
| Ag | 10.44460896501010 | 6.56432665167637  | 8.49931892102069  |
| Ag | 16.44749195721730 | 8.59104018118591  | 16.54059170333557 |
| Ag | 12.43432703299185 | 18.69330569936864 | 6.43450633367026  |
| Ag | 10.40922535694532 | 18.70403119009543 | 16.56345861285595 |
| Ag | 16.50771418090486 | 14.60061051993947 | 18.59370795993673 |
| Ag | 14.48654111067087 | 8.51905116732335  | 6.44028602814645  |
| Ag | 18.48980804692971 | 12.54420407254686 | 6.45799673750189  |
| Ag | 20.48560946085776 | 12.55112917764572 | 8.50988363131789  |
| Ag | 12.45529005877343 | 4.49866771843957  | 16.55623952295364 |
| Ag | 10.41766110641414 | 16.61161939154423 | 18.60293380599834 |
| Ag | 16.50610075803426 | 16.64997031427401 | 16.57769855727756 |
| Ag | 18.45606004663790 | 6.51012810793257  | 12.52506731073091 |
| Ag | 8.37229471669705  | 18.69530616862381 | 14.58126500231336 |
| Ag | 8.37492284596588  | 10.49971332862509 | 6.38889265826038  |
| Ag | 8.38086106225086  | 10.51989629805078 | 18.62373425210067 |
| Ag | 12.46611227493336 | 4.35084935411576  | 12.51474053994908 |
| Ag | 14.48932090070593 | 10.52739652273650 | 20.71100864165806 |
| Ag | 10.41921279611910 | 20.83539223083343 | 14.54528952868637 |
| Ag | 6.25278609543618  | 16.70315886892637 | 14.63022527234106 |
| Ag | 12.46838885425758 | 8.50986463479645  | 20.63031224652036 |
| Ag | 20.56512914825008 | 10.54280813897746 | 14.51750915327980 |
| Ag | 6.30700225406602  | 10.50528045250466 | 8.44810059827227  |
| Ag | 6.29528748565011  | 14.64937664620339 | 8.40883303493982  |
| Ag | 4.31927185176087  | 8.49528603787402  | 12.51232920401239 |
| Ag | 12.47103787938023 | 12.55296539082445 | 20.83791587122556 |
| Ag | 10.43471293758247 | 4.41664724122246  | 14.53236134204904 |
| Ag | 12.45217906198676 | 6.55966562221696  | 6.48501453163905  |
| Ag | 18.48863592363337 | 8.51918577071363  | 10.49759533651530 |
| Ag | 16.48408630293265 | 14.60941541368859 | 6.47071050415650  |
| Ag | 8.38156178586287  | 20.70879637115698 | 12.53755991887691 |
| Ag | 6.29596994934619  | 16.68499845182427 | 10.43211348659429 |
| Ag | 14.48303244911219 | 4.40963059967108  | 14.54014667913135 |
| Ag | 10.44977627180329 | 14.54689666058339 | 20.68338545367741 |
| Ag | 14.47350459026031 | 14.58186720953464 | 4.44257089482723  |
| Ag | 8.39907489655366  | 14.59953537693732 | 18.58362823782484 |
| Ag | 4.29786020653646  | 12.54988883834809 | 16.56844784724614 |
| Ag | 10.41975892704577 | 8.53524191717888  | 18.61047133360141 |
| Ag | 8.33724957195722  | 14.64586036325075 | 6.38329345262705  |
| Ag | 14.47629388619127 | 10.52026619659935 | 4.38290116125738  |
| Ag | 10.41969063315721 | 6.51015338784261  | 16.55347655759910 |
| Ag | 16.60638611551656 | 18.81541460976674 | 14.66788539357644 |
| Ag | 18.53896016906956 | 18.70500263738506 | 12.53216338225880 |
| Ag | 8.38287462956068  | 12.57046732174951 | 20.61752782189773 |
| Ag | 12.46520725831710 | 16.60422636356360 | 20.61429173080342 |
| Ag | 16.46253528410093 | 6.53831427923828  | 14.52908426851610 |



Ag 4.32010537592230 12.53787101400676 8.46003372808361  
 Ag 14.49117254322867 16.61897177491289 18.58981693901229  
 Ag 4.22803821149946 10.52740378066107 14.53260515690239  
 Ag 18.56643129826175 12.54428990372239 18.62620364765905  
 Ag 14.55792911220551 16.76296447237426 6.36851164751436  
 Ag 6.32325468006115 8.51580342909064 14.56509289869398  
 Ag 10.43685185865578 8.57271803510619 6.45194305816160  
 Ag 20.49999190361801 14.57455764686931 10.50305187658616  
 Ag 12.44923898700849 18.68808589529477 18.62933776517179  
 Ag 14.48355461681590 4.40774138731831 10.49224875874233  
 Ag 12.44142181169125 20.71126454986887 8.48086574591076  
 Ag 20.61101951317156 14.59362069557499 14.55336287053238  
 Ag 16.58952234689765 18.83501396363720 10.40305408280955  
 Ag 12.45522070212792 4.50054899574140 8.48773602296561  
 Ag 8.41299185001375 12.54520960982144 4.41386388764583  
 Ag 8.41387301440880 4.49339491717055 12.52439215883011  
 Ag 14.49893862540164 20.83234721720084 10.47745281740843  
 Ag 14.46630211994106 6.54584480119850 8.51092575006606  
 Ag 14.56948371236664 18.82811245153886 8.38569189917731  
 Ag 16.48934172217217 10.51341382014755 6.43707800821503  
 Ag 18.47718932341222 8.56983034071737 14.51994202167614  
 Ag 12.44752944437716 18.77590716784082 10.51705941487569  
 Ag 12.45980756409895 6.47456861848387 18.61659396377768  
 Ag 12.43926274462201 20.70413301726146 16.57063718588842  
 Ag 10.41654674867846 14.57930301053190 4.36822073195283  
 Ag 10.34777863583746 16.70116267376369 6.37894138868763  
 Ag 8.40335635843505 6.50556098844156 14.55580763488304  
 Ag 16.47723498653452 8.54664834376851 8.48857836758592  
 Ag 14.49272434144171 20.80047832133411 14.56876814720276  
 Ag 16.48874810187546 4.43790088018998 12.52527205212713  
 Ag 20.59694947731135 12.55173611380606 12.49875205616535  
 Ag 18.56885468809338 10.50534527462654 16.61724559995512  
 Ag 8.30901835371506 18.75956359558114 10.42634566241588  
 Ag 14.54891006165264 18.78419463658685 16.63337752284379  
 Ag 4.24422180507395 14.57381916078760 14.54605456188799  
 Ag 18.58619818528939 16.76720326827988 10.41684383347253  
 Ag 12.45709730526077 20.94834387272086 12.52342195074705  
 Ag 18.51643497760347 10.51212384309965 8.45626684304709  
 Ag 4.33702465758813 16.59884913263597 12.51362127807474  
 Ag 16.52234847300776 10.50430898697041 18.64588135900421  
 Ag 14.48392680013727 14.56675667297146 20.68459995186693  
 Ag 12.47562741307809 12.54530457406280 4.32116076538092  
 Ag 6.34109623883743 12.53266799416511 6.41216463543273  
 Ag 6.34028534065670 6.46623035821301 12.52088621827553  
 Ag 20.52856917265123 10.53579366078777 10.50911317793000  
 Ag 6.33463080899733 18.67985492605118 12.53080432503388  
 Ag 14.50372047138964 8.52115518699225 18.62647109290313  
 Ag 16.45747881685003 6.52042654807728 10.50305714846054  
 Ag 6.26963976014665 14.64856130257209 16.61790504314989  
 Ag 6.32230449081759 12.54792421112903 18.62030760840150  
 Ag 16.56453841868032 16.78113229298918 8.40007510484227  
 Ag 20.52568511628351 16.61405968801825 12.52378063261532  
 Ag 8.43999084832505 8.59552335640962 16.52846047072062  
 Ag 18.47953009661400 14.60169279110727 8.48244590493866  
 Ag 8.42709706678157 16.60017232516329 16.53017560024118  
 Ag 4.27323600809543 14.57954251611637 10.47969065033278  
 Ag 4.10390460171377 12.55731091734208 12.51496670861093  
 Ag 12.46217636805898 8.52214508522614 4.38553309668844  
 Ag 10.44452525558238 10.55849288091712 20.68469140361285  
 Ag 12.44660102455554 16.60973693765579 4.44227357675971  
 Ag 10.40262486715100 20.77570584254052 10.50694901219443  
 Ag 8.41110988792260 6.51542774699563 10.47777673154177

Ag 4.21916081528140 10.51898406550881 10.49639968268442  
 Ag 20.57094432911882 12.54782844720748 16.56296301563447  
 Ag 10.42322333185211 10.51824639425448 4.30420031343023  
 Ag 6.30971988798530 10.51768538887167 16.58702951797570  
 Ag 8.32612811608739 16.70576619302643 8.41069980578034  
 Ag 16.52156501385695 12.55647553456761 20.62629773704844  
 Ag 8.38819517089153 12.57850055490767 16.55428798034541  
 Ag 10.42265065175619 18.74424380863656 12.53987798002880  
 Ag 10.43918605640757 6.52188472100871 12.51827607254652  
 Ag 14.45907379946611 6.51182159724499 12.51734293687193  
 Ag 18.55438764146089 12.56335744361617 14.54900723283360  
 Ag 8.37828563634723 12.57677490021487 8.45869478984261  
 Ag 10.41140883057768 16.69575954696468 10.48617918767265  
 Ag 12.46286779713872 8.55358263838044 16.55388629711306  
 Ag 14.47071433751254 16.71967684127656 10.49744410008869  
 Ag 8.38528483009271 8.55748327669296 12.51180874500762  
 Ag 8.37512367141251 14.59932727542102 14.51308949223329  
 Ag 14.46759090088775 12.55427210839883 18.62195547947091  
 Ag 10.41892828593844 12.54814432017474 6.41129828304804  
 Ag 16.50199422544981 14.62600046327882 14.52844942600165  
 Ag 12.45947775324156 14.55815145004596 18.61659687767590  
 Ag 12.44782395542665 16.70000848114020 8.44989151704585  
 Ag 14.47461554702906 18.78480226246220 12.52390918383896  
 Ag 8.37435233702423 14.60829281598177 10.50831599461307  
 Ag 6.29470709076277 12.55360042138192 14.53063885736709  
 Ag 6.31122289709225 10.55530775569760 12.51404351274962  
 Ag 12.46170804198339 16.65584022398607 16.56024505373748  
 Ag 12.45874329305346 6.51519549897320 14.51760111762045  
 Ag 14.47470642357342 16.68359976698316 14.53006910629367  
 Ag 6.29986038305028 12.55232670051434 10.50398293039464  
 Ag 12.44783323037978 18.75562756078583 14.51641385879312  
 Ag 6.29536583896584 14.57002713057067 12.52187323779725  
 Ag 12.45620585290602 10.56736490562082 6.42405155217948  
 Ag 16.50073551382071 12.57544001594752 16.56438430281395  
 Ag 10.44122487564483 12.56905059547481 18.60893955571098  
 Ag 6.32316643209423 8.51280659025008 10.46828386500157  
 Ag 8.37994580543662 16.65852528856286 12.52463443919209  
 Ag 16.49515365850420 14.64877716237567 10.50334878476232  
 Ag 12.45551992520314 6.52810173907054 10.52512980591523  
 Ag 12.44886801577810 14.57820416484839 6.41714284990459  
 Ag 18.53997255283347 14.60993131651852 12.53016830895224  
 Ag 10.42569205659737 14.62077033006695 8.46228672655341  
 Ag 16.51241198988466 16.70567721236746 12.51542810268945  
 Ag 12.46264406128651 10.57222200050834 18.61916546372467  
 Ag 14.45984511302228 14.64740959293839 8.47643236543832  
 Pt 10.45801336581706 10.60685166250550 16.53311379355454  
 Pt 12.45537855012849 12.56928700993665 16.47114613352531  
 Pt 12.43521253041777 14.62171036366233 14.49594199760809  
 Pt 14.45290560460064 12.61414291815853 14.48706401197136  
 Pt 10.46129019083331 14.60814106164751 12.51821495257817  
 Pt 10.47528195947327 16.62743138728958 14.50298230918362  
 Pt 12.42279171247468 10.60634415197430 10.51423571603002  
 Pt 12.47170753502671 8.63438009009922 8.53558924822520  
 Pt 16.46394792505034 12.59191747244141 12.51284231014790  
 Pt 14.44699926789023 10.61479839970237 16.51057699495094  
 Pt 12.45297571602704 12.58767300273182 8.52259726293081  
 Pt 14.44655327423357 8.64087212268953 14.48800673168603  
 Pt 12.43094732275816 10.58709073824131 14.52173598837442  
 Pt 10.46137500611215 12.58443133210789 10.52274348139406  
 Pt 10.47232766580067 14.57706644723918 16.51091410403166  
 Pt 16.47645826521204 10.59546708744325 10.51363086703280  
 Pt 8.39686479485496 10.59808370447470 14.53189538692541

|    |                   |                   |                   |
|----|-------------------|-------------------|-------------------|
| Pt | 16.47959213704413 | 10.60280392174228 | 14.51711425393304 |
| Pt | 18.48120111093651 | 12.54473538546004 | 10.51374966258652 |
| Pt | 8.42027534233791  | 12.56048329083322 | 12.51185300406522 |
| Pt | 14.43755051468523 | 12.58855159516547 | 10.52433914006948 |
| Pt | 18.49189240992374 | 10.59032447828989 | 12.49759537521440 |
| Pt | 10.44266841835903 | 10.61140639021432 | 8.51533683796856  |
| Pt | 12.44201708935360 | 16.63355696693178 | 12.51084870459235 |
| Pt | 10.40107796478944 | 10.61038733749213 | 12.54349576917020 |
| Pt | 16.45836996559638 | 12.54923845798759 | 8.50855874586131  |
| Pt | 14.44918350916746 | 10.62159316486086 | 12.54450111536591 |
| Pt | 10.44282617624749 | 12.57642567726269 | 14.48518800563407 |
| Pt | 14.45141626711076 | 14.62790705573133 | 12.50024794403758 |
| Pt | 10.46306930015192 | 8.64696287847722  | 10.52091447035354 |
| Pt | 12.43778193470330 | 14.64756380321246 | 10.50559665017262 |
| Pt | 10.44370984724315 | 8.61804607657356  | 14.50853615584634 |
| Pt | 14.42940972319213 | 14.57858266751057 | 16.52784407621601 |
| Pt | 8.40670873396667  | 10.61080465803305 | 10.51147852951128 |
| Pt | 14.45872579587655 | 12.54954354769453 | 6.47756742571316  |
| Pt | 12.43941105236605 | 8.61303763349768  | 12.52914984247164 |
| Pt | 12.46213534597399 | 12.62143931768964 | 12.48264829584479 |
| Pt | 16.42912377895005 | 8.62493374284524  | 12.50241345243115 |
| Pt | 14.43640508331964 | 8.66964490035535  | 10.54574262213402 |
| Pt | 14.46442690961426 | 10.60299307180019 | 8.51365663715359  |

#### **Ag<sub>158</sub>Pt<sub>43</sub>L<sub>1</sub>-645.077**

|    |                   |                   |                   |
|----|-------------------|-------------------|-------------------|
| Ag | 20.62306374032496 | 8.45077398767555  | 12.52406638551157 |
| Ag | 16.53550846631271 | 12.49281244347260 | 4.36095030643278  |
| Ag | 10.47751733632905 | 4.28424587107382  | 10.47751733632905 |
| Ag | 18.61851619182606 | 16.59344487913657 | 14.54719557978727 |
| Ag | 10.39600437934740 | 18.66331423164135 | 8.36549735091817  |
| Ag | 18.57861155184207 | 14.49529311848059 | 16.56772070471313 |
| Ag | 14.60397062065267 | 6.33668576835866  | 16.63450264908183 |
| Ag | 16.53550846631271 | 20.63904969356722 | 12.50718755652740 |
| Ag | 8.41063930357533  | 8.40916795018774  | 8.41066430357527  |
| Ag | 10.49772537538191 | 6.44247967613867  | 8.49012598713885  |
| Ag | 16.63404618847453 | 8.36595381152547  | 16.63402118847459 |
| Ag | 12.46642702119083 | 18.60955797171303 | 6.39046702828708  |
| Ag | 10.45280442021273 | 18.61854119182600 | 16.59341987913645 |
| Ag | 16.56774570471307 | 14.49529311848059 | 18.57861155184207 |
| Ag | 14.50227462461809 | 8.49012598713885  | 6.44250467613861  |
| Ag | 18.54351045333435 | 12.50000000000000 | 6.45648954666565  |
| Ag | 20.63904969356722 | 12.50718755652740 | 8.46451653368740  |
| Ag | 12.52409138551168 | 4.37693625967505  | 16.54920101232451 |
| Ag | 10.49772537538191 | 16.50987401286115 | 18.55749532386139 |
| Ag | 16.58933569642473 | 16.59083204981226 | 16.58933569642473 |
| Ag | 18.60955797171303 | 6.39044202828697  | 12.53357297880917 |
| Ag | 8.43225429528693  | 18.57863655184201 | 14.49531811848052 |
| Ag | 8.43225429528693  | 10.50470688151941 | 6.42138844815792  |
| Ag | 8.40655512086344  | 10.45282942021284 | 18.61851619182606 |
| Ag | 12.53979875051816 | 4.38697340837479  | 12.53977375051805 |
| Ag | 14.54355583553392 | 10.45644416446607 | 20.66274769618725 |
| Ag | 10.47505272343466 | 20.59767328663794 | 14.48524179049953 |
| Ag | 6.42138844815792  | 16.56774570471307 | 14.49531811848052 |
| Ag | 12.52409138551168 | 8.45077398767555  | 20.62306374032496 |
| Ag | 20.66274769618725 | 10.45644416446607 | 14.54358083553386 |
| Ag | 6.42138844815792  | 10.50470688151941 | 8.43225429528693  |
| Ag | 6.33668576835866  | 14.60397062065267 | 8.36549735091817  |
| Ag | 4.36095030643278  | 8.46451653368740  | 12.50718755652740 |
| Ag | 12.53979875051816 | 12.46022624948195 | 20.61300159162509 |
| Ag | 10.51475820950046 | 4.40232671336206  | 14.52494727656534 |
| Ag | 12.50000000000000 | 6.45648954666565  | 6.45648954666565  |
| Ag | 18.57861155184207 | 8.43225429528693  | 10.50470688151941 |

Ag 16.59344487913657 14.54717057978715 6.38148380817394  
 Ag 8.45077398767555 20.62306374032496 12.47590861448832  
 Ag 6.33668576835866 16.63450264908183 10.39602937934733  
 Ag 14.54355583553392 4.33725230381275 14.54358083553386  
 Ag 10.47751733632905 14.52248266367095 20.71575412892618  
 Ag 14.48521679049942 14.52492227656541 4.40232671336206  
 Ag 8.49012598713885 14.50227462461809 18.55749532386139  
 Ag 4.36095030643278 12.49281244347260 16.53548346631260  
 Ag 10.50468188151947 8.43225429528693 18.57861155184207  
 Ag 8.36547235091823 14.60397062065267 6.33671076835859  
 Ag 14.52248266367095 10.47751733632905 4.28424587107382  
 Ag 10.50468188151947 6.42136344815799 16.56772070471313  
 Ag 6.39072357205721 10.48123165105712 12.49307888758714  
 Ag 18.54351045333435 18.54351045333435 12.50000000000000  
 Ag 8.46449153368728 12.50718755652740 20.63904969356722  
 Ag 12.49281244347260 16.53548346631260 20.63904969356722  
 Ag 16.63452764908177 6.33668576835866 14.60399562065260  
 Ag 4.37693625967505 12.52406638551157 8.45077398767555  
 Ag 14.54717057978715 16.59344487913657 18.61851619182606  
 Ag 4.28424587107382 10.47751733632905 14.52248266367095  
 Ag 18.60955797171303 12.46642702119083 18.60955797171303  
 Ag 14.49529311848059 16.56774570471307 6.42138844815792  
 Ag 6.44250467613861 8.49012598713885 14.50229962461803  
 Ag 10.45280442021273 8.40655512086344 6.38148380817394  
 Ag 20.71575412892618 14.52248266367095 10.47751733632905  
 Ag 12.50000000000000 18.54351045333435 18.54351045333435  
 Ag 14.52494727656534 4.40232671336206 10.51478320950058  
 Ag 12.47593361448843 20.62306374032496 8.45077398767555  
 Ag 20.59767328663794 14.48521679049942 14.52494727656534  
 Ag 16.59344487913657 18.61851619182600 10.45282942021284  
 Ag 12.49281244347260 4.36095030643278 8.46451653368740  
 Ag 8.45077398767555 12.52406638551157 4.37693625967505  
 Ag 8.46449153368728 4.36095030643278 12.49281244347260  
 Ag 14.48521679049942 20.59767328663794 10.47505272343466  
 Ag 14.54717057978715 6.38145880817401 8.40655512086344  
 Ag 14.49529311848059 18.57863655184201 8.43225429528693  
 Ag 16.50987401286115 10.49772537538191 6.44250467613861  
 Ag 18.66328923164141 8.36549735091817 14.60399562065260  
 Ag 6.38148380817394 8.40655512086344 10.45282942021284  
 Ag 12.53357297880917 6.39044202828697 18.60955797171303  
 Ag 12.50721255652751 20.63904969356722 16.53548346631260  
 Ag 10.45641916446614 14.54355583553392 4.33725230381275  
 Ag 10.39600437934740 16.63450264908183 6.33671076835859  
 Ag 8.40655512086344 6.38145880817401 14.54719557978727  
 Ag 16.58933569642473 8.41066430357527 8.40914295018763  
 Ag 14.52248266367095 20.71575412892618 14.52248266367095  
 Ag 16.54922601232444 4.37693625967505 12.52406638551157  
 Ag 20.61302659162520 12.46022624948195 12.53977375051805  
 Ag 18.66328923164141 10.39602937934733 16.63450264908183  
 Ag 8.36547235091823 18.66331423164135 10.39602937934733  
 Ag 14.50227462461809 18.55752032386133 16.50984901286104  
 Ag 4.40232671336206 14.52492227656541 14.48524179049953  
 Ag 18.55749532386139 16.50987401286115 10.49772537538191  
 Ag 12.46022624948195 20.61302659162520 12.46020124948183  
 Ag 18.61851619182606 10.45282942021284 8.40655512086344  
 Ag 4.37693625967505 16.54922601232444 12.47590861448832  
 Ag 16.63452764908177 10.39602937934733 18.66331423164135  
 Ag 14.52494727656534 14.48521679049942 20.59767328663794  
 Ag 12.46022624948195 12.53977375051805 4.38697340837479  
 Ag 6.39044202828697 12.53357297880917 6.39046702828708  
 Ag 6.45648954666565 6.45648954666565 12.50000000000000  
 Ag 20.59767328663794 10.47507772343459 10.51478320950058

Ag 6.39044202828697 18.60955797171303 12.46642702119083  
 Ag 14.60397062065267 8.36549735091817 18.66331423164135  
 Ag 16.56774570471307 6.42136344815799 10.50470688151941  
 Ag 6.38148380817394 14.54717057978715 16.59341987913645  
 Ag 6.45648954666565 12.50000000000000 18.54351045333435  
 Ag 16.59085704981238 16.58933569642473 8.41066430357527  
 Ag 20.63904969356722 16.53548346631260 12.49281244347260  
 Ag 8.40914295018763 8.41066430357527 16.58933569642473  
 Ag 18.55749532386139 14.50227462461809 8.49012598713885  
 Ag 8.41063930357533 16.58933569642473 16.59083204981226  
 Ag 4.33725230381275 14.54355583553392 10.45644416446607  
 Ag 4.38699840837491 12.53977375051805 12.46020124948183  
 Ag 12.50721255652751 8.46451653368740 4.36095030643278  
 Ag 10.51475820950046 10.47507772343459 20.59767328663794  
 Ag 12.47593361448843 16.54922601232444 4.37693625967505  
 Ag 10.45641916446614 20.66274769618725 10.45644416446607  
 Ag 8.49012598713885 6.44247967613867 10.49772537538191  
 Ag 4.40232671336206 10.51478320950058 10.47505272343466  
 Ag 20.62306374032496 12.47593361448843 16.54920101232451  
 Ag 10.47505272343466 10.51478320950058 4.40232671336206  
 Ag 6.44250467613861 10.49772537538191 16.50984901286104  
 Ag 8.36595381152547 16.63404618847453 8.36595381152547  
 Ag 16.54922601232444 12.47593361448843 20.62306374032496  
 Ag 10.49662321518709 10.45296654283357 16.58130723140990  
 Ag 12.53143349820919 12.46859150179093 16.59946370452671  
 Ag 14.55036078461845 12.46508135124663 14.55036078461845  
 Ag 10.44963921538155 14.55033578461851 12.46505635124670  
 Ag 10.48120665105718 6.39069857205727 12.50692111241287  
 Ag 10.45294154283345 16.58133223140984 14.50337678481291  
 Ag 16.59948870452682 12.46859150179093 12.53140849820908  
 Ag 14.50337678481291 16.58133223140984 10.45294154283345  
 Ag 12.46859150179093 12.53140849820908 8.40051129547318  
 Ag 8.41866776859017 14.54703345716643 14.50337678481291  
 Ag 12.53494364875331 10.44966421538149 14.55036078461845  
 Ag 10.44963921538155 12.53491864875337 10.44963921538155  
 Ag 16.58133223140984 10.45296654283357 10.49662321518709  
 Ag 16.58133223140984 14.50335178481297 14.54705845716655  
 Ag 12.50694611241298 14.51876834894288 18.60927642794279  
 Ag 14.51879334894282 18.60930142794273 12.49307888758714  
 Ag 16.50987401286115 18.55752032386133 14.50229962461803  
 Ag 6.39072357205721 12.50692111241287 14.51879334894282  
 Ag 18.60927642794279 12.49307888758714 10.48120665105718  
 Ag 8.40051129547318 12.53140849820908 12.46859150179093  
 Ag 10.45294154283345 10.49662321518709 8.41866776859017  
 Ag 12.49307888758714 18.60930142794273 14.51879334894282  
 Ag 12.46859150179093 16.59946370452671 12.46859150179093  
 Ag 14.55036078461845 10.44966421538149 12.53491864875337  
 Ag 12.49307888758714 10.48123165105712 6.39072357205721  
 Ag 12.46508135124663 14.55033578461851 10.44963921538155  
 Ag 10.49662321518709 8.41866776859017 14.54705845716655  
 Ag 10.48120665105718 12.49307888758714 18.60927642794279  
 Ag 14.54705845716655 14.50335178481297 16.58130723140990  
 Ag 8.41866776859017 10.49662321518709 10.45294154283345  
 Ag 12.50694611241298 6.39069857205727 10.48120665105718  
 Ag 14.51879334894282 12.50692111241287 6.39072357205721  
 Ag 18.60927642794279 14.51876834894288 12.50692111241287  
 Ag 12.53143349820919 8.40053629547329 12.53140849820908  
 Ag 14.50337678481291 14.54703345716643 8.41866776859017  
 Ag 14.54705845716655 8.41866776859017 10.49662321518709  
 Pt 8.52968733034395 12.50000000000000 16.47028766965611  
 Pt 12.50000000000000 14.48790895258759 14.48793395258753  
 Pt 10.40423655431750 18.58549184583676 12.40743312985041

|    |                   |                   |                   |
|----|-------------------|-------------------|-------------------|
| Pt | 12.50000000000000 | 10.51209104741241 | 10.51209104741241 |
| Pt | 12.50000000000000 | 8.52971233034388  | 8.52971233034388  |
| Pt | 14.59576344568250 | 6.41450815416324  | 12.59254187014964 |
| Pt | 14.58765007162387 | 10.41237492837606 | 16.58257197692708 |
| Pt | 18.58546684583665 | 12.40743312985041 | 14.59576344568250 |
| Pt | 8.43377906548960  | 12.60174163834615 | 8.43377906548960  |
| Pt | 10.41234992837612 | 16.58259697692702 | 10.41237492837606 |
| Pt | 12.60176663834609 | 8.43380406548954  | 16.56619593451046 |
| Pt | 8.52968733034395  | 8.52971233034388  | 12.50000000000000 |
| Pt | 14.58765007162387 | 8.41740302307298  | 14.58765007162387 |
| Pt | 14.59576344568250 | 12.40743312985041 | 18.58549184583676 |
| Pt | 10.40423655431750 | 12.59256687014958 | 6.41453315416335  |
| Pt | 10.50401939655908 | 14.49595560344099 | 16.46994630491979 |
| Pt | 12.39825836165385 | 16.56619593451046 | 8.43377906548960  |
| Pt | 8.41740302307298  | 14.58762507162394 | 10.41237492837606 |
| Pt | 8.53005369508022  | 10.50404439655902 | 14.49598060344093 |
| Pt | 16.58259697692702 | 10.41237492837606 | 14.58765007162387 |
| Pt | 12.50000000000000 | 16.47028766965611 | 16.47028766965611 |
| Pt | 12.59256687014958 | 6.41450815416324  | 14.59576344568250 |
| Pt | 14.48793395258753 | 12.50000000000000 | 10.51209104741241 |
| Pt | 18.58546684583665 | 10.40423655431750 | 12.59254187014964 |
| Pt | 14.49598060344093 | 16.46994630491979 | 14.49598060344093 |
| Pt | 6.41453315416335  | 12.59256687014958 | 10.40423655431750 |
| Pt | 10.51206604741247 | 10.51209104741241 | 12.50000000000000 |
| Pt | 16.47028766965611 | 12.50000000000000 | 8.52971233034388  |
| Pt | 6.41453315416335  | 14.59576344568250 | 12.40743312985041 |
| Pt | 10.51206604741247 | 12.50000000000000 | 14.48793395258753 |
| Pt | 14.48793395258753 | 14.48790895258759 | 12.50000000000000 |
| Pt | 10.50401939655908 | 8.53005369508022  | 10.50401939655908 |
| Pt | 16.56622093451040 | 12.39825836165385 | 16.56619593451046 |
| Pt | 12.40745812985035 | 18.58549184583676 | 10.40423655431750 |
| Pt | 8.43377906548960  | 16.56619593451046 | 12.39823336165391 |
| Pt | 16.46994630491979 | 14.49595560344099 | 10.50401939655908 |
| Pt | 12.40745812985035 | 14.59576344568250 | 6.41453315416335  |
| Pt | 10.41234992837612 | 14.58762507162394 | 8.41740302307298  |
| Pt | 12.50000000000000 | 12.50000000000000 | 12.50000000000000 |
| Pt | 16.47028766965611 | 16.47028766965611 | 12.50000000000000 |
| Pt | 12.59256687014958 | 10.40423655431750 | 18.58549184583676 |
| Pt | 16.56622093451040 | 8.43380406548954  | 12.60174163834615 |
| Pt | 14.49598060344093 | 10.50404439655902 | 8.53005369508022  |

**Ag<sub>158</sub>Pt<sub>43</sub>LEH-643.158**

|    |                   |                   |                   |
|----|-------------------|-------------------|-------------------|
| Ag | 20.58764744391275 | 8.55246668122098  | 12.44401054320540 |
| Ag | 16.55656880678965 | 12.56942483862210 | 4.27910037727890  |
| Ag | 10.49461936605925 | 4.44863472086443  | 10.39411841970069 |
| Ag | 18.67968763743974 | 16.75923306876269 | 14.57430097055317 |
| Ag | 10.44794203479764 | 18.69130237204742 | 8.37223826998108  |
| Ag | 10.48409593352481 | 18.69702663219499 | 12.43159351562613 |
| Ag | 18.56582331620912 | 14.57936249248125 | 16.48554472828827 |
| Ag | 10.47263913260777 | 6.48865888470489  | 12.42182646940562 |
| Ag | 10.49238716909000 | 16.65340549965776 | 14.46146257245299 |
| Ag | 14.50866661760766 | 6.55436315581300  | 16.44929224093534 |
| Ag | 16.54561762205646 | 20.68127701647773 | 12.44272186099998 |
| Ag | 8.39806575024595  | 8.46818621032936  | 8.28685822922461  |
| Ag | 12.52802509794762 | 8.55496390052030  | 8.35054937017310  |
| Ag | 10.41493740968293 | 6.43788999017672  | 8.27006225601112  |
| Ag | 16.56503234590713 | 8.51523647259356  | 16.49704206929357 |
| Ag | 12.48827767676080 | 18.66693695462386 | 6.32483288055164  |
| Ag | 10.40378971410648 | 18.78244982796658 | 16.56443189659122 |
| Ag | 8.46759534629988  | 12.58026173952925 | 8.36532720478562  |
| Ag | 16.56446830154495 | 14.58985298854849 | 18.52008802095088 |
| Ag | 14.62589379359179 | 8.46337426241207  | 6.17498497148062  |

Ag 18.60056976438452 12.56136246490751 6.31233372935051  
 Ag 20.59661723929439 12.55122661589428 8.38140882463119  
 Ag 12.50504724012958 4.53511749639314 16.38866723678268  
 Ag 10.40173774464551 16.70495401654441 18.58892395443729  
 Ag 16.62069557289343 16.74278914581028 16.56477695522814  
 Ag 18.57085669423732 6.52385848755776 12.42619178078998  
 Ag 8.44760345324495 18.71256508716001 14.47996068667156  
 Ag 8.38839980862428 10.49608655349145 6.25033381550263  
 Ag 8.43096509263816 10.51001675587258 18.45986081617935  
 Ag 12.52350039544943 4.44390539128095 12.42838851379040  
 Ag 14.54491184980644 16.64949925085157 10.40898662684424  
 Ag 14.49078653974479 10.52749425454516 20.54563950589269  
 Ag 10.47625224352778 20.79546233224082 14.47090512565778  
 Ag 6.48359706889794 16.63628485544988 14.45822500686473  
 Ag 8.43416837762597 8.50221003785560 12.42607672148717  
 Ag 12.48499988236953 8.54166639801575 20.44687686995173  
 Ag 20.61309770433443 10.52581089809595 14.45175943360122  
 Ag 14.52758400153337 12.54734091937328 18.50151223156963  
 Ag 6.36738511780464 10.49316059362772 8.31329029492222  
 Ag 10.50441803982106 12.58890875949638 6.27479904115634  
 Ag 6.42204119925849 14.62815836750880 8.35039139078734  
 Ag 10.49780715940904 14.61197814110729 16.45995347744058  
 Ag 4.38193484831966 8.48240957366814 12.44701919119579  
 Ag 12.49212941802929 12.53462438620496 20.59326286091360  
 Ag 10.50621802612511 4.45630680918913 14.41938234200972  
 Ag 12.51551725319430 6.51269348610106 6.30594490527986  
 Ag 18.55936201016662 8.57464824822692 10.41753800126449  
 Ag 16.58741791396265 14.63499763289373 14.45576752066068  
 Ag 12.50067269015855 14.58585762120639 18.53473622403166  
 Ag 16.62076527391569 14.66165917388362 6.25296312912193  
 Ag 8.48737930975377 20.73242599239894 12.43164834865594  
 Ag 12.49127907148958 16.62759097691497 8.37948224490475  
 Ag 6.46368984546699 16.59783472733971 10.40208975252194  
 Ag 14.50763734431799 4.53132944028212 14.41995089146762  
 Ag 10.45516465326434 14.57983002240357 20.58817764684014  
 Ag 14.51043514642583 18.74288926589978 12.44663494411157  
 Ag 14.52143854456595 14.59548580064219 4.22252608587807  
 Ag 8.44997860567907 14.59614812437277 18.51580997354148  
 Ag 4.44024283374093 12.55982862830106 16.39480514938985  
 Ag 10.48136904988020 8.54843132447808 18.41477194349847  
 Ag 8.46876366682256 14.61477913658164 6.30013726046972  
 Ag 14.55082164231754 10.53134455045022 4.15962766590214  
 Ag 10.50640432828189 6.56130377147540 16.37967442934427  
 Ag 16.64657869632247 18.80320973330464 14.57208843674306  
 Ag 6.40003030092982 10.52098529007194 12.44463979863348  
 Ag 12.51050044421742 16.66589283757635 16.49703417946153  
 Ag 18.60017302432660 18.67537766973651 12.44533984721552  
 Ag 18.61391987581635 12.54816628221348 10.40654384250106  
 Ag 8.46422441332392 12.53479059977026 20.50423005131904  
 Ag 12.49300908405391 16.58237265555127 20.51805141380554  
 Ag 16.55471442357462 6.54338650415047 14.45870560955988  
 Ag 4.41872807363394 12.57610291731118 8.39500037612241  
 Ag 10.49348926631120 10.55415268070417 8.32909889247314  
 Ag 14.60132690710018 16.68865539417422 18.58759203052480  
 Ag 4.36199659205876 10.53087727875154 14.43729264993077  
 Ag 14.53983330321217 16.68381374520524 14.45896475480276  
 Ag 6.42274930991043 12.57804555720889 10.41818490738272  
 Ag 18.54853831674976 12.53204769151447 18.51294873317826  
 Ag 12.50071504347149 18.75650517874595 14.45618869719879  
 Ag 14.57963466537396 16.67158451249253 6.27760054814247  
 Ag 6.35916236883688 8.44652148179622 14.49795694854341  
 Ag 10.41438743550827 8.46937213049989 6.22544533342329

Ag 16.57672856102893 12.56246015396619 8.35119138618917  
 Ag 20.67357251521219 14.57234487703712 10.41784363392961  
 Ag 12.50613922392016 18.67629526607413 18.53815296533796  
 Ag 14.52304533710616 4.51507677382267 10.42908407542129  
 Ag 12.49613377238846 20.68591230492957 8.38331151904035  
 Ag 20.59988352150663 14.57344596921038 14.47527747916162  
 Ag 16.62977155206001 18.74481631938848 10.32358134457445  
 Ag 12.52331778618909 4.51958375452057 8.37135809768871  
 Ag 8.45007596483520 12.58031699960868 4.29426190233986  
 Ag 8.46289573088410 4.46360000348326 12.42310868675377  
 Ag 14.51665768019886 20.74568993844991 10.40908358946101  
 Ag 14.56943794828926 6.54007352014902 8.33277961199794  
 Ag 10.47038822419027 8.51204770334822 10.36634052739463  
 Ag 14.57753021955371 18.70740733774561 8.32507032371640  
 Ag 16.62997909883295 10.46398209638959 6.18805379283203  
 Ag 12.52339110404315 10.57624425171982 6.23574171734685  
 Ag 10.48297590722751 12.55514170833881 18.47880487649208  
 Ag 18.57446125735578 8.51587321187255 14.46772353244539  
 Ag 12.47991359469125 18.70569532370025 10.42460376474561  
 Ag 6.36247665565229 8.45332042921113 10.35236149721038  
 Ag 12.48588300226812 6.53202333917709 18.42730099040003  
 Ag 12.51352204091629 20.71739453705458 16.49458540031625  
 Ag 10.49881371763484 14.56998037650511 4.15595521816462  
 Ag 14.53954924172807 14.61710517263191 16.48982468696820  
 Ag 10.46048320933442 16.61816576186291 6.30728592414749  
 Ag 8.40643375300712 6.43712514420879 14.48535694370699  
 Ag 16.52558877124330 8.58045833909637 8.35807300260719  
 Ag 14.54755191760109 20.80877050669030 14.48878924282661  
 Ag 16.52044786396009 4.55991658723628 12.43072234789122  
 Ag 20.68226406090963 12.54175920057247 12.46187676638958  
 Ag 18.59367113609625 10.50536134860654 16.50820581229203  
 Ag 8.43566041950544 10.53864173264222 10.37833971876388  
 Ag 8.48151366336450 18.66515817510870 10.39774692124355  
 Ag 14.61429419925683 18.79037142166089 16.57280593895673  
 Ag 4.42950392827857 14.59529951803159 14.43319090851463  
 Ag 16.59199823800832 14.60875741495475 10.40808537274092  
 Ag 18.66054024336620 16.68636191149248 10.34133480117098  
 Ag 12.52800742280536 6.52069998176798 10.39102276388900  
 Ag 12.49613930223041 20.90729197615318 12.44749324017106  
 Ag 14.52502088466299 12.56833081142395 6.24292761489240  
 Ag 12.49468585275831 14.57983631996983 6.27978205190434  
 Ag 18.62834478530978 14.59029579908877 12.44356634496690  
 Ag 18.60582489952930 10.50042549713199 8.31854205358223  
 Ag 4.47994994465720 16.61110475028303 12.44391627840037  
 Ag 16.56489442361911 10.50550183815435 18.52990381561612  
 Ag 14.52775214886839 14.56757288688130 20.58837047059688  
 Ag 12.51890456075940 12.56105305601461 4.03880039320392  
 Ag 6.40049508909526 12.56826653630883 6.30679101767516  
 Ag 6.39186909049015 6.44013247972578 12.44180765392302  
 Ag 20.63111622880784 10.54582844170791 10.43674716098331  
 Ag 6.46931216287049 18.67157995234652 12.42666563764601  
 Ag 14.50751089233598 8.55282708200036 18.45413118927953  
 Ag 16.51722221755157 6.58436567292830 10.41523516170433  
 Ag 6.47637250026536 14.58586710690687 16.45251340546326  
 Ag 6.45616560825682 12.54030226374007 18.44477395724676  
 Ag 16.62530342441258 16.68788611335520 8.30380531769294  
 Ag 20.60233527043530 16.60391164023589 12.45395072458794  
 Ag 8.45786847264885 8.52812058580621 16.40273483066389  
 Ag 18.66261393574488 14.66064893521282 8.30573654215877  
 Ag 8.44964099340553 16.66573728963565 16.51262659064667  
 Ag 16.58773472483559 16.67540478948019 12.44205193358515  
 Ag 4.40730845796481 14.57988638109377 10.45500318277539



|    |                   |                   |                   |
|----|-------------------|-------------------|-------------------|
| Ag | 4.34583067111111  | 12.57088742989459 | 12.45000352203749 |
| Ag | 12.50501427957751 | 8.54053676804012  | 4.27315308228949  |
| Ag | 14.54256165369143 | 14.59623725466264 | 8.34822607666837  |
| Ag | 10.48734602623957 | 10.52595630830142 | 20.49361352021583 |
| Ag | 12.48844362066127 | 16.61367262439108 | 4.29337461535683  |
| Ag | 10.49359859745367 | 20.81999126080718 | 10.41832956792332 |
| Ag | 8.39012904304421  | 6.43008456902671  | 10.32950131813852 |
| Ag | 4.36238247557137  | 10.53881477656304 | 10.42392184796862 |
| Ag | 20.57342051971952 | 12.53879649885659 | 16.44491531901740 |
| Ag | 10.47376895604238 | 10.56051336103779 | 4.22508089236318  |
| Ag | 14.51412986461657 | 10.59260406904088 | 8.34597045747927  |
| Ag | 6.44084794394663  | 10.53523532886680 | 16.39621477891638 |
| Ag | 8.51890013728310  | 16.57461772568415 | 8.40873121022203  |
| Ag | 16.52454633159446 | 12.52925487148581 | 20.56321088223651 |
| Pt | 10.48639645417251 | 10.59563711259045 | 16.39466638671144 |
| Pt | 12.51273873684831 | 12.56576082811812 | 16.40713960392388 |
| Pt | 8.48129260147818  | 12.55025488899624 | 16.38849041148625 |
| Pt | 12.54915161789915 | 14.59259863543226 | 14.42199162222488 |
| Pt | 14.54753636613002 | 12.59632027701142 | 14.43923290416120 |
| Pt | 10.52496938164230 | 14.61324376698633 | 12.45072756052837 |
| Pt | 12.47721570961130 | 10.60540257350870 | 10.43520424243576 |
| Pt | 14.51065197905480 | 6.57798083551443  | 12.44307836111938 |
| Pt | 16.55232798783322 | 12.56612786538026 | 12.44080902677515 |
| Pt | 14.53010019991079 | 10.57581146475352 | 16.40439670682003 |
| Pt | 18.58264129210093 | 12.52322488824426 | 14.43396606973170 |
| Pt | 10.52135406277753 | 16.56120032587537 | 10.46692369316816 |
| Pt | 12.50956783010076 | 8.64910069910055  | 16.35583539678236 |
| Pt | 12.51522563250272 | 12.58725097811039 | 8.40310424065263  |
| Pt | 14.53420497248962 | 8.60332622149208  | 14.41499034415897 |
| Pt | 8.47922479181471  | 14.57159405393417 | 14.40144316976230 |
| Pt | 12.50404129266809 | 10.62005360281938 | 14.38592834821291 |
| Pt | 10.52204017526953 | 12.56881748170678 | 10.43464981606203 |
| Pt | 16.51681258332691 | 10.59208425009165 | 10.42644569089163 |
| Pt | 8.53203744898986  | 14.55570892255338 | 10.45023759298695 |
| Pt | 6.44117956610916  | 12.57780766184962 | 14.39448154345185 |
| Pt | 8.52112074425317  | 10.58526150766923 | 14.38886975224097 |
| Pt | 16.53992465652716 | 10.56439879325235 | 14.45990826690230 |
| Pt | 12.51756274110580 | 6.58654477406561  | 14.37951291388922 |
| Pt | 8.49037156977906  | 12.57013383593682 | 12.43714155681577 |
| Pt | 14.53264692580395 | 12.60198116320658 | 10.43637864348260 |
| Pt | 18.56169652878323 | 10.56914932439753 | 12.45849275352520 |
| Pt | 12.53023649966668 | 16.60708156885947 | 12.43324929141347 |
| Pt | 10.47274426835536 | 10.57590709715987 | 12.38931147631721 |
| Pt | 14.53108624956222 | 10.61723398664598 | 12.41231667607164 |
| Pt | 6.46151541139855  | 14.58023905711890 | 12.44686184275189 |
| Pt | 10.51065867426252 | 12.61634831426868 | 14.41863632487041 |
| Pt | 14.55141581062857 | 14.59420490036767 | 12.43526504981872 |
| Pt | 16.54906802869321 | 12.52467272620855 | 16.43008934485990 |
| Pt | 12.52252080048789 | 14.57293175665606 | 10.44833728534040 |
| Pt | 10.50385980874530 | 8.60909587935167  | 14.37467709917403 |
| Pt | 8.47097914723775  | 16.59013817396594 | 12.40276469869464 |
| Pt | 12.50131180429510 | 8.59815978042572  | 12.41111177144203 |
| Pt | 10.52641809980018 | 14.54993860483489 | 8.42282439232854  |
| Pt | 12.53479728982014 | 12.59700342739945 | 12.45946287994044 |
| Pt | 12.50333564616208 | 10.57209822430579 | 18.43715862504534 |
| Pt | 16.50895644266809 | 8.60427886683490  | 12.43101890743833 |
| Pt | 14.49404796624503 | 8.63703807216556  | 10.44765050132505 |

\*\*\*\*\* END OF DATA \*\*\*\*\*
